# Supplementary material for: The HOSPITAL score and LACE index as predictors of 30 day readmission in a retrospective study at a university-affiliated community hospital
Source: PeerJ. 2017 Mar 29;5:e3137. doi: 10.7717/peerj.3137 (PMC5374974; doi:10.7717/peerj.3137)
Supplement: Data S1 [file peerj-05-3137-s001.xlsx]

## Sheet: All Dx Codes
MRN	FIN	Admit Dt	Disch Dt	LOS	Dx Code	Dx Desc	Dx Seq	POA	CodeList
0014578	260024823	2015-11-10	2015-11-13	3	K22.2	Esophageal obstruction	1	Y	K22.2
0014578	260024823	2015-11-10	2015-11-13	3	N39.0	Urinary tract infection, site not specified	2	Y	K22.2, N39.0
0014578	260024823	2015-11-10	2015-11-13	3	R13.10	Dysphagia, unspecified	3	Y	K22.2, N39.0, R13.10
0014578	260024823	2015-11-10	2015-11-13	3	J45.901	Unspecified asthma with (acute) exacerbation	4	Y	K22.2, N39.0, R13.10, J45.901
0014578	260024823	2015-11-10	2015-11-13	3	K20.9	Esophagitis, unspecified	5	Y	K22.2, N39.0, R13.10, J45.901, K20.9
0014578	260024823	2015-11-10	2015-11-13	3	K30	Functional dyspepsia	6	Y	K22.2, N39.0, R13.10, J45.901, K20.9, K30
0014578	260024823	2015-11-10	2015-11-13	3	I10	Essential (primary) hypertension	7	Y	K22.2, N39.0, R13.10, J45.901, K20.9, K30, I10
0014578	260024823	2015-11-10	2015-11-13	3	R11.2	Nausea with vomiting, unspecified	8	Y	K22.2, N39.0, R13.10, J45.901, K20.9, K30, I10, R11.2
0014578	260024823	2015-11-10	2015-11-13	3	E03.9	Hypothyroidism, unspecified	9	Y	K22.2, N39.0, R13.10, J45.901, K20.9, K30, I10, R11.2, E03.9
0014578	260024823	2015-11-10	2015-11-13	3	J45.909	Unspecified asthma, uncomplicated	10	Y	K22.2, N39.0, R13.10, J45.901, K20.9, K30, I10, R11.2, E03.9, J45.909
0014578	260024823	2015-11-10	2015-11-13	3	Z66	Do not resuscitate	11	Y	K22.2, N39.0, R13.10, J45.901, K20.9, K30, I10, R11.2, E03.9, J45.909, Z66
0014578	260024823	2015-11-10	2015-11-13	3	E78.5	Hyperlipidemia, unspecified	12	Y	K22.2, N39.0, R13.10, J45.901, K20.9, K30, I10, R11.2, E03.9, J45.909, Z66, E78.5
0014578	260024823	2015-11-10	2015-11-13	3	K44.9	Diaphragmatic hernia without obstruction or gangre	13	Y	K22.2, N39.0, R13.10, J45.901, K20.9, K30, I10, R11.2, E03.9, J45.909, Z66, E78.5, K44.9
0014578	260024823	2015-11-10	2015-11-13	3	Z87.440	Personal history of urinary (tract) infections	14		K22.2, N39.0, R13.10, J45.901, K20.9, K30, I10, R11.2, E03.9, J45.909, Z66, E78.5, K44.9, Z87.440
0014578	260024823	2015-11-10	2015-11-13	3	M19.90	Unspecified osteoarthritis, unspecified site	15	Y	K22.2, N39.0, R13.10, J45.901, K20.9, K30, I10, R11.2, E03.9, J45.909, Z66, E78.5, K44.9, Z87.440, M19.90
0014578	260024823	2015-11-10	2015-11-13	3	R32	Unspecified urinary incontinence	16	Y	K22.2, N39.0, R13.10, J45.901, K20.9, K30, I10, R11.2, E03.9, J45.909, Z66, E78.5, K44.9, Z87.440, M19.90, R32
0014578	260024823	2015-11-10	2015-11-13	3	Z87.891	Personal history of nicotine dependence	17		K22.2, N39.0, R13.10, J45.901, K20.9, K30, I10, R11.2, E03.9, J45.909, Z66, E78.5, K44.9, Z87.440, M19.90, R32, Z87.891
0014578	260024823	2015-11-10	2015-11-13	3	R63.4	Abnormal weight loss	18	Y	K22.2, N39.0, R13.10, J45.901, K20.9, K30, I10, R11.2, E03.9, J45.909, Z66, E78.5, K44.9, Z87.440, M19.90, R32, Z87.891, R63.4
0014578	260024823	2015-11-10	2015-11-13	3	K57.90	Diverticulosis of intestine, part unspecified, wit	19	Y	K22.2, N39.0, R13.10, J45.901, K20.9, K30, I10, R11.2, E03.9, J45.909, Z66, E78.5, K44.9, Z87.440, M19.90, R32, Z87.891, R63.4, K57.90
0014578	260024823	2015-11-10	2015-11-13	3	H91.93	Unspecified hearing loss, bilateral	20	Y	K22.2, N39.0, R13.10, J45.901, K20.9, K30, I10, R11.2, E03.9, J45.909, Z66, E78.5, K44.9, Z87.440, M19.90, R32, Z87.891, R63.4, K57.90, H91.93	Last
0017833	259706133	2015-10-28	2015-11-04	7	A41.02	Sepsis due to Methicillin resistant Staphylococcus	1	Y	A41.02
0017833	259706133	2015-10-28	2015-11-04	7	G93.41	Metabolic encephalopathy	2	Y	A41.02, G93.41
0017833	259706133	2015-10-28	2015-11-04	7	I69.354	Hemiplegia and hemiparesis following cerebral infa	3		A41.02, G93.41, I69.354
0017833	259706133	2015-10-28	2015-11-04	7	N39.0	Urinary tract infection, site not specified	4	Y	A41.02, G93.41, I69.354, N39.0
0017833	259706133	2015-10-28	2015-11-04	7	I08.1	Rheumatic disorders of both mitral and tricuspid v	5	Y	A41.02, G93.41, I69.354, N39.0, I08.1
0017833	259706133	2015-10-28	2015-11-04	7	I48.91	Unspecified atrial fibrillation	6	Y	A41.02, G93.41, I69.354, N39.0, I08.1, I48.91
0017833	259706133	2015-10-28	2015-11-04	7	R65.20	Severe sepsis without septic shock	7	Y	A41.02, G93.41, I69.354, N39.0, I08.1, I48.91, R65.20
0017833	259706133	2015-10-28	2015-11-04	7	Z66	Do not resuscitate	8	Y	A41.02, G93.41, I69.354, N39.0, I08.1, I48.91, R65.20, Z66
0017833	259706133	2015-10-28	2015-11-04	7	E11.9	Type 2 diabetes mellitus without complications	9	Y	A41.02, G93.41, I69.354, N39.0, I08.1, I48.91, R65.20, Z66, E11.9
0017833	259706133	2015-10-28	2015-11-04	7	I10	Essential (primary) hypertension	10	Y	A41.02, G93.41, I69.354, N39.0, I08.1, I48.91, R65.20, Z66, E11.9, I10
0017833	259706133	2015-10-28	2015-11-04	7	Z87.891	Personal history of nicotine dependence	11		A41.02, G93.41, I69.354, N39.0, I08.1, I48.91, R65.20, Z66, E11.9, I10, Z87.891
0017833	259706133	2015-10-28	2015-11-04	7	Z89.512	Acquired absence of left leg below knee	12		A41.02, G93.41, I69.354, N39.0, I08.1, I48.91, R65.20, Z66, E11.9, I10, Z87.891, Z89.512
0017833	259706133	2015-10-28	2015-11-04	7	I69.31	Cognitive deficits following cerebral infarction	13		A41.02, G93.41, I69.354, N39.0, I08.1, I48.91, R65.20, Z66, E11.9, I10, Z87.891, Z89.512, I69.31
0017833	259706133	2015-10-28	2015-11-04	7	Z79.02	Long term (current) use of antithrombotics/antipla	14		A41.02, G93.41, I69.354, N39.0, I08.1, I48.91, R65.20, Z66, E11.9, I10, Z87.891, Z89.512, I69.31, Z79.02
0017833	259706133	2015-10-28	2015-11-04	7	Z79.82	Long term (current) use of aspirin	15		A41.02, G93.41, I69.354, N39.0, I08.1, I48.91, R65.20, Z66, E11.9, I10, Z87.891, Z89.512, I69.31, Z79.02, Z79.82	Last
0027160	261315212	2015-12-25	2015-12-27	2	I50.43	Acute on chronic combined systolic (congestive) an	1	Y	I50.43
0027160	261315212	2015-12-25	2015-12-27	2	N17.9	Acute kidney failure, unspecified	2	Y	I50.43, N17.9
0027160	261315212	2015-12-25	2015-12-27	2	J90	Pleural effusion, not elsewhere classified	3	Y	I50.43, N17.9, J90
0027160	261315212	2015-12-25	2015-12-27	2	J81.1	Chronic pulmonary edema	4	Y	I50.43, N17.9, J90, J81.1
0027160	261315212	2015-12-25	2015-12-27	2	I25.82	Chronic total occlusion of coronary artery	5	Y	I50.43, N17.9, J90, J81.1, I25.82
0027160	261315212	2015-12-25	2015-12-27	2	I25.10	Atherosclerotic heart disease of native coronary a	6	Y	I50.43, N17.9, J90, J81.1, I25.82, I25.10
0027160	261315212	2015-12-25	2015-12-27	2	Z95.1	Presence of aortocoronary bypass graft	7		I50.43, N17.9, J90, J81.1, I25.82, I25.10, Z95.1
0027160	261315212	2015-12-25	2015-12-27	2	I48.0	Paroxysmal atrial fibrillation	8	Y	I50.43, N17.9, J90, J81.1, I25.82, I25.10, Z95.1, I48.0
0027160	261315212	2015-12-25	2015-12-27	2	E11.9	Type 2 diabetes mellitus without complications	9	Y	I50.43, N17.9, J90, J81.1, I25.82, I25.10, Z95.1, I48.0, E11.9
0027160	261315212	2015-12-25	2015-12-27	2	I10	Essential (primary) hypertension	10	Y	I50.43, N17.9, J90, J81.1, I25.82, I25.10, Z95.1, I48.0, E11.9, I10
0027160	261315212	2015-12-25	2015-12-27	2	E78.5	Hyperlipidemia, unspecified	11	Y	I50.43, N17.9, J90, J81.1, I25.82, I25.10, Z95.1, I48.0, E11.9, I10, E78.5
0027160	261315212	2015-12-25	2015-12-27	2	I34.0	Nonrheumatic mitral (valve) insufficiency	12	Y	I50.43, N17.9, J90, J81.1, I25.82, I25.10, Z95.1, I48.0, E11.9, I10, E78.5, I34.0
0027160	261315212	2015-12-25	2015-12-27	2	I25.2	Old myocardial infarction	13		I50.43, N17.9, J90, J81.1, I25.82, I25.10, Z95.1, I48.0, E11.9, I10, E78.5, I34.0, I25.2	Last
0027221	258835131	2015-09-28	2015-10-07	9	I82.412	Acute embolism and thrombosis of left femoral vein	1	Y	I82.412
0027221	258835131	2015-09-28	2015-10-07	9	I82.422	Acute embolism and thrombosis of left iliac vein	2	Y	I82.412, I82.422
0027221	258835131	2015-09-28	2015-10-07	9	G35	Multiple sclerosis	3	Y	I82.412, I82.422, G35
0027221	258835131	2015-09-28	2015-10-07	9	D50.9	Iron deficiency anemia, unspecified	4	Y	I82.412, I82.422, G35, D50.9
0027221	258835131	2015-09-28	2015-10-07	9	I10	Essential (primary) hypertension	5	Y	I82.412, I82.422, G35, D50.9, I10
0027221	258835131	2015-09-28	2015-10-07	9	E11.9	Type 2 diabetes mellitus without complications	6	Y	I82.412, I82.422, G35, D50.9, I10, E11.9
0027221	258835131	2015-09-28	2015-10-07	9	I82.432	Acute embolism and thrombosis of left popliteal ve	7	Y	I82.412, I82.422, G35, D50.9, I10, E11.9, I82.432
0027221	258835131	2015-09-28	2015-10-07	9	R19.09	Other intra-abdominal and pelvic swelling, mass an	8	Y	I82.412, I82.422, G35, D50.9, I10, E11.9, I82.432, R19.09
0027221	258835131	2015-09-28	2015-10-07	9	J44.9	Chronic obstructive pulmonary disease, unspecified	9	Y	I82.412, I82.422, G35, D50.9, I10, E11.9, I82.432, R19.09, J44.9
0027221	258835131	2015-09-28	2015-10-07	9	J45.909	Unspecified asthma, uncomplicated	10	Y	I82.412, I82.422, G35, D50.9, I10, E11.9, I82.432, R19.09, J44.9, J45.909
0027221	258835131	2015-09-28	2015-10-07	9	Z85.43	Personal history of malignant neoplasm of ovary	11		I82.412, I82.422, G35, D50.9, I10, E11.9, I82.432, R19.09, J44.9, J45.909, Z85.43	Last
0028119	263763989	2016-03-18	2016-03-22	4	I48.0	Paroxysmal atrial fibrillation	1	Y	I48.0
0028119	263763989	2016-03-18	2016-03-22	4	N39.0	Urinary tract infection, site not specified	2	Y	I48.0, N39.0
0028119	263763989	2016-03-18	2016-03-22	4	E87.1	Hypo-osmolality and hyponatremia	3	Y	I48.0, N39.0, E87.1
0028119	263763989	2016-03-18	2016-03-22	4	I34.0	Nonrheumatic mitral (valve) insufficiency	4	Y	I48.0, N39.0, E87.1, I34.0
0028119	263763989	2016-03-18	2016-03-22	4	I10	Essential (primary) hypertension	5	Y	I48.0, N39.0, E87.1, I34.0, I10
0028119	263763989	2016-03-18	2016-03-22	4	D72.829	Elevated white blood cell count, unspecified	6	Y	I48.0, N39.0, E87.1, I34.0, I10, D72.829
0028119	263763989	2016-03-18	2016-03-22	4	S61.412A	Laceration without foreign body of left hand, init	7	Y	I48.0, N39.0, E87.1, I34.0, I10, D72.829, S61.412A
0028119	263763989	2016-03-18	2016-03-22	4	E78.5	Hyperlipidemia, unspecified	8	Y	I48.0, N39.0, E87.1, I34.0, I10, D72.829, S61.412A, E78.5
0028119	263763989	2016-03-18	2016-03-22	4	I25.10	Atherosclerotic heart disease of native coronary a	9	Y	I48.0, N39.0, E87.1, I34.0, I10, D72.829, S61.412A, E78.5, I25.10
0028119	263763989	2016-03-18	2016-03-22	4	W18.30XA	Fall on same level, unspecified, initial encounter	10	Y	I48.0, N39.0, E87.1, I34.0, I10, D72.829, S61.412A, E78.5, I25.10, W18.30XA
0028119	263763989	2016-03-18	2016-03-22	4	Z85.43	Personal history of malignant neoplasm of ovary	11		I48.0, N39.0, E87.1, I34.0, I10, D72.829, S61.412A, E78.5, I25.10, W18.30XA, Z85.43
0028119	263763989	2016-03-18	2016-03-22	4	Z92.21	Personal history of antineoplastic chemotherapy	12		I48.0, N39.0, E87.1, I34.0, I10, D72.829, S61.412A, E78.5, I25.10, W18.30XA, Z85.43, Z92.21
0028119	263763989	2016-03-18	2016-03-22	4	Z91.81	History of falling	13		I48.0, N39.0, E87.1, I34.0, I10, D72.829, S61.412A, E78.5, I25.10, W18.30XA, Z85.43, Z92.21, Z91.81	Last
0032550	258973817	2015-10-02	2015-10-09	7	S82.842A	Displaced bimalleolar fracture of left lower leg,	1	Y	S82.842A
0032550	258973817	2015-10-02	2015-10-09	7	I50.32	Chronic diastolic (congestive) heart failure	2	Y	S82.842A, I50.32
0032550	258973817	2015-10-02	2015-10-09	7	R65.10	Systemic inflammatory response syndrome (SIRS) of	3	Y	S82.842A, I50.32, R65.10
0032550	258973817	2015-10-02	2015-10-09	7	Z68.41	Body mass index (BMI) 40.0-44.9, adult	4		S82.842A, I50.32, R65.10, Z68.41
0032550	258973817	2015-10-02	2015-10-09	7	E55.9	Vitamin D deficiency, unspecified	5	Y	S82.842A, I50.32, R65.10, Z68.41, E55.9
0032550	258973817	2015-10-02	2015-10-09	7	E83.52	Hypercalcemia	6	Y	S82.842A, I50.32, R65.10, Z68.41, E55.9, E83.52
0032550	258973817	2015-10-02	2015-10-09	7	I50.9	Heart failure, unspecified	7	Y	S82.842A, I50.32, R65.10, Z68.41, E55.9, E83.52, I50.9
0032550	258973817	2015-10-02	2015-10-09	7	R00.0	Tachycardia, unspecified	8	Y	S82.842A, I50.32, R65.10, Z68.41, E55.9, E83.52, I50.9, R00.0
0032550	258973817	2015-10-02	2015-10-09	7	E78.5	Hyperlipidemia, unspecified	9	Y	S82.842A, I50.32, R65.10, Z68.41, E55.9, E83.52, I50.9, R00.0, E78.5
0032550	258973817	2015-10-02	2015-10-09	7	I10	Essential (primary) hypertension	10	Y	S82.842A, I50.32, R65.10, Z68.41, E55.9, E83.52, I50.9, R00.0, E78.5, I10
0032550	258973817	2015-10-02	2015-10-09	7	I25.10	Atherosclerotic heart disease of native coronary a	11	Y	S82.842A, I50.32, R65.10, Z68.41, E55.9, E83.52, I50.9, R00.0, E78.5, I10, I25.10
0032550	258973817	2015-10-02	2015-10-09	7	Z95.5	Presence of coronary angioplasty implant and graft	12		S82.842A, I50.32, R65.10, Z68.41, E55.9, E83.52, I50.9, R00.0, E78.5, I10, I25.10, Z95.5
0032550	258973817	2015-10-02	2015-10-09	7	R53.1	Weakness	13	Y	S82.842A, I50.32, R65.10, Z68.41, E55.9, E83.52, I50.9, R00.0, E78.5, I10, I25.10, Z95.5, R53.1
0032550	258973817	2015-10-02	2015-10-09	7	E21.0	Primary hyperparathyroidism	14	Y	S82.842A, I50.32, R65.10, Z68.41, E55.9, E83.52, I50.9, R00.0, E78.5, I10, I25.10, Z95.5, R53.1, E21.0
0032550	258973817	2015-10-02	2015-10-09	7	K59.00	Constipation, unspecified	15	Y	S82.842A, I50.32, R65.10, Z68.41, E55.9, E83.52, I50.9, R00.0, E78.5, I10, I25.10, Z95.5, R53.1, E21.0, K59.00
0032550	258973817	2015-10-02	2015-10-09	7	E66.01	Morbid (severe) obesity due to excess calories	16	Y	S82.842A, I50.32, R65.10, Z68.41, E55.9, E83.52, I50.9, R00.0, E78.5, I10, I25.10, Z95.5, R53.1, E21.0, K59.00, E66.01
0032550	258973817	2015-10-02	2015-10-09	7	R33.9	Retention of urine, unspecified	17	N	S82.842A, I50.32, R65.10, Z68.41, E55.9, E83.52, I50.9, R00.0, E78.5, I10, I25.10, Z95.5, R53.1, E21.0, K59.00, E66.01, R33.9
0032550	258973817	2015-10-02	2015-10-09	7	N40.0	Enlarged prostate without lower urinary tract symp	18	Y	S82.842A, I50.32, R65.10, Z68.41, E55.9, E83.52, I50.9, R00.0, E78.5, I10, I25.10, Z95.5, R53.1, E21.0, K59.00, E66.01, R33.9, N40.0
0032550	258973817	2015-10-02	2015-10-09	7	G47.33	Obstructive sleep apnea (adult) (pediatric)	19	Y	S82.842A, I50.32, R65.10, Z68.41, E55.9, E83.52, I50.9, R00.0, E78.5, I10, I25.10, Z95.5, R53.1, E21.0, K59.00, E66.01, R33.9, N40.0, G47.33
0032550	258973817	2015-10-02	2015-10-09	7	W18.30XA	Fall on same level, unspecified, initial encounter	20	Y	S82.842A, I50.32, R65.10, Z68.41, E55.9, E83.52, I50.9, R00.0, E78.5, I10, I25.10, Z95.5, R53.1, E21.0, K59.00, E66.01, R33.9, N40.0, G47.33, W18.30XA
0032550	258973817	2015-10-02	2015-10-09	7	Z79.02	Long term (current) use of antithrombotics/antipla	21		S82.842A, I50.32, R65.10, Z68.41, E55.9, E83.52, I50.9, R00.0, E78.5, I10, I25.10, Z95.5, R53.1, E21.0, K59.00, E66.01, R33.9, N40.0, G47.33, W18.30XA, Z79.02	Last
0037834	263006587	2016-02-23	2016-02-28	5	A41.9	Sepsis, unspecified organism	1	Y	A41.9
0037834	263006587	2016-02-23	2016-02-28	5	J96.01	Acute respiratory failure with hypoxia	2	Y	A41.9, J96.01
0037834	263006587	2016-02-23	2016-02-28	5	I50.23	Acute on chronic systolic (congestive) heart failu	3	Y	A41.9, J96.01, I50.23
0037834	263006587	2016-02-23	2016-02-28	5	J96.02	Acute respiratory failure with hypercapnia	4	Y	A41.9, J96.01, I50.23, J96.02
0037834	263006587	2016-02-23	2016-02-28	5	J18.9	Pneumonia, unspecified organism	5	Y	A41.9, J96.01, I50.23, J96.02, J18.9
0037834	263006587	2016-02-23	2016-02-28	5	N17.9	Acute kidney failure, unspecified	6	N	A41.9, J96.01, I50.23, J96.02, J18.9, N17.9
0037834	263006587	2016-02-23	2016-02-28	5	Z94.0	Kidney transplant status	7		A41.9, J96.01, I50.23, J96.02, J18.9, N17.9, Z94.0
0037834	263006587	2016-02-23	2016-02-28	5	I25.10	Atherosclerotic heart disease of native coronary a	8	Y	A41.9, J96.01, I50.23, J96.02, J18.9, N17.9, Z94.0, I25.10
0037834	263006587	2016-02-23	2016-02-28	5	I12.9	Hypertensive chronic kidney disease with stage 1 t	9	Y	A41.9, J96.01, I50.23, J96.02, J18.9, N17.9, Z94.0, I25.10, I12.9
0037834	263006587	2016-02-23	2016-02-28	5	N18.9	Chronic kidney disease, unspecified	10	Y	A41.9, J96.01, I50.23, J96.02, J18.9, N17.9, Z94.0, I25.10, I12.9, N18.9
0037834	263006587	2016-02-23	2016-02-28	5	E78.5	Hyperlipidemia, unspecified	11	Y	A41.9, J96.01, I50.23, J96.02, J18.9, N17.9, Z94.0, I25.10, I12.9, N18.9, E78.5
0037834	263006587	2016-02-23	2016-02-28	5	B96.89	Other specified bacterial agents as the cause of d	12	Y	A41.9, J96.01, I50.23, J96.02, J18.9, N17.9, Z94.0, I25.10, I12.9, N18.9, E78.5, B96.89
0037834	263006587	2016-02-23	2016-02-28	5	E11.9	Type 2 diabetes mellitus without complications	13	Y	A41.9, J96.01, I50.23, J96.02, J18.9, N17.9, Z94.0, I25.10, I12.9, N18.9, E78.5, B96.89, E11.9
0037834	263006587	2016-02-23	2016-02-28	5	G47.33	Obstructive sleep apnea (adult) (pediatric)	14	Y	A41.9, J96.01, I50.23, J96.02, J18.9, N17.9, Z94.0, I25.10, I12.9, N18.9, E78.5, B96.89, E11.9, G47.33
0037834	263006587	2016-02-23	2016-02-28	5	N31.9	Neuromuscular dysfunction of bladder, unspecified	15	Y	A41.9, J96.01, I50.23, J96.02, J18.9, N17.9, Z94.0, I25.10, I12.9, N18.9, E78.5, B96.89, E11.9, G47.33, N31.9
0037834	263006587	2016-02-23	2016-02-28	5	I25.2	Old myocardial infarction	16		A41.9, J96.01, I50.23, J96.02, J18.9, N17.9, Z94.0, I25.10, I12.9, N18.9, E78.5, B96.89, E11.9, G47.33, N31.9, I25.2
0037834	263006587	2016-02-23	2016-02-28	5	Z88.1	Allergy status to other antibiotic agents status	17		A41.9, J96.01, I50.23, J96.02, J18.9, N17.9, Z94.0, I25.10, I12.9, N18.9, E78.5, B96.89, E11.9, G47.33, N31.9, I25.2, Z88.1
0037834	263006587	2016-02-23	2016-02-28	5	Z95.5	Presence of coronary angioplasty implant and graft	18		A41.9, J96.01, I50.23, J96.02, J18.9, N17.9, Z94.0, I25.10, I12.9, N18.9, E78.5, B96.89, E11.9, G47.33, N31.9, I25.2, Z88.1, Z95.5
0037834	263006587	2016-02-23	2016-02-28	5	Z88.8	Allergy status to other drugs, medicaments and bio	19		A41.9, J96.01, I50.23, J96.02, J18.9, N17.9, Z94.0, I25.10, I12.9, N18.9, E78.5, B96.89, E11.9, G47.33, N31.9, I25.2, Z88.1, Z95.5, Z88.8
0037834	263006587	2016-02-23	2016-02-28	5	Z79.4	Long term (current) use of insulin	20		A41.9, J96.01, I50.23, J96.02, J18.9, N17.9, Z94.0, I25.10, I12.9, N18.9, E78.5, B96.89, E11.9, G47.33, N31.9, I25.2, Z88.1, Z95.5, Z88.8, Z79.4	Last
0041688	261467278	2016-01-02	2016-01-09	7	A41.9	Sepsis, unspecified organism	1	Y	A41.9
0041688	261467278	2016-01-02	2016-01-09	7	J96.21	Acute and chronic respiratory failure with hypoxia	2	Y	A41.9, J96.21
0041688	261467278	2016-01-02	2016-01-09	7	R65.20	Severe sepsis without septic shock	3	Y	A41.9, J96.21, R65.20
0041688	261467278	2016-01-02	2016-01-09	7	J18.9	Pneumonia, unspecified organism	4	Y	A41.9, J96.21, R65.20, J18.9
0041688	261467278	2016-01-02	2016-01-09	7	N17.9	Acute kidney failure, unspecified	5	Y	A41.9, J96.21, R65.20, J18.9, N17.9
0041688	261467278	2016-01-02	2016-01-09	7	E87.2	Acidosis	6	Y	A41.9, J96.21, R65.20, J18.9, N17.9, E87.2
0041688	261467278	2016-01-02	2016-01-09	7	I50.32	Chronic diastolic (congestive) heart failure	7	Y	A41.9, J96.21, R65.20, J18.9, N17.9, E87.2, I50.32
0041688	261467278	2016-01-02	2016-01-09	7	E11.40	Type 2 diabetes mellitus with diabetic neuropathy,	8	Y	A41.9, J96.21, R65.20, J18.9, N17.9, E87.2, I50.32, E11.40
0041688	261467278	2016-01-02	2016-01-09	7	J96.22	Acute and chronic respiratory failure with hyperca	9	Y	A41.9, J96.21, R65.20, J18.9, N17.9, E87.2, I50.32, E11.40, J96.22
0041688	261467278	2016-01-02	2016-01-09	7	J44.1	Chronic obstructive pulmonary disease with (acute)	10	Y	A41.9, J96.21, R65.20, J18.9, N17.9, E87.2, I50.32, E11.40, J96.22, J44.1
0041688	261467278	2016-01-02	2016-01-09	7	J44.0	Chronic obstructive pulmonary disease with acute l	11	Y	A41.9, J96.21, R65.20, J18.9, N17.9, E87.2, I50.32, E11.40, J96.22, J44.1, J44.0
0041688	261467278	2016-01-02	2016-01-09	7	N39.0	Urinary tract infection, site not specified	12	N	A41.9, J96.21, R65.20, J18.9, N17.9, E87.2, I50.32, E11.40, J96.22, J44.1, J44.0, N39.0
0041688	261467278	2016-01-02	2016-01-09	7	Z99.81	Dependence on supplemental oxygen	13		A41.9, J96.21, R65.20, J18.9, N17.9, E87.2, I50.32, E11.40, J96.22, J44.1, J44.0, N39.0, Z99.81
0041688	261467278	2016-01-02	2016-01-09	7	Y95	Nosocomial condition	14	Y	A41.9, J96.21, R65.20, J18.9, N17.9, E87.2, I50.32, E11.40, J96.22, J44.1, J44.0, N39.0, Z99.81, Y95
0041688	261467278	2016-01-02	2016-01-09	7	I34.0	Nonrheumatic mitral (valve) insufficiency	15	Y	A41.9, J96.21, R65.20, J18.9, N17.9, E87.2, I50.32, E11.40, J96.22, J44.1, J44.0, N39.0, Z99.81, Y95, I34.0
0041688	261467278	2016-01-02	2016-01-09	7	E87.6	Hypokalemia	16	Y	A41.9, J96.21, R65.20, J18.9, N17.9, E87.2, I50.32, E11.40, J96.22, J44.1, J44.0, N39.0, Z99.81, Y95, I34.0, E87.6
0041688	261467278	2016-01-02	2016-01-09	7	G47.33	Obstructive sleep apnea (adult) (pediatric)	17	Y	A41.9, J96.21, R65.20, J18.9, N17.9, E87.2, I50.32, E11.40, J96.22, J44.1, J44.0, N39.0, Z99.81, Y95, I34.0, E87.6, G47.33
0041688	261467278	2016-01-02	2016-01-09	7	I10	Essential (primary) hypertension	18	Y	A41.9, J96.21, R65.20, J18.9, N17.9, E87.2, I50.32, E11.40, J96.22, J44.1, J44.0, N39.0, Z99.81, Y95, I34.0, E87.6, G47.33, I10
0041688	261467278	2016-01-02	2016-01-09	7	I25.10	Atherosclerotic heart disease of native coronary a	19	Y	A41.9, J96.21, R65.20, J18.9, N17.9, E87.2, I50.32, E11.40, J96.22, J44.1, J44.0, N39.0, Z99.81, Y95, I34.0, E87.6, G47.33, I10, I25.10
0041688	261467278	2016-01-02	2016-01-09	7	Z95.1	Presence of aortocoronary bypass graft	20		A41.9, J96.21, R65.20, J18.9, N17.9, E87.2, I50.32, E11.40, J96.22, J44.1, J44.0, N39.0, Z99.81, Y95, I34.0, E87.6, G47.33, I10, I25.10, Z95.1
0041688	261467278	2016-01-02	2016-01-09	7	Z95.5	Presence of coronary angioplasty implant and graft	21		A41.9, J96.21, R65.20, J18.9, N17.9, E87.2, I50.32, E11.40, J96.22, J44.1, J44.0, N39.0, Z99.81, Y95, I34.0, E87.6, G47.33, I10, I25.10, Z95.1, Z95.5
0041688	261467278	2016-01-02	2016-01-09	7	Z87.01	Personal history of pneumonia (recurrent)	22		A41.9, J96.21, R65.20, J18.9, N17.9, E87.2, I50.32, E11.40, J96.22, J44.1, J44.0, N39.0, Z99.81, Y95, I34.0, E87.6, G47.33, I10, I25.10, Z95.1, Z95.5, Z87.01
0041688	261467278	2016-01-02	2016-01-09	7	Z87.891	Personal history of nicotine dependence	23		A41.9, J96.21, R65.20, J18.9, N17.9, E87.2, I50.32, E11.40, J96.22, J44.1, J44.0, N39.0, Z99.81, Y95, I34.0, E87.6, G47.33, I10, I25.10, Z95.1, Z95.5, Z87.01, Z87.891	Last
0042047	259928604	2015-11-04	2015-11-18	14	A41.01	Sepsis due to Methicillin susceptible Staphylococc	1	Y	A41.01
0042047	259928604	2015-11-04	2015-11-18	14	G93.41	Metabolic encephalopathy	2	Y	A41.01, G93.41
0042047	259928604	2015-11-04	2015-11-18	14	N17.9	Acute kidney failure, unspecified	3	Y	A41.01, G93.41, N17.9
0042047	259928604	2015-11-04	2015-11-18	14	E87.0	Hyperosmolality and hypernatremia	4	Y	A41.01, G93.41, N17.9, E87.0
0042047	259928604	2015-11-04	2015-11-18	14	E87.4	Mixed disorder of acid-base balance	5	N	A41.01, G93.41, N17.9, E87.0, E87.4
0042047	259928604	2015-11-04	2015-11-18	14	J96.11	Chronic respiratory failure with hypoxia	6	Y	A41.01, G93.41, N17.9, E87.0, E87.4, J96.11
0042047	259928604	2015-11-04	2015-11-18	14	D68.9	Coagulation defect, unspecified	7	N	A41.01, G93.41, N17.9, E87.0, E87.4, J96.11, D68.9
0042047	259928604	2015-11-04	2015-11-18	14	J18.9	Pneumonia, unspecified organism	8	N	A41.01, G93.41, N17.9, E87.0, E87.4, J96.11, D68.9, J18.9
0042047	259928604	2015-11-04	2015-11-18	14	I85.00	Esophageal varices without bleeding	9	Y	A41.01, G93.41, N17.9, E87.0, E87.4, J96.11, D68.9, J18.9, I85.00
0042047	259928604	2015-11-04	2015-11-18	14	E87.1	Hypo-osmolality and hyponatremia	10	N	A41.01, G93.41, N17.9, E87.0, E87.4, J96.11, D68.9, J18.9, I85.00, E87.1
0042047	259928604	2015-11-04	2015-11-18	14	N39.0	Urinary tract infection, site not specified	11	Y	A41.01, G93.41, N17.9, E87.0, E87.4, J96.11, D68.9, J18.9, I85.00, E87.1, N39.0
0042047	259928604	2015-11-04	2015-11-18	14	K76.6	Portal hypertension	12	Y	A41.01, G93.41, N17.9, E87.0, E87.4, J96.11, D68.9, J18.9, I85.00, E87.1, N39.0, K76.6
0042047	259928604	2015-11-04	2015-11-18	14	R65.20	Severe sepsis without septic shock	13	Y	A41.01, G93.41, N17.9, E87.0, E87.4, J96.11, D68.9, J18.9, I85.00, E87.1, N39.0, K76.6, R65.20
0042047	259928604	2015-11-04	2015-11-18	14	D69.6	Thrombocytopenia, unspecified	14	Y	A41.01, G93.41, N17.9, E87.0, E87.4, J96.11, D68.9, J18.9, I85.00, E87.1, N39.0, K76.6, R65.20, D69.6
0042047	259928604	2015-11-04	2015-11-18	14	E11.65	Type 2 diabetes mellitus with hyperglycemia	15	Y	A41.01, G93.41, N17.9, E87.0, E87.4, J96.11, D68.9, J18.9, I85.00, E87.1, N39.0, K76.6, R65.20, D69.6, E11.65
0042047	259928604	2015-11-04	2015-11-18	14	K74.69	Other cirrhosis of liver	16	Y	A41.01, G93.41, N17.9, E87.0, E87.4, J96.11, D68.9, J18.9, I85.00, E87.1, N39.0, K76.6, R65.20, D69.6, E11.65, K74.69
0042047	259928604	2015-11-04	2015-11-18	14	J44.9	Chronic obstructive pulmonary disease, unspecified	17	Y	A41.01, G93.41, N17.9, E87.0, E87.4, J96.11, D68.9, J18.9, I85.00, E87.1, N39.0, K76.6, R65.20, D69.6, E11.65, K74.69, J44.9
0042047	259928604	2015-11-04	2015-11-18	14	E83.42	Hypomagnesemia	18	Y	A41.01, G93.41, N17.9, E87.0, E87.4, J96.11, D68.9, J18.9, I85.00, E87.1, N39.0, K76.6, R65.20, D69.6, E11.65, K74.69, J44.9, E83.42
0042047	259928604	2015-11-04	2015-11-18	14	E87.70	Fluid overload, unspecified	19	N	A41.01, G93.41, N17.9, E87.0, E87.4, J96.11, D68.9, J18.9, I85.00, E87.1, N39.0, K76.6, R65.20, D69.6, E11.65, K74.69, J44.9, E83.42, E87.70
0042047	259928604	2015-11-04	2015-11-18	14	E88.81	Metabolic syndrome	20	N	A41.01, G93.41, N17.9, E87.0, E87.4, J96.11, D68.9, J18.9, I85.00, E87.1, N39.0, K76.6, R65.20, D69.6, E11.65, K74.69, J44.9, E83.42, E87.70, E88.81
0042047	259928604	2015-11-04	2015-11-18	14	I07.1	Rheumatic tricuspid insufficiency	21	Y	A41.01, G93.41, N17.9, E87.0, E87.4, J96.11, D68.9, J18.9, I85.00, E87.1, N39.0, K76.6, R65.20, D69.6, E11.65, K74.69, J44.9, E83.42, E87.70, E88.81, I07.1
0042047	259928604	2015-11-04	2015-11-18	14	I25.10	Atherosclerotic heart disease of native coronary a	22	Y	A41.01, G93.41, N17.9, E87.0, E87.4, J96.11, D68.9, J18.9, I85.00, E87.1, N39.0, K76.6, R65.20, D69.6, E11.65, K74.69, J44.9, E83.42, E87.70, E88.81, I07.1, I25.10
0042047	259928604	2015-11-04	2015-11-18	14	I70.0	Atherosclerosis of aorta	23	Y	A41.01, G93.41, N17.9, E87.0, E87.4, J96.11, D68.9, J18.9, I85.00, E87.1, N39.0, K76.6, R65.20, D69.6, E11.65, K74.69, J44.9, E83.42, E87.70, E88.81, I07.1, I25.10, I70.0
0042047	259928604	2015-11-04	2015-11-18	14	Z66	Do not resuscitate	24	Y	A41.01, G93.41, N17.9, E87.0, E87.4, J96.11, D68.9, J18.9, I85.00, E87.1, N39.0, K76.6, R65.20, D69.6, E11.65, K74.69, J44.9, E83.42, E87.70, E88.81, I07.1, I25.10, I70.0, Z66
0042047	259928604	2015-11-04	2015-11-18	14	I25.2	Old myocardial infarction	25		A41.01, G93.41, N17.9, E87.0, E87.4, J96.11, D68.9, J18.9, I85.00, E87.1, N39.0, K76.6, R65.20, D69.6, E11.65, K74.69, J44.9, E83.42, E87.70, E88.81, I07.1, I25.10, I70.0, Z66, I25.2
0042047	259928604	2015-11-04	2015-11-18	14	D73.1	Hypersplenism	26	Y	A41.01, G93.41, N17.9, E87.0, E87.4, J96.11, D68.9, J18.9, I85.00, E87.1, N39.0, K76.6, R65.20, D69.6, E11.65, K74.69, J44.9, E83.42, E87.70, E88.81, I07.1, I25.10, I70.0, Z66, I25.2, D73.1
0042047	259928604	2015-11-04	2015-11-18	14	M06.9	Rheumatoid arthritis, unspecified	27	Y	A41.01, G93.41, N17.9, E87.0, E87.4, J96.11, D68.9, J18.9, I85.00, E87.1, N39.0, K76.6, R65.20, D69.6, E11.65, K74.69, J44.9, E83.42, E87.70, E88.81, I07.1, I25.10, I70.0, Z66, I25.2, D73.1, M06.9
0042047	259928604	2015-11-04	2015-11-18	14	B35.6	Tinea cruris	28	N	A41.01, G93.41, N17.9, E87.0, E87.4, J96.11, D68.9, J18.9, I85.00, E87.1, N39.0, K76.6, R65.20, D69.6, E11.65, K74.69, J44.9, E83.42, E87.70, E88.81, I07.1, I25.10, I70.0, Z66, I25.2, D73.1, M06.9, B35.6
0042047	259928604	2015-11-04	2015-11-18	14	I10	Essential (primary) hypertension	29	Y	A41.01, G93.41, N17.9, E87.0, E87.4, J96.11, D68.9, J18.9, I85.00, E87.1, N39.0, K76.6, R65.20, D69.6, E11.65, K74.69, J44.9, E83.42, E87.70, E88.81, I07.1, I25.10, I70.0, Z66, I25.2, D73.1, M06.9, B35.6, I10
0042047	259928604	2015-11-04	2015-11-18	14	E87.6	Hypokalemia	30	Y	A41.01, G93.41, N17.9, E87.0, E87.4, J96.11, D68.9, J18.9, I85.00, E87.1, N39.0, K76.6, R65.20, D69.6, E11.65, K74.69, J44.9, E83.42, E87.70, E88.81, I07.1, I25.10, I70.0, Z66, I25.2, D73.1, M06.9, B35.6, I10, E87.6	Last
0043220	262508971	2016-02-07	2016-02-09	2	A41.9	Sepsis, unspecified organism	1	Y	A41.9
0043220	262508971	2016-02-07	2016-02-09	2	J96.01	Acute respiratory failure with hypoxia	2	Y	A41.9, J96.01
0043220	262508971	2016-02-07	2016-02-09	2	R65.20	Severe sepsis without septic shock	3	Y	A41.9, J96.01, R65.20
0043220	262508971	2016-02-07	2016-02-09	2	J18.9	Pneumonia, unspecified organism	4	Y	A41.9, J96.01, R65.20, J18.9
0043220	262508971	2016-02-07	2016-02-09	2	I50.32	Chronic diastolic (congestive) heart failure	5	Y	A41.9, J96.01, R65.20, J18.9, I50.32
0043220	262508971	2016-02-07	2016-02-09	2	E11.9	Type 2 diabetes mellitus without complications	6	Y	A41.9, J96.01, R65.20, J18.9, I50.32, E11.9
0043220	262508971	2016-02-07	2016-02-09	2	I35.0	Nonrheumatic aortic (valve) stenosis	7	Y	A41.9, J96.01, R65.20, J18.9, I50.32, E11.9, I35.0
0043220	262508971	2016-02-07	2016-02-09	2	J44.1	Chronic obstructive pulmonary disease with (acute)	8	Y	A41.9, J96.01, R65.20, J18.9, I50.32, E11.9, I35.0, J44.1
0043220	262508971	2016-02-07	2016-02-09	2	F41.9	Anxiety disorder, unspecified	9	Y	A41.9, J96.01, R65.20, J18.9, I50.32, E11.9, I35.0, J44.1, F41.9
0043220	262508971	2016-02-07	2016-02-09	2	I25.10	Atherosclerotic heart disease of native coronary a	10	Y	A41.9, J96.01, R65.20, J18.9, I50.32, E11.9, I35.0, J44.1, F41.9, I25.10
0043220	262508971	2016-02-07	2016-02-09	2	Z93.0	Tracheostomy status	11		A41.9, J96.01, R65.20, J18.9, I50.32, E11.9, I35.0, J44.1, F41.9, I25.10, Z93.0
0043220	262508971	2016-02-07	2016-02-09	2	I25.2	Old myocardial infarction	12		A41.9, J96.01, R65.20, J18.9, I50.32, E11.9, I35.0, J44.1, F41.9, I25.10, Z93.0, I25.2
0043220	262508971	2016-02-07	2016-02-09	2	Z88.1	Allergy status to other antibiotic agents status	13		A41.9, J96.01, R65.20, J18.9, I50.32, E11.9, I35.0, J44.1, F41.9, I25.10, Z93.0, I25.2, Z88.1
0043220	262508971	2016-02-07	2016-02-09	2	Z91.041	Radiographic dye allergy status	14		A41.9, J96.01, R65.20, J18.9, I50.32, E11.9, I35.0, J44.1, F41.9, I25.10, Z93.0, I25.2, Z88.1, Z91.041
0043220	262508971	2016-02-07	2016-02-09	2	Z79.899	Other long term (current) drug therapy	15		A41.9, J96.01, R65.20, J18.9, I50.32, E11.9, I35.0, J44.1, F41.9, I25.10, Z93.0, I25.2, Z88.1, Z91.041, Z79.899
0043220	262508971	2016-02-07	2016-02-09	2	Z95.1	Presence of aortocoronary bypass graft	16		A41.9, J96.01, R65.20, J18.9, I50.32, E11.9, I35.0, J44.1, F41.9, I25.10, Z93.0, I25.2, Z88.1, Z91.041, Z79.899, Z95.1	Last
0043220	263973893	2016-03-26	2016-03-28	2	J44.1	Chronic obstructive pulmonary disease with (acute)	1	Y	J44.1
0043220	263973893	2016-03-26	2016-03-28	2	J96.21	Acute and chronic respiratory failure with hypoxia	2	Y	J44.1, J96.21
0043220	263973893	2016-03-26	2016-03-28	2	N18.4	Chronic kidney disease, stage 4 (severe)	3	Y	J44.1, J96.21, N18.4
0043220	263973893	2016-03-26	2016-03-28	2	E87.2	Acidosis	4	Y	J44.1, J96.21, N18.4, E87.2
0043220	263973893	2016-03-26	2016-03-28	2	R65.10	Systemic inflammatory response syndrome (SIRS) of	5	Y	J44.1, J96.21, N18.4, E87.2, R65.10
0043220	263973893	2016-03-26	2016-03-28	2	I50.42	Chronic combined systolic (congestive) and diastol	6	Y	J44.1, J96.21, N18.4, E87.2, R65.10, I50.42
0043220	263973893	2016-03-26	2016-03-28	2	Z99.81	Dependence on supplemental oxygen	7		J44.1, J96.21, N18.4, E87.2, R65.10, I50.42, Z99.81
0043220	263973893	2016-03-26	2016-03-28	2	E87.5	Hyperkalemia	8	Y	J44.1, J96.21, N18.4, E87.2, R65.10, I50.42, Z99.81, E87.5
0043220	263973893	2016-03-26	2016-03-28	2	E11.9	Type 2 diabetes mellitus without complications	9	Y	J44.1, J96.21, N18.4, E87.2, R65.10, I50.42, Z99.81, E87.5, E11.9
0043220	263973893	2016-03-26	2016-03-28	2	I35.0	Nonrheumatic aortic (valve) stenosis	10	Y	J44.1, J96.21, N18.4, E87.2, R65.10, I50.42, Z99.81, E87.5, E11.9, I35.0
0043220	263973893	2016-03-26	2016-03-28	2	I25.10	Atherosclerotic heart disease of native coronary a	11	Y	J44.1, J96.21, N18.4, E87.2, R65.10, I50.42, Z99.81, E87.5, E11.9, I35.0, I25.10
0043220	263973893	2016-03-26	2016-03-28	2	Z95.1	Presence of aortocoronary bypass graft	12		J44.1, J96.21, N18.4, E87.2, R65.10, I50.42, Z99.81, E87.5, E11.9, I35.0, I25.10, Z95.1
0043220	263973893	2016-03-26	2016-03-28	2	I25.2	Old myocardial infarction	13		J44.1, J96.21, N18.4, E87.2, R65.10, I50.42, Z99.81, E87.5, E11.9, I35.0, I25.10, Z95.1, I25.2
0043220	263973893	2016-03-26	2016-03-28	2	F41.9	Anxiety disorder, unspecified	14	Y	J44.1, J96.21, N18.4, E87.2, R65.10, I50.42, Z99.81, E87.5, E11.9, I35.0, I25.10, Z95.1, I25.2, F41.9	Last
0045705	263436214	2016-03-10	2016-03-16	6	G93.40	Encephalopathy, unspecified	1	Y	G93.40
0045705	263436214	2016-03-10	2016-03-16	6	A41.9	Sepsis, unspecified organism	2	Y	G93.40, A41.9
0045705	263436214	2016-03-10	2016-03-16	6	I50.33	Acute on chronic diastolic (congestive) heart fail	3	Y	G93.40, A41.9, I50.33
0045705	263436214	2016-03-10	2016-03-16	6	Z94.4	Liver transplant status	4		G93.40, A41.9, I50.33, Z94.4
0045705	263436214	2016-03-10	2016-03-16	6	N17.9	Acute kidney failure, unspecified	5	N	G93.40, A41.9, I50.33, Z94.4, N17.9
0045705	263436214	2016-03-10	2016-03-16	6	R18.8	Other ascites	6	Y	G93.40, A41.9, I50.33, Z94.4, N17.9, R18.8
0045705	263436214	2016-03-10	2016-03-16	6	E87.1	Hypo-osmolality and hyponatremia	7	Y	G93.40, A41.9, I50.33, Z94.4, N17.9, R18.8, E87.1
0045705	263436214	2016-03-10	2016-03-16	6	Z94.0	Kidney transplant status	8		G93.40, A41.9, I50.33, Z94.4, N17.9, R18.8, E87.1, Z94.0
0045705	263436214	2016-03-10	2016-03-16	6	M85.80	Other specified disorders of bone density and stru	9	Y	G93.40, A41.9, I50.33, Z94.4, N17.9, R18.8, E87.1, Z94.0, M85.80
0045705	263436214	2016-03-10	2016-03-16	6	F17.210	Nicotine dependence, cigarettes, uncomplicated	10	Y	G93.40, A41.9, I50.33, Z94.4, N17.9, R18.8, E87.1, Z94.0, M85.80, F17.210
0045705	263436214	2016-03-10	2016-03-16	6	I35.0	Nonrheumatic aortic (valve) stenosis	11	Y	G93.40, A41.9, I50.33, Z94.4, N17.9, R18.8, E87.1, Z94.0, M85.80, F17.210, I35.0
0045705	263436214	2016-03-10	2016-03-16	6	D64.9	Anemia, unspecified	12	Y	G93.40, A41.9, I50.33, Z94.4, N17.9, R18.8, E87.1, Z94.0, M85.80, F17.210, I35.0, D64.9
0045705	263436214	2016-03-10	2016-03-16	6	E78.5	Hyperlipidemia, unspecified	13	Y	G93.40, A41.9, I50.33, Z94.4, N17.9, R18.8, E87.1, Z94.0, M85.80, F17.210, I35.0, D64.9, E78.5
0045705	263436214	2016-03-10	2016-03-16	6	H91.90	Unspecified hearing loss, unspecified ear	14	Y	G93.40, A41.9, I50.33, Z94.4, N17.9, R18.8, E87.1, Z94.0, M85.80, F17.210, I35.0, D64.9, E78.5, H91.90
0045705	263436214	2016-03-10	2016-03-16	6	E11.9	Type 2 diabetes mellitus without complications	15	Y	G93.40, A41.9, I50.33, Z94.4, N17.9, R18.8, E87.1, Z94.0, M85.80, F17.210, I35.0, D64.9, E78.5, H91.90, E11.9
0045705	263436214	2016-03-10	2016-03-16	6	I10	Essential (primary) hypertension	16	Y	G93.40, A41.9, I50.33, Z94.4, N17.9, R18.8, E87.1, Z94.0, M85.80, F17.210, I35.0, D64.9, E78.5, H91.90, E11.9, I10
0045705	263436214	2016-03-10	2016-03-16	6	Z96.649	Presence of unspecified artificial hip joint	17	Y	G93.40, A41.9, I50.33, Z94.4, N17.9, R18.8, E87.1, Z94.0, M85.80, F17.210, I35.0, D64.9, E78.5, H91.90, E11.9, I10, Z96.649	Last
0048298	260514005	2015-11-24	2015-12-04	10	K26.9	Duodenal ulcer, unspecified as acute or chronic, w	1	Y	K26.9
0048298	260514005	2015-11-24	2015-12-04	10	J96.10	Chronic respiratory failure, unspecified whether w	2	Y	K26.9, J96.10
0048298	260514005	2015-11-24	2015-12-04	10	E11.649	Type 2 diabetes mellitus with hypoglycemia without	3	Y	K26.9, J96.10, E11.649
0048298	260514005	2015-11-24	2015-12-04	10	E22.2	Syndrome of inappropriate secretion of antidiureti	4	Y	K26.9, J96.10, E11.649, E22.2
0048298	260514005	2015-11-24	2015-12-04	10	Z99.81	Dependence on supplemental oxygen	5		K26.9, J96.10, E11.649, E22.2, Z99.81
0048298	260514005	2015-11-24	2015-12-04	10	F11.20	Opioid dependence, uncomplicated	6	Y	K26.9, J96.10, E11.649, E22.2, Z99.81, F11.20
0048298	260514005	2015-11-24	2015-12-04	10	E87.1	Hypo-osmolality and hyponatremia	7	Y	K26.9, J96.10, E11.649, E22.2, Z99.81, F11.20, E87.1
0048298	260514005	2015-11-24	2015-12-04	10	E83.42	Hypomagnesemia	8	Y	K26.9, J96.10, E11.649, E22.2, Z99.81, F11.20, E87.1, E83.42
0048298	260514005	2015-11-24	2015-12-04	10	K22.6	Gastro-esophageal laceration-hemorrhage syndrome	9	Y	K26.9, J96.10, E11.649, E22.2, Z99.81, F11.20, E87.1, E83.42, K22.6
0048298	260514005	2015-11-24	2015-12-04	10	J44.9	Chronic obstructive pulmonary disease, unspecified	10	Y	K26.9, J96.10, E11.649, E22.2, Z99.81, F11.20, E87.1, E83.42, K22.6, J44.9
0048298	260514005	2015-11-24	2015-12-04	10	I10	Essential (primary) hypertension	11	Y	K26.9, J96.10, E11.649, E22.2, Z99.81, F11.20, E87.1, E83.42, K22.6, J44.9, I10
0048298	260514005	2015-11-24	2015-12-04	10	K43.5	Parastomal hernia without obstruction or gangrene	12	Y	K26.9, J96.10, E11.649, E22.2, Z99.81, F11.20, E87.1, E83.42, K22.6, J44.9, I10, K43.5
0048298	260514005	2015-11-24	2015-12-04	10	I25.10	Atherosclerotic heart disease of native coronary a	13	Y	K26.9, J96.10, E11.649, E22.2, Z99.81, F11.20, E87.1, E83.42, K22.6, J44.9, I10, K43.5, I25.10
0048298	260514005	2015-11-24	2015-12-04	10	Z95.5	Presence of coronary angioplasty implant and graft	14		K26.9, J96.10, E11.649, E22.2, Z99.81, F11.20, E87.1, E83.42, K22.6, J44.9, I10, K43.5, I25.10, Z95.5
0048298	260514005	2015-11-24	2015-12-04	10	I73.9	Peripheral vascular disease, unspecified	15	Y	K26.9, J96.10, E11.649, E22.2, Z99.81, F11.20, E87.1, E83.42, K22.6, J44.9, I10, K43.5, I25.10, Z95.5, I73.9
0048298	260514005	2015-11-24	2015-12-04	10	E87.6	Hypokalemia	16	Y	K26.9, J96.10, E11.649, E22.2, Z99.81, F11.20, E87.1, E83.42, K22.6, J44.9, I10, K43.5, I25.10, Z95.5, I73.9, E87.6
0048298	260514005	2015-11-24	2015-12-04	10	G89.29	Other chronic pain	17	Y	K26.9, J96.10, E11.649, E22.2, Z99.81, F11.20, E87.1, E83.42, K22.6, J44.9, I10, K43.5, I25.10, Z95.5, I73.9, E87.6, G89.29
0048298	260514005	2015-11-24	2015-12-04	10	E78.5	Hyperlipidemia, unspecified	18	Y	K26.9, J96.10, E11.649, E22.2, Z99.81, F11.20, E87.1, E83.42, K22.6, J44.9, I10, K43.5, I25.10, Z95.5, I73.9, E87.6, G89.29, E78.5
0048298	260514005	2015-11-24	2015-12-04	10	M79.7	Fibromyalgia	19	Y	K26.9, J96.10, E11.649, E22.2, Z99.81, F11.20, E87.1, E83.42, K22.6, J44.9, I10, K43.5, I25.10, Z95.5, I73.9, E87.6, G89.29, E78.5, M79.7
0048298	260514005	2015-11-24	2015-12-04	10	F41.9	Anxiety disorder, unspecified	20	Y	K26.9, J96.10, E11.649, E22.2, Z99.81, F11.20, E87.1, E83.42, K22.6, J44.9, I10, K43.5, I25.10, Z95.5, I73.9, E87.6, G89.29, E78.5, M79.7, F41.9
0048298	260514005	2015-11-24	2015-12-04	10	K44.9	Diaphragmatic hernia without obstruction or gangre	21	Y	K26.9, J96.10, E11.649, E22.2, Z99.81, F11.20, E87.1, E83.42, K22.6, J44.9, I10, K43.5, I25.10, Z95.5, I73.9, E87.6, G89.29, E78.5, M79.7, F41.9, K44.9
0048298	260514005	2015-11-24	2015-12-04	10	Z79.891	Long term (current) use of opiate analgesic	22		K26.9, J96.10, E11.649, E22.2, Z99.81, F11.20, E87.1, E83.42, K22.6, J44.9, I10, K43.5, I25.10, Z95.5, I73.9, E87.6, G89.29, E78.5, M79.7, F41.9, K44.9, Z79.891
0048298	260514005	2015-11-24	2015-12-04	10	Z93.2	Ileostomy status	23		K26.9, J96.10, E11.649, E22.2, Z99.81, F11.20, E87.1, E83.42, K22.6, J44.9, I10, K43.5, I25.10, Z95.5, I73.9, E87.6, G89.29, E78.5, M79.7, F41.9, K44.9, Z79.891, Z93.2
0048298	260514005	2015-11-24	2015-12-04	10	Z86.73	Personal history of transient ischemic attack (TIA	24		K26.9, J96.10, E11.649, E22.2, Z99.81, F11.20, E87.1, E83.42, K22.6, J44.9, I10, K43.5, I25.10, Z95.5, I73.9, E87.6, G89.29, E78.5, M79.7, F41.9, K44.9, Z79.891, Z93.2, Z86.73
0048298	260514005	2015-11-24	2015-12-04	10	Z85.038	Personal history of other malignant neoplasm of la	25		K26.9, J96.10, E11.649, E22.2, Z99.81, F11.20, E87.1, E83.42, K22.6, J44.9, I10, K43.5, I25.10, Z95.5, I73.9, E87.6, G89.29, E78.5, M79.7, F41.9, K44.9, Z79.891, Z93.2, Z86.73, Z85.038
0048298	260514005	2015-11-24	2015-12-04	10	M54.5	Low back pain	26	Y	K26.9, J96.10, E11.649, E22.2, Z99.81, F11.20, E87.1, E83.42, K22.6, J44.9, I10, K43.5, I25.10, Z95.5, I73.9, E87.6, G89.29, E78.5, M79.7, F41.9, K44.9, Z79.891, Z93.2, Z86.73, Z85.038, M54.5
0048298	260514005	2015-11-24	2015-12-04	10	F40.240	Claustrophobia	27	Y	K26.9, J96.10, E11.649, E22.2, Z99.81, F11.20, E87.1, E83.42, K22.6, J44.9, I10, K43.5, I25.10, Z95.5, I73.9, E87.6, G89.29, E78.5, M79.7, F41.9, K44.9, Z79.891, Z93.2, Z86.73, Z85.038, M54.5, F40.240
0048298	260514005	2015-11-24	2015-12-04	10	M43.16	Spondylolisthesis, lumbar region	28	Y	K26.9, J96.10, E11.649, E22.2, Z99.81, F11.20, E87.1, E83.42, K22.6, J44.9, I10, K43.5, I25.10, Z95.5, I73.9, E87.6, G89.29, E78.5, M79.7, F41.9, K44.9, Z79.891, Z93.2, Z86.73, Z85.038, M54.5, F40.240, M43.16	Last
0048298	263562563	2016-03-13	2016-03-18	5	K92.2	Gastrointestinal hemorrhage, unspecified	1	Y	K92.2
0048298	263562563	2016-03-13	2016-03-18	5	E46	Unspecified protein-calorie malnutrition	2	Y	K92.2, E46
0048298	263562563	2016-03-13	2016-03-18	5	E87.1	Hypo-osmolality and hyponatremia	3	Y	K92.2, E46, E87.1
0048298	263562563	2016-03-13	2016-03-18	5	K31.84	Gastroparesis	4	Y	K92.2, E46, E87.1, K31.84
0048298	263562563	2016-03-13	2016-03-18	5	N32.81	Overactive bladder	5	Y	K92.2, E46, E87.1, K31.84, N32.81
0048298	263562563	2016-03-13	2016-03-18	5	K25.9	Gastric ulcer, unspecified as acute or chronic, wi	6	Y	K92.2, E46, E87.1, K31.84, N32.81, K25.9
0048298	263562563	2016-03-13	2016-03-18	5	I10	Essential (primary) hypertension	7	Y	K92.2, E46, E87.1, K31.84, N32.81, K25.9, I10
0048298	263562563	2016-03-13	2016-03-18	5	J44.9	Chronic obstructive pulmonary disease, unspecified	8	Y	K92.2, E46, E87.1, K31.84, N32.81, K25.9, I10, J44.9
0048298	263562563	2016-03-13	2016-03-18	5	E11.9	Type 2 diabetes mellitus without complications	9	Y	K92.2, E46, E87.1, K31.84, N32.81, K25.9, I10, J44.9, E11.9
0048298	263562563	2016-03-13	2016-03-18	5	D50.9	Iron deficiency anemia, unspecified	10	Y	K92.2, E46, E87.1, K31.84, N32.81, K25.9, I10, J44.9, E11.9, D50.9
0048298	263562563	2016-03-13	2016-03-18	5	K64.8	Other hemorrhoids	11	Y	K92.2, E46, E87.1, K31.84, N32.81, K25.9, I10, J44.9, E11.9, D50.9, K64.8
0048298	263562563	2016-03-13	2016-03-18	5	E78.5	Hyperlipidemia, unspecified	12	Y	K92.2, E46, E87.1, K31.84, N32.81, K25.9, I10, J44.9, E11.9, D50.9, K64.8, E78.5
0048298	263562563	2016-03-13	2016-03-18	5	K29.80	Duodenitis without bleeding	13	Y	K92.2, E46, E87.1, K31.84, N32.81, K25.9, I10, J44.9, E11.9, D50.9, K64.8, E78.5, K29.80
0048298	263562563	2016-03-13	2016-03-18	5	M79.7	Fibromyalgia	14	Y	K92.2, E46, E87.1, K31.84, N32.81, K25.9, I10, J44.9, E11.9, D50.9, K64.8, E78.5, K29.80, M79.7
0048298	263562563	2016-03-13	2016-03-18	5	I25.10	Atherosclerotic heart disease of native coronary a	15	Y	K92.2, E46, E87.1, K31.84, N32.81, K25.9, I10, J44.9, E11.9, D50.9, K64.8, E78.5, K29.80, M79.7, I25.10
0048298	263562563	2016-03-13	2016-03-18	5	M85.80	Other specified disorders of bone density and stru	16	Y	K92.2, E46, E87.1, K31.84, N32.81, K25.9, I10, J44.9, E11.9, D50.9, K64.8, E78.5, K29.80, M79.7, I25.10, M85.80
0048298	263562563	2016-03-13	2016-03-18	5	K29.70	Gastritis, unspecified, without bleeding	17	Y	K92.2, E46, E87.1, K31.84, N32.81, K25.9, I10, J44.9, E11.9, D50.9, K64.8, E78.5, K29.80, M79.7, I25.10, M85.80, K29.70
0048298	263562563	2016-03-13	2016-03-18	5	K21.9	Gastro-esophageal reflux disease without esophagit	18	Y	K92.2, E46, E87.1, K31.84, N32.81, K25.9, I10, J44.9, E11.9, D50.9, K64.8, E78.5, K29.80, M79.7, I25.10, M85.80, K29.70, K21.9
0048298	263562563	2016-03-13	2016-03-18	5	G47.33	Obstructive sleep apnea (adult) (pediatric)	19	Y	K92.2, E46, E87.1, K31.84, N32.81, K25.9, I10, J44.9, E11.9, D50.9, K64.8, E78.5, K29.80, M79.7, I25.10, M85.80, K29.70, K21.9, G47.33
0048298	263562563	2016-03-13	2016-03-18	5	R63.1	Polydipsia	20	Y	K92.2, E46, E87.1, K31.84, N32.81, K25.9, I10, J44.9, E11.9, D50.9, K64.8, E78.5, K29.80, M79.7, I25.10, M85.80, K29.70, K21.9, G47.33, R63.1
0048298	263562563	2016-03-13	2016-03-18	5	M62.81	Muscle weakness (generalized)	21	Y	K92.2, E46, E87.1, K31.84, N32.81, K25.9, I10, J44.9, E11.9, D50.9, K64.8, E78.5, K29.80, M79.7, I25.10, M85.80, K29.70, K21.9, G47.33, R63.1, M62.81
0048298	263562563	2016-03-13	2016-03-18	5	W19.XXXA	Unspecified fall, initial encounter	22	Y	K92.2, E46, E87.1, K31.84, N32.81, K25.9, I10, J44.9, E11.9, D50.9, K64.8, E78.5, K29.80, M79.7, I25.10, M85.80, K29.70, K21.9, G47.33, R63.1, M62.81, W19.XXXA
0048298	263562563	2016-03-13	2016-03-18	5	Z85.038	Personal history of other malignant neoplasm of la	23		K92.2, E46, E87.1, K31.84, N32.81, K25.9, I10, J44.9, E11.9, D50.9, K64.8, E78.5, K29.80, M79.7, I25.10, M85.80, K29.70, K21.9, G47.33, R63.1, M62.81, W19.XXXA, Z85.038
0048298	263562563	2016-03-13	2016-03-18	5	Z85.118	Personal history of other malignant neoplasm of br	24		K92.2, E46, E87.1, K31.84, N32.81, K25.9, I10, J44.9, E11.9, D50.9, K64.8, E78.5, K29.80, M79.7, I25.10, M85.80, K29.70, K21.9, G47.33, R63.1, M62.81, W19.XXXA, Z85.038, Z85.118
0048298	263562563	2016-03-13	2016-03-18	5	Z93.2	Ileostomy status	25		K92.2, E46, E87.1, K31.84, N32.81, K25.9, I10, J44.9, E11.9, D50.9, K64.8, E78.5, K29.80, M79.7, I25.10, M85.80, K29.70, K21.9, G47.33, R63.1, M62.81, W19.XXXA, Z85.038, Z85.118, Z93.2
0048298	263562563	2016-03-13	2016-03-18	5	Z90.49	Acquired absence of other specified parts of diges	26	Y	K92.2, E46, E87.1, K31.84, N32.81, K25.9, I10, J44.9, E11.9, D50.9, K64.8, E78.5, K29.80, M79.7, I25.10, M85.80, K29.70, K21.9, G47.33, R63.1, M62.81, W19.XXXA, Z85.038, Z85.118, Z93.2, Z90.49
0048298	263562563	2016-03-13	2016-03-18	5	Z87.891	Personal history of nicotine dependence	27		K92.2, E46, E87.1, K31.84, N32.81, K25.9, I10, J44.9, E11.9, D50.9, K64.8, E78.5, K29.80, M79.7, I25.10, M85.80, K29.70, K21.9, G47.33, R63.1, M62.81, W19.XXXA, Z85.038, Z85.118, Z93.2, Z90.49, Z87.891
0048298	263562563	2016-03-13	2016-03-18	5	Z85.048	Personal history of other malignant neoplasm of re	28		K92.2, E46, E87.1, K31.84, N32.81, K25.9, I10, J44.9, E11.9, D50.9, K64.8, E78.5, K29.80, M79.7, I25.10, M85.80, K29.70, K21.9, G47.33, R63.1, M62.81, W19.XXXA, Z85.038, Z85.118, Z93.2, Z90.49, Z87.891, Z85.048
0048298	263562563	2016-03-13	2016-03-18	5	Z87.11	Personal history of peptic ulcer disease	29		K92.2, E46, E87.1, K31.84, N32.81, K25.9, I10, J44.9, E11.9, D50.9, K64.8, E78.5, K29.80, M79.7, I25.10, M85.80, K29.70, K21.9, G47.33, R63.1, M62.81, W19.XXXA, Z85.038, Z85.118, Z93.2, Z90.49, Z87.891, Z85.048, Z87.11
0048298	263562563	2016-03-13	2016-03-18	5	Z79.891	Long term (current) use of opiate analgesic	30		K92.2, E46, E87.1, K31.84, N32.81, K25.9, I10, J44.9, E11.9, D50.9, K64.8, E78.5, K29.80, M79.7, I25.10, M85.80, K29.70, K21.9, G47.33, R63.1, M62.81, W19.XXXA, Z85.038, Z85.118, Z93.2, Z90.49, Z87.891, Z85.048, Z87.11, Z79.891	Last
0049994	259012540	2015-10-05	2015-10-13	8	A41.9	Sepsis, unspecified organism	1	Y	A41.9
0049994	259012540	2015-10-05	2015-10-13	8	J96.22	Acute and chronic respiratory failure with hyperca	2	Y	A41.9, J96.22
0049994	259012540	2015-10-05	2015-10-13	8	N17.0	Acute kidney failure with tubular necrosis	3	Y	A41.9, J96.22, N17.0
0049994	259012540	2015-10-05	2015-10-13	8	I50.31	Acute diastolic (congestive) heart failure	4	Y	A41.9, J96.22, N17.0, I50.31
0049994	259012540	2015-10-05	2015-10-13	8	J18.9	Pneumonia, unspecified organism	5	Y	A41.9, J96.22, N17.0, I50.31, J18.9
0049994	259012540	2015-10-05	2015-10-13	8	L89.321	Pressure ulcer of left buttock, stage 1	6	Y	A41.9, J96.22, N17.0, I50.31, J18.9, L89.321
0049994	259012540	2015-10-05	2015-10-13	8	L89.151	Pressure ulcer of sacral region, stage 1	7	Y	A41.9, J96.22, N17.0, I50.31, J18.9, L89.321, L89.151
0049994	259012540	2015-10-05	2015-10-13	8	R65.20	Severe sepsis without septic shock	8	Y	A41.9, J96.22, N17.0, I50.31, J18.9, L89.321, L89.151, R65.20
0049994	259012540	2015-10-05	2015-10-13	8	E87.2	Acidosis	9	Y	A41.9, J96.22, N17.0, I50.31, J18.9, L89.321, L89.151, R65.20, E87.2
0049994	259012540	2015-10-05	2015-10-13	8	N39.0	Urinary tract infection, site not specified	10	Y	A41.9, J96.22, N17.0, I50.31, J18.9, L89.321, L89.151, R65.20, E87.2, N39.0
0049994	259012540	2015-10-05	2015-10-13	8	Z68.43	Body mass index (BMI) 50-59.9 , adult	11		A41.9, J96.22, N17.0, I50.31, J18.9, L89.321, L89.151, R65.20, E87.2, N39.0, Z68.43
0049994	259012540	2015-10-05	2015-10-13	8	J44.1	Chronic obstructive pulmonary disease with (acute)	12	Y	A41.9, J96.22, N17.0, I50.31, J18.9, L89.321, L89.151, R65.20, E87.2, N39.0, Z68.43, J44.1
0049994	259012540	2015-10-05	2015-10-13	8	I25.10	Atherosclerotic heart disease of native coronary a	13	Y	A41.9, J96.22, N17.0, I50.31, J18.9, L89.321, L89.151, R65.20, E87.2, N39.0, Z68.43, J44.1, I25.10
0049994	259012540	2015-10-05	2015-10-13	8	E66.01	Morbid (severe) obesity due to excess calories	14	Y	A41.9, J96.22, N17.0, I50.31, J18.9, L89.321, L89.151, R65.20, E87.2, N39.0, Z68.43, J44.1, I25.10, E66.01
0049994	259012540	2015-10-05	2015-10-13	8	B96.4	Proteus (mirabilis) (morganii) as the cause of dis	15	Y	A41.9, J96.22, N17.0, I50.31, J18.9, L89.321, L89.151, R65.20, E87.2, N39.0, Z68.43, J44.1, I25.10, E66.01, B96.4
0049994	259012540	2015-10-05	2015-10-13	8	E87.6	Hypokalemia	16	Y	A41.9, J96.22, N17.0, I50.31, J18.9, L89.321, L89.151, R65.20, E87.2, N39.0, Z68.43, J44.1, I25.10, E66.01, B96.4, E87.6
0049994	259012540	2015-10-05	2015-10-13	8	K59.00	Constipation, unspecified	17	Y	A41.9, J96.22, N17.0, I50.31, J18.9, L89.321, L89.151, R65.20, E87.2, N39.0, Z68.43, J44.1, I25.10, E66.01, B96.4, E87.6, K59.00
0049994	259012540	2015-10-05	2015-10-13	8	B96.20	Unspecified Escherichia coli E. coli as the cause	18	Y	A41.9, J96.22, N17.0, I50.31, J18.9, L89.321, L89.151, R65.20, E87.2, N39.0, Z68.43, J44.1, I25.10, E66.01, B96.4, E87.6, K59.00, B96.20
0049994	259012540	2015-10-05	2015-10-13	8	I12.9	Hypertensive chronic kidney disease with stage 1 t	19	Y	A41.9, J96.22, N17.0, I50.31, J18.9, L89.321, L89.151, R65.20, E87.2, N39.0, Z68.43, J44.1, I25.10, E66.01, B96.4, E87.6, K59.00, B96.20, I12.9
0049994	259012540	2015-10-05	2015-10-13	8	N18.9	Chronic kidney disease, unspecified	20	Y	A41.9, J96.22, N17.0, I50.31, J18.9, L89.321, L89.151, R65.20, E87.2, N39.0, Z68.43, J44.1, I25.10, E66.01, B96.4, E87.6, K59.00, B96.20, I12.9, N18.9
0049994	259012540	2015-10-05	2015-10-13	8	Z79.899	Other long term (current) drug therapy	21		A41.9, J96.22, N17.0, I50.31, J18.9, L89.321, L89.151, R65.20, E87.2, N39.0, Z68.43, J44.1, I25.10, E66.01, B96.4, E87.6, K59.00, B96.20, I12.9, N18.9, Z79.899
0049994	259012540	2015-10-05	2015-10-13	8	Z79.82	Long term (current) use of aspirin	22		A41.9, J96.22, N17.0, I50.31, J18.9, L89.321, L89.151, R65.20, E87.2, N39.0, Z68.43, J44.1, I25.10, E66.01, B96.4, E87.6, K59.00, B96.20, I12.9, N18.9, Z79.899, Z79.82
0049994	259012540	2015-10-05	2015-10-13	8	Z95.5	Presence of coronary angioplasty implant and graft	23		A41.9, J96.22, N17.0, I50.31, J18.9, L89.321, L89.151, R65.20, E87.2, N39.0, Z68.43, J44.1, I25.10, E66.01, B96.4, E87.6, K59.00, B96.20, I12.9, N18.9, Z79.899, Z79.82, Z95.5
0049994	259012540	2015-10-05	2015-10-13	8	Z99.81	Dependence on supplemental oxygen	24		A41.9, J96.22, N17.0, I50.31, J18.9, L89.321, L89.151, R65.20, E87.2, N39.0, Z68.43, J44.1, I25.10, E66.01, B96.4, E87.6, K59.00, B96.20, I12.9, N18.9, Z79.899, Z79.82, Z95.5, Z99.81
0049994	259012540	2015-10-05	2015-10-13	8	Z87.891	Personal history of nicotine dependence	25		A41.9, J96.22, N17.0, I50.31, J18.9, L89.321, L89.151, R65.20, E87.2, N39.0, Z68.43, J44.1, I25.10, E66.01, B96.4, E87.6, K59.00, B96.20, I12.9, N18.9, Z79.899, Z79.82, Z95.5, Z99.81, Z87.891
0049994	259012540	2015-10-05	2015-10-13	8	Z88.0	Allergy status to penicillin	26		A41.9, J96.22, N17.0, I50.31, J18.9, L89.321, L89.151, R65.20, E87.2, N39.0, Z68.43, J44.1, I25.10, E66.01, B96.4, E87.6, K59.00, B96.20, I12.9, N18.9, Z79.899, Z79.82, Z95.5, Z99.81, Z87.891, Z88.0
0049994	259012540	2015-10-05	2015-10-13	8	Z88.1	Allergy status to other antibiotic agents status	27		A41.9, J96.22, N17.0, I50.31, J18.9, L89.321, L89.151, R65.20, E87.2, N39.0, Z68.43, J44.1, I25.10, E66.01, B96.4, E87.6, K59.00, B96.20, I12.9, N18.9, Z79.899, Z79.82, Z95.5, Z99.81, Z87.891, Z88.0, Z88.1
0049994	259012540	2015-10-05	2015-10-13	8	Z88.2	Allergy status to sulfonamides status	28		A41.9, J96.22, N17.0, I50.31, J18.9, L89.321, L89.151, R65.20, E87.2, N39.0, Z68.43, J44.1, I25.10, E66.01, B96.4, E87.6, K59.00, B96.20, I12.9, N18.9, Z79.899, Z79.82, Z95.5, Z99.81, Z87.891, Z88.0, Z88.1, Z88.2	Last
0049994	262754013	2016-02-16	2016-02-26	10	J96.21	Acute and chronic respiratory failure with hypoxia	1	Y	J96.21
0049994	262754013	2016-02-16	2016-02-26	10	J18.9	Pneumonia, unspecified organism	2	Y	J96.21, J18.9
0049994	262754013	2016-02-16	2016-02-26	10	N17.9	Acute kidney failure, unspecified	3	N	J96.21, J18.9, N17.9
0049994	262754013	2016-02-16	2016-02-26	10	I50.33	Acute on chronic diastolic (congestive) heart fail	4	Y	J96.21, J18.9, N17.9, I50.33
0049994	262754013	2016-02-16	2016-02-26	10	L03.116	Cellulitis of left lower limb	5	Y	J96.21, J18.9, N17.9, I50.33, L03.116
0049994	262754013	2016-02-16	2016-02-26	10	N18.3	Chronic kidney disease, stage 3 (moderate)	6	Y	J96.21, J18.9, N17.9, I50.33, L03.116, N18.3
0049994	262754013	2016-02-16	2016-02-26	10	E87.3	Alkalosis	7	Y	J96.21, J18.9, N17.9, I50.33, L03.116, N18.3, E87.3
0049994	262754013	2016-02-16	2016-02-26	10	J44.1	Chronic obstructive pulmonary disease with (acute)	8	Y	J96.21, J18.9, N17.9, I50.33, L03.116, N18.3, E87.3, J44.1
0049994	262754013	2016-02-16	2016-02-26	10	Z68.42	Body mass index (BMI) 45.0-49.9, adult	9		J96.21, J18.9, N17.9, I50.33, L03.116, N18.3, E87.3, J44.1, Z68.42
0049994	262754013	2016-02-16	2016-02-26	10	E87.5	Hyperkalemia	10	N	J96.21, J18.9, N17.9, I50.33, L03.116, N18.3, E87.3, J44.1, Z68.42, E87.5
0049994	262754013	2016-02-16	2016-02-26	10	Z66	Do not resuscitate	11	N	J96.21, J18.9, N17.9, I50.33, L03.116, N18.3, E87.3, J44.1, Z68.42, E87.5, Z66
0049994	262754013	2016-02-16	2016-02-26	10	D63.1	Anemia in chronic kidney disease	12	Y	J96.21, J18.9, N17.9, I50.33, L03.116, N18.3, E87.3, J44.1, Z68.42, E87.5, Z66, D63.1
0049994	262754013	2016-02-16	2016-02-26	10	I12.9	Hypertensive chronic kidney disease with stage 1 t	13	Y	J96.21, J18.9, N17.9, I50.33, L03.116, N18.3, E87.3, J44.1, Z68.42, E87.5, Z66, D63.1, I12.9
0049994	262754013	2016-02-16	2016-02-26	10	I25.10	Atherosclerotic heart disease of native coronary a	14	Y	J96.21, J18.9, N17.9, I50.33, L03.116, N18.3, E87.3, J44.1, Z68.42, E87.5, Z66, D63.1, I12.9, I25.10
0049994	262754013	2016-02-16	2016-02-26	10	R23.0	Cyanosis	15	Y	J96.21, J18.9, N17.9, I50.33, L03.116, N18.3, E87.3, J44.1, Z68.42, E87.5, Z66, D63.1, I12.9, I25.10, R23.0
0049994	262754013	2016-02-16	2016-02-26	10	G47.33	Obstructive sleep apnea (adult) (pediatric)	16	Y	J96.21, J18.9, N17.9, I50.33, L03.116, N18.3, E87.3, J44.1, Z68.42, E87.5, Z66, D63.1, I12.9, I25.10, R23.0, G47.33
0049994	262754013	2016-02-16	2016-02-26	10	H57.02	Anisocoria	17	Y	J96.21, J18.9, N17.9, I50.33, L03.116, N18.3, E87.3, J44.1, Z68.42, E87.5, Z66, D63.1, I12.9, I25.10, R23.0, G47.33, H57.02
0049994	262754013	2016-02-16	2016-02-26	10	K59.00	Constipation, unspecified	18	Y	J96.21, J18.9, N17.9, I50.33, L03.116, N18.3, E87.3, J44.1, Z68.42, E87.5, Z66, D63.1, I12.9, I25.10, R23.0, G47.33, H57.02, K59.00
0049994	262754013	2016-02-16	2016-02-26	10	E66.9	Obesity, unspecified	19	Y	J96.21, J18.9, N17.9, I50.33, L03.116, N18.3, E87.3, J44.1, Z68.42, E87.5, Z66, D63.1, I12.9, I25.10, R23.0, G47.33, H57.02, K59.00, E66.9
0049994	262754013	2016-02-16	2016-02-26	10	Y95	Nosocomial condition	20	Y	J96.21, J18.9, N17.9, I50.33, L03.116, N18.3, E87.3, J44.1, Z68.42, E87.5, Z66, D63.1, I12.9, I25.10, R23.0, G47.33, H57.02, K59.00, E66.9, Y95
0049994	262754013	2016-02-16	2016-02-26	10	Z87.891	Personal history of nicotine dependence	21		J96.21, J18.9, N17.9, I50.33, L03.116, N18.3, E87.3, J44.1, Z68.42, E87.5, Z66, D63.1, I12.9, I25.10, R23.0, G47.33, H57.02, K59.00, E66.9, Y95, Z87.891
0049994	262754013	2016-02-16	2016-02-26	10	Z91.19	Patients noncompliance with other medical treatmen	22	N	J96.21, J18.9, N17.9, I50.33, L03.116, N18.3, E87.3, J44.1, Z68.42, E87.5, Z66, D63.1, I12.9, I25.10, R23.0, G47.33, H57.02, K59.00, E66.9, Y95, Z87.891, Z91.19	Last
0050375	259005676	2015-10-03	2015-10-08	5	N17.9	Acute kidney failure, unspecified	1	Y	N17.9
0050375	259005676	2015-10-03	2015-10-08	5	E87.0	Hyperosmolality and hypernatremia	2	Y	N17.9, E87.0
0050375	259005676	2015-10-03	2015-10-08	5	E87.2	Acidosis	3	Y	N17.9, E87.0, E87.2
0050375	259005676	2015-10-03	2015-10-08	5	N13.8	Other obstructive and reflux uropathy	4	Y	N17.9, E87.0, E87.2, N13.8
0050375	259005676	2015-10-03	2015-10-08	5	I12.0	Hypertensive chronic kidney disease with stage 5 c	5	Y	N17.9, E87.0, E87.2, N13.8, I12.0
0050375	259005676	2015-10-03	2015-10-08	5	N39.0	Urinary tract infection, site not specified	6	Y	N17.9, E87.0, E87.2, N13.8, I12.0, N39.0
0050375	259005676	2015-10-03	2015-10-08	5	N13.30	Unspecified hydronephrosis	7	Y	N17.9, E87.0, E87.2, N13.8, I12.0, N39.0, N13.30
0050375	259005676	2015-10-03	2015-10-08	5	N18.6	End stage renal disease	8	Y	N17.9, E87.0, E87.2, N13.8, I12.0, N39.0, N13.30, N18.6
0050375	259005676	2015-10-03	2015-10-08	5	E87.6	Hypokalemia	9	Y	N17.9, E87.0, E87.2, N13.8, I12.0, N39.0, N13.30, N18.6, E87.6
0050375	259005676	2015-10-03	2015-10-08	5	D63.1	Anemia in chronic kidney disease	10	Y	N17.9, E87.0, E87.2, N13.8, I12.0, N39.0, N13.30, N18.6, E87.6, D63.1
0050375	259005676	2015-10-03	2015-10-08	5	I73.9	Peripheral vascular disease, unspecified	11	Y	N17.9, E87.0, E87.2, N13.8, I12.0, N39.0, N13.30, N18.6, E87.6, D63.1, I73.9
0050375	259005676	2015-10-03	2015-10-08	5	B95.2	Enterococcus as the cause of diseases classified e	12	Y	N17.9, E87.0, E87.2, N13.8, I12.0, N39.0, N13.30, N18.6, E87.6, D63.1, I73.9, B95.2
0050375	259005676	2015-10-03	2015-10-08	5	Z85.51	Personal history of malignant neoplasm of bladder	13		N17.9, E87.0, E87.2, N13.8, I12.0, N39.0, N13.30, N18.6, E87.6, D63.1, I73.9, B95.2, Z85.51
0050375	259005676	2015-10-03	2015-10-08	5	F17.210	Nicotine dependence, cigarettes, uncomplicated	14	Y	N17.9, E87.0, E87.2, N13.8, I12.0, N39.0, N13.30, N18.6, E87.6, D63.1, I73.9, B95.2, Z85.51, F17.210
0050375	259005676	2015-10-03	2015-10-08	5	E87.5	Hyperkalemia	15	Y	N17.9, E87.0, E87.2, N13.8, I12.0, N39.0, N13.30, N18.6, E87.6, D63.1, I73.9, B95.2, Z85.51, F17.210, E87.5
0050375	259005676	2015-10-03	2015-10-08	5	Z66	Do not resuscitate	16	Y	N17.9, E87.0, E87.2, N13.8, I12.0, N39.0, N13.30, N18.6, E87.6, D63.1, I73.9, B95.2, Z85.51, F17.210, E87.5, Z66	Last
0053160	263539686	2016-03-11	2016-03-15	4	K92.1	Melena	1	Y	K92.1
0053160	263539686	2016-03-11	2016-03-15	4	D62	Acute posthemorrhagic anemia	2	Y	K92.1, D62
0053160	263539686	2016-03-11	2016-03-15	4	K22.70	Barretts esophagus without dysplasia	3	Y	K92.1, D62, K22.70
0053160	263539686	2016-03-11	2016-03-15	4	K44.9	Diaphragmatic hernia without obstruction or gangre	4	Y	K92.1, D62, K22.70, K44.9
0053160	263539686	2016-03-11	2016-03-15	4	K20.9	Esophagitis, unspecified	5	Y	K92.1, D62, K22.70, K44.9, K20.9
0053160	263539686	2016-03-11	2016-03-15	4	J45.909	Unspecified asthma, uncomplicated	6	Y	K92.1, D62, K22.70, K44.9, K20.9, J45.909	Last
0057002	261132492	2015-12-17	2015-12-19	2	N13.1	Hydronephrosis with ureteral stricture, not elsewh	1	Y	N13.1
0057002	261132492	2015-12-17	2015-12-19	2	N17.9	Acute kidney failure, unspecified	2	Y	N13.1, N17.9
0057002	261132492	2015-12-17	2015-12-19	2	E87.2	Acidosis	3	Y	N13.1, N17.9, E87.2
0057002	261132492	2015-12-17	2015-12-19	2	Q60.0	Renal agenesis, unilateral	4		N13.1, N17.9, E87.2, Q60.0
0057002	261132492	2015-12-17	2015-12-19	2	I12.0	Hypertensive chronic kidney disease with stage 5 c	5	Y	N13.1, N17.9, E87.2, Q60.0, I12.0
0057002	261132492	2015-12-17	2015-12-19	2	N18.6	End stage renal disease	6	Y	N13.1, N17.9, E87.2, Q60.0, I12.0, N18.6
0057002	261132492	2015-12-17	2015-12-19	2	E87.5	Hyperkalemia	7	Y	N13.1, N17.9, E87.2, Q60.0, I12.0, N18.6, E87.5
0057002	261132492	2015-12-17	2015-12-19	2	D53.9	Nutritional anemia, unspecified	8	Y	N13.1, N17.9, E87.2, Q60.0, I12.0, N18.6, E87.5, D53.9
0057002	261132492	2015-12-17	2015-12-19	2	E78.5	Hyperlipidemia, unspecified	9	Y	N13.1, N17.9, E87.2, Q60.0, I12.0, N18.6, E87.5, D53.9, E78.5
0057002	261132492	2015-12-17	2015-12-19	2	J44.9	Chronic obstructive pulmonary disease, unspecified	10	Y	N13.1, N17.9, E87.2, Q60.0, I12.0, N18.6, E87.5, D53.9, E78.5, J44.9
0057002	261132492	2015-12-17	2015-12-19	2	Z90.5	Acquired absence of kidney	11	Y	N13.1, N17.9, E87.2, Q60.0, I12.0, N18.6, E87.5, D53.9, E78.5, J44.9, Z90.5
0057002	261132492	2015-12-17	2015-12-19	2	I34.0	Nonrheumatic mitral (valve) insufficiency	12	Y	N13.1, N17.9, E87.2, Q60.0, I12.0, N18.6, E87.5, D53.9, E78.5, J44.9, Z90.5, I34.0
0057002	261132492	2015-12-17	2015-12-19	2	Z99.2	Dependence on renal dialysis	13		N13.1, N17.9, E87.2, Q60.0, I12.0, N18.6, E87.5, D53.9, E78.5, J44.9, Z90.5, I34.0, Z99.2
0057002	261132492	2015-12-17	2015-12-19	2	Z88.5	Allergy status to narcotic agent status	14		N13.1, N17.9, E87.2, Q60.0, I12.0, N18.6, E87.5, D53.9, E78.5, J44.9, Z90.5, I34.0, Z99.2, Z88.5
0057002	261132492	2015-12-17	2015-12-19	2	Z87.891	Personal history of nicotine dependence	15		N13.1, N17.9, E87.2, Q60.0, I12.0, N18.6, E87.5, D53.9, E78.5, J44.9, Z90.5, I34.0, Z99.2, Z88.5, Z87.891
0057002	261132492	2015-12-17	2015-12-19	2	Z85.3	Personal history of malignant neoplasm of breast	16		N13.1, N17.9, E87.2, Q60.0, I12.0, N18.6, E87.5, D53.9, E78.5, J44.9, Z90.5, I34.0, Z99.2, Z88.5, Z87.891, Z85.3	Last
0060484	261954010	2016-01-19	2016-01-21	2	I50.33	Acute on chronic diastolic (congestive) heart fail	1	Y	I50.33
0060484	261954010	2016-01-19	2016-01-21	2	J96.01	Acute respiratory failure with hypoxia	2	Y	I50.33, J96.01
0060484	261954010	2016-01-19	2016-01-21	2	I48.2	Chronic atrial fibrillation	3	Y	I50.33, J96.01, I48.2
0060484	261954010	2016-01-19	2016-01-21	2	Z66	Do not resuscitate	4	N	I50.33, J96.01, I48.2, Z66
0060484	261954010	2016-01-19	2016-01-21	2	I10	Essential (primary) hypertension	5	Y	I50.33, J96.01, I48.2, Z66, I10
0060484	261954010	2016-01-19	2016-01-21	2	E78.5	Hyperlipidemia, unspecified	6	Y	I50.33, J96.01, I48.2, Z66, I10, E78.5
0060484	261954010	2016-01-19	2016-01-21	2	Z91.81	History of falling	7		I50.33, J96.01, I48.2, Z66, I10, E78.5, Z91.81
0060484	261954010	2016-01-19	2016-01-21	2	Z86.73	Personal history of transient ischemic attack (TIA	8		I50.33, J96.01, I48.2, Z66, I10, E78.5, Z91.81, Z86.73	Last
0064430	260815014	2015-12-07	2015-12-10	3	I50.33	Acute on chronic diastolic (congestive) heart fail	1	Y	I50.33
0064430	260815014	2015-12-07	2015-12-10	3	E87.2	Acidosis	2	Y	I50.33, E87.2
0064430	260815014	2015-12-07	2015-12-10	3	E11.649	Type 2 diabetes mellitus with hypoglycemia without	3	Y	I50.33, E87.2, E11.649
0064430	260815014	2015-12-07	2015-12-10	3	N17.9	Acute kidney failure, unspecified	4	Y	I50.33, E87.2, E11.649, N17.9
0064430	260815014	2015-12-07	2015-12-10	3	Z68.41	Body mass index (BMI) 40.0-44.9, adult	5		I50.33, E87.2, E11.649, N17.9, Z68.41
0064430	260815014	2015-12-07	2015-12-10	3	N18.3	Chronic kidney disease, stage 3 (moderate)	6	Y	I50.33, E87.2, E11.649, N17.9, Z68.41, N18.3
0064430	260815014	2015-12-07	2015-12-10	3	I24.8	Other forms of acute ischemic heart disease	7	Y	I50.33, E87.2, E11.649, N17.9, Z68.41, N18.3, I24.8
0064430	260815014	2015-12-07	2015-12-10	3	I07.1	Rheumatic tricuspid insufficiency	8	Y	I50.33, E87.2, E11.649, N17.9, Z68.41, N18.3, I24.8, I07.1
0064430	260815014	2015-12-07	2015-12-10	3	E87.1	Hypo-osmolality and hyponatremia	9	Y	I50.33, E87.2, E11.649, N17.9, Z68.41, N18.3, I24.8, I07.1, E87.1
0064430	260815014	2015-12-07	2015-12-10	3	I25.10	Atherosclerotic heart disease of native coronary a	10	Y	I50.33, E87.2, E11.649, N17.9, Z68.41, N18.3, I24.8, I07.1, E87.1, I25.10
0064430	260815014	2015-12-07	2015-12-10	3	E87.5	Hyperkalemia	11	Y	I50.33, E87.2, E11.649, N17.9, Z68.41, N18.3, I24.8, I07.1, E87.1, I25.10, E87.5
0064430	260815014	2015-12-07	2015-12-10	3	Z85.038	Personal history of other malignant neoplasm of la	12		I50.33, E87.2, E11.649, N17.9, Z68.41, N18.3, I24.8, I07.1, E87.1, I25.10, E87.5, Z85.038
0064430	260815014	2015-12-07	2015-12-10	3	Z90.49	Acquired absence of other specified parts of diges	13	Y	I50.33, E87.2, E11.649, N17.9, Z68.41, N18.3, I24.8, I07.1, E87.1, I25.10, E87.5, Z85.038, Z90.49
0064430	260815014	2015-12-07	2015-12-10	3	Z87.891	Personal history of nicotine dependence	14		I50.33, E87.2, E11.649, N17.9, Z68.41, N18.3, I24.8, I07.1, E87.1, I25.10, E87.5, Z85.038, Z90.49, Z87.891
0064430	260815014	2015-12-07	2015-12-10	3	K21.9	Gastro-esophageal reflux disease without esophagit	15	Y	I50.33, E87.2, E11.649, N17.9, Z68.41, N18.3, I24.8, I07.1, E87.1, I25.10, E87.5, Z85.038, Z90.49, Z87.891, K21.9
0064430	260815014	2015-12-07	2015-12-10	3	J44.9	Chronic obstructive pulmonary disease, unspecified	16	Y	I50.33, E87.2, E11.649, N17.9, Z68.41, N18.3, I24.8, I07.1, E87.1, I25.10, E87.5, Z85.038, Z90.49, Z87.891, K21.9, J44.9
0064430	260815014	2015-12-07	2015-12-10	3	I25.2	Old myocardial infarction	17		I50.33, E87.2, E11.649, N17.9, Z68.41, N18.3, I24.8, I07.1, E87.1, I25.10, E87.5, Z85.038, Z90.49, Z87.891, K21.9, J44.9, I25.2
0064430	260815014	2015-12-07	2015-12-10	3	G47.33	Obstructive sleep apnea (adult) (pediatric)	18	Y	I50.33, E87.2, E11.649, N17.9, Z68.41, N18.3, I24.8, I07.1, E87.1, I25.10, E87.5, Z85.038, Z90.49, Z87.891, K21.9, J44.9, I25.2, G47.33
0064430	260815014	2015-12-07	2015-12-10	3	F32.9	Major depressive disorder, single episode, unspeci	19	Y	I50.33, E87.2, E11.649, N17.9, Z68.41, N18.3, I24.8, I07.1, E87.1, I25.10, E87.5, Z85.038, Z90.49, Z87.891, K21.9, J44.9, I25.2, G47.33, F32.9
0064430	260815014	2015-12-07	2015-12-10	3	E78.5	Hyperlipidemia, unspecified	20	Y	I50.33, E87.2, E11.649, N17.9, Z68.41, N18.3, I24.8, I07.1, E87.1, I25.10, E87.5, Z85.038, Z90.49, Z87.891, K21.9, J44.9, I25.2, G47.33, F32.9, E78.5
0064430	260815014	2015-12-07	2015-12-10	3	I12.9	Hypertensive chronic kidney disease with stage 1 t	21	Y	I50.33, E87.2, E11.649, N17.9, Z68.41, N18.3, I24.8, I07.1, E87.1, I25.10, E87.5, Z85.038, Z90.49, Z87.891, K21.9, J44.9, I25.2, G47.33, F32.9, E78.5, I12.9
0064430	260815014	2015-12-07	2015-12-10	3	D50.9	Iron deficiency anemia, unspecified	22	Y	I50.33, E87.2, E11.649, N17.9, Z68.41, N18.3, I24.8, I07.1, E87.1, I25.10, E87.5, Z85.038, Z90.49, Z87.891, K21.9, J44.9, I25.2, G47.33, F32.9, E78.5, I12.9, D50.9
0064430	260815014	2015-12-07	2015-12-10	3	R33.9	Retention of urine, unspecified	23	Y	I50.33, E87.2, E11.649, N17.9, Z68.41, N18.3, I24.8, I07.1, E87.1, I25.10, E87.5, Z85.038, Z90.49, Z87.891, K21.9, J44.9, I25.2, G47.33, F32.9, E78.5, I12.9, D50.9, R33.9
0064430	260815014	2015-12-07	2015-12-10	3	E66.01	Morbid (severe) obesity due to excess calories	24	Y	I50.33, E87.2, E11.649, N17.9, Z68.41, N18.3, I24.8, I07.1, E87.1, I25.10, E87.5, Z85.038, Z90.49, Z87.891, K21.9, J44.9, I25.2, G47.33, F32.9, E78.5, I12.9, D50.9, R33.9, E66.01
0064430	260815014	2015-12-07	2015-12-10	3	Z95.5	Presence of coronary angioplasty implant and graft	25		I50.33, E87.2, E11.649, N17.9, Z68.41, N18.3, I24.8, I07.1, E87.1, I25.10, E87.5, Z85.038, Z90.49, Z87.891, K21.9, J44.9, I25.2, G47.33, F32.9, E78.5, I12.9, D50.9, R33.9, E66.01, Z95.5
0064430	260815014	2015-12-07	2015-12-10	3	R06.00	Dyspnea, unspecified	26	Y	I50.33, E87.2, E11.649, N17.9, Z68.41, N18.3, I24.8, I07.1, E87.1, I25.10, E87.5, Z85.038, Z90.49, Z87.891, K21.9, J44.9, I25.2, G47.33, F32.9, E78.5, I12.9, D50.9, R33.9, E66.01, Z95.5, R06.00	Last
0064430	261540876	2016-01-05	2016-01-10	5	J44.1	Chronic obstructive pulmonary disease with (acute)	1	Y	J44.1
0064430	261540876	2016-01-05	2016-01-10	5	J96.22	Acute and chronic respiratory failure with hyperca	2	Y	J44.1, J96.22
0064430	261540876	2016-01-05	2016-01-10	5	I50.43	Acute on chronic combined systolic (congestive) an	3	Y	J44.1, J96.22, I50.43
0064430	261540876	2016-01-05	2016-01-10	5	N17.9	Acute kidney failure, unspecified	4	N	J44.1, J96.22, I50.43, N17.9
0064430	261540876	2016-01-05	2016-01-10	5	N18.3	Chronic kidney disease, stage 3 (moderate)	5	Y	J44.1, J96.22, I50.43, N17.9, N18.3
0064430	261540876	2016-01-05	2016-01-10	5	E11.22	Type 2 diabetes mellitus with diabetic chronic kid	6	Y	J44.1, J96.22, I50.43, N17.9, N18.3, E11.22
0064430	261540876	2016-01-05	2016-01-10	5	E11.40	Type 2 diabetes mellitus with diabetic neuropathy,	7	Y	J44.1, J96.22, I50.43, N17.9, N18.3, E11.22, E11.40
0064430	261540876	2016-01-05	2016-01-10	5	N39.0	Urinary tract infection, site not specified	8	Y	J44.1, J96.22, I50.43, N17.9, N18.3, E11.22, E11.40, N39.0
0064430	261540876	2016-01-05	2016-01-10	5	B96.20	Unspecified Escherichia coli E. coli as the cause	9	Y	J44.1, J96.22, I50.43, N17.9, N18.3, E11.22, E11.40, N39.0, B96.20
0064430	261540876	2016-01-05	2016-01-10	5	C44.509	Unspecified malignant neoplasm of skin of other pa	10	Y	J44.1, J96.22, I50.43, N17.9, N18.3, E11.22, E11.40, N39.0, B96.20, C44.509
0064430	261540876	2016-01-05	2016-01-10	5	Z68.42	Body mass index (BMI) 45.0-49.9, adult	11		J44.1, J96.22, I50.43, N17.9, N18.3, E11.22, E11.40, N39.0, B96.20, C44.509, Z68.42
0064430	261540876	2016-01-05	2016-01-10	5	E87.1	Hypo-osmolality and hyponatremia	12	Y	J44.1, J96.22, I50.43, N17.9, N18.3, E11.22, E11.40, N39.0, B96.20, C44.509, Z68.42, E87.1
0064430	261540876	2016-01-05	2016-01-10	5	Z99.81	Dependence on supplemental oxygen	13		J44.1, J96.22, I50.43, N17.9, N18.3, E11.22, E11.40, N39.0, B96.20, C44.509, Z68.42, E87.1, Z99.81
0064430	261540876	2016-01-05	2016-01-10	5	E11.65	Type 2 diabetes mellitus with hyperglycemia	14	Y	J44.1, J96.22, I50.43, N17.9, N18.3, E11.22, E11.40, N39.0, B96.20, C44.509, Z68.42, E87.1, Z99.81, E11.65
0064430	261540876	2016-01-05	2016-01-10	5	I25.10	Atherosclerotic heart disease of native coronary a	15	Y	J44.1, J96.22, I50.43, N17.9, N18.3, E11.22, E11.40, N39.0, B96.20, C44.509, Z68.42, E87.1, Z99.81, E11.65, I25.10
0064430	261540876	2016-01-05	2016-01-10	5	Z95.5	Presence of coronary angioplasty implant and graft	16		J44.1, J96.22, I50.43, N17.9, N18.3, E11.22, E11.40, N39.0, B96.20, C44.509, Z68.42, E87.1, Z99.81, E11.65, I25.10, Z95.5
0064430	261540876	2016-01-05	2016-01-10	5	I48.91	Unspecified atrial fibrillation	17	Y	J44.1, J96.22, I50.43, N17.9, N18.3, E11.22, E11.40, N39.0, B96.20, C44.509, Z68.42, E87.1, Z99.81, E11.65, I25.10, Z95.5, I48.91
0064430	261540876	2016-01-05	2016-01-10	5	E11.319	Type 2 diabetes mellitus with unspecified diabetic	18	Y	J44.1, J96.22, I50.43, N17.9, N18.3, E11.22, E11.40, N39.0, B96.20, C44.509, Z68.42, E87.1, Z99.81, E11.65, I25.10, Z95.5, I48.91, E11.319
0064430	261540876	2016-01-05	2016-01-10	5	E66.01	Morbid (severe) obesity due to excess calories	19	Y	J44.1, J96.22, I50.43, N17.9, N18.3, E11.22, E11.40, N39.0, B96.20, C44.509, Z68.42, E87.1, Z99.81, E11.65, I25.10, Z95.5, I48.91, E11.319, E66.01
0064430	261540876	2016-01-05	2016-01-10	5	D63.8	Anemia in other chronic diseases classified elsewh	20	Y	J44.1, J96.22, I50.43, N17.9, N18.3, E11.22, E11.40, N39.0, B96.20, C44.509, Z68.42, E87.1, Z99.81, E11.65, I25.10, Z95.5, I48.91, E11.319, E66.01, D63.8
0064430	261540876	2016-01-05	2016-01-10	5	I12.9	Hypertensive chronic kidney disease with stage 1 t	21	Y	J44.1, J96.22, I50.43, N17.9, N18.3, E11.22, E11.40, N39.0, B96.20, C44.509, Z68.42, E87.1, Z99.81, E11.65, I25.10, Z95.5, I48.91, E11.319, E66.01, D63.8, I12.9
0064430	261540876	2016-01-05	2016-01-10	5	Z72.0	Tobacco use	22		J44.1, J96.22, I50.43, N17.9, N18.3, E11.22, E11.40, N39.0, B96.20, C44.509, Z68.42, E87.1, Z99.81, E11.65, I25.10, Z95.5, I48.91, E11.319, E66.01, D63.8, I12.9, Z72.0
0064430	261540876	2016-01-05	2016-01-10	5	G47.33	Obstructive sleep apnea (adult) (pediatric)	23	Y	J44.1, J96.22, I50.43, N17.9, N18.3, E11.22, E11.40, N39.0, B96.20, C44.509, Z68.42, E87.1, Z99.81, E11.65, I25.10, Z95.5, I48.91, E11.319, E66.01, D63.8, I12.9, Z72.0, G47.33
0064430	261540876	2016-01-05	2016-01-10	5	E78.5	Hyperlipidemia, unspecified	24	Y	J44.1, J96.22, I50.43, N17.9, N18.3, E11.22, E11.40, N39.0, B96.20, C44.509, Z68.42, E87.1, Z99.81, E11.65, I25.10, Z95.5, I48.91, E11.319, E66.01, D63.8, I12.9, Z72.0, G47.33, E78.5
0064430	261540876	2016-01-05	2016-01-10	5	I25.2	Old myocardial infarction	25		J44.1, J96.22, I50.43, N17.9, N18.3, E11.22, E11.40, N39.0, B96.20, C44.509, Z68.42, E87.1, Z99.81, E11.65, I25.10, Z95.5, I48.91, E11.319, E66.01, D63.8, I12.9, Z72.0, G47.33, E78.5, I25.2
0064430	261540876	2016-01-05	2016-01-10	5	Z93.3	Colostomy status	26		J44.1, J96.22, I50.43, N17.9, N18.3, E11.22, E11.40, N39.0, B96.20, C44.509, Z68.42, E87.1, Z99.81, E11.65, I25.10, Z95.5, I48.91, E11.319, E66.01, D63.8, I12.9, Z72.0, G47.33, E78.5, I25.2, Z93.3
0064430	261540876	2016-01-05	2016-01-10	5	Z85.038	Personal history of other malignant neoplasm of la	27		J44.1, J96.22, I50.43, N17.9, N18.3, E11.22, E11.40, N39.0, B96.20, C44.509, Z68.42, E87.1, Z99.81, E11.65, I25.10, Z95.5, I48.91, E11.319, E66.01, D63.8, I12.9, Z72.0, G47.33, E78.5, I25.2, Z93.3, Z85.038
0064430	261540876	2016-01-05	2016-01-10	5	Z90.49	Acquired absence of other specified parts of diges	28	Y	J44.1, J96.22, I50.43, N17.9, N18.3, E11.22, E11.40, N39.0, B96.20, C44.509, Z68.42, E87.1, Z99.81, E11.65, I25.10, Z95.5, I48.91, E11.319, E66.01, D63.8, I12.9, Z72.0, G47.33, E78.5, I25.2, Z93.3, Z85.038, Z90.49
0064430	261540876	2016-01-05	2016-01-10	5	Z79.4	Long term (current) use of insulin	29		J44.1, J96.22, I50.43, N17.9, N18.3, E11.22, E11.40, N39.0, B96.20, C44.509, Z68.42, E87.1, Z99.81, E11.65, I25.10, Z95.5, I48.91, E11.319, E66.01, D63.8, I12.9, Z72.0, G47.33, E78.5, I25.2, Z93.3, Z85.038, Z90.49, Z79.4	Last
0064430	262084007	2016-01-24	2016-02-17	24	J96.21	Acute and chronic respiratory failure with hypoxia	1	Y	J96.21
0064430	262084007	2016-01-24	2016-02-17	24	R65.20	Severe sepsis without septic shock	2	N	J96.21, R65.20
0064430	262084007	2016-01-24	2016-02-17	24	J15.212	Pneumonia due to Methicillin resistant Staphylococ	3	Y	J96.21, R65.20, J15.212
0064430	262084007	2016-01-24	2016-02-17	24	I50.33	Acute on chronic diastolic (congestive) heart fail	4	Y	J96.21, R65.20, J15.212, I50.33
0064430	262084007	2016-01-24	2016-02-17	24	A41.9	Sepsis, unspecified organism	5	N	J96.21, R65.20, J15.212, I50.33, A41.9
0064430	262084007	2016-01-24	2016-02-17	24	N17.9	Acute kidney failure, unspecified	6	N	J96.21, R65.20, J15.212, I50.33, A41.9, N17.9
0064430	262084007	2016-01-24	2016-02-17	24	E87.0	Hyperosmolality and hypernatremia	7	N	J96.21, R65.20, J15.212, I50.33, A41.9, N17.9, E87.0
0064430	262084007	2016-01-24	2016-02-17	24	N18.4	Chronic kidney disease, stage 4 (severe)	8	Y	J96.21, R65.20, J15.212, I50.33, A41.9, N17.9, E87.0, N18.4
0064430	262084007	2016-01-24	2016-02-17	24	I08.3	Combined rheumatic disorders of mitral, aortic and	9	Y	J96.21, R65.20, J15.212, I50.33, A41.9, N17.9, E87.0, N18.4, I08.3
0064430	262084007	2016-01-24	2016-02-17	24	I24.8	Other forms of acute ischemic heart disease	10	N	J96.21, R65.20, J15.212, I50.33, A41.9, N17.9, E87.0, N18.4, I08.3, I24.8
0064430	262084007	2016-01-24	2016-02-17	24	I42.9	Cardiomyopathy, unspecified	11	Y	J96.21, R65.20, J15.212, I50.33, A41.9, N17.9, E87.0, N18.4, I08.3, I24.8, I42.9
0064430	262084007	2016-01-24	2016-02-17	24	J44.1	Chronic obstructive pulmonary disease with (acute)	12	Y	J96.21, R65.20, J15.212, I50.33, A41.9, N17.9, E87.0, N18.4, I08.3, I24.8, I42.9, J44.1
0064430	262084007	2016-01-24	2016-02-17	24	Z68.41	Body mass index (BMI) 40.0-44.9, adult	13		J96.21, R65.20, J15.212, I50.33, A41.9, N17.9, E87.0, N18.4, I08.3, I24.8, I42.9, J44.1, Z68.41
0064430	262084007	2016-01-24	2016-02-17	24	J96.22	Acute and chronic respiratory failure with hyperca	14	Y	J96.21, R65.20, J15.212, I50.33, A41.9, N17.9, E87.0, N18.4, I08.3, I24.8, I42.9, J44.1, Z68.41, J96.22
0064430	262084007	2016-01-24	2016-02-17	24	Z99.81	Dependence on supplemental oxygen	15		J96.21, R65.20, J15.212, I50.33, A41.9, N17.9, E87.0, N18.4, I08.3, I24.8, I42.9, J44.1, Z68.41, J96.22, Z99.81
0064430	262084007	2016-01-24	2016-02-17	24	E11.40	Type 2 diabetes mellitus with diabetic neuropathy,	16	Y	J96.21, R65.20, J15.212, I50.33, A41.9, N17.9, E87.0, N18.4, I08.3, I24.8, I42.9, J44.1, Z68.41, J96.22, Z99.81, E11.40
0064430	262084007	2016-01-24	2016-02-17	24	I25.82	Chronic total occlusion of coronary artery	17	Y	J96.21, R65.20, J15.212, I50.33, A41.9, N17.9, E87.0, N18.4, I08.3, I24.8, I42.9, J44.1, Z68.41, J96.22, Z99.81, E11.40, I25.82
0064430	262084007	2016-01-24	2016-02-17	24	E11.65	Type 2 diabetes mellitus with hyperglycemia	18	Y	J96.21, R65.20, J15.212, I50.33, A41.9, N17.9, E87.0, N18.4, I08.3, I24.8, I42.9, J44.1, Z68.41, J96.22, Z99.81, E11.40, I25.82, E11.65
0064430	262084007	2016-01-24	2016-02-17	24	I12.9	Hypertensive chronic kidney disease with stage 1 t	19	Y	J96.21, R65.20, J15.212, I50.33, A41.9, N17.9, E87.0, N18.4, I08.3, I24.8, I42.9, J44.1, Z68.41, J96.22, Z99.81, E11.40, I25.82, E11.65, I12.9
0064430	262084007	2016-01-24	2016-02-17	24	E11.649	Type 2 diabetes mellitus with hypoglycemia without	20	N	J96.21, R65.20, J15.212, I50.33, A41.9, N17.9, E87.0, N18.4, I08.3, I24.8, I42.9, J44.1, Z68.41, J96.22, Z99.81, E11.40, I25.82, E11.65, I12.9, E11.649
0064430	262084007	2016-01-24	2016-02-17	24	D63.8	Anemia in other chronic diseases classified elsewh	21	Y	J96.21, R65.20, J15.212, I50.33, A41.9, N17.9, E87.0, N18.4, I08.3, I24.8, I42.9, J44.1, Z68.41, J96.22, Z99.81, E11.40, I25.82, E11.65, I12.9, E11.649, D63.8
0064430	262084007	2016-01-24	2016-02-17	24	E66.01	Morbid (severe) obesity due to excess calories	22	Y	J96.21, R65.20, J15.212, I50.33, A41.9, N17.9, E87.0, N18.4, I08.3, I24.8, I42.9, J44.1, Z68.41, J96.22, Z99.81, E11.40, I25.82, E11.65, I12.9, E11.649, D63.8, E66.01
0064430	262084007	2016-01-24	2016-02-17	24	I25.10	Atherosclerotic heart disease of native coronary a	23	Y	J96.21, R65.20, J15.212, I50.33, A41.9, N17.9, E87.0, N18.4, I08.3, I24.8, I42.9, J44.1, Z68.41, J96.22, Z99.81, E11.40, I25.82, E11.65, I12.9, E11.649, D63.8, E66.01, I25.10
0064430	262084007	2016-01-24	2016-02-17	24	Z79.02	Long term (current) use of antithrombotics/antipla	24		J96.21, R65.20, J15.212, I50.33, A41.9, N17.9, E87.0, N18.4, I08.3, I24.8, I42.9, J44.1, Z68.41, J96.22, Z99.81, E11.40, I25.82, E11.65, I12.9, E11.649, D63.8, E66.01, I25.10, Z79.02
0064430	262084007	2016-01-24	2016-02-17	24	Z85.038	Personal history of other malignant neoplasm of la	25		J96.21, R65.20, J15.212, I50.33, A41.9, N17.9, E87.0, N18.4, I08.3, I24.8, I42.9, J44.1, Z68.41, J96.22, Z99.81, E11.40, I25.82, E11.65, I12.9, E11.649, D63.8, E66.01, I25.10, Z79.02, Z85.038	Last
0064430	263115065	2016-02-27	2016-03-04	6	I21.4	Non-ST elevation (NSTEMI) myocardial infarction	1	Y	I21.4
0064430	263115065	2016-02-27	2016-03-04	6	J96.21	Acute and chronic respiratory failure with hypoxia	2	Y	I21.4, J96.21
0064430	263115065	2016-02-27	2016-03-04	6	I50.43	Acute on chronic combined systolic (congestive) an	3	Y	I21.4, J96.21, I50.43
0064430	263115065	2016-02-27	2016-03-04	6	N17.9	Acute kidney failure, unspecified	4	Y	I21.4, J96.21, I50.43, N17.9
0064430	263115065	2016-02-27	2016-03-04	6	N18.3	Chronic kidney disease, stage 3 (moderate)	5	Y	I21.4, J96.21, I50.43, N17.9, N18.3
0064430	263115065	2016-02-27	2016-03-04	6	J44.0	Chronic obstructive pulmonary disease with acute l	6	Y	I21.4, J96.21, I50.43, N17.9, N18.3, J44.0
0064430	263115065	2016-02-27	2016-03-04	6	D50.9	Iron deficiency anemia, unspecified	7	Y	I21.4, J96.21, I50.43, N17.9, N18.3, J44.0, D50.9
0064430	263115065	2016-02-27	2016-03-04	6	F17.200	Nicotine dependence, unspecified, uncomplicated	8	Y	I21.4, J96.21, I50.43, N17.9, N18.3, J44.0, D50.9, F17.200
0064430	263115065	2016-02-27	2016-03-04	6	I12.9	Hypertensive chronic kidney disease with stage 1 t	9	Y	I21.4, J96.21, I50.43, N17.9, N18.3, J44.0, D50.9, F17.200, I12.9
0064430	263115065	2016-02-27	2016-03-04	6	J96.22	Acute and chronic respiratory failure with hyperca	10	Y	I21.4, J96.21, I50.43, N17.9, N18.3, J44.0, D50.9, F17.200, I12.9, J96.22
0064430	263115065	2016-02-27	2016-03-04	6	N39.0	Urinary tract infection, site not specified	11	Y	I21.4, J96.21, I50.43, N17.9, N18.3, J44.0, D50.9, F17.200, I12.9, J96.22, N39.0
0064430	263115065	2016-02-27	2016-03-04	6	E66.2	Morbid (severe) obesity with alveolar hypoventilat	12	Y	I21.4, J96.21, I50.43, N17.9, N18.3, J44.0, D50.9, F17.200, I12.9, J96.22, N39.0, E66.2
0064430	263115065	2016-02-27	2016-03-04	6	E11.21	Type 2 diabetes mellitus with diabetic nephropathy	13	Y	I21.4, J96.21, I50.43, N17.9, N18.3, J44.0, D50.9, F17.200, I12.9, J96.22, N39.0, E66.2, E11.21
0064430	263115065	2016-02-27	2016-03-04	6	E11.65	Type 2 diabetes mellitus with hyperglycemia	14	Y	I21.4, J96.21, I50.43, N17.9, N18.3, J44.0, D50.9, F17.200, I12.9, J96.22, N39.0, E66.2, E11.21, E11.65
0064430	263115065	2016-02-27	2016-03-04	6	Z99.81	Dependence on supplemental oxygen	15		I21.4, J96.21, I50.43, N17.9, N18.3, J44.0, D50.9, F17.200, I12.9, J96.22, N39.0, E66.2, E11.21, E11.65, Z99.81
0064430	263115065	2016-02-27	2016-03-04	6	I25.10	Atherosclerotic heart disease of native coronary a	16	Y	I21.4, J96.21, I50.43, N17.9, N18.3, J44.0, D50.9, F17.200, I12.9, J96.22, N39.0, E66.2, E11.21, E11.65, Z99.81, I25.10
0064430	263115065	2016-02-27	2016-03-04	6	K21.9	Gastro-esophageal reflux disease without esophagit	17	Y	I21.4, J96.21, I50.43, N17.9, N18.3, J44.0, D50.9, F17.200, I12.9, J96.22, N39.0, E66.2, E11.21, E11.65, Z99.81, I25.10, K21.9
0064430	263115065	2016-02-27	2016-03-04	6	E78.5	Hyperlipidemia, unspecified	18	Y	I21.4, J96.21, I50.43, N17.9, N18.3, J44.0, D50.9, F17.200, I12.9, J96.22, N39.0, E66.2, E11.21, E11.65, Z99.81, I25.10, K21.9, E78.5
0064430	263115065	2016-02-27	2016-03-04	6	E11.319	Type 2 diabetes mellitus with unspecified diabetic	19	Y	I21.4, J96.21, I50.43, N17.9, N18.3, J44.0, D50.9, F17.200, I12.9, J96.22, N39.0, E66.2, E11.21, E11.65, Z99.81, I25.10, K21.9, E78.5, E11.319
0064430	263115065	2016-02-27	2016-03-04	6	B96.20	Unspecified Escherichia coli E. coli as the cause	20	Y	I21.4, J96.21, I50.43, N17.9, N18.3, J44.0, D50.9, F17.200, I12.9, J96.22, N39.0, E66.2, E11.21, E11.65, Z99.81, I25.10, K21.9, E78.5, E11.319, B96.20
0064430	263115065	2016-02-27	2016-03-04	6	E11.649	Type 2 diabetes mellitus with hypoglycemia without	21	Y	I21.4, J96.21, I50.43, N17.9, N18.3, J44.0, D50.9, F17.200, I12.9, J96.22, N39.0, E66.2, E11.21, E11.65, Z99.81, I25.10, K21.9, E78.5, E11.319, B96.20, E11.649
0064430	263115065	2016-02-27	2016-03-04	6	G89.29	Other chronic pain	22	Y	I21.4, J96.21, I50.43, N17.9, N18.3, J44.0, D50.9, F17.200, I12.9, J96.22, N39.0, E66.2, E11.21, E11.65, Z99.81, I25.10, K21.9, E78.5, E11.319, B96.20, E11.649, G89.29
0064430	263115065	2016-02-27	2016-03-04	6	I08.0	Rheumatic disorders of both mitral and aortic valv	23	Y	I21.4, J96.21, I50.43, N17.9, N18.3, J44.0, D50.9, F17.200, I12.9, J96.22, N39.0, E66.2, E11.21, E11.65, Z99.81, I25.10, K21.9, E78.5, E11.319, B96.20, E11.649, G89.29, I08.0
0064430	263115065	2016-02-27	2016-03-04	6	F32.9	Major depressive disorder, single episode, unspeci	24	Y	I21.4, J96.21, I50.43, N17.9, N18.3, J44.0, D50.9, F17.200, I12.9, J96.22, N39.0, E66.2, E11.21, E11.65, Z99.81, I25.10, K21.9, E78.5, E11.319, B96.20, E11.649, G89.29, I08.0, F32.9
0064430	263115065	2016-02-27	2016-03-04	6	D63.8	Anemia in other chronic diseases classified elsewh	25	Y	I21.4, J96.21, I50.43, N17.9, N18.3, J44.0, D50.9, F17.200, I12.9, J96.22, N39.0, E66.2, E11.21, E11.65, Z99.81, I25.10, K21.9, E78.5, E11.319, B96.20, E11.649, G89.29, I08.0, F32.9, D63.8
0064430	263115065	2016-02-27	2016-03-04	6	I25.5	Ischemic cardiomyopathy	26	Y	I21.4, J96.21, I50.43, N17.9, N18.3, J44.0, D50.9, F17.200, I12.9, J96.22, N39.0, E66.2, E11.21, E11.65, Z99.81, I25.10, K21.9, E78.5, E11.319, B96.20, E11.649, G89.29, I08.0, F32.9, D63.8, I25.5
0064430	263115065	2016-02-27	2016-03-04	6	I48.91	Unspecified atrial fibrillation	27	Y	I21.4, J96.21, I50.43, N17.9, N18.3, J44.0, D50.9, F17.200, I12.9, J96.22, N39.0, E66.2, E11.21, E11.65, Z99.81, I25.10, K21.9, E78.5, E11.319, B96.20, E11.649, G89.29, I08.0, F32.9, D63.8, I25.5, I48.91
0064430	263115065	2016-02-27	2016-03-04	6	Z88.6	Allergy status to analgesic agent status	28		I21.4, J96.21, I50.43, N17.9, N18.3, J44.0, D50.9, F17.200, I12.9, J96.22, N39.0, E66.2, E11.21, E11.65, Z99.81, I25.10, K21.9, E78.5, E11.319, B96.20, E11.649, G89.29, I08.0, F32.9, D63.8, I25.5, I48.91, Z88.6
0064430	263115065	2016-02-27	2016-03-04	6	Z85.038	Personal history of other malignant neoplasm of la	29		I21.4, J96.21, I50.43, N17.9, N18.3, J44.0, D50.9, F17.200, I12.9, J96.22, N39.0, E66.2, E11.21, E11.65, Z99.81, I25.10, K21.9, E78.5, E11.319, B96.20, E11.649, G89.29, I08.0, F32.9, D63.8, I25.5, I48.91, Z88.6, Z85.038
0064430	263115065	2016-02-27	2016-03-04	6	Z93.3	Colostomy status	30		I21.4, J96.21, I50.43, N17.9, N18.3, J44.0, D50.9, F17.200, I12.9, J96.22, N39.0, E66.2, E11.21, E11.65, Z99.81, I25.10, K21.9, E78.5, E11.319, B96.20, E11.649, G89.29, I08.0, F32.9, D63.8, I25.5, I48.91, Z88.6, Z85.038, Z93.3	Last
0068040	261389183	2015-12-29	2016-01-09	11	I50.33	Acute on chronic diastolic (congestive) heart fail	1	Y	I50.33
0068040	261389183	2015-12-29	2016-01-09	11	J96.21	Acute and chronic respiratory failure with hypoxia	2	Y	I50.33, J96.21
0068040	261389183	2015-12-29	2016-01-09	11	J18.9	Pneumonia, unspecified organism	3	Y	I50.33, J96.21, J18.9
0068040	261389183	2015-12-29	2016-01-09	11	N17.9	Acute kidney failure, unspecified	4	Y	I50.33, J96.21, J18.9, N17.9
0068040	261389183	2015-12-29	2016-01-09	11	I27.2	Other secondary pulmonary hypertension	5	Y	I50.33, J96.21, J18.9, N17.9, I27.2
0068040	261389183	2015-12-29	2016-01-09	11	Z86.74	Personal history of sudden cardiac arrest	6		I50.33, J96.21, J18.9, N17.9, I27.2, Z86.74
0068040	261389183	2015-12-29	2016-01-09	11	I48.91	Unspecified atrial fibrillation	7	Y	I50.33, J96.21, J18.9, N17.9, I27.2, Z86.74, I48.91
0068040	261389183	2015-12-29	2016-01-09	11	Z99.81	Dependence on supplemental oxygen	8		I50.33, J96.21, J18.9, N17.9, I27.2, Z86.74, I48.91, Z99.81
0068040	261389183	2015-12-29	2016-01-09	11	J44.1	Chronic obstructive pulmonary disease with (acute)	9	Y	I50.33, J96.21, J18.9, N17.9, I27.2, Z86.74, I48.91, Z99.81, J44.1
0068040	261389183	2015-12-29	2016-01-09	11	D63.8	Anemia in other chronic diseases classified elsewh	10	Y	I50.33, J96.21, J18.9, N17.9, I27.2, Z86.74, I48.91, Z99.81, J44.1, D63.8
0068040	261389183	2015-12-29	2016-01-09	11	R31.0	Gross hematuria	11	Y	I50.33, J96.21, J18.9, N17.9, I27.2, Z86.74, I48.91, Z99.81, J44.1, D63.8, R31.0
0068040	261389183	2015-12-29	2016-01-09	11	I10	Essential (primary) hypertension	12	Y	I50.33, J96.21, J18.9, N17.9, I27.2, Z86.74, I48.91, Z99.81, J44.1, D63.8, R31.0, I10
0068040	261389183	2015-12-29	2016-01-09	11	I25.119	Atherosclerotic heart disease of native coronary a	13	Y	I50.33, J96.21, J18.9, N17.9, I27.2, Z86.74, I48.91, Z99.81, J44.1, D63.8, R31.0, I10, I25.119
0068040	261389183	2015-12-29	2016-01-09	11	G47.00	Insomnia, unspecified	14	Y	I50.33, J96.21, J18.9, N17.9, I27.2, Z86.74, I48.91, Z99.81, J44.1, D63.8, R31.0, I10, I25.119, G47.00
0068040	261389183	2015-12-29	2016-01-09	11	Y95	Nosocomial condition	15	Y	I50.33, J96.21, J18.9, N17.9, I27.2, Z86.74, I48.91, Z99.81, J44.1, D63.8, R31.0, I10, I25.119, G47.00, Y95
0068040	261389183	2015-12-29	2016-01-09	11	M54.9	Dorsalgia, unspecified	16	Y	I50.33, J96.21, J18.9, N17.9, I27.2, Z86.74, I48.91, Z99.81, J44.1, D63.8, R31.0, I10, I25.119, G47.00, Y95, M54.9
0068040	261389183	2015-12-29	2016-01-09	11	G89.29	Other chronic pain	17	Y	I50.33, J96.21, J18.9, N17.9, I27.2, Z86.74, I48.91, Z99.81, J44.1, D63.8, R31.0, I10, I25.119, G47.00, Y95, M54.9, G89.29
0068040	261389183	2015-12-29	2016-01-09	11	G43.909	Migraine, unspecified, not intractable, without st	18	Y	I50.33, J96.21, J18.9, N17.9, I27.2, Z86.74, I48.91, Z99.81, J44.1, D63.8, R31.0, I10, I25.119, G47.00, Y95, M54.9, G89.29, G43.909
0068040	261389183	2015-12-29	2016-01-09	11	Z79.01	Long term (current) use of anticoagulants	19		I50.33, J96.21, J18.9, N17.9, I27.2, Z86.74, I48.91, Z99.81, J44.1, D63.8, R31.0, I10, I25.119, G47.00, Y95, M54.9, G89.29, G43.909, Z79.01
0068040	261389183	2015-12-29	2016-01-09	11	Z87.01	Personal history of pneumonia (recurrent)	20		I50.33, J96.21, J18.9, N17.9, I27.2, Z86.74, I48.91, Z99.81, J44.1, D63.8, R31.0, I10, I25.119, G47.00, Y95, M54.9, G89.29, G43.909, Z79.01, Z87.01
0068040	261389183	2015-12-29	2016-01-09	11	Z91.19	Patients noncompliance with other medical treatmen	21	Y	I50.33, J96.21, J18.9, N17.9, I27.2, Z86.74, I48.91, Z99.81, J44.1, D63.8, R31.0, I10, I25.119, G47.00, Y95, M54.9, G89.29, G43.909, Z79.01, Z87.01, Z91.19
0068040	261389183	2015-12-29	2016-01-09	11	Z95.810	Presence of automatic (implantable) cardiac defibr	22		I50.33, J96.21, J18.9, N17.9, I27.2, Z86.74, I48.91, Z99.81, J44.1, D63.8, R31.0, I10, I25.119, G47.00, Y95, M54.9, G89.29, G43.909, Z79.01, Z87.01, Z91.19, Z95.810
0068040	261389183	2015-12-29	2016-01-09	11	Z96.642	Presence of left artificial hip joint	23	Y	I50.33, J96.21, J18.9, N17.9, I27.2, Z86.74, I48.91, Z99.81, J44.1, D63.8, R31.0, I10, I25.119, G47.00, Y95, M54.9, G89.29, G43.909, Z79.01, Z87.01, Z91.19, Z95.810, Z96.642	Last
0070133	261893283	2016-01-17	2016-01-22	5	I50.33	Acute on chronic diastolic (congestive) heart fail	1	Y	I50.33
0070133	261893283	2016-01-17	2016-01-22	5	J96.21	Acute and chronic respiratory failure with hypoxia	2	Y	I50.33, J96.21
0070133	261893283	2016-01-17	2016-01-22	5	J18.9	Pneumonia, unspecified organism	3	Y	I50.33, J96.21, J18.9
0070133	261893283	2016-01-17	2016-01-22	5	G92	Toxic encephalopathy	4	Y	I50.33, J96.21, J18.9, G92
0070133	261893283	2016-01-17	2016-01-22	5	N17.9	Acute kidney failure, unspecified	5	Y	I50.33, J96.21, J18.9, G92, N17.9
0070133	261893283	2016-01-17	2016-01-22	5	E87.3	Alkalosis	6	Y	I50.33, J96.21, J18.9, G92, N17.9, E87.3
0070133	261893283	2016-01-17	2016-01-22	5	N18.3	Chronic kidney disease, stage 3 (moderate)	7	Y	I50.33, J96.21, J18.9, G92, N17.9, E87.3, N18.3
0070133	261893283	2016-01-17	2016-01-22	5	F03.90	Unspecified dementia without behavioral disturbanc	8	Y	I50.33, J96.21, J18.9, G92, N17.9, E87.3, N18.3, F03.90
0070133	261893283	2016-01-17	2016-01-22	5	N39.0	Urinary tract infection, site not specified	9	Y	I50.33, J96.21, J18.9, G92, N17.9, E87.3, N18.3, F03.90, N39.0
0070133	261893283	2016-01-17	2016-01-22	5	E11.22	Type 2 diabetes mellitus with diabetic chronic kid	10	Y	I50.33, J96.21, J18.9, G92, N17.9, E87.3, N18.3, F03.90, N39.0, E11.22
0070133	261893283	2016-01-17	2016-01-22	5	R13.10	Dysphagia, unspecified	11	Y	I50.33, J96.21, J18.9, G92, N17.9, E87.3, N18.3, F03.90, N39.0, E11.22, R13.10
0070133	261893283	2016-01-17	2016-01-22	5	I12.9	Hypertensive chronic kidney disease with stage 1 t	12	Y	I50.33, J96.21, J18.9, G92, N17.9, E87.3, N18.3, F03.90, N39.0, E11.22, R13.10, I12.9
0070133	261893283	2016-01-17	2016-01-22	5	J44.9	Chronic obstructive pulmonary disease, unspecified	13	Y	I50.33, J96.21, J18.9, G92, N17.9, E87.3, N18.3, F03.90, N39.0, E11.22, R13.10, I12.9, J44.9
0070133	261893283	2016-01-17	2016-01-22	5	F32.9	Major depressive disorder, single episode, unspeci	14	Y	I50.33, J96.21, J18.9, G92, N17.9, E87.3, N18.3, F03.90, N39.0, E11.22, R13.10, I12.9, J44.9, F32.9
0070133	261893283	2016-01-17	2016-01-22	5	E78.5	Hyperlipidemia, unspecified	15	Y	I50.33, J96.21, J18.9, G92, N17.9, E87.3, N18.3, F03.90, N39.0, E11.22, R13.10, I12.9, J44.9, F32.9, E78.5
0070133	261893283	2016-01-17	2016-01-22	5	E66.01	Morbid (severe) obesity due to excess calories	16	Y	I50.33, J96.21, J18.9, G92, N17.9, E87.3, N18.3, F03.90, N39.0, E11.22, R13.10, I12.9, J44.9, F32.9, E78.5, E66.01
0070133	261893283	2016-01-17	2016-01-22	5	G47.33	Obstructive sleep apnea (adult) (pediatric)	17	Y	I50.33, J96.21, J18.9, G92, N17.9, E87.3, N18.3, F03.90, N39.0, E11.22, R13.10, I12.9, J44.9, F32.9, E78.5, E66.01, G47.33
0070133	261893283	2016-01-17	2016-01-22	5	I25.10	Atherosclerotic heart disease of native coronary a	18	Y	I50.33, J96.21, J18.9, G92, N17.9, E87.3, N18.3, F03.90, N39.0, E11.22, R13.10, I12.9, J44.9, F32.9, E78.5, E66.01, G47.33, I25.10
0070133	261893283	2016-01-17	2016-01-22	5	D64.9	Anemia, unspecified	19	Y	I50.33, J96.21, J18.9, G92, N17.9, E87.3, N18.3, F03.90, N39.0, E11.22, R13.10, I12.9, J44.9, F32.9, E78.5, E66.01, G47.33, I25.10, D64.9
0070133	261893283	2016-01-17	2016-01-22	5	R41.82	Altered mental status, unspecified	20	Y	I50.33, J96.21, J18.9, G92, N17.9, E87.3, N18.3, F03.90, N39.0, E11.22, R13.10, I12.9, J44.9, F32.9, E78.5, E66.01, G47.33, I25.10, D64.9, R41.82
0070133	261893283	2016-01-17	2016-01-22	5	E87.6	Hypokalemia	21	Y	I50.33, J96.21, J18.9, G92, N17.9, E87.3, N18.3, F03.90, N39.0, E11.22, R13.10, I12.9, J44.9, F32.9, E78.5, E66.01, G47.33, I25.10, D64.9, R41.82, E87.6
0070133	261893283	2016-01-17	2016-01-22	5	Z88.8	Allergy status to other drugs, medicaments and bio	22		I50.33, J96.21, J18.9, G92, N17.9, E87.3, N18.3, F03.90, N39.0, E11.22, R13.10, I12.9, J44.9, F32.9, E78.5, E66.01, G47.33, I25.10, D64.9, R41.82, E87.6, Z88.8
0070133	261893283	2016-01-17	2016-01-22	5	Z87.440	Personal history of urinary (tract) infections	23		I50.33, J96.21, J18.9, G92, N17.9, E87.3, N18.3, F03.90, N39.0, E11.22, R13.10, I12.9, J44.9, F32.9, E78.5, E66.01, G47.33, I25.10, D64.9, R41.82, E87.6, Z88.8, Z87.440
0070133	261893283	2016-01-17	2016-01-22	5	Z79.4	Long term (current) use of insulin	24		I50.33, J96.21, J18.9, G92, N17.9, E87.3, N18.3, F03.90, N39.0, E11.22, R13.10, I12.9, J44.9, F32.9, E78.5, E66.01, G47.33, I25.10, D64.9, R41.82, E87.6, Z88.8, Z87.440, Z79.4
0070133	261893283	2016-01-17	2016-01-22	5	Z68.42	Body mass index (BMI) 45.0-49.9, adult	25		I50.33, J96.21, J18.9, G92, N17.9, E87.3, N18.3, F03.90, N39.0, E11.22, R13.10, I12.9, J44.9, F32.9, E78.5, E66.01, G47.33, I25.10, D64.9, R41.82, E87.6, Z88.8, Z87.440, Z79.4, Z68.42	Last
0070133	262909047	2016-02-20	2016-02-29	9	N17.9	Acute kidney failure, unspecified	1	Y	N17.9
0070133	262909047	2016-02-20	2016-02-29	9	J96.01	Acute respiratory failure with hypoxia	2	Y	N17.9, J96.01
0070133	262909047	2016-02-20	2016-02-29	9	I50.33	Acute on chronic diastolic (congestive) heart fail	3	Y	N17.9, J96.01, I50.33
0070133	262909047	2016-02-20	2016-02-29	9	E87.4	Mixed disorder of acid-base balance	4	Y	N17.9, J96.01, I50.33, E87.4
0070133	262909047	2016-02-20	2016-02-29	9	I95.9	Hypotension, unspecified	5	Y	N17.9, J96.01, I50.33, E87.4, I95.9
0070133	262909047	2016-02-20	2016-02-29	9	F03.90	Unspecified dementia without behavioral disturbanc	6	Y	N17.9, J96.01, I50.33, E87.4, I95.9, F03.90
0070133	262909047	2016-02-20	2016-02-29	9	E87.5	Hyperkalemia	7	Y	N17.9, J96.01, I50.33, E87.4, I95.9, F03.90, E87.5
0070133	262909047	2016-02-20	2016-02-29	9	Z68.42	Body mass index (BMI) 45.0-49.9, adult	8		N17.9, J96.01, I50.33, E87.4, I95.9, F03.90, E87.5, Z68.42
0070133	262909047	2016-02-20	2016-02-29	9	I12.0	Hypertensive chronic kidney disease with stage 5 c	9	Y	N17.9, J96.01, I50.33, E87.4, I95.9, F03.90, E87.5, Z68.42, I12.0
0070133	262909047	2016-02-20	2016-02-29	9	G62.9	Polyneuropathy, unspecified	10	Y	N17.9, J96.01, I50.33, E87.4, I95.9, F03.90, E87.5, Z68.42, I12.0, G62.9
0070133	262909047	2016-02-20	2016-02-29	9	E66.2	Morbid (severe) obesity with alveolar hypoventilat	11	Y	N17.9, J96.01, I50.33, E87.4, I95.9, F03.90, E87.5, Z68.42, I12.0, G62.9, E66.2
0070133	262909047	2016-02-20	2016-02-29	9	J44.9	Chronic obstructive pulmonary disease, unspecified	12	Y	N17.9, J96.01, I50.33, E87.4, I95.9, F03.90, E87.5, Z68.42, I12.0, G62.9, E66.2, J44.9
0070133	262909047	2016-02-20	2016-02-29	9	E11.9	Type 2 diabetes mellitus without complications	13	Y	N17.9, J96.01, I50.33, E87.4, I95.9, F03.90, E87.5, Z68.42, I12.0, G62.9, E66.2, J44.9, E11.9
0070133	262909047	2016-02-20	2016-02-29	9	G47.33	Obstructive sleep apnea (adult) (pediatric)	14	Y	N17.9, J96.01, I50.33, E87.4, I95.9, F03.90, E87.5, Z68.42, I12.0, G62.9, E66.2, J44.9, E11.9, G47.33
0070133	262909047	2016-02-20	2016-02-29	9	E66.01	Morbid (severe) obesity due to excess calories	15	Y	N17.9, J96.01, I50.33, E87.4, I95.9, F03.90, E87.5, Z68.42, I12.0, G62.9, E66.2, J44.9, E11.9, G47.33, E66.01
0070133	262909047	2016-02-20	2016-02-29	9	F32.9	Major depressive disorder, single episode, unspeci	16	Y	N17.9, J96.01, I50.33, E87.4, I95.9, F03.90, E87.5, Z68.42, I12.0, G62.9, E66.2, J44.9, E11.9, G47.33, E66.01, F32.9
0070133	262909047	2016-02-20	2016-02-29	9	I25.10	Atherosclerotic heart disease of native coronary a	17	Y	N17.9, J96.01, I50.33, E87.4, I95.9, F03.90, E87.5, Z68.42, I12.0, G62.9, E66.2, J44.9, E11.9, G47.33, E66.01, F32.9, I25.10
0070133	262909047	2016-02-20	2016-02-29	9	Z53.09	Procedure and treatment not carried out because of	18	Y	N17.9, J96.01, I50.33, E87.4, I95.9, F03.90, E87.5, Z68.42, I12.0, G62.9, E66.2, J44.9, E11.9, G47.33, E66.01, F32.9, I25.10, Z53.09
0070133	262909047	2016-02-20	2016-02-29	9	D64.9	Anemia, unspecified	19	Y	N17.9, J96.01, I50.33, E87.4, I95.9, F03.90, E87.5, Z68.42, I12.0, G62.9, E66.2, J44.9, E11.9, G47.33, E66.01, F32.9, I25.10, Z53.09, D64.9
0070133	262909047	2016-02-20	2016-02-29	9	K21.9	Gastro-esophageal reflux disease without esophagit	20	Y	N17.9, J96.01, I50.33, E87.4, I95.9, F03.90, E87.5, Z68.42, I12.0, G62.9, E66.2, J44.9, E11.9, G47.33, E66.01, F32.9, I25.10, Z53.09, D64.9, K21.9
0070133	262909047	2016-02-20	2016-02-29	9	M10.9	Gout, unspecified	21	Y	N17.9, J96.01, I50.33, E87.4, I95.9, F03.90, E87.5, Z68.42, I12.0, G62.9, E66.2, J44.9, E11.9, G47.33, E66.01, F32.9, I25.10, Z53.09, D64.9, K21.9, M10.9
0070133	262909047	2016-02-20	2016-02-29	9	N18.6	End stage renal disease	22	Y	N17.9, J96.01, I50.33, E87.4, I95.9, F03.90, E87.5, Z68.42, I12.0, G62.9, E66.2, J44.9, E11.9, G47.33, E66.01, F32.9, I25.10, Z53.09, D64.9, K21.9, M10.9, N18.6
0070133	262909047	2016-02-20	2016-02-29	9	Z91.19	Patients noncompliance with other medical treatmen	23	Y	N17.9, J96.01, I50.33, E87.4, I95.9, F03.90, E87.5, Z68.42, I12.0, G62.9, E66.2, J44.9, E11.9, G47.33, E66.01, F32.9, I25.10, Z53.09, D64.9, K21.9, M10.9, N18.6, Z91.19
0070133	262909047	2016-02-20	2016-02-29	9	Z88.8	Allergy status to other drugs, medicaments and bio	24		N17.9, J96.01, I50.33, E87.4, I95.9, F03.90, E87.5, Z68.42, I12.0, G62.9, E66.2, J44.9, E11.9, G47.33, E66.01, F32.9, I25.10, Z53.09, D64.9, K21.9, M10.9, N18.6, Z91.19, Z88.8
0070133	262909047	2016-02-20	2016-02-29	9	Z88.6	Allergy status to analgesic agent status	25		N17.9, J96.01, I50.33, E87.4, I95.9, F03.90, E87.5, Z68.42, I12.0, G62.9, E66.2, J44.9, E11.9, G47.33, E66.01, F32.9, I25.10, Z53.09, D64.9, K21.9, M10.9, N18.6, Z91.19, Z88.8, Z88.6
0070133	262909047	2016-02-20	2016-02-29	9	Z79.4	Long term (current) use of insulin	26		N17.9, J96.01, I50.33, E87.4, I95.9, F03.90, E87.5, Z68.42, I12.0, G62.9, E66.2, J44.9, E11.9, G47.33, E66.01, F32.9, I25.10, Z53.09, D64.9, K21.9, M10.9, N18.6, Z91.19, Z88.8, Z88.6, Z79.4
0070133	262909047	2016-02-20	2016-02-29	9	Z87.891	Personal history of nicotine dependence	27		N17.9, J96.01, I50.33, E87.4, I95.9, F03.90, E87.5, Z68.42, I12.0, G62.9, E66.2, J44.9, E11.9, G47.33, E66.01, F32.9, I25.10, Z53.09, D64.9, K21.9, M10.9, N18.6, Z91.19, Z88.8, Z88.6, Z79.4, Z87.891
0070133	262909047	2016-02-20	2016-02-29	9	Z99.2	Dependence on renal dialysis	28		N17.9, J96.01, I50.33, E87.4, I95.9, F03.90, E87.5, Z68.42, I12.0, G62.9, E66.2, J44.9, E11.9, G47.33, E66.01, F32.9, I25.10, Z53.09, D64.9, K21.9, M10.9, N18.6, Z91.19, Z88.8, Z88.6, Z79.4, Z87.891, Z99.2	Last
0073046	262087679	2016-01-25	2016-01-29	4	A41.9	Sepsis, unspecified organism	1	Y	A41.9
0073046	262087679	2016-01-25	2016-01-29	4	I26.99	Other pulmonary embolism without acute cor pulmona	2	Y	A41.9, I26.99
0073046	262087679	2016-01-25	2016-01-29	4	I21.4	Non-ST elevation (NSTEMI) myocardial infarction	3	Y	A41.9, I26.99, I21.4
0073046	262087679	2016-01-25	2016-01-29	4	G92	Toxic encephalopathy	4	Y	A41.9, I26.99, I21.4, G92
0073046	262087679	2016-01-25	2016-01-29	4	E22.2	Syndrome of inappropriate secretion of antidiureti	5	Y	A41.9, I26.99, I21.4, G92, E22.2
0073046	262087679	2016-01-25	2016-01-29	4	N39.0	Urinary tract infection, site not specified	6	Y	A41.9, I26.99, I21.4, G92, E22.2, N39.0
0073046	262087679	2016-01-25	2016-01-29	4	I51.81	Takotsubo syndrome	7	Y	A41.9, I26.99, I21.4, G92, E22.2, N39.0, I51.81
0073046	262087679	2016-01-25	2016-01-29	4	I50.30	Unspecified diastolic (congestive) heart failure	8	Y	A41.9, I26.99, I21.4, G92, E22.2, N39.0, I51.81, I50.30
0073046	262087679	2016-01-25	2016-01-29	4	R65.20	Severe sepsis without septic shock	9	Y	A41.9, I26.99, I21.4, G92, E22.2, N39.0, I51.81, I50.30, R65.20
0073046	262087679	2016-01-25	2016-01-29	4	I10	Essential (primary) hypertension	10	Y	A41.9, I26.99, I21.4, G92, E22.2, N39.0, I51.81, I50.30, R65.20, I10
0073046	262087679	2016-01-25	2016-01-29	4	I73.9	Peripheral vascular disease, unspecified	11	Y	A41.9, I26.99, I21.4, G92, E22.2, N39.0, I51.81, I50.30, R65.20, I10, I73.9
0073046	262087679	2016-01-25	2016-01-29	4	Z89.512	Acquired absence of left leg below knee	12		A41.9, I26.99, I21.4, G92, E22.2, N39.0, I51.81, I50.30, R65.20, I10, I73.9, Z89.512
0073046	262087679	2016-01-25	2016-01-29	4	I25.10	Atherosclerotic heart disease of native coronary a	13	Y	A41.9, I26.99, I21.4, G92, E22.2, N39.0, I51.81, I50.30, R65.20, I10, I73.9, Z89.512, I25.10
0073046	262087679	2016-01-25	2016-01-29	4	F17.210	Nicotine dependence, cigarettes, uncomplicated	14	Y	A41.9, I26.99, I21.4, G92, E22.2, N39.0, I51.81, I50.30, R65.20, I10, I73.9, Z89.512, I25.10, F17.210
0073046	262087679	2016-01-25	2016-01-29	4	E87.6	Hypokalemia	15	Y	A41.9, I26.99, I21.4, G92, E22.2, N39.0, I51.81, I50.30, R65.20, I10, I73.9, Z89.512, I25.10, F17.210, E87.6
0073046	262087679	2016-01-25	2016-01-29	4	B96.20	Unspecified Escherichia coli E. coli as the cause	16	Y	A41.9, I26.99, I21.4, G92, E22.2, N39.0, I51.81, I50.30, R65.20, I10, I73.9, Z89.512, I25.10, F17.210, E87.6, B96.20
0073046	262087679	2016-01-25	2016-01-29	4	E83.39	Other disorders of phosphorus metabolism	17	Y	A41.9, I26.99, I21.4, G92, E22.2, N39.0, I51.81, I50.30, R65.20, I10, I73.9, Z89.512, I25.10, F17.210, E87.6, B96.20, E83.39
0073046	262087679	2016-01-25	2016-01-29	4	Z91.19	Patients noncompliance with other medical treatmen	18	Y	A41.9, I26.99, I21.4, G92, E22.2, N39.0, I51.81, I50.30, R65.20, I10, I73.9, Z89.512, I25.10, F17.210, E87.6, B96.20, E83.39, Z91.19
0073046	262087679	2016-01-25	2016-01-29	4	Z89.611	Acquired absence of right leg above knee	19		A41.9, I26.99, I21.4, G92, E22.2, N39.0, I51.81, I50.30, R65.20, I10, I73.9, Z89.512, I25.10, F17.210, E87.6, B96.20, E83.39, Z91.19, Z89.611
0073046	262087679	2016-01-25	2016-01-29	4	F17.200	Nicotine dependence, unspecified, uncomplicated	20	Y	A41.9, I26.99, I21.4, G92, E22.2, N39.0, I51.81, I50.30, R65.20, I10, I73.9, Z89.512, I25.10, F17.210, E87.6, B96.20, E83.39, Z91.19, Z89.611, F17.200
0073046	262087679	2016-01-25	2016-01-29	4	G62.9	Polyneuropathy, unspecified	21	Y	A41.9, I26.99, I21.4, G92, E22.2, N39.0, I51.81, I50.30, R65.20, I10, I73.9, Z89.512, I25.10, F17.210, E87.6, B96.20, E83.39, Z91.19, Z89.611, F17.200, G62.9
0073046	262087679	2016-01-25	2016-01-29	4	F10.20	Alcohol dependence, uncomplicated	22	Y	A41.9, I26.99, I21.4, G92, E22.2, N39.0, I51.81, I50.30, R65.20, I10, I73.9, Z89.512, I25.10, F17.210, E87.6, B96.20, E83.39, Z91.19, Z89.611, F17.200, G62.9, F10.20
0073046	262087679	2016-01-25	2016-01-29	4	F12.90	Cannabis use, unspecified, uncomplicated	23	Y	A41.9, I26.99, I21.4, G92, E22.2, N39.0, I51.81, I50.30, R65.20, I10, I73.9, Z89.512, I25.10, F17.210, E87.6, B96.20, E83.39, Z91.19, Z89.611, F17.200, G62.9, F10.20, F12.90
0073046	262087679	2016-01-25	2016-01-29	4	F32.9	Major depressive disorder, single episode, unspeci	24	Y	A41.9, I26.99, I21.4, G92, E22.2, N39.0, I51.81, I50.30, R65.20, I10, I73.9, Z89.512, I25.10, F17.210, E87.6, B96.20, E83.39, Z91.19, Z89.611, F17.200, G62.9, F10.20, F12.90, F32.9
0073046	262087679	2016-01-25	2016-01-29	4	F41.9	Anxiety disorder, unspecified	25	Y	A41.9, I26.99, I21.4, G92, E22.2, N39.0, I51.81, I50.30, R65.20, I10, I73.9, Z89.512, I25.10, F17.210, E87.6, B96.20, E83.39, Z91.19, Z89.611, F17.200, G62.9, F10.20, F12.90, F32.9, F41.9
0073046	262087679	2016-01-25	2016-01-29	4	G40.909	Epilepsy, unspecified, not intractable, without st	26	Y	A41.9, I26.99, I21.4, G92, E22.2, N39.0, I51.81, I50.30, R65.20, I10, I73.9, Z89.512, I25.10, F17.210, E87.6, B96.20, E83.39, Z91.19, Z89.611, F17.200, G62.9, F10.20, F12.90, F32.9, F41.9, G40.909
0073046	262087679	2016-01-25	2016-01-29	4	G89.29	Other chronic pain	27	Y	A41.9, I26.99, I21.4, G92, E22.2, N39.0, I51.81, I50.30, R65.20, I10, I73.9, Z89.512, I25.10, F17.210, E87.6, B96.20, E83.39, Z91.19, Z89.611, F17.200, G62.9, F10.20, F12.90, F32.9, F41.9, G40.909, G89.29
0073046	262087679	2016-01-25	2016-01-29	4	I25.84	Coronary atherosclerosis due to calcified coronary	28	Y	A41.9, I26.99, I21.4, G92, E22.2, N39.0, I51.81, I50.30, R65.20, I10, I73.9, Z89.512, I25.10, F17.210, E87.6, B96.20, E83.39, Z91.19, Z89.611, F17.200, G62.9, F10.20, F12.90, F32.9, F41.9, G40.909, G89.29, I25.84
0073046	262087679	2016-01-25	2016-01-29	4	Z86.718	Personal history of other venous thrombosis and em	29		A41.9, I26.99, I21.4, G92, E22.2, N39.0, I51.81, I50.30, R65.20, I10, I73.9, Z89.512, I25.10, F17.210, E87.6, B96.20, E83.39, Z91.19, Z89.611, F17.200, G62.9, F10.20, F12.90, F32.9, F41.9, G40.909, G89.29, I25.84, Z86.718	Last
0077152	262683485	2016-02-12	2016-02-16	4	A41.9	Sepsis, unspecified organism	1	Y	A41.9
0077152	262683485	2016-02-12	2016-02-16	4	N18.6	End stage renal disease	2	Y	A41.9, N18.6
0077152	262683485	2016-02-12	2016-02-16	4	I12.0	Hypertensive chronic kidney disease with stage 5 c	3	Y	A41.9, N18.6, I12.0
0077152	262683485	2016-02-12	2016-02-16	4	T82.868A	Thrombosis of vascular prosthetic devices, implant	4	Y	A41.9, N18.6, I12.0, T82.868A
0077152	262683485	2016-02-12	2016-02-16	4	L03.317	Cellulitis of buttock	5	Y	A41.9, N18.6, I12.0, T82.868A, L03.317
0077152	262683485	2016-02-12	2016-02-16	4	L02.31	Cutaneous abscess of buttock	6	Y	A41.9, N18.6, I12.0, T82.868A, L03.317, L02.31
0077152	262683485	2016-02-12	2016-02-16	4	K61.1	Rectal abscess	7	Y	A41.9, N18.6, I12.0, T82.868A, L03.317, L02.31, K61.1
0077152	262683485	2016-02-12	2016-02-16	4	I25.10	Atherosclerotic heart disease of native coronary a	8	Y	A41.9, N18.6, I12.0, T82.868A, L03.317, L02.31, K61.1, I25.10
0077152	262683485	2016-02-12	2016-02-16	4	Z87.891	Personal history of nicotine dependence	9	Y	A41.9, N18.6, I12.0, T82.868A, L03.317, L02.31, K61.1, I25.10, Z87.891
0077152	262683485	2016-02-12	2016-02-16	4	Z99.2	Dependence on renal dialysis	10	Y	A41.9, N18.6, I12.0, T82.868A, L03.317, L02.31, K61.1, I25.10, Z87.891, Z99.2
0077152	262683485	2016-02-12	2016-02-16	4	F41.8	Other specified anxiety disorders	11	Y	A41.9, N18.6, I12.0, T82.868A, L03.317, L02.31, K61.1, I25.10, Z87.891, Z99.2, F41.8
0077152	262683485	2016-02-12	2016-02-16	4	B19.20	Unspecified viral hepatitis C without hepatic coma	12	Y	A41.9, N18.6, I12.0, T82.868A, L03.317, L02.31, K61.1, I25.10, Z87.891, Z99.2, F41.8, B19.20
0077152	262683485	2016-02-12	2016-02-16	4	M10.9	Gout, unspecified	13	Y	A41.9, N18.6, I12.0, T82.868A, L03.317, L02.31, K61.1, I25.10, Z87.891, Z99.2, F41.8, B19.20, M10.9
0077152	262683485	2016-02-12	2016-02-16	4	Y95	Nosocomial condition	14	Y	A41.9, N18.6, I12.0, T82.868A, L03.317, L02.31, K61.1, I25.10, Z87.891, Z99.2, F41.8, B19.20, M10.9, Y95
0077152	262683485	2016-02-12	2016-02-16	4	Y83.2	Surgical operation with anastomosis, bypass or gra	15	Y	A41.9, N18.6, I12.0, T82.868A, L03.317, L02.31, K61.1, I25.10, Z87.891, Z99.2, F41.8, B19.20, M10.9, Y95, Y83.2
0077152	262683485	2016-02-12	2016-02-16	4	B95.62	Methicillin resistant Staphylococcus aureus infect	16	Y	A41.9, N18.6, I12.0, T82.868A, L03.317, L02.31, K61.1, I25.10, Z87.891, Z99.2, F41.8, B19.20, M10.9, Y95, Y83.2, B95.62	Last
0090967	259214187	2015-10-11	2015-10-16	5	A41.9	Sepsis, unspecified organism	1	Y	A41.9
0090967	259214187	2015-10-11	2015-10-16	5	J96.20	Acute and chronic respiratory failure, unspecified	2	Y	A41.9, J96.20
0090967	259214187	2015-10-11	2015-10-16	5	G82.50	Quadriplegia, unspecified	3	Y	A41.9, J96.20, G82.50
0090967	259214187	2015-10-11	2015-10-16	5	Z99.11	Dependence on respirator ventilator status	4		A41.9, J96.20, G82.50, Z99.11
0090967	259214187	2015-10-11	2015-10-16	5	J95.851	Ventilator associated pneumonia	5	Y	A41.9, J96.20, G82.50, Z99.11, J95.851
0090967	259214187	2015-10-11	2015-10-16	5	L89.159	Pressure ulcer of sacral region, unspecified stage	6	Y	A41.9, J96.20, G82.50, Z99.11, J95.851, L89.159
0090967	259214187	2015-10-11	2015-10-16	5	R65.20	Severe sepsis without septic shock	7	Y	A41.9, J96.20, G82.50, Z99.11, J95.851, L89.159, R65.20
0090967	259214187	2015-10-11	2015-10-16	5	K94.23	Gastrostomy malfunction	8	Y	A41.9, J96.20, G82.50, Z99.11, J95.851, L89.159, R65.20, K94.23
0090967	259214187	2015-10-11	2015-10-16	5	Y83.3	Surgical operation with formation of external stom	9	Y	A41.9, J96.20, G82.50, Z99.11, J95.851, L89.159, R65.20, K94.23, Y83.3
0090967	259214187	2015-10-11	2015-10-16	5	E03.9	Hypothyroidism, unspecified	10	Y	A41.9, J96.20, G82.50, Z99.11, J95.851, L89.159, R65.20, K94.23, Y83.3, E03.9
0090967	259214187	2015-10-11	2015-10-16	5	I10	Essential (primary) hypertension	11	Y	A41.9, J96.20, G82.50, Z99.11, J95.851, L89.159, R65.20, K94.23, Y83.3, E03.9, I10
0090967	259214187	2015-10-11	2015-10-16	5	K31.84	Gastroparesis	12	Y	A41.9, J96.20, G82.50, Z99.11, J95.851, L89.159, R65.20, K94.23, Y83.3, E03.9, I10, K31.84
0090967	259214187	2015-10-11	2015-10-16	5	D64.9	Anemia, unspecified	13	Y	A41.9, J96.20, G82.50, Z99.11, J95.851, L89.159, R65.20, K94.23, Y83.3, E03.9, I10, K31.84, D64.9
0090967	259214187	2015-10-11	2015-10-16	5	B96.89	Other specified bacterial agents as the cause of d	14	Y	A41.9, J96.20, G82.50, Z99.11, J95.851, L89.159, R65.20, K94.23, Y83.3, E03.9, I10, K31.84, D64.9, B96.89
0090967	259214187	2015-10-11	2015-10-16	5	F43.9	Reaction to severe stress, unspecified	15	N	A41.9, J96.20, G82.50, Z99.11, J95.851, L89.159, R65.20, K94.23, Y83.3, E03.9, I10, K31.84, D64.9, B96.89, F43.9
0090967	259214187	2015-10-11	2015-10-16	5	Y92.9	Unspecified place or not applicable	16		A41.9, J96.20, G82.50, Z99.11, J95.851, L89.159, R65.20, K94.23, Y83.3, E03.9, I10, K31.84, D64.9, B96.89, F43.9, Y92.9
0090967	259214187	2015-10-11	2015-10-16	5	Z86.14	Personal history of Methicillin resistant Staphylo	17		A41.9, J96.20, G82.50, Z99.11, J95.851, L89.159, R65.20, K94.23, Y83.3, E03.9, I10, K31.84, D64.9, B96.89, F43.9, Y92.9, Z86.14
0090967	259214187	2015-10-11	2015-10-16	5	Z88.1	Allergy status to other antibiotic agents status	18		A41.9, J96.20, G82.50, Z99.11, J95.851, L89.159, R65.20, K94.23, Y83.3, E03.9, I10, K31.84, D64.9, B96.89, F43.9, Y92.9, Z86.14, Z88.1
0090967	259214187	2015-10-11	2015-10-16	5	Z91.041	Radiographic dye allergy status	19		A41.9, J96.20, G82.50, Z99.11, J95.851, L89.159, R65.20, K94.23, Y83.3, E03.9, I10, K31.84, D64.9, B96.89, F43.9, Y92.9, Z86.14, Z88.1, Z91.041	Last
0096885	262303845	2016-02-01	2016-02-09	8	I31.2	Hemopericardium, not elsewhere classified	1	Y	I31.2
0096885	262303845	2016-02-01	2016-02-09	8	J96.01	Acute respiratory failure with hypoxia	2	Y	I31.2, J96.01
0096885	262303845	2016-02-01	2016-02-09	8	I50.31	Acute diastolic (congestive) heart failure	3	Y	I31.2, J96.01, I50.31
0096885	262303845	2016-02-01	2016-02-09	8	J90	Pleural effusion, not elsewhere classified	4	Y	I31.2, J96.01, I50.31, J90
0096885	262303845	2016-02-01	2016-02-09	8	I48.2	Chronic atrial fibrillation	5	Y	I31.2, J96.01, I50.31, J90, I48.2
0096885	262303845	2016-02-01	2016-02-09	8	E11.9	Type 2 diabetes mellitus without complications	6	Y	I31.2, J96.01, I50.31, J90, I48.2, E11.9
0096885	262303845	2016-02-01	2016-02-09	8	D64.9	Anemia, unspecified	7	Y	I31.2, J96.01, I50.31, J90, I48.2, E11.9, D64.9
0096885	262303845	2016-02-01	2016-02-09	8	E78.0	Pure hypercholesterolemia	8	Y	I31.2, J96.01, I50.31, J90, I48.2, E11.9, D64.9, E78.0
0096885	262303845	2016-02-01	2016-02-09	8	I48.1	Persistent atrial fibrillation	9	Y	I31.2, J96.01, I50.31, J90, I48.2, E11.9, D64.9, E78.0, I48.1
0096885	262303845	2016-02-01	2016-02-09	8	I10	Essential (primary) hypertension	10	Y	I31.2, J96.01, I50.31, J90, I48.2, E11.9, D64.9, E78.0, I48.1, I10
0096885	262303845	2016-02-01	2016-02-09	8	Z79.4	Long term (current) use of insulin	11		I31.2, J96.01, I50.31, J90, I48.2, E11.9, D64.9, E78.0, I48.1, I10, Z79.4
0096885	262303845	2016-02-01	2016-02-09	8	I73.9	Peripheral vascular disease, unspecified	12	Y	I31.2, J96.01, I50.31, J90, I48.2, E11.9, D64.9, E78.0, I48.1, I10, Z79.4, I73.9
0096885	262303845	2016-02-01	2016-02-09	8	I87.2	Venous insufficiency (chronic) (peripheral)	13	Y	I31.2, J96.01, I50.31, J90, I48.2, E11.9, D64.9, E78.0, I48.1, I10, Z79.4, I73.9, I87.2
0096885	262303845	2016-02-01	2016-02-09	8	E78.5	Hyperlipidemia, unspecified	14	Y	I31.2, J96.01, I50.31, J90, I48.2, E11.9, D64.9, E78.0, I48.1, I10, Z79.4, I73.9, I87.2, E78.5
0096885	262303845	2016-02-01	2016-02-09	8	Z89.512	Acquired absence of left leg below knee	15		I31.2, J96.01, I50.31, J90, I48.2, E11.9, D64.9, E78.0, I48.1, I10, Z79.4, I73.9, I87.2, E78.5, Z89.512
0096885	262303845	2016-02-01	2016-02-09	8	M19.90	Unspecified osteoarthritis, unspecified site	16	Y	I31.2, J96.01, I50.31, J90, I48.2, E11.9, D64.9, E78.0, I48.1, I10, Z79.4, I73.9, I87.2, E78.5, Z89.512, M19.90
0096885	262303845	2016-02-01	2016-02-09	8	I25.10	Atherosclerotic heart disease of native coronary a	17	Y	I31.2, J96.01, I50.31, J90, I48.2, E11.9, D64.9, E78.0, I48.1, I10, Z79.4, I73.9, I87.2, E78.5, Z89.512, M19.90, I25.10
0096885	262303845	2016-02-01	2016-02-09	8	K59.00	Constipation, unspecified	18	N	I31.2, J96.01, I50.31, J90, I48.2, E11.9, D64.9, E78.0, I48.1, I10, Z79.4, I73.9, I87.2, E78.5, Z89.512, M19.90, I25.10, K59.00
0096885	262303845	2016-02-01	2016-02-09	8	Z86.73	Personal history of transient ischemic attack (TIA	19		I31.2, J96.01, I50.31, J90, I48.2, E11.9, D64.9, E78.0, I48.1, I10, Z79.4, I73.9, I87.2, E78.5, Z89.512, M19.90, I25.10, K59.00, Z86.73
0096885	262303845	2016-02-01	2016-02-09	8	Z88.1	Allergy status to other antibiotic agents status	20		I31.2, J96.01, I50.31, J90, I48.2, E11.9, D64.9, E78.0, I48.1, I10, Z79.4, I73.9, I87.2, E78.5, Z89.512, M19.90, I25.10, K59.00, Z86.73, Z88.1	Last
0096885	263032310	2016-02-24	2016-02-28	4	I50.33	Acute on chronic diastolic (congestive) heart fail	1	Y	I50.33
0096885	263032310	2016-02-24	2016-02-28	4	J96.21	Acute and chronic respiratory failure with hypoxia	2	Y	I50.33, J96.21
0096885	263032310	2016-02-24	2016-02-28	4	I31.2	Hemopericardium, not elsewhere classified	3	Y	I50.33, J96.21, I31.2
0096885	263032310	2016-02-24	2016-02-28	4	N17.9	Acute kidney failure, unspecified	4	Y	I50.33, J96.21, I31.2, N17.9
0096885	263032310	2016-02-24	2016-02-28	4	J91.8	Pleural effusion in other conditions classified el	5	Y	I50.33, J96.21, I31.2, N17.9, J91.8
0096885	263032310	2016-02-24	2016-02-28	4	I48.2	Chronic atrial fibrillation	6	Y	I50.33, J96.21, I31.2, N17.9, J91.8, I48.2
0096885	263032310	2016-02-24	2016-02-28	4	S80.829A	Blister (nonthermal), unspecified lower leg, initi	7	Y	I50.33, J96.21, I31.2, N17.9, J91.8, I48.2, S80.829A
0096885	263032310	2016-02-24	2016-02-28	4	E78.5	Hyperlipidemia, unspecified	8	Y	I50.33, J96.21, I31.2, N17.9, J91.8, I48.2, S80.829A, E78.5
0096885	263032310	2016-02-24	2016-02-28	4	I10	Essential (primary) hypertension	9	Y	I50.33, J96.21, I31.2, N17.9, J91.8, I48.2, S80.829A, E78.5, I10
0096885	263032310	2016-02-24	2016-02-28	4	E11.9	Type 2 diabetes mellitus without complications	10	Y	I50.33, J96.21, I31.2, N17.9, J91.8, I48.2, S80.829A, E78.5, I10, E11.9
0096885	263032310	2016-02-24	2016-02-28	4	I73.9	Peripheral vascular disease, unspecified	11	Y	I50.33, J96.21, I31.2, N17.9, J91.8, I48.2, S80.829A, E78.5, I10, E11.9, I73.9
0096885	263032310	2016-02-24	2016-02-28	4	I25.10	Atherosclerotic heart disease of native coronary a	12	Y	I50.33, J96.21, I31.2, N17.9, J91.8, I48.2, S80.829A, E78.5, I10, E11.9, I73.9, I25.10
0096885	263032310	2016-02-24	2016-02-28	4	I87.2	Venous insufficiency (chronic) (peripheral)	13	Y	I50.33, J96.21, I31.2, N17.9, J91.8, I48.2, S80.829A, E78.5, I10, E11.9, I73.9, I25.10, I87.2
0096885	263032310	2016-02-24	2016-02-28	4	K21.9	Gastro-esophageal reflux disease without esophagit	14	Y	I50.33, J96.21, I31.2, N17.9, J91.8, I48.2, S80.829A, E78.5, I10, E11.9, I73.9, I25.10, I87.2, K21.9
0096885	263032310	2016-02-24	2016-02-28	4	Z79.4	Long term (current) use of insulin	15		I50.33, J96.21, I31.2, N17.9, J91.8, I48.2, S80.829A, E78.5, I10, E11.9, I73.9, I25.10, I87.2, K21.9, Z79.4
0096885	263032310	2016-02-24	2016-02-28	4	Z79.01	Long term (current) use of anticoagulants	16		I50.33, J96.21, I31.2, N17.9, J91.8, I48.2, S80.829A, E78.5, I10, E11.9, I73.9, I25.10, I87.2, K21.9, Z79.4, Z79.01
0096885	263032310	2016-02-24	2016-02-28	4	Z89.512	Acquired absence of left leg below knee	17		I50.33, J96.21, I31.2, N17.9, J91.8, I48.2, S80.829A, E78.5, I10, E11.9, I73.9, I25.10, I87.2, K21.9, Z79.4, Z79.01, Z89.512
0096885	263032310	2016-02-24	2016-02-28	4	Z79.82	Long term (current) use of aspirin	18		I50.33, J96.21, I31.2, N17.9, J91.8, I48.2, S80.829A, E78.5, I10, E11.9, I73.9, I25.10, I87.2, K21.9, Z79.4, Z79.01, Z89.512, Z79.82
0096885	263032310	2016-02-24	2016-02-28	4	Z88.1	Allergy status to other antibiotic agents status	19		I50.33, J96.21, I31.2, N17.9, J91.8, I48.2, S80.829A, E78.5, I10, E11.9, I73.9, I25.10, I87.2, K21.9, Z79.4, Z79.01, Z89.512, Z79.82, Z88.1	Last
0097535	260298906	2015-11-17	2015-11-21	4	I21.4	Non-ST elevation (NSTEMI) myocardial infarction	1	Y	I21.4
0097535	260298906	2015-11-17	2015-11-21	4	N17.9	Acute kidney failure, unspecified	2	Y	I21.4, N17.9
0097535	260298906	2015-11-17	2015-11-21	4	J96.11	Chronic respiratory failure with hypoxia	3	Y	I21.4, N17.9, J96.11
0097535	260298906	2015-11-17	2015-11-21	4	D89.9	Disorder involving the immune mechanism, unspecifi	4	Y	I21.4, N17.9, J96.11, D89.9
0097535	260298906	2015-11-17	2015-11-21	4	Z68.41	Body mass index (BMI) 40.0-44.9, adult	5		I21.4, N17.9, J96.11, D89.9, Z68.41
0097535	260298906	2015-11-17	2015-11-21	4	E66.2	Morbid (severe) obesity with alveolar hypoventilat	6	Y	I21.4, N17.9, J96.11, D89.9, Z68.41, E66.2
0097535	260298906	2015-11-17	2015-11-21	4	N39.0	Urinary tract infection, site not specified	7	Y	I21.4, N17.9, J96.11, D89.9, Z68.41, E66.2, N39.0
0097535	260298906	2015-11-17	2015-11-21	4	Z99.81	Dependence on supplemental oxygen	8		I21.4, N17.9, J96.11, D89.9, Z68.41, E66.2, N39.0, Z99.81
0097535	260298906	2015-11-17	2015-11-21	4	R41.82	Altered mental status, unspecified	9	Y	I21.4, N17.9, J96.11, D89.9, Z68.41, E66.2, N39.0, Z99.81, R41.82
0097535	260298906	2015-11-17	2015-11-21	4	J44.9	Chronic obstructive pulmonary disease, unspecified	10	Y	I21.4, N17.9, J96.11, D89.9, Z68.41, E66.2, N39.0, Z99.81, R41.82, J44.9
0097535	260298906	2015-11-17	2015-11-21	4	L40.9	Psoriasis, unspecified	11	Y	I21.4, N17.9, J96.11, D89.9, Z68.41, E66.2, N39.0, Z99.81, R41.82, J44.9, L40.9
0097535	260298906	2015-11-17	2015-11-21	4	F17.210	Nicotine dependence, cigarettes, uncomplicated	12	Y	I21.4, N17.9, J96.11, D89.9, Z68.41, E66.2, N39.0, Z99.81, R41.82, J44.9, L40.9, F17.210
0097535	260298906	2015-11-17	2015-11-21	4	G47.33	Obstructive sleep apnea (adult) (pediatric)	13	Y	I21.4, N17.9, J96.11, D89.9, Z68.41, E66.2, N39.0, Z99.81, R41.82, J44.9, L40.9, F17.210, G47.33
0097535	260298906	2015-11-17	2015-11-21	4	D63.8	Anemia in other chronic diseases classified elsewh	14	Y	I21.4, N17.9, J96.11, D89.9, Z68.41, E66.2, N39.0, Z99.81, R41.82, J44.9, L40.9, F17.210, G47.33, D63.8
0097535	260298906	2015-11-17	2015-11-21	4	R60.1	Generalized edema	15	Y	I21.4, N17.9, J96.11, D89.9, Z68.41, E66.2, N39.0, Z99.81, R41.82, J44.9, L40.9, F17.210, G47.33, D63.8, R60.1
0097535	260298906	2015-11-17	2015-11-21	4	Z82.49	Family history of ischemic heart disease and other	16		I21.4, N17.9, J96.11, D89.9, Z68.41, E66.2, N39.0, Z99.81, R41.82, J44.9, L40.9, F17.210, G47.33, D63.8, R60.1, Z82.49
0097535	260298906	2015-11-17	2015-11-21	4	I45.10	Unspecified right bundle-branch block	17	Y	I21.4, N17.9, J96.11, D89.9, Z68.41, E66.2, N39.0, Z99.81, R41.82, J44.9, L40.9, F17.210, G47.33, D63.8, R60.1, Z82.49, I45.10
0097535	260298906	2015-11-17	2015-11-21	4	I24.8	Other forms of acute ischemic heart disease	18	Y	I21.4, N17.9, J96.11, D89.9, Z68.41, E66.2, N39.0, Z99.81, R41.82, J44.9, L40.9, F17.210, G47.33, D63.8, R60.1, Z82.49, I45.10, I24.8
0097535	260298906	2015-11-17	2015-11-21	4	I51.7	Cardiomegaly	19	Y	I21.4, N17.9, J96.11, D89.9, Z68.41, E66.2, N39.0, Z99.81, R41.82, J44.9, L40.9, F17.210, G47.33, D63.8, R60.1, Z82.49, I45.10, I24.8, I51.7
0097535	260298906	2015-11-17	2015-11-21	4	I25.10	Atherosclerotic heart disease of native coronary a	20	Y	I21.4, N17.9, J96.11, D89.9, Z68.41, E66.2, N39.0, Z99.81, R41.82, J44.9, L40.9, F17.210, G47.33, D63.8, R60.1, Z82.49, I45.10, I24.8, I51.7, I25.10
0097535	260298906	2015-11-17	2015-11-21	4	D47.2	Monoclonal gammopathy	21	Y	I21.4, N17.9, J96.11, D89.9, Z68.41, E66.2, N39.0, Z99.81, R41.82, J44.9, L40.9, F17.210, G47.33, D63.8, R60.1, Z82.49, I45.10, I24.8, I51.7, I25.10, D47.2
0097535	260298906	2015-11-17	2015-11-21	4	R41.0	Disorientation, unspecified	22	Y	I21.4, N17.9, J96.11, D89.9, Z68.41, E66.2, N39.0, Z99.81, R41.82, J44.9, L40.9, F17.210, G47.33, D63.8, R60.1, Z82.49, I45.10, I24.8, I51.7, I25.10, D47.2, R41.0
0097535	260298906	2015-11-17	2015-11-21	4	B96.1	Klebsiella pneumoniae K. pneumoniae as the cause o	23	Y	I21.4, N17.9, J96.11, D89.9, Z68.41, E66.2, N39.0, Z99.81, R41.82, J44.9, L40.9, F17.210, G47.33, D63.8, R60.1, Z82.49, I45.10, I24.8, I51.7, I25.10, D47.2, R41.0, B96.1
0097535	260298906	2015-11-17	2015-11-21	4	M54.2	Cervicalgia	24	Y	I21.4, N17.9, J96.11, D89.9, Z68.41, E66.2, N39.0, Z99.81, R41.82, J44.9, L40.9, F17.210, G47.33, D63.8, R60.1, Z82.49, I45.10, I24.8, I51.7, I25.10, D47.2, R41.0, B96.1, M54.2
0097535	260298906	2015-11-17	2015-11-21	4	G89.29	Other chronic pain	25	Y	I21.4, N17.9, J96.11, D89.9, Z68.41, E66.2, N39.0, Z99.81, R41.82, J44.9, L40.9, F17.210, G47.33, D63.8, R60.1, Z82.49, I45.10, I24.8, I51.7, I25.10, D47.2, R41.0, B96.1, M54.2, G89.29
0097535	260298906	2015-11-17	2015-11-21	4	M54.5	Low back pain	26	Y	I21.4, N17.9, J96.11, D89.9, Z68.41, E66.2, N39.0, Z99.81, R41.82, J44.9, L40.9, F17.210, G47.33, D63.8, R60.1, Z82.49, I45.10, I24.8, I51.7, I25.10, D47.2, R41.0, B96.1, M54.2, G89.29, M54.5
0097535	260298906	2015-11-17	2015-11-21	4	R63.0	Anorexia	27	Y	I21.4, N17.9, J96.11, D89.9, Z68.41, E66.2, N39.0, Z99.81, R41.82, J44.9, L40.9, F17.210, G47.33, D63.8, R60.1, Z82.49, I45.10, I24.8, I51.7, I25.10, D47.2, R41.0, B96.1, M54.2, G89.29, M54.5, R63.0
0097535	260298906	2015-11-17	2015-11-21	4	Z79.82	Long term (current) use of aspirin	28		I21.4, N17.9, J96.11, D89.9, Z68.41, E66.2, N39.0, Z99.81, R41.82, J44.9, L40.9, F17.210, G47.33, D63.8, R60.1, Z82.49, I45.10, I24.8, I51.7, I25.10, D47.2, R41.0, B96.1, M54.2, G89.29, M54.5, R63.0, Z79.82
0097535	260298906	2015-11-17	2015-11-21	4	J98.4	Other disorders of lung	29	Y	I21.4, N17.9, J96.11, D89.9, Z68.41, E66.2, N39.0, Z99.81, R41.82, J44.9, L40.9, F17.210, G47.33, D63.8, R60.1, Z82.49, I45.10, I24.8, I51.7, I25.10, D47.2, R41.0, B96.1, M54.2, G89.29, M54.5, R63.0, Z79.82, J98.4
0097535	260298906	2015-11-17	2015-11-21	4	E78.5	Hyperlipidemia, unspecified	30	Y	I21.4, N17.9, J96.11, D89.9, Z68.41, E66.2, N39.0, Z99.81, R41.82, J44.9, L40.9, F17.210, G47.33, D63.8, R60.1, Z82.49, I45.10, I24.8, I51.7, I25.10, D47.2, R41.0, B96.1, M54.2, G89.29, M54.5, R63.0, Z79.82, J98.4, E78.5	Last
0101211	261895312	2016-01-18	2016-02-15	28	A41.9	Sepsis, unspecified organism	1	Y	A41.9
0101211	261895312	2016-01-18	2016-02-15	28	D65	Disseminated intravascular coagulation defibrinati	2	N	A41.9, D65
0101211	261895312	2016-01-18	2016-02-15	28	J96.01	Acute respiratory failure with hypoxia	3	Y	A41.9, D65, J96.01
0101211	261895312	2016-01-18	2016-02-15	28	N17.0	Acute kidney failure with tubular necrosis	4	Y	A41.9, D65, J96.01, N17.0
0101211	261895312	2016-01-18	2016-02-15	28	R65.21	Severe sepsis with septic shock	5	Y	A41.9, D65, J96.01, N17.0, R65.21
0101211	261895312	2016-01-18	2016-02-15	28	K65.1	Peritoneal abscess	6	N	A41.9, D65, J96.01, N17.0, R65.21, K65.1
0101211	261895312	2016-01-18	2016-02-15	28	K81.0	Acute cholecystitis	7	N	A41.9, D65, J96.01, N17.0, R65.21, K65.1, K81.0
0101211	261895312	2016-01-18	2016-02-15	28	N18.3	Chronic kidney disease, stage 3 (moderate)	8	Y	A41.9, D65, J96.01, N17.0, R65.21, K65.1, K81.0, N18.3
0101211	261895312	2016-01-18	2016-02-15	28	D69.6	Thrombocytopenia, unspecified	9	N	A41.9, D65, J96.01, N17.0, R65.21, K65.1, K81.0, N18.3, D69.6
0101211	261895312	2016-01-18	2016-02-15	28	I48.92	Unspecified atrial flutter	10	Y	A41.9, D65, J96.01, N17.0, R65.21, K65.1, K81.0, N18.3, D69.6, I48.92
0101211	261895312	2016-01-18	2016-02-15	28	K57.20	Diverticulitis of large intestine with perforation	11	Y	A41.9, D65, J96.01, N17.0, R65.21, K65.1, K81.0, N18.3, D69.6, I48.92, K57.20
0101211	261895312	2016-01-18	2016-02-15	28	N39.0	Urinary tract infection, site not specified	12	Y	A41.9, D65, J96.01, N17.0, R65.21, K65.1, K81.0, N18.3, D69.6, I48.92, K57.20, N39.0
0101211	261895312	2016-01-18	2016-02-15	28	I24.8	Other forms of acute ischemic heart disease	13	Y	A41.9, D65, J96.01, N17.0, R65.21, K65.1, K81.0, N18.3, D69.6, I48.92, K57.20, N39.0, I24.8
0101211	261895312	2016-01-18	2016-02-15	28	I50.20	Unspecified systolic (congestive) heart failure	14	Y	A41.9, D65, J96.01, N17.0, R65.21, K65.1, K81.0, N18.3, D69.6, I48.92, K57.20, N39.0, I24.8, I50.20
0101211	261895312	2016-01-18	2016-02-15	28	Z66	Do not resuscitate	15	N	A41.9, D65, J96.01, N17.0, R65.21, K65.1, K81.0, N18.3, D69.6, I48.92, K57.20, N39.0, I24.8, I50.20, Z66
0101211	261895312	2016-01-18	2016-02-15	28	Z51.5	Encounter for palliative care	16		A41.9, D65, J96.01, N17.0, R65.21, K65.1, K81.0, N18.3, D69.6, I48.92, K57.20, N39.0, I24.8, I50.20, Z66, Z51.5
0101211	261895312	2016-01-18	2016-02-15	28	I48.91	Unspecified atrial fibrillation	17	Y	A41.9, D65, J96.01, N17.0, R65.21, K65.1, K81.0, N18.3, D69.6, I48.92, K57.20, N39.0, I24.8, I50.20, Z66, Z51.5, I48.91
0101211	261895312	2016-01-18	2016-02-15	28	J44.9	Chronic obstructive pulmonary disease, unspecified	18	Y	A41.9, D65, J96.01, N17.0, R65.21, K65.1, K81.0, N18.3, D69.6, I48.92, K57.20, N39.0, I24.8, I50.20, Z66, Z51.5, I48.91, J44.9
0101211	261895312	2016-01-18	2016-02-15	28	J45.909	Unspecified asthma, uncomplicated	19	Y	A41.9, D65, J96.01, N17.0, R65.21, K65.1, K81.0, N18.3, D69.6, I48.92, K57.20, N39.0, I24.8, I50.20, Z66, Z51.5, I48.91, J44.9, J45.909
0101211	261895312	2016-01-18	2016-02-15	28	I27.2	Other secondary pulmonary hypertension	20	Y	A41.9, D65, J96.01, N17.0, R65.21, K65.1, K81.0, N18.3, D69.6, I48.92, K57.20, N39.0, I24.8, I50.20, Z66, Z51.5, I48.91, J44.9, J45.909, I27.2
0101211	261895312	2016-01-18	2016-02-15	28	L97.519	Non-pressure chronic ulcer of other part of right	21	Y	A41.9, D65, J96.01, N17.0, R65.21, K65.1, K81.0, N18.3, D69.6, I48.92, K57.20, N39.0, I24.8, I50.20, Z66, Z51.5, I48.91, J44.9, J45.909, I27.2, L97.519
0101211	261895312	2016-01-18	2016-02-15	28	E11.9	Type 2 diabetes mellitus without complications	22	N	A41.9, D65, J96.01, N17.0, R65.21, K65.1, K81.0, N18.3, D69.6, I48.92, K57.20, N39.0, I24.8, I50.20, Z66, Z51.5, I48.91, J44.9, J45.909, I27.2, L97.519, E11.9
0101211	261895312	2016-01-18	2016-02-15	28	D63.8	Anemia in other chronic diseases classified elsewh	23	Y	A41.9, D65, J96.01, N17.0, R65.21, K65.1, K81.0, N18.3, D69.6, I48.92, K57.20, N39.0, I24.8, I50.20, Z66, Z51.5, I48.91, J44.9, J45.909, I27.2, L97.519, E11.9, D63.8
0101211	261895312	2016-01-18	2016-02-15	28	I12.9	Hypertensive chronic kidney disease with stage 1 t	24	Y	A41.9, D65, J96.01, N17.0, R65.21, K65.1, K81.0, N18.3, D69.6, I48.92, K57.20, N39.0, I24.8, I50.20, Z66, Z51.5, I48.91, J44.9, J45.909, I27.2, L97.519, E11.9, D63.8, I12.9
0101211	261895312	2016-01-18	2016-02-15	28	Z87.891	Personal history of nicotine dependence	25		A41.9, D65, J96.01, N17.0, R65.21, K65.1, K81.0, N18.3, D69.6, I48.92, K57.20, N39.0, I24.8, I50.20, Z66, Z51.5, I48.91, J44.9, J45.909, I27.2, L97.519, E11.9, D63.8, I12.9, Z87.891	Last
0106859	261249932	2015-12-22	2015-12-26	4	K31.811	Angiodysplasia of stomach and duodenum with bleedi	1	Y	K31.811
0106859	261249932	2015-12-22	2015-12-26	4	E87.2	Acidosis	2	Y	K31.811, E87.2
0106859	261249932	2015-12-22	2015-12-26	4	I50.32	Chronic diastolic (congestive) heart failure	3	Y	K31.811, E87.2, I50.32
0106859	261249932	2015-12-22	2015-12-26	4	E87.5	Hyperkalemia	4	Y	K31.811, E87.2, I50.32, E87.5
0106859	261249932	2015-12-22	2015-12-26	4	D62	Acute posthemorrhagic anemia	5	Y	K31.811, E87.2, I50.32, E87.5, D62
0106859	261249932	2015-12-22	2015-12-26	4	I48.0	Paroxysmal atrial fibrillation	6	Y	K31.811, E87.2, I50.32, E87.5, D62, I48.0
0106859	261249932	2015-12-22	2015-12-26	4	J44.9	Chronic obstructive pulmonary disease, unspecified	7	Y	K31.811, E87.2, I50.32, E87.5, D62, I48.0, J44.9
0106859	261249932	2015-12-22	2015-12-26	4	I49.1	Atrial premature depolarization	8	Y	K31.811, E87.2, I50.32, E87.5, D62, I48.0, J44.9, I49.1
0106859	261249932	2015-12-22	2015-12-26	4	I10	Essential (primary) hypertension	9	Y	K31.811, E87.2, I50.32, E87.5, D62, I48.0, J44.9, I49.1, I10
0106859	261249932	2015-12-22	2015-12-26	4	J45.909	Unspecified asthma, uncomplicated	10	Y	K31.811, E87.2, I50.32, E87.5, D62, I48.0, J44.9, I49.1, I10, J45.909
0106859	261249932	2015-12-22	2015-12-26	4	K44.9	Diaphragmatic hernia without obstruction or gangre	11	Y	K31.811, E87.2, I50.32, E87.5, D62, I48.0, J44.9, I49.1, I10, J45.909, K44.9
0106859	261249932	2015-12-22	2015-12-26	4	E03.9	Hypothyroidism, unspecified	12	Y	K31.811, E87.2, I50.32, E87.5, D62, I48.0, J44.9, I49.1, I10, J45.909, K44.9, E03.9
0106859	261249932	2015-12-22	2015-12-26	4	E78.5	Hyperlipidemia, unspecified	13	Y	K31.811, E87.2, I50.32, E87.5, D62, I48.0, J44.9, I49.1, I10, J45.909, K44.9, E03.9, E78.5
0106859	261249932	2015-12-22	2015-12-26	4	H54.41	Blindness, right eye, normal vision left eye	14	Y	K31.811, E87.2, I50.32, E87.5, D62, I48.0, J44.9, I49.1, I10, J45.909, K44.9, E03.9, E78.5, H54.41
0106859	261249932	2015-12-22	2015-12-26	4	F03.90	Unspecified dementia without behavioral disturbanc	15	Y	K31.811, E87.2, I50.32, E87.5, D62, I48.0, J44.9, I49.1, I10, J45.909, K44.9, E03.9, E78.5, H54.41, F03.90
0106859	261249932	2015-12-22	2015-12-26	4	M19.90	Unspecified osteoarthritis, unspecified site	16	Y	K31.811, E87.2, I50.32, E87.5, D62, I48.0, J44.9, I49.1, I10, J45.909, K44.9, E03.9, E78.5, H54.41, F03.90, M19.90
0106859	261249932	2015-12-22	2015-12-26	4	Z79.01	Long term (current) use of anticoagulants	17		K31.811, E87.2, I50.32, E87.5, D62, I48.0, J44.9, I49.1, I10, J45.909, K44.9, E03.9, E78.5, H54.41, F03.90, M19.90, Z79.01
0106859	261249932	2015-12-22	2015-12-26	4	I25.2	Old myocardial infarction	18		K31.811, E87.2, I50.32, E87.5, D62, I48.0, J44.9, I49.1, I10, J45.909, K44.9, E03.9, E78.5, H54.41, F03.90, M19.90, Z79.01, I25.2	Last
0116606	262961758	2016-02-22	2016-02-27	5	A41.9	Sepsis, unspecified organism	1	Y	A41.9
0116606	262961758	2016-02-22	2016-02-27	5	R65.21	Severe sepsis with septic shock	2	Y	A41.9, R65.21
0116606	262961758	2016-02-22	2016-02-27	5	I50.33	Acute on chronic diastolic (congestive) heart fail	3	Y	A41.9, R65.21, I50.33
0116606	262961758	2016-02-22	2016-02-27	5	N17.9	Acute kidney failure, unspecified	4	Y	A41.9, R65.21, I50.33, N17.9
0116606	262961758	2016-02-22	2016-02-27	5	J18.9	Pneumonia, unspecified organism	5	Y	A41.9, R65.21, I50.33, N17.9, J18.9
0116606	262961758	2016-02-22	2016-02-27	5	E87.2	Acidosis	6	Y	A41.9, R65.21, I50.33, N17.9, J18.9, E87.2
0116606	262961758	2016-02-22	2016-02-27	5	J91.8	Pleural effusion in other conditions classified el	7	Y	A41.9, R65.21, I50.33, N17.9, J18.9, E87.2, J91.8
0116606	262961758	2016-02-22	2016-02-27	5	N39.0	Urinary tract infection, site not specified	8	Y	A41.9, R65.21, I50.33, N17.9, J18.9, E87.2, J91.8, N39.0
0116606	262961758	2016-02-22	2016-02-27	5	E11.9	Type 2 diabetes mellitus without complications	9	Y	A41.9, R65.21, I50.33, N17.9, J18.9, E87.2, J91.8, N39.0, E11.9
0116606	262961758	2016-02-22	2016-02-27	5	D64.9	Anemia, unspecified	10	Y	A41.9, R65.21, I50.33, N17.9, J18.9, E87.2, J91.8, N39.0, E11.9, D64.9
0116606	262961758	2016-02-22	2016-02-27	5	I51.81	Takotsubo syndrome	11	Y	A41.9, R65.21, I50.33, N17.9, J18.9, E87.2, J91.8, N39.0, E11.9, D64.9, I51.81
0116606	262961758	2016-02-22	2016-02-27	5	Z66	Do not resuscitate	12	N	A41.9, R65.21, I50.33, N17.9, J18.9, E87.2, J91.8, N39.0, E11.9, D64.9, I51.81, Z66
0116606	262961758	2016-02-22	2016-02-27	5	Z51.5	Encounter for palliative care	13		A41.9, R65.21, I50.33, N17.9, J18.9, E87.2, J91.8, N39.0, E11.9, D64.9, I51.81, Z66, Z51.5
0116606	262961758	2016-02-22	2016-02-27	5	E87.5	Hyperkalemia	14	Y	A41.9, R65.21, I50.33, N17.9, J18.9, E87.2, J91.8, N39.0, E11.9, D64.9, I51.81, Z66, Z51.5, E87.5
0116606	262961758	2016-02-22	2016-02-27	5	I48.0	Paroxysmal atrial fibrillation	15	Y	A41.9, R65.21, I50.33, N17.9, J18.9, E87.2, J91.8, N39.0, E11.9, D64.9, I51.81, Z66, Z51.5, E87.5, I48.0
0116606	262961758	2016-02-22	2016-02-27	5	N18.3	Chronic kidney disease, stage 3 (moderate)	16	Y	A41.9, R65.21, I50.33, N17.9, J18.9, E87.2, J91.8, N39.0, E11.9, D64.9, I51.81, Z66, Z51.5, E87.5, I48.0, N18.3
0116606	262961758	2016-02-22	2016-02-27	5	I12.9	Hypertensive chronic kidney disease with stage 1 t	17	Y	A41.9, R65.21, I50.33, N17.9, J18.9, E87.2, J91.8, N39.0, E11.9, D64.9, I51.81, Z66, Z51.5, E87.5, I48.0, N18.3, I12.9
0116606	262961758	2016-02-22	2016-02-27	5	G47.33	Obstructive sleep apnea (adult) (pediatric)	18	Y	A41.9, R65.21, I50.33, N17.9, J18.9, E87.2, J91.8, N39.0, E11.9, D64.9, I51.81, Z66, Z51.5, E87.5, I48.0, N18.3, I12.9, G47.33
0116606	262961758	2016-02-22	2016-02-27	5	R41.0	Disorientation, unspecified	19	N	A41.9, R65.21, I50.33, N17.9, J18.9, E87.2, J91.8, N39.0, E11.9, D64.9, I51.81, Z66, Z51.5, E87.5, I48.0, N18.3, I12.9, G47.33, R41.0
0116606	262961758	2016-02-22	2016-02-27	5	E78.5	Hyperlipidemia, unspecified	20	Y	A41.9, R65.21, I50.33, N17.9, J18.9, E87.2, J91.8, N39.0, E11.9, D64.9, I51.81, Z66, Z51.5, E87.5, I48.0, N18.3, I12.9, G47.33, R41.0, E78.5
0116606	262961758	2016-02-22	2016-02-27	5	M10.9	Gout, unspecified	21	Y	A41.9, R65.21, I50.33, N17.9, J18.9, E87.2, J91.8, N39.0, E11.9, D64.9, I51.81, Z66, Z51.5, E87.5, I48.0, N18.3, I12.9, G47.33, R41.0, E78.5, M10.9
0116606	262961758	2016-02-22	2016-02-27	5	Z93.3	Colostomy status	22		A41.9, R65.21, I50.33, N17.9, J18.9, E87.2, J91.8, N39.0, E11.9, D64.9, I51.81, Z66, Z51.5, E87.5, I48.0, N18.3, I12.9, G47.33, R41.0, E78.5, M10.9, Z93.3
0116606	262961758	2016-02-22	2016-02-27	5	Y95	Nosocomial condition	23	Y	A41.9, R65.21, I50.33, N17.9, J18.9, E87.2, J91.8, N39.0, E11.9, D64.9, I51.81, Z66, Z51.5, E87.5, I48.0, N18.3, I12.9, G47.33, R41.0, E78.5, M10.9, Z93.3, Y95
0116606	262961758	2016-02-22	2016-02-27	5	Z79.01	Long term (current) use of anticoagulants	24		A41.9, R65.21, I50.33, N17.9, J18.9, E87.2, J91.8, N39.0, E11.9, D64.9, I51.81, Z66, Z51.5, E87.5, I48.0, N18.3, I12.9, G47.33, R41.0, E78.5, M10.9, Z93.3, Y95, Z79.01
0116606	262961758	2016-02-22	2016-02-27	5	Z86.73	Personal history of transient ischemic attack (TIA	25		A41.9, R65.21, I50.33, N17.9, J18.9, E87.2, J91.8, N39.0, E11.9, D64.9, I51.81, Z66, Z51.5, E87.5, I48.0, N18.3, I12.9, G47.33, R41.0, E78.5, M10.9, Z93.3, Y95, Z79.01, Z86.73	Last
0117456	261316541	2015-12-25	2015-12-29	4	B37.81	Candidal esophagitis	1	Y	B37.81
0117456	261316541	2015-12-25	2015-12-29	4	E87.2	Acidosis	2	Y	B37.81, E87.2
0117456	261316541	2015-12-25	2015-12-29	4	N39.0	Urinary tract infection, site not specified	3	Y	B37.81, E87.2, N39.0
0117456	261316541	2015-12-25	2015-12-29	4	R71.0	Precipitous drop in hematocrit	4	Y	B37.81, E87.2, N39.0, R71.0
0117456	261316541	2015-12-25	2015-12-29	4	E53.8	Deficiency of other specified B group vitamins	5	Y	B37.81, E87.2, N39.0, R71.0, E53.8
0117456	261316541	2015-12-25	2015-12-29	4	N18.3	Chronic kidney disease, stage 3 (moderate)	6	Y	B37.81, E87.2, N39.0, R71.0, E53.8, N18.3
0117456	261316541	2015-12-25	2015-12-29	4	R13.10	Dysphagia, unspecified	7	Y	B37.81, E87.2, N39.0, R71.0, E53.8, N18.3, R13.10
0117456	261316541	2015-12-25	2015-12-29	4	R07.89	Other chest pain	8	Y	B37.81, E87.2, N39.0, R71.0, E53.8, N18.3, R13.10, R07.89
0117456	261316541	2015-12-25	2015-12-29	4	I25.10	Atherosclerotic heart disease of native coronary a	9	Y	B37.81, E87.2, N39.0, R71.0, E53.8, N18.3, R13.10, R07.89, I25.10
0117456	261316541	2015-12-25	2015-12-29	4	I12.9	Hypertensive chronic kidney disease with stage 1 t	10	Y	B37.81, E87.2, N39.0, R71.0, E53.8, N18.3, R13.10, R07.89, I25.10, I12.9
0117456	261316541	2015-12-25	2015-12-29	4	Z95.5	Presence of coronary angioplasty implant and graft	11		B37.81, E87.2, N39.0, R71.0, E53.8, N18.3, R13.10, R07.89, I25.10, I12.9, Z95.5
0117456	261316541	2015-12-25	2015-12-29	4	D50.9	Iron deficiency anemia, unspecified	12	Y	B37.81, E87.2, N39.0, R71.0, E53.8, N18.3, R13.10, R07.89, I25.10, I12.9, Z95.5, D50.9
0117456	261316541	2015-12-25	2015-12-29	4	K64.9	Unspecified hemorrhoids	13	Y	B37.81, E87.2, N39.0, R71.0, E53.8, N18.3, R13.10, R07.89, I25.10, I12.9, Z95.5, D50.9, K64.9
0117456	261316541	2015-12-25	2015-12-29	4	R23.3	Spontaneous ecchymoses	14	Y	B37.81, E87.2, N39.0, R71.0, E53.8, N18.3, R13.10, R07.89, I25.10, I12.9, Z95.5, D50.9, K64.9, R23.3
0117456	261316541	2015-12-25	2015-12-29	4	F32.9	Major depressive disorder, single episode, unspeci	15	Y	B37.81, E87.2, N39.0, R71.0, E53.8, N18.3, R13.10, R07.89, I25.10, I12.9, Z95.5, D50.9, K64.9, R23.3, F32.9
0117456	261316541	2015-12-25	2015-12-29	4	F41.9	Anxiety disorder, unspecified	16	Y	B37.81, E87.2, N39.0, R71.0, E53.8, N18.3, R13.10, R07.89, I25.10, I12.9, Z95.5, D50.9, K64.9, R23.3, F32.9, F41.9
0117456	261316541	2015-12-25	2015-12-29	4	Z87.891	Personal history of nicotine dependence	17		B37.81, E87.2, N39.0, R71.0, E53.8, N18.3, R13.10, R07.89, I25.10, I12.9, Z95.5, D50.9, K64.9, R23.3, F32.9, F41.9, Z87.891
0117456	261316541	2015-12-25	2015-12-29	4	Z90.49	Acquired absence of other specified parts of diges	18	Y	B37.81, E87.2, N39.0, R71.0, E53.8, N18.3, R13.10, R07.89, I25.10, I12.9, Z95.5, D50.9, K64.9, R23.3, F32.9, F41.9, Z87.891, Z90.49
0117456	261316541	2015-12-25	2015-12-29	4	K20.8	Other esophagitis	19	Y	B37.81, E87.2, N39.0, R71.0, E53.8, N18.3, R13.10, R07.89, I25.10, I12.9, Z95.5, D50.9, K64.9, R23.3, F32.9, F41.9, Z87.891, Z90.49, K20.8
0117456	261316541	2015-12-25	2015-12-29	4	K29.80	Duodenitis without bleeding	20	Y	B37.81, E87.2, N39.0, R71.0, E53.8, N18.3, R13.10, R07.89, I25.10, I12.9, Z95.5, D50.9, K64.9, R23.3, F32.9, F41.9, Z87.891, Z90.49, K20.8, K29.80
0117456	261316541	2015-12-25	2015-12-29	4	K29.60	Other gastritis without bleeding	21	Y	B37.81, E87.2, N39.0, R71.0, E53.8, N18.3, R13.10, R07.89, I25.10, I12.9, Z95.5, D50.9, K64.9, R23.3, F32.9, F41.9, Z87.891, Z90.49, K20.8, K29.80, K29.60
0117456	261316541	2015-12-25	2015-12-29	4	K44.9	Diaphragmatic hernia without obstruction or gangre	22	Y	B37.81, E87.2, N39.0, R71.0, E53.8, N18.3, R13.10, R07.89, I25.10, I12.9, Z95.5, D50.9, K64.9, R23.3, F32.9, F41.9, Z87.891, Z90.49, K20.8, K29.80, K29.60, K44.9
0117456	261316541	2015-12-25	2015-12-29	4	B95.1	Streptococcus, group B, as the cause of diseases c	23	Y	B37.81, E87.2, N39.0, R71.0, E53.8, N18.3, R13.10, R07.89, I25.10, I12.9, Z95.5, D50.9, K64.9, R23.3, F32.9, F41.9, Z87.891, Z90.49, K20.8, K29.80, K29.60, K44.9, B95.1
0117456	261316541	2015-12-25	2015-12-29	4	E03.9	Hypothyroidism, unspecified	24	Y	B37.81, E87.2, N39.0, R71.0, E53.8, N18.3, R13.10, R07.89, I25.10, I12.9, Z95.5, D50.9, K64.9, R23.3, F32.9, F41.9, Z87.891, Z90.49, K20.8, K29.80, K29.60, K44.9, B95.1, E03.9
0117456	261316541	2015-12-25	2015-12-29	4	E78.5	Hyperlipidemia, unspecified	25	Y	B37.81, E87.2, N39.0, R71.0, E53.8, N18.3, R13.10, R07.89, I25.10, I12.9, Z95.5, D50.9, K64.9, R23.3, F32.9, F41.9, Z87.891, Z90.49, K20.8, K29.80, K29.60, K44.9, B95.1, E03.9, E78.5
0117456	261316541	2015-12-25	2015-12-29	4	Z86.14	Personal history of Methicillin resistant Staphylo	26		B37.81, E87.2, N39.0, R71.0, E53.8, N18.3, R13.10, R07.89, I25.10, I12.9, Z95.5, D50.9, K64.9, R23.3, F32.9, F41.9, Z87.891, Z90.49, K20.8, K29.80, K29.60, K44.9, B95.1, E03.9, E78.5, Z86.14
0117456	261316541	2015-12-25	2015-12-29	4	I34.0	Nonrheumatic mitral (valve) insufficiency	27	Y	B37.81, E87.2, N39.0, R71.0, E53.8, N18.3, R13.10, R07.89, I25.10, I12.9, Z95.5, D50.9, K64.9, R23.3, F32.9, F41.9, Z87.891, Z90.49, K20.8, K29.80, K29.60, K44.9, B95.1, E03.9, E78.5, Z86.14, I34.0
0117456	261316541	2015-12-25	2015-12-29	4	Z79.82	Long term (current) use of aspirin	28		B37.81, E87.2, N39.0, R71.0, E53.8, N18.3, R13.10, R07.89, I25.10, I12.9, Z95.5, D50.9, K64.9, R23.3, F32.9, F41.9, Z87.891, Z90.49, K20.8, K29.80, K29.60, K44.9, B95.1, E03.9, E78.5, Z86.14, I34.0, Z79.82
0117456	261316541	2015-12-25	2015-12-29	4	R19.7	Diarrhea, unspecified	29	Y	B37.81, E87.2, N39.0, R71.0, E53.8, N18.3, R13.10, R07.89, I25.10, I12.9, Z95.5, D50.9, K64.9, R23.3, F32.9, F41.9, Z87.891, Z90.49, K20.8, K29.80, K29.60, K44.9, B95.1, E03.9, E78.5, Z86.14, I34.0, Z79.82, R19.7
0117456	261316541	2015-12-25	2015-12-29	4	S82.92XA	Unspecified fracture of left lower leg, initial en	30	Y	B37.81, E87.2, N39.0, R71.0, E53.8, N18.3, R13.10, R07.89, I25.10, I12.9, Z95.5, D50.9, K64.9, R23.3, F32.9, F41.9, Z87.891, Z90.49, K20.8, K29.80, K29.60, K44.9, B95.1, E03.9, E78.5, Z86.14, I34.0, Z79.82, R19.7, S82.92XA	Last
0117456	261459952	2016-01-01	2016-01-05	4	A41.9	Sepsis, unspecified organism	1	Y	A41.9
0117456	261459952	2016-01-01	2016-01-05	4	E87.2	Acidosis	2	Y	A41.9, E87.2
0117456	261459952	2016-01-01	2016-01-05	4	N17.9	Acute kidney failure, unspecified	3	Y	A41.9, E87.2, N17.9
0117456	261459952	2016-01-01	2016-01-05	4	A04.7	Enterocolitis due to Clostridium difficile	4	Y	A41.9, E87.2, N17.9, A04.7
0117456	261459952	2016-01-01	2016-01-05	4	K22.70	Barretts esophagus without dysplasia	5	Y	A41.9, E87.2, N17.9, A04.7, K22.70
0117456	261459952	2016-01-01	2016-01-05	4	D51.9	Vitamin B12 deficiency anemia, unspecified	6	Y	A41.9, E87.2, N17.9, A04.7, K22.70, D51.9
0117456	261459952	2016-01-01	2016-01-05	4	E83.51	Hypocalcemia	7	Y	A41.9, E87.2, N17.9, A04.7, K22.70, D51.9, E83.51
0117456	261459952	2016-01-01	2016-01-05	4	N18.3	Chronic kidney disease, stage 3 (moderate)	8	Y	A41.9, E87.2, N17.9, A04.7, K22.70, D51.9, E83.51, N18.3
0117456	261459952	2016-01-01	2016-01-05	4	N39.0	Urinary tract infection, site not specified	9	Y	A41.9, E87.2, N17.9, A04.7, K22.70, D51.9, E83.51, N18.3, N39.0
0117456	261459952	2016-01-01	2016-01-05	4	I25.10	Atherosclerotic heart disease of native coronary a	10	Y	A41.9, E87.2, N17.9, A04.7, K22.70, D51.9, E83.51, N18.3, N39.0, I25.10
0117456	261459952	2016-01-01	2016-01-05	4	Z95.5	Presence of coronary angioplasty implant and graft	11		A41.9, E87.2, N17.9, A04.7, K22.70, D51.9, E83.51, N18.3, N39.0, I25.10, Z95.5
0117456	261459952	2016-01-01	2016-01-05	4	I12.9	Hypertensive chronic kidney disease with stage 1 t	12	Y	A41.9, E87.2, N17.9, A04.7, K22.70, D51.9, E83.51, N18.3, N39.0, I25.10, Z95.5, I12.9
0117456	261459952	2016-01-01	2016-01-05	4	D50.9	Iron deficiency anemia, unspecified	13	Y	A41.9, E87.2, N17.9, A04.7, K22.70, D51.9, E83.51, N18.3, N39.0, I25.10, Z95.5, I12.9, D50.9
0117456	261459952	2016-01-01	2016-01-05	4	E78.5	Hyperlipidemia, unspecified	14	Y	A41.9, E87.2, N17.9, A04.7, K22.70, D51.9, E83.51, N18.3, N39.0, I25.10, Z95.5, I12.9, D50.9, E78.5
0117456	261459952	2016-01-01	2016-01-05	4	E03.9	Hypothyroidism, unspecified	15	Y	A41.9, E87.2, N17.9, A04.7, K22.70, D51.9, E83.51, N18.3, N39.0, I25.10, Z95.5, I12.9, D50.9, E78.5, E03.9
0117456	261459952	2016-01-01	2016-01-05	4	E86.0	Dehydration	16	Y	A41.9, E87.2, N17.9, A04.7, K22.70, D51.9, E83.51, N18.3, N39.0, I25.10, Z95.5, I12.9, D50.9, E78.5, E03.9, E86.0
0117456	261459952	2016-01-01	2016-01-05	4	Z93.3	Colostomy status	17		A41.9, E87.2, N17.9, A04.7, K22.70, D51.9, E83.51, N18.3, N39.0, I25.10, Z95.5, I12.9, D50.9, E78.5, E03.9, E86.0, Z93.3
0117456	261459952	2016-01-01	2016-01-05	4	Z79.82	Long term (current) use of aspirin	18		A41.9, E87.2, N17.9, A04.7, K22.70, D51.9, E83.51, N18.3, N39.0, I25.10, Z95.5, I12.9, D50.9, E78.5, E03.9, E86.0, Z93.3, Z79.82
0117456	261459952	2016-01-01	2016-01-05	4	Z87.440	Personal history of urinary (tract) infections	19		A41.9, E87.2, N17.9, A04.7, K22.70, D51.9, E83.51, N18.3, N39.0, I25.10, Z95.5, I12.9, D50.9, E78.5, E03.9, E86.0, Z93.3, Z79.82, Z87.440	Last
0119422	261604219	2016-01-06	2016-01-12	6	K50.90	Crohns disease, unspecified, without complications	1	Y	K50.90
0119422	261604219	2016-01-06	2016-01-12	6	K56.69	Other intestinal obstruction	2	Y	K50.90, K56.69
0119422	261604219	2016-01-06	2016-01-12	6	N17.9	Acute kidney failure, unspecified	3	Y	K50.90, K56.69, N17.9
0119422	261604219	2016-01-06	2016-01-12	6	A04.7	Enterocolitis due to Clostridium difficile	4	Y	K50.90, K56.69, N17.9, A04.7
0119422	261604219	2016-01-06	2016-01-12	6	E87.2	Acidosis	5	Y	K50.90, K56.69, N17.9, A04.7, E87.2
0119422	261604219	2016-01-06	2016-01-12	6	N18.3	Chronic kidney disease, stage 3 (moderate)	6	Y	K50.90, K56.69, N17.9, A04.7, E87.2, N18.3
0119422	261604219	2016-01-06	2016-01-12	6	E87.6	Hypokalemia	7	Y	K50.90, K56.69, N17.9, A04.7, E87.2, N18.3, E87.6
0119422	261604219	2016-01-06	2016-01-12	6	F17.210	Nicotine dependence, cigarettes, uncomplicated	8	Y	K50.90, K56.69, N17.9, A04.7, E87.2, N18.3, E87.6, F17.210
0119422	261604219	2016-01-06	2016-01-12	6	I12.9	Hypertensive chronic kidney disease with stage 1 t	9	Y	K50.90, K56.69, N17.9, A04.7, E87.2, N18.3, E87.6, F17.210, I12.9
0119422	261604219	2016-01-06	2016-01-12	6	K21.9	Gastro-esophageal reflux disease without esophagit	10	Y	K50.90, K56.69, N17.9, A04.7, E87.2, N18.3, E87.6, F17.210, I12.9, K21.9
0119422	261604219	2016-01-06	2016-01-12	6	Z88.0	Allergy status to penicillin	11		K50.90, K56.69, N17.9, A04.7, E87.2, N18.3, E87.6, F17.210, I12.9, K21.9, Z88.0
0119422	261604219	2016-01-06	2016-01-12	6	Z88.2	Allergy status to sulfonamides status	12		K50.90, K56.69, N17.9, A04.7, E87.2, N18.3, E87.6, F17.210, I12.9, K21.9, Z88.0, Z88.2
0119422	261604219	2016-01-06	2016-01-12	6	Z88.8	Allergy status to other drugs, medicaments and bio	13		K50.90, K56.69, N17.9, A04.7, E87.2, N18.3, E87.6, F17.210, I12.9, K21.9, Z88.0, Z88.2, Z88.8	Last
0119639	259084093	2015-10-06	2015-10-16	10	I63.9	Cerebral infarction, unspecified	1	Y	I63.9
0119639	259084093	2015-10-06	2015-10-16	10	J96.01	Acute respiratory failure with hypoxia	2	Y	I63.9, J96.01
0119639	259084093	2015-10-06	2015-10-16	10	R40.20	Unspecified coma	3	Y	I63.9, J96.01, R40.20
0119639	259084093	2015-10-06	2015-10-16	10	N17.9	Acute kidney failure, unspecified	4	Y	I63.9, J96.01, R40.20, N17.9
0119639	259084093	2015-10-06	2015-10-16	10	I47.2	Ventricular tachycardia	5	N	I63.9, J96.01, R40.20, N17.9, I47.2
0119639	259084093	2015-10-06	2015-10-16	10	E87.0	Hyperosmolality and hypernatremia	6	N	I63.9, J96.01, R40.20, N17.9, I47.2, E87.0
0119639	259084093	2015-10-06	2015-10-16	10	E11.65	Type 2 diabetes mellitus with hyperglycemia	7	Y	I63.9, J96.01, R40.20, N17.9, I47.2, E87.0, E11.65
0119639	259084093	2015-10-06	2015-10-16	10	I48.92	Unspecified atrial flutter	8	N	I63.9, J96.01, R40.20, N17.9, I47.2, E87.0, E11.65, I48.92
0119639	259084093	2015-10-06	2015-10-16	10	I69.354	Hemiplegia and hemiparesis following cerebral infa	9		I63.9, J96.01, R40.20, N17.9, I47.2, E87.0, E11.65, I48.92, I69.354
0119639	259084093	2015-10-06	2015-10-16	10	I48.1	Persistent atrial fibrillation	10	Y	I63.9, J96.01, R40.20, N17.9, I47.2, E87.0, E11.65, I48.92, I69.354, I48.1
0119639	259084093	2015-10-06	2015-10-16	10	I50.9	Heart failure, unspecified	11	Y	I63.9, J96.01, R40.20, N17.9, I47.2, E87.0, E11.65, I48.92, I69.354, I48.1, I50.9
0119639	259084093	2015-10-06	2015-10-16	10	Z99.81	Dependence on supplemental oxygen	12		I63.9, J96.01, R40.20, N17.9, I47.2, E87.0, E11.65, I48.92, I69.354, I48.1, I50.9, Z99.81
0119639	259084093	2015-10-06	2015-10-16	10	J44.9	Chronic obstructive pulmonary disease, unspecified	13	Y	I63.9, J96.01, R40.20, N17.9, I47.2, E87.0, E11.65, I48.92, I69.354, I48.1, I50.9, Z99.81, J44.9
0119639	259084093	2015-10-06	2015-10-16	10	E66.01	Morbid (severe) obesity due to excess calories	14	Y	I63.9, J96.01, R40.20, N17.9, I47.2, E87.0, E11.65, I48.92, I69.354, I48.1, I50.9, Z99.81, J44.9, E66.01
0119639	259084093	2015-10-06	2015-10-16	10	I51.3	Intracardiac thrombosis, not elsewhere classified	15	Y	I63.9, J96.01, R40.20, N17.9, I47.2, E87.0, E11.65, I48.92, I69.354, I48.1, I50.9, Z99.81, J44.9, E66.01, I51.3
0119639	259084093	2015-10-06	2015-10-16	10	I25.10	Atherosclerotic heart disease of native coronary a	16	Y	I63.9, J96.01, R40.20, N17.9, I47.2, E87.0, E11.65, I48.92, I69.354, I48.1, I50.9, Z99.81, J44.9, E66.01, I51.3, I25.10
0119639	259084093	2015-10-06	2015-10-16	10	E78.5	Hyperlipidemia, unspecified	17	Y	I63.9, J96.01, R40.20, N17.9, I47.2, E87.0, E11.65, I48.92, I69.354, I48.1, I50.9, Z99.81, J44.9, E66.01, I51.3, I25.10, E78.5
0119639	259084093	2015-10-06	2015-10-16	10	G47.33	Obstructive sleep apnea (adult) (pediatric)	18	Y	I63.9, J96.01, R40.20, N17.9, I47.2, E87.0, E11.65, I48.92, I69.354, I48.1, I50.9, Z99.81, J44.9, E66.01, I51.3, I25.10, E78.5, G47.33
0119639	259084093	2015-10-06	2015-10-16	10	I45.10	Unspecified right bundle-branch block	19	N	I63.9, J96.01, R40.20, N17.9, I47.2, E87.0, E11.65, I48.92, I69.354, I48.1, I50.9, Z99.81, J44.9, E66.01, I51.3, I25.10, E78.5, G47.33, I45.10
0119639	259084093	2015-10-06	2015-10-16	10	Z91.19	Patients noncompliance with other medical treatmen	20	Y	I63.9, J96.01, R40.20, N17.9, I47.2, E87.0, E11.65, I48.92, I69.354, I48.1, I50.9, Z99.81, J44.9, E66.01, I51.3, I25.10, E78.5, G47.33, I45.10, Z91.19
0119639	259084093	2015-10-06	2015-10-16	10	Z66	Do not resuscitate	21	Y	I63.9, J96.01, R40.20, N17.9, I47.2, E87.0, E11.65, I48.92, I69.354, I48.1, I50.9, Z99.81, J44.9, E66.01, I51.3, I25.10, E78.5, G47.33, I45.10, Z91.19, Z66
0119639	259084093	2015-10-06	2015-10-16	10	R47.02	Dysphasia	22	N	I63.9, J96.01, R40.20, N17.9, I47.2, E87.0, E11.65, I48.92, I69.354, I48.1, I50.9, Z99.81, J44.9, E66.01, I51.3, I25.10, E78.5, G47.33, I45.10, Z91.19, Z66, R47.02
0119639	259084093	2015-10-06	2015-10-16	10	I65.23	Occlusion and stenosis of bilateral carotid arteri	23	Y	I63.9, J96.01, R40.20, N17.9, I47.2, E87.0, E11.65, I48.92, I69.354, I48.1, I50.9, Z99.81, J44.9, E66.01, I51.3, I25.10, E78.5, G47.33, I45.10, Z91.19, Z66, R47.02, I65.23
0119639	259084093	2015-10-06	2015-10-16	10	I12.9	Hypertensive chronic kidney disease with stage 1 t	24	Y	I63.9, J96.01, R40.20, N17.9, I47.2, E87.0, E11.65, I48.92, I69.354, I48.1, I50.9, Z99.81, J44.9, E66.01, I51.3, I25.10, E78.5, G47.33, I45.10, Z91.19, Z66, R47.02, I65.23, I12.9
0119639	259084093	2015-10-06	2015-10-16	10	N18.9	Chronic kidney disease, unspecified	25	Y	I63.9, J96.01, R40.20, N17.9, I47.2, E87.0, E11.65, I48.92, I69.354, I48.1, I50.9, Z99.81, J44.9, E66.01, I51.3, I25.10, E78.5, G47.33, I45.10, Z91.19, Z66, R47.02, I65.23, I12.9, N18.9
0119639	259084093	2015-10-06	2015-10-16	10	Z68.37	Body mass index (BMI) 37.0-37.9, adult	26		I63.9, J96.01, R40.20, N17.9, I47.2, E87.0, E11.65, I48.92, I69.354, I48.1, I50.9, Z99.81, J44.9, E66.01, I51.3, I25.10, E78.5, G47.33, I45.10, Z91.19, Z66, R47.02, I65.23, I12.9, N18.9, Z68.37
0119639	259084093	2015-10-06	2015-10-16	10	J45.909	Unspecified asthma, uncomplicated	27	Y	I63.9, J96.01, R40.20, N17.9, I47.2, E87.0, E11.65, I48.92, I69.354, I48.1, I50.9, Z99.81, J44.9, E66.01, I51.3, I25.10, E78.5, G47.33, I45.10, Z91.19, Z66, R47.02, I65.23, I12.9, N18.9, Z68.37, J45.909
0119639	259084093	2015-10-06	2015-10-16	10	Z95.1	Presence of aortocoronary bypass graft	28		I63.9, J96.01, R40.20, N17.9, I47.2, E87.0, E11.65, I48.92, I69.354, I48.1, I50.9, Z99.81, J44.9, E66.01, I51.3, I25.10, E78.5, G47.33, I45.10, Z91.19, Z66, R47.02, I65.23, I12.9, N18.9, Z68.37, J45.909, Z95.1
0119639	259084093	2015-10-06	2015-10-16	10	I25.2	Old myocardial infarction	29		I63.9, J96.01, R40.20, N17.9, I47.2, E87.0, E11.65, I48.92, I69.354, I48.1, I50.9, Z99.81, J44.9, E66.01, I51.3, I25.10, E78.5, G47.33, I45.10, Z91.19, Z66, R47.02, I65.23, I12.9, N18.9, Z68.37, J45.909, Z95.1, I25.2
0119639	259084093	2015-10-06	2015-10-16	10	Z79.4	Long term (current) use of insulin	30		I63.9, J96.01, R40.20, N17.9, I47.2, E87.0, E11.65, I48.92, I69.354, I48.1, I50.9, Z99.81, J44.9, E66.01, I51.3, I25.10, E78.5, G47.33, I45.10, Z91.19, Z66, R47.02, I65.23, I12.9, N18.9, Z68.37, J45.909, Z95.1, I25.2, Z79.4	Last
0121241	262763097	2016-02-16	2016-03-09	22	I50.33	Acute on chronic diastolic (congestive) heart fail	1	N	I50.33
0121241	262763097	2016-02-16	2016-03-09	22	J96.21	Acute and chronic respiratory failure with hypoxia	2	Y	I50.33, J96.21
0121241	262763097	2016-02-16	2016-03-09	22	J18.9	Pneumonia, unspecified organism	3	Y	I50.33, J96.21, J18.9
0121241	262763097	2016-02-16	2016-03-09	22	B37.0	Candidal stomatitis	4	N	I50.33, J96.21, J18.9, B37.0
0121241	262763097	2016-02-16	2016-03-09	22	E11.65	Type 2 diabetes mellitus with hyperglycemia	5	Y	I50.33, J96.21, J18.9, B37.0, E11.65
0121241	262763097	2016-02-16	2016-03-09	22	E88.81	Metabolic syndrome	6	N	I50.33, J96.21, J18.9, B37.0, E11.65, E88.81
0121241	262763097	2016-02-16	2016-03-09	22	J96.22	Acute and chronic respiratory failure with hyperca	7	Y	I50.33, J96.21, J18.9, B37.0, E11.65, E88.81, J96.22
0121241	262763097	2016-02-16	2016-03-09	22	E66.2	Morbid (severe) obesity with alveolar hypoventilat	8	Y	I50.33, J96.21, J18.9, B37.0, E11.65, E88.81, J96.22, E66.2
0121241	262763097	2016-02-16	2016-03-09	22	F11.20	Opioid dependence, uncomplicated	9	Y	I50.33, J96.21, J18.9, B37.0, E11.65, E88.81, J96.22, E66.2, F11.20
0121241	262763097	2016-02-16	2016-03-09	22	J44.1	Chronic obstructive pulmonary disease with (acute)	10	Y	I50.33, J96.21, J18.9, B37.0, E11.65, E88.81, J96.22, E66.2, F11.20, J44.1
0121241	262763097	2016-02-16	2016-03-09	22	Z68.45	Body mass index (BMI) 70 or greater, adult	11		I50.33, J96.21, J18.9, B37.0, E11.65, E88.81, J96.22, E66.2, F11.20, J44.1, Z68.45
0121241	262763097	2016-02-16	2016-03-09	22	L97.229	Non-pressure chronic ulcer of left calf with unspe	12	Y	I50.33, J96.21, J18.9, B37.0, E11.65, E88.81, J96.22, E66.2, F11.20, J44.1, Z68.45, L97.229
0121241	262763097	2016-02-16	2016-03-09	22	I27.2	Other secondary pulmonary hypertension	13	Y	I50.33, J96.21, J18.9, B37.0, E11.65, E88.81, J96.22, E66.2, F11.20, J44.1, Z68.45, L97.229, I27.2
0121241	262763097	2016-02-16	2016-03-09	22	Z99.81	Dependence on supplemental oxygen	14		I50.33, J96.21, J18.9, B37.0, E11.65, E88.81, J96.22, E66.2, F11.20, J44.1, Z68.45, L97.229, I27.2, Z99.81
0121241	262763097	2016-02-16	2016-03-09	22	E03.9	Hypothyroidism, unspecified	15	Y	I50.33, J96.21, J18.9, B37.0, E11.65, E88.81, J96.22, E66.2, F11.20, J44.1, Z68.45, L97.229, I27.2, Z99.81, E03.9
0121241	262763097	2016-02-16	2016-03-09	22	I89.0	Lymphedema, not elsewhere classified	16	Y	I50.33, J96.21, J18.9, B37.0, E11.65, E88.81, J96.22, E66.2, F11.20, J44.1, Z68.45, L97.229, I27.2, Z99.81, E03.9, I89.0
0121241	262763097	2016-02-16	2016-03-09	22	I10	Essential (primary) hypertension	17	Y	I50.33, J96.21, J18.9, B37.0, E11.65, E88.81, J96.22, E66.2, F11.20, J44.1, Z68.45, L97.229, I27.2, Z99.81, E03.9, I89.0, I10
0121241	262763097	2016-02-16	2016-03-09	22	Y95	Nosocomial condition	18	Y	I50.33, J96.21, J18.9, B37.0, E11.65, E88.81, J96.22, E66.2, F11.20, J44.1, Z68.45, L97.229, I27.2, Z99.81, E03.9, I89.0, I10, Y95
0121241	262763097	2016-02-16	2016-03-09	22	Z79.4	Long term (current) use of insulin	19		I50.33, J96.21, J18.9, B37.0, E11.65, E88.81, J96.22, E66.2, F11.20, J44.1, Z68.45, L97.229, I27.2, Z99.81, E03.9, I89.0, I10, Y95, Z79.4
0121241	262763097	2016-02-16	2016-03-09	22	Z87.891	Personal history of nicotine dependence	20		I50.33, J96.21, J18.9, B37.0, E11.65, E88.81, J96.22, E66.2, F11.20, J44.1, Z68.45, L97.229, I27.2, Z99.81, E03.9, I89.0, I10, Y95, Z79.4, Z87.891
0121241	262763097	2016-02-16	2016-03-09	22	K59.00	Constipation, unspecified	21	Y	I50.33, J96.21, J18.9, B37.0, E11.65, E88.81, J96.22, E66.2, F11.20, J44.1, Z68.45, L97.229, I27.2, Z99.81, E03.9, I89.0, I10, Y95, Z79.4, Z87.891, K59.00
0121241	262763097	2016-02-16	2016-03-09	22	I87.2	Venous insufficiency (chronic) (peripheral)	22	Y	I50.33, J96.21, J18.9, B37.0, E11.65, E88.81, J96.22, E66.2, F11.20, J44.1, Z68.45, L97.229, I27.2, Z99.81, E03.9, I89.0, I10, Y95, Z79.4, Z87.891, K59.00, I87.2
0121241	262763097	2016-02-16	2016-03-09	22	Z88.0	Allergy status to penicillin	23		I50.33, J96.21, J18.9, B37.0, E11.65, E88.81, J96.22, E66.2, F11.20, J44.1, Z68.45, L97.229, I27.2, Z99.81, E03.9, I89.0, I10, Y95, Z79.4, Z87.891, K59.00, I87.2, Z88.0
0121241	262763097	2016-02-16	2016-03-09	22	G89.29	Other chronic pain	24	Y	I50.33, J96.21, J18.9, B37.0, E11.65, E88.81, J96.22, E66.2, F11.20, J44.1, Z68.45, L97.229, I27.2, Z99.81, E03.9, I89.0, I10, Y95, Z79.4, Z87.891, K59.00, I87.2, Z88.0, G89.29
0121241	262763097	2016-02-16	2016-03-09	22	Z91.19	Patients noncompliance with other medical treatmen	25	Y	I50.33, J96.21, J18.9, B37.0, E11.65, E88.81, J96.22, E66.2, F11.20, J44.1, Z68.45, L97.229, I27.2, Z99.81, E03.9, I89.0, I10, Y95, Z79.4, Z87.891, K59.00, I87.2, Z88.0, G89.29, Z91.19
0121241	262763097	2016-02-16	2016-03-09	22	F32.9	Major depressive disorder, single episode, unspeci	26	Y	I50.33, J96.21, J18.9, B37.0, E11.65, E88.81, J96.22, E66.2, F11.20, J44.1, Z68.45, L97.229, I27.2, Z99.81, E03.9, I89.0, I10, Y95, Z79.4, Z87.891, K59.00, I87.2, Z88.0, G89.29, Z91.19, F32.9
0121241	262763097	2016-02-16	2016-03-09	22	R21	Rash and other nonspecific skin eruption	27	N	I50.33, J96.21, J18.9, B37.0, E11.65, E88.81, J96.22, E66.2, F11.20, J44.1, Z68.45, L97.229, I27.2, Z99.81, E03.9, I89.0, I10, Y95, Z79.4, Z87.891, K59.00, I87.2, Z88.0, G89.29, Z91.19, F32.9, R21
0121241	262763097	2016-02-16	2016-03-09	22	K75.81	Nonalcoholic steatohepatitis (NASH)	28	Y	I50.33, J96.21, J18.9, B37.0, E11.65, E88.81, J96.22, E66.2, F11.20, J44.1, Z68.45, L97.229, I27.2, Z99.81, E03.9, I89.0, I10, Y95, Z79.4, Z87.891, K59.00, I87.2, Z88.0, G89.29, Z91.19, F32.9, R21, K75.81	Last
0125315	261999775	2016-01-20	2016-02-19	30	J96.21	Acute and chronic respiratory failure with hypoxia	1	Y	J96.21
0125315	261999775	2016-01-20	2016-02-19	30	R65.20	Severe sepsis without septic shock	2	N	J96.21, R65.20
0125315	261999775	2016-01-20	2016-02-19	30	J85.2	Abscess of lung without pneumonia	3	Y	J96.21, R65.20, J85.2
0125315	261999775	2016-01-20	2016-02-19	30	I50.33	Acute on chronic diastolic (congestive) heart fail	4	Y	J96.21, R65.20, J85.2, I50.33
0125315	261999775	2016-01-20	2016-02-19	30	J18.9	Pneumonia, unspecified organism	5	Y	J96.21, R65.20, J85.2, I50.33, J18.9
0125315	261999775	2016-01-20	2016-02-19	30	A41.9	Sepsis, unspecified organism	6	Y	J96.21, R65.20, J85.2, I50.33, J18.9, A41.9
0125315	261999775	2016-01-20	2016-02-19	30	I27.2	Other secondary pulmonary hypertension	7	Y	J96.21, R65.20, J85.2, I50.33, J18.9, A41.9, I27.2
0125315	261999775	2016-01-20	2016-02-19	30	I08.1	Rheumatic disorders of both mitral and tricuspid v	8	Y	J96.21, R65.20, J85.2, I50.33, J18.9, A41.9, I27.2, I08.1
0125315	261999775	2016-01-20	2016-02-19	30	A04.7	Enterocolitis due to Clostridium difficile	9	N	J96.21, R65.20, J85.2, I50.33, J18.9, A41.9, I27.2, I08.1, A04.7
0125315	261999775	2016-01-20	2016-02-19	30	J44.1	Chronic obstructive pulmonary disease with (acute)	10	Y	J96.21, R65.20, J85.2, I50.33, J18.9, A41.9, I27.2, I08.1, A04.7, J44.1
0125315	261999775	2016-01-20	2016-02-19	30	J95.811	Postprocedural pneumothorax	11	N	J96.21, R65.20, J85.2, I50.33, J18.9, A41.9, I27.2, I08.1, A04.7, J44.1, J95.811
0125315	261999775	2016-01-20	2016-02-19	30	N17.9	Acute kidney failure, unspecified	12	N	J96.21, R65.20, J85.2, I50.33, J18.9, A41.9, I27.2, I08.1, A04.7, J44.1, J95.811, N17.9
0125315	261999775	2016-01-20	2016-02-19	30	J90	Pleural effusion, not elsewhere classified	13	Y	J96.21, R65.20, J85.2, I50.33, J18.9, A41.9, I27.2, I08.1, A04.7, J44.1, J95.811, N17.9, J90
0125315	261999775	2016-01-20	2016-02-19	30	Z66	Do not resuscitate	14	Y	J96.21, R65.20, J85.2, I50.33, J18.9, A41.9, I27.2, I08.1, A04.7, J44.1, J95.811, N17.9, J90, Z66
0125315	261999775	2016-01-20	2016-02-19	30	Z51.5	Encounter for palliative care	15		J96.21, R65.20, J85.2, I50.33, J18.9, A41.9, I27.2, I08.1, A04.7, J44.1, J95.811, N17.9, J90, Z66, Z51.5
0125315	261999775	2016-01-20	2016-02-19	30	J98.8	Other specified respiratory disorders	16	Y	J96.21, R65.20, J85.2, I50.33, J18.9, A41.9, I27.2, I08.1, A04.7, J44.1, J95.811, N17.9, J90, Z66, Z51.5, J98.8
0125315	261999775	2016-01-20	2016-02-19	30	I46.9	Cardiac arrest, cause unspecified	17	N	J96.21, R65.20, J85.2, I50.33, J18.9, A41.9, I27.2, I08.1, A04.7, J44.1, J95.811, N17.9, J90, Z66, Z51.5, J98.8, I46.9
0125315	261999775	2016-01-20	2016-02-19	30	J96.22	Acute and chronic respiratory failure with hyperca	18	Y	J96.21, R65.20, J85.2, I50.33, J18.9, A41.9, I27.2, I08.1, A04.7, J44.1, J95.811, N17.9, J90, Z66, Z51.5, J98.8, I46.9, J96.22
0125315	261999775	2016-01-20	2016-02-19	30	Y84.4	Aspiration of fluid as the cause of abnormal react	19	N	J96.21, R65.20, J85.2, I50.33, J18.9, A41.9, I27.2, I08.1, A04.7, J44.1, J95.811, N17.9, J90, Z66, Z51.5, J98.8, I46.9, J96.22, Y84.4
0125315	261999775	2016-01-20	2016-02-19	30	R73.09	Other abnormal glucose	20	Y	J96.21, R65.20, J85.2, I50.33, J18.9, A41.9, I27.2, I08.1, A04.7, J44.1, J95.811, N17.9, J90, Z66, Z51.5, J98.8, I46.9, J96.22, Y84.4, R73.09
0125315	261999775	2016-01-20	2016-02-19	30	F17.210	Nicotine dependence, cigarettes, uncomplicated	21	Y	J96.21, R65.20, J85.2, I50.33, J18.9, A41.9, I27.2, I08.1, A04.7, J44.1, J95.811, N17.9, J90, Z66, Z51.5, J98.8, I46.9, J96.22, Y84.4, R73.09, F17.210
0125315	261999775	2016-01-20	2016-02-19	30	I10	Essential (primary) hypertension	22	Y	J96.21, R65.20, J85.2, I50.33, J18.9, A41.9, I27.2, I08.1, A04.7, J44.1, J95.811, N17.9, J90, Z66, Z51.5, J98.8, I46.9, J96.22, Y84.4, R73.09, F17.210, I10	Last
0127473	262301682	2016-01-31	2016-02-08	8	A41.50	Gram-negative sepsis, unspecified	1	Y	A41.50
0127473	262301682	2016-01-31	2016-02-08	8	N17.9	Acute kidney failure, unspecified	2	Y	A41.50, N17.9
0127473	262301682	2016-01-31	2016-02-08	8	E46	Unspecified protein-calorie malnutrition	3	Y	A41.50, N17.9, E46
0127473	262301682	2016-01-31	2016-02-08	8	L89.43	Pressure ulcer of contiguous site of back, buttock	4	Y	A41.50, N17.9, E46, L89.43
0127473	262301682	2016-01-31	2016-02-08	8	N39.0	Urinary tract infection, site not specified	5	Y	A41.50, N17.9, E46, L89.43, N39.0
0127473	262301682	2016-01-31	2016-02-08	8	E11.9	Type 2 diabetes mellitus without complications	6	Y	A41.50, N17.9, E46, L89.43, N39.0, E11.9
0127473	262301682	2016-01-31	2016-02-08	8	B96.20	Unspecified Escherichia coli E. coli as the cause	7	Y	A41.50, N17.9, E46, L89.43, N39.0, E11.9, B96.20
0127473	262301682	2016-01-31	2016-02-08	8	L89.314	Pressure ulcer of right buttock, stage 4	8	Y	A41.50, N17.9, E46, L89.43, N39.0, E11.9, B96.20, L89.314
0127473	262301682	2016-01-31	2016-02-08	8	J98.11	Atelectasis	9	Y	A41.50, N17.9, E46, L89.43, N39.0, E11.9, B96.20, L89.314, J98.11
0127473	262301682	2016-01-31	2016-02-08	8	R65.20	Severe sepsis without septic shock	10	Y	A41.50, N17.9, E46, L89.43, N39.0, E11.9, B96.20, L89.314, J98.11, R65.20
0127473	262301682	2016-01-31	2016-02-08	8	Z93.3	Colostomy status	11		A41.50, N17.9, E46, L89.43, N39.0, E11.9, B96.20, L89.314, J98.11, R65.20, Z93.3
0127473	262301682	2016-01-31	2016-02-08	8	E78.5	Hyperlipidemia, unspecified	12	Y	A41.50, N17.9, E46, L89.43, N39.0, E11.9, B96.20, L89.314, J98.11, R65.20, Z93.3, E78.5
0127473	262301682	2016-01-31	2016-02-08	8	L89.322	Pressure ulcer of left buttock, stage 2	13	Y	A41.50, N17.9, E46, L89.43, N39.0, E11.9, B96.20, L89.314, J98.11, R65.20, Z93.3, E78.5, L89.322
0127473	262301682	2016-01-31	2016-02-08	8	G80.8	Other cerebral palsy	14	Y	A41.50, N17.9, E46, L89.43, N39.0, E11.9, B96.20, L89.314, J98.11, R65.20, Z93.3, E78.5, L89.322, G80.8
0127473	262301682	2016-01-31	2016-02-08	8	G47.33	Obstructive sleep apnea (adult) (pediatric)	15	Y	A41.50, N17.9, E46, L89.43, N39.0, E11.9, B96.20, L89.314, J98.11, R65.20, Z93.3, E78.5, L89.322, G80.8, G47.33
0127473	262301682	2016-01-31	2016-02-08	8	N28.9	Disorder of kidney and ureter, unspecified	16	Y	A41.50, N17.9, E46, L89.43, N39.0, E11.9, B96.20, L89.314, J98.11, R65.20, Z93.3, E78.5, L89.322, G80.8, G47.33, N28.9
0127473	262301682	2016-01-31	2016-02-08	8	M62.469	Contracture of muscle, unspecified lower leg	17	Y	A41.50, N17.9, E46, L89.43, N39.0, E11.9, B96.20, L89.314, J98.11, R65.20, Z93.3, E78.5, L89.322, G80.8, G47.33, N28.9, M62.469
0127473	262301682	2016-01-31	2016-02-08	8	Z89.421	Acquired absence of other right toe(s)	18		A41.50, N17.9, E46, L89.43, N39.0, E11.9, B96.20, L89.314, J98.11, R65.20, Z93.3, E78.5, L89.322, G80.8, G47.33, N28.9, M62.469, Z89.421
0127473	262301682	2016-01-31	2016-02-08	8	E83.42	Hypomagnesemia	19	Y	A41.50, N17.9, E46, L89.43, N39.0, E11.9, B96.20, L89.314, J98.11, R65.20, Z93.3, E78.5, L89.322, G80.8, G47.33, N28.9, M62.469, Z89.421, E83.42
0127473	262301682	2016-01-31	2016-02-08	8	Z79.4	Long term (current) use of insulin	20		A41.50, N17.9, E46, L89.43, N39.0, E11.9, B96.20, L89.314, J98.11, R65.20, Z93.3, E78.5, L89.322, G80.8, G47.33, N28.9, M62.469, Z89.421, E83.42, Z79.4
0127473	262301682	2016-01-31	2016-02-08	8	B96.5	Pseudomonas (aeruginosa) (mallei) (pseudomallei) a	21	Y	A41.50, N17.9, E46, L89.43, N39.0, E11.9, B96.20, L89.314, J98.11, R65.20, Z93.3, E78.5, L89.322, G80.8, G47.33, N28.9, M62.469, Z89.421, E83.42, Z79.4, B96.5
0127473	262301682	2016-01-31	2016-02-08	8	Z22.321	Carrier or suspected carrier of Methicillin suscep	22		A41.50, N17.9, E46, L89.43, N39.0, E11.9, B96.20, L89.314, J98.11, R65.20, Z93.3, E78.5, L89.322, G80.8, G47.33, N28.9, M62.469, Z89.421, E83.42, Z79.4, B96.5, Z22.321
0127473	262301682	2016-01-31	2016-02-08	8	D50.9	Iron deficiency anemia, unspecified	23	Y	A41.50, N17.9, E46, L89.43, N39.0, E11.9, B96.20, L89.314, J98.11, R65.20, Z93.3, E78.5, L89.322, G80.8, G47.33, N28.9, M62.469, Z89.421, E83.42, Z79.4, B96.5, Z22.321, D50.9
0127473	262301682	2016-01-31	2016-02-08	8	S80.211A	Abrasion, right knee, initial encounter	24	Y	A41.50, N17.9, E46, L89.43, N39.0, E11.9, B96.20, L89.314, J98.11, R65.20, Z93.3, E78.5, L89.322, G80.8, G47.33, N28.9, M62.469, Z89.421, E83.42, Z79.4, B96.5, Z22.321, D50.9, S80.211A
0127473	262301682	2016-01-31	2016-02-08	8	Z68.29	Body mass index (BMI) 29.0-29.9, adult	25		A41.50, N17.9, E46, L89.43, N39.0, E11.9, B96.20, L89.314, J98.11, R65.20, Z93.3, E78.5, L89.322, G80.8, G47.33, N28.9, M62.469, Z89.421, E83.42, Z79.4, B96.5, Z22.321, D50.9, S80.211A, Z68.29	Last
0128681	261523872	2016-01-04	2016-01-11	7	I50.43	Acute on chronic combined systolic (congestive) an	1	Y	I50.43
0128681	261523872	2016-01-04	2016-01-11	7	J96.02	Acute respiratory failure with hypercapnia	2	Y	I50.43, J96.02
0128681	261523872	2016-01-04	2016-01-11	7	K25.4	Chronic or unspecified gastric ulcer with hemorrha	3	Y	I50.43, J96.02, K25.4
0128681	261523872	2016-01-04	2016-01-11	7	K26.4	Chronic or unspecified duodenal ulcer with hemorrh	4	Y	I50.43, J96.02, K25.4, K26.4
0128681	261523872	2016-01-04	2016-01-11	7	J96.01	Acute respiratory failure with hypoxia	5	Y	I50.43, J96.02, K25.4, K26.4, J96.01
0128681	261523872	2016-01-04	2016-01-11	7	Z68.42	Body mass index (BMI) 45.0-49.9, adult	6		I50.43, J96.02, K25.4, K26.4, J96.01, Z68.42
0128681	261523872	2016-01-04	2016-01-11	7	G47.33	Obstructive sleep apnea (adult) (pediatric)	7	Y	I50.43, J96.02, K25.4, K26.4, J96.01, Z68.42, G47.33
0128681	261523872	2016-01-04	2016-01-11	7	E78.5	Hyperlipidemia, unspecified	8	Y	I50.43, J96.02, K25.4, K26.4, J96.01, Z68.42, G47.33, E78.5
0128681	261523872	2016-01-04	2016-01-11	7	E66.9	Obesity, unspecified	9	Y	I50.43, J96.02, K25.4, K26.4, J96.01, Z68.42, G47.33, E78.5, E66.9
0128681	261523872	2016-01-04	2016-01-11	7	E03.9	Hypothyroidism, unspecified	10	Y	I50.43, J96.02, K25.4, K26.4, J96.01, Z68.42, G47.33, E78.5, E66.9, E03.9
0128681	261523872	2016-01-04	2016-01-11	7	F17.210	Nicotine dependence, cigarettes, uncomplicated	11	Y	I50.43, J96.02, K25.4, K26.4, J96.01, Z68.42, G47.33, E78.5, E66.9, E03.9, F17.210
0128681	261523872	2016-01-04	2016-01-11	7	I48.0	Paroxysmal atrial fibrillation	12	Y	I50.43, J96.02, K25.4, K26.4, J96.01, Z68.42, G47.33, E78.5, E66.9, E03.9, F17.210, I48.0
0128681	261523872	2016-01-04	2016-01-11	7	E11.9	Type 2 diabetes mellitus without complications	13	Y	I50.43, J96.02, K25.4, K26.4, J96.01, Z68.42, G47.33, E78.5, E66.9, E03.9, F17.210, I48.0, E11.9
0128681	261523872	2016-01-04	2016-01-11	7	I25.10	Atherosclerotic heart disease of native coronary a	14	Y	I50.43, J96.02, K25.4, K26.4, J96.01, Z68.42, G47.33, E78.5, E66.9, E03.9, F17.210, I48.0, E11.9, I25.10
0128681	261523872	2016-01-04	2016-01-11	7	K20.9	Esophagitis, unspecified	15	Y	I50.43, J96.02, K25.4, K26.4, J96.01, Z68.42, G47.33, E78.5, E66.9, E03.9, F17.210, I48.0, E11.9, I25.10, K20.9
0128681	261523872	2016-01-04	2016-01-11	7	J44.9	Chronic obstructive pulmonary disease, unspecified	16	Y	I50.43, J96.02, K25.4, K26.4, J96.01, Z68.42, G47.33, E78.5, E66.9, E03.9, F17.210, I48.0, E11.9, I25.10, K20.9, J44.9
0128681	261523872	2016-01-04	2016-01-11	7	I25.5	Ischemic cardiomyopathy	17	Y	I50.43, J96.02, K25.4, K26.4, J96.01, Z68.42, G47.33, E78.5, E66.9, E03.9, F17.210, I48.0, E11.9, I25.10, K20.9, J44.9, I25.5
0128681	261523872	2016-01-04	2016-01-11	7	T45.515A	Adverse effect of anticoagulants, initial encounte	18	Y	I50.43, J96.02, K25.4, K26.4, J96.01, Z68.42, G47.33, E78.5, E66.9, E03.9, F17.210, I48.0, E11.9, I25.10, K20.9, J44.9, I25.5, T45.515A
0128681	261523872	2016-01-04	2016-01-11	7	I10	Essential (primary) hypertension	19	Y	I50.43, J96.02, K25.4, K26.4, J96.01, Z68.42, G47.33, E78.5, E66.9, E03.9, F17.210, I48.0, E11.9, I25.10, K20.9, J44.9, I25.5, T45.515A, I10
0128681	261523872	2016-01-04	2016-01-11	7	Z99.81	Dependence on supplemental oxygen	20		I50.43, J96.02, K25.4, K26.4, J96.01, Z68.42, G47.33, E78.5, E66.9, E03.9, F17.210, I48.0, E11.9, I25.10, K20.9, J44.9, I25.5, T45.515A, I10, Z99.81	Last
0130093	260131081	2015-11-11	2015-11-13	2	J96.00	Acute respiratory failure, unspecified whether wit	1	Y	J96.00
0130093	260131081	2015-11-11	2015-11-13	2	I50.23	Acute on chronic systolic (congestive) heart failu	2	Y	J96.00, I50.23
0130093	260131081	2015-11-11	2015-11-13	2	I48.91	Unspecified atrial fibrillation	3	Y	J96.00, I50.23, I48.91
0130093	260131081	2015-11-11	2015-11-13	2	R63.0	Anorexia	4	Y	J96.00, I50.23, I48.91, R63.0
0130093	260131081	2015-11-11	2015-11-13	2	E83.42	Hypomagnesemia	5	Y	J96.00, I50.23, I48.91, R63.0, E83.42
0130093	260131081	2015-11-11	2015-11-13	2	E11.9	Type 2 diabetes mellitus without complications	6	Y	J96.00, I50.23, I48.91, R63.0, E83.42, E11.9
0130093	260131081	2015-11-11	2015-11-13	2	D64.9	Anemia, unspecified	7	Y	J96.00, I50.23, I48.91, R63.0, E83.42, E11.9, D64.9
0130093	260131081	2015-11-11	2015-11-13	2	I10	Essential (primary) hypertension	8	Y	J96.00, I50.23, I48.91, R63.0, E83.42, E11.9, D64.9, I10
0130093	260131081	2015-11-11	2015-11-13	2	I25.10	Atherosclerotic heart disease of native coronary a	9	Y	J96.00, I50.23, I48.91, R63.0, E83.42, E11.9, D64.9, I10, I25.10
0130093	260131081	2015-11-11	2015-11-13	2	Z95.1	Presence of aortocoronary bypass graft	10		J96.00, I50.23, I48.91, R63.0, E83.42, E11.9, D64.9, I10, I25.10, Z95.1
0130093	260131081	2015-11-11	2015-11-13	2	Z96.651	Presence of right artificial knee joint	11	Y	J96.00, I50.23, I48.91, R63.0, E83.42, E11.9, D64.9, I10, I25.10, Z95.1, Z96.651
0130093	260131081	2015-11-11	2015-11-13	2	Z96.649	Presence of unspecified artificial hip joint	12	Y	J96.00, I50.23, I48.91, R63.0, E83.42, E11.9, D64.9, I10, I25.10, Z95.1, Z96.651, Z96.649
0130093	260131081	2015-11-11	2015-11-13	2	Z87.891	Personal history of nicotine dependence	13		J96.00, I50.23, I48.91, R63.0, E83.42, E11.9, D64.9, I10, I25.10, Z95.1, Z96.651, Z96.649, Z87.891
0130093	260131081	2015-11-11	2015-11-13	2	Z79.899	Other long term (current) drug therapy	14		J96.00, I50.23, I48.91, R63.0, E83.42, E11.9, D64.9, I10, I25.10, Z95.1, Z96.651, Z96.649, Z87.891, Z79.899
0130093	260131081	2015-11-11	2015-11-13	2	I35.0	Nonrheumatic aortic (valve) stenosis	15	Y	J96.00, I50.23, I48.91, R63.0, E83.42, E11.9, D64.9, I10, I25.10, Z95.1, Z96.651, Z96.649, Z87.891, Z79.899, I35.0
0130093	260131081	2015-11-11	2015-11-13	2	R39.11	Hesitancy of micturition	16	Y	J96.00, I50.23, I48.91, R63.0, E83.42, E11.9, D64.9, I10, I25.10, Z95.1, Z96.651, Z96.649, Z87.891, Z79.899, I35.0, R39.11
0130093	260131081	2015-11-11	2015-11-13	2	T50.1X5A	Adverse effect of loop high-ceiling diuretics, ini	17	Y	J96.00, I50.23, I48.91, R63.0, E83.42, E11.9, D64.9, I10, I25.10, Z95.1, Z96.651, Z96.649, Z87.891, Z79.899, I35.0, R39.11, T50.1X5A
0130093	260131081	2015-11-11	2015-11-13	2	E87.6	Hypokalemia	18	Y	J96.00, I50.23, I48.91, R63.0, E83.42, E11.9, D64.9, I10, I25.10, Z95.1, Z96.651, Z96.649, Z87.891, Z79.899, I35.0, R39.11, T50.1X5A, E87.6
0130093	260131081	2015-11-11	2015-11-13	2	R63.5	Abnormal weight gain	19	Y	J96.00, I50.23, I48.91, R63.0, E83.42, E11.9, D64.9, I10, I25.10, Z95.1, Z96.651, Z96.649, Z87.891, Z79.899, I35.0, R39.11, T50.1X5A, E87.6, R63.5	Last
0134547	262856818	2016-02-18	2016-02-23	5	G56.12	Other lesions of median nerve, left upper limb	1	Y	G56.12
0134547	262856818	2016-02-18	2016-02-23	5	I69.354	Hemiplegia and hemiparesis following cerebral infa	2		G56.12, I69.354
0134547	262856818	2016-02-18	2016-02-23	5	M79.81	Nontraumatic hematoma of soft tissue	3	Y	G56.12, I69.354, M79.81
0134547	262856818	2016-02-18	2016-02-23	5	E78.5	Hyperlipidemia, unspecified	4	Y	G56.12, I69.354, M79.81, E78.5
0134547	262856818	2016-02-18	2016-02-23	5	I10	Essential (primary) hypertension	5	Y	G56.12, I69.354, M79.81, E78.5, I10
0134547	262856818	2016-02-18	2016-02-23	5	Z96.612	Presence of left artificial shoulder joint	6	Y	G56.12, I69.354, M79.81, E78.5, I10, Z96.612
0134547	262856818	2016-02-18	2016-02-23	5	E88.89	Other specified metabolic disorders	7	Y	G56.12, I69.354, M79.81, E78.5, I10, Z96.612, E88.89
0134547	262856818	2016-02-18	2016-02-23	5	K21.9	Gastro-esophageal reflux disease without esophagit	8	Y	G56.12, I69.354, M79.81, E78.5, I10, Z96.612, E88.89, K21.9
0134547	262856818	2016-02-18	2016-02-23	5	D50.9	Iron deficiency anemia, unspecified	9	Y	G56.12, I69.354, M79.81, E78.5, I10, Z96.612, E88.89, K21.9, D50.9
0134547	262856818	2016-02-18	2016-02-23	5	K57.90	Diverticulosis of intestine, part unspecified, wit	10	Y	G56.12, I69.354, M79.81, E78.5, I10, Z96.612, E88.89, K21.9, D50.9, K57.90
0134547	262856818	2016-02-18	2016-02-23	5	M89.9	Disorder of bone, unspecified	11	Y	G56.12, I69.354, M79.81, E78.5, I10, Z96.612, E88.89, K21.9, D50.9, K57.90, M89.9
0134547	262856818	2016-02-18	2016-02-23	5	E87.6	Hypokalemia	12	N	G56.12, I69.354, M79.81, E78.5, I10, Z96.612, E88.89, K21.9, D50.9, K57.90, M89.9, E87.6
0134547	262856818	2016-02-18	2016-02-23	5	Z88.2	Allergy status to sulfonamides status	13		G56.12, I69.354, M79.81, E78.5, I10, Z96.612, E88.89, K21.9, D50.9, K57.90, M89.9, E87.6, Z88.2
0134547	262856818	2016-02-18	2016-02-23	5	Z88.8	Allergy status to other drugs, medicaments and bio	14		G56.12, I69.354, M79.81, E78.5, I10, Z96.612, E88.89, K21.9, D50.9, K57.90, M89.9, E87.6, Z88.2, Z88.8
0134547	262856818	2016-02-18	2016-02-23	5	Z91.041	Radiographic dye allergy status	15		G56.12, I69.354, M79.81, E78.5, I10, Z96.612, E88.89, K21.9, D50.9, K57.90, M89.9, E87.6, Z88.2, Z88.8, Z91.041
0134547	262856818	2016-02-18	2016-02-23	5	Z79.01	Long term (current) use of anticoagulants	16		G56.12, I69.354, M79.81, E78.5, I10, Z96.612, E88.89, K21.9, D50.9, K57.90, M89.9, E87.6, Z88.2, Z88.8, Z91.041, Z79.01
0134547	262856818	2016-02-18	2016-02-23	5	Z86.711	Personal history of pulmonary embolism	17		G56.12, I69.354, M79.81, E78.5, I10, Z96.612, E88.89, K21.9, D50.9, K57.90, M89.9, E87.6, Z88.2, Z88.8, Z91.041, Z79.01, Z86.711
0134547	262856818	2016-02-18	2016-02-23	5	Z86.718	Personal history of other venous thrombosis and em	18		G56.12, I69.354, M79.81, E78.5, I10, Z96.612, E88.89, K21.9, D50.9, K57.90, M89.9, E87.6, Z88.2, Z88.8, Z91.041, Z79.01, Z86.711, Z86.718	Last
0137165	259399061	2015-10-16	2015-10-21	5	T85.79XA	Infection and inflammatory reaction due to other i	1	Y	T85.79XA
0137165	259399061	2015-10-16	2015-10-21	5	R65.20	Severe sepsis without septic shock	2	Y	T85.79XA, R65.20
0137165	259399061	2015-10-16	2015-10-21	5	N17.9	Acute kidney failure, unspecified	3	Y	T85.79XA, R65.20, N17.9
0137165	259399061	2015-10-16	2015-10-21	5	C25.9	Malignant neoplasm of pancreas, unspecified	4	Y	T85.79XA, R65.20, N17.9, C25.9
0137165	259399061	2015-10-16	2015-10-21	5	A41.9	Sepsis, unspecified organism	5	Y	T85.79XA, R65.20, N17.9, C25.9, A41.9
0137165	259399061	2015-10-16	2015-10-21	5	K83.1	Obstruction of bile duct	6	Y	T85.79XA, R65.20, N17.9, C25.9, A41.9, K83.1
0137165	259399061	2015-10-16	2015-10-21	5	K83.0	Cholangitis	7	Y	T85.79XA, R65.20, N17.9, C25.9, A41.9, K83.1, K83.0
0137165	259399061	2015-10-16	2015-10-21	5	I42.9	Cardiomyopathy, unspecified	8	Y	T85.79XA, R65.20, N17.9, C25.9, A41.9, K83.1, K83.0, I42.9
0137165	259399061	2015-10-16	2015-10-21	5	B96.20	Unspecified Escherichia coli E. coli as the cause	9	Y	T85.79XA, R65.20, N17.9, C25.9, A41.9, K83.1, K83.0, I42.9, B96.20
0137165	259399061	2015-10-16	2015-10-21	5	E11.40	Type 2 diabetes mellitus with diabetic neuropathy,	10	Y	T85.79XA, R65.20, N17.9, C25.9, A41.9, K83.1, K83.0, I42.9, B96.20, E11.40
0137165	259399061	2015-10-16	2015-10-21	5	Z51.5	Encounter for palliative care	11		T85.79XA, R65.20, N17.9, C25.9, A41.9, K83.1, K83.0, I42.9, B96.20, E11.40, Z51.5
0137165	259399061	2015-10-16	2015-10-21	5	Z90.5	Acquired absence of kidney	12	Y	T85.79XA, R65.20, N17.9, C25.9, A41.9, K83.1, K83.0, I42.9, B96.20, E11.40, Z51.5, Z90.5
0137165	259399061	2015-10-16	2015-10-21	5	E78.5	Hyperlipidemia, unspecified	13	Y	T85.79XA, R65.20, N17.9, C25.9, A41.9, K83.1, K83.0, I42.9, B96.20, E11.40, Z51.5, Z90.5, E78.5
0137165	259399061	2015-10-16	2015-10-21	5	K21.9	Gastro-esophageal reflux disease without esophagit	14	Y	T85.79XA, R65.20, N17.9, C25.9, A41.9, K83.1, K83.0, I42.9, B96.20, E11.40, Z51.5, Z90.5, E78.5, K21.9
0137165	259399061	2015-10-16	2015-10-21	5	G47.30	Sleep apnea, unspecified	15	Y	T85.79XA, R65.20, N17.9, C25.9, A41.9, K83.1, K83.0, I42.9, B96.20, E11.40, Z51.5, Z90.5, E78.5, K21.9, G47.30
0137165	259399061	2015-10-16	2015-10-21	5	I12.9	Hypertensive chronic kidney disease with stage 1 t	16	Y	T85.79XA, R65.20, N17.9, C25.9, A41.9, K83.1, K83.0, I42.9, B96.20, E11.40, Z51.5, Z90.5, E78.5, K21.9, G47.30, I12.9
0137165	259399061	2015-10-16	2015-10-21	5	N18.9	Chronic kidney disease, unspecified	17	Y	T85.79XA, R65.20, N17.9, C25.9, A41.9, K83.1, K83.0, I42.9, B96.20, E11.40, Z51.5, Z90.5, E78.5, K21.9, G47.30, I12.9, N18.9
0137165	259399061	2015-10-16	2015-10-21	5	Y83.8	Other surgical procedures as the cause of abnormal	18	Y	T85.79XA, R65.20, N17.9, C25.9, A41.9, K83.1, K83.0, I42.9, B96.20, E11.40, Z51.5, Z90.5, E78.5, K21.9, G47.30, I12.9, N18.9, Y83.8
0137165	259399061	2015-10-16	2015-10-21	5	Z85.51	Personal history of malignant neoplasm of bladder	19		T85.79XA, R65.20, N17.9, C25.9, A41.9, K83.1, K83.0, I42.9, B96.20, E11.40, Z51.5, Z90.5, E78.5, K21.9, G47.30, I12.9, N18.9, Y83.8, Z85.51
0137165	259399061	2015-10-16	2015-10-21	5	Z85.528	Personal history of other malignant neoplasm of ki	20		T85.79XA, R65.20, N17.9, C25.9, A41.9, K83.1, K83.0, I42.9, B96.20, E11.40, Z51.5, Z90.5, E78.5, K21.9, G47.30, I12.9, N18.9, Y83.8, Z85.51, Z85.528
0137165	259399061	2015-10-16	2015-10-21	5	Z88.8	Allergy status to other drugs, medicaments and bio	21		T85.79XA, R65.20, N17.9, C25.9, A41.9, K83.1, K83.0, I42.9, B96.20, E11.40, Z51.5, Z90.5, E78.5, K21.9, G47.30, I12.9, N18.9, Y83.8, Z85.51, Z85.528, Z88.8
0137165	259399061	2015-10-16	2015-10-21	5	Z79.82	Long term (current) use of aspirin	22		T85.79XA, R65.20, N17.9, C25.9, A41.9, K83.1, K83.0, I42.9, B96.20, E11.40, Z51.5, Z90.5, E78.5, K21.9, G47.30, I12.9, N18.9, Y83.8, Z85.51, Z85.528, Z88.8, Z79.82
0137165	259399061	2015-10-16	2015-10-21	5	Z87.891	Personal history of nicotine dependence	23		T85.79XA, R65.20, N17.9, C25.9, A41.9, K83.1, K83.0, I42.9, B96.20, E11.40, Z51.5, Z90.5, E78.5, K21.9, G47.30, I12.9, N18.9, Y83.8, Z85.51, Z85.528, Z88.8, Z79.82, Z87.891
0137165	259399061	2015-10-16	2015-10-21	5	Z95.810	Presence of automatic (implantable) cardiac defibr	24		T85.79XA, R65.20, N17.9, C25.9, A41.9, K83.1, K83.0, I42.9, B96.20, E11.40, Z51.5, Z90.5, E78.5, K21.9, G47.30, I12.9, N18.9, Y83.8, Z85.51, Z85.528, Z88.8, Z79.82, Z87.891, Z95.810
0137165	259399061	2015-10-16	2015-10-21	5	Z79.4	Long term (current) use of insulin	25		T85.79XA, R65.20, N17.9, C25.9, A41.9, K83.1, K83.0, I42.9, B96.20, E11.40, Z51.5, Z90.5, E78.5, K21.9, G47.30, I12.9, N18.9, Y83.8, Z85.51, Z85.528, Z88.8, Z79.82, Z87.891, Z95.810, Z79.4
0137165	259399061	2015-10-16	2015-10-21	5	Y92.9	Unspecified place or not applicable	26		T85.79XA, R65.20, N17.9, C25.9, A41.9, K83.1, K83.0, I42.9, B96.20, E11.40, Z51.5, Z90.5, E78.5, K21.9, G47.30, I12.9, N18.9, Y83.8, Z85.51, Z85.528, Z88.8, Z79.82, Z87.891, Z95.810, Z79.4, Y92.9	Last
0138083	160161048	2015-12-24	2015-12-25	1	R55	Syncope and collapse	1	Y	R55
0138083	160161048	2015-12-24	2015-12-25	1	N18.3	Chronic kidney disease, stage 3 (moderate)	2	Y	R55, N18.3
0138083	160161048	2015-12-24	2015-12-25	1	I48.2	Chronic atrial fibrillation	3	Y	R55, N18.3, I48.2
0138083	160161048	2015-12-24	2015-12-25	1	S01.81XA	Laceration without foreign body of other part of h	4	Y	R55, N18.3, I48.2, S01.81XA
0138083	160161048	2015-12-24	2015-12-25	1	D53.9	Nutritional anemia, unspecified	5	Y	R55, N18.3, I48.2, S01.81XA, D53.9
0138083	160161048	2015-12-24	2015-12-25	1	F10.20	Alcohol dependence, uncomplicated	6	Y	R55, N18.3, I48.2, S01.81XA, D53.9, F10.20
0138083	160161048	2015-12-24	2015-12-25	1	Y90.0	Blood alcohol level of less than 20 mg/100 ml	7	Y	R55, N18.3, I48.2, S01.81XA, D53.9, F10.20, Y90.0
0138083	160161048	2015-12-24	2015-12-25	1	I44.7	Left bundle-branch block, unspecified	8	Y	R55, N18.3, I48.2, S01.81XA, D53.9, F10.20, Y90.0, I44.7
0138083	160161048	2015-12-24	2015-12-25	1	W19.XXXA	Unspecified fall, initial encounter	9	Y	R55, N18.3, I48.2, S01.81XA, D53.9, F10.20, Y90.0, I44.7, W19.XXXA
0138083	160161048	2015-12-24	2015-12-25	1	I12.9	Hypertensive chronic kidney disease with stage 1 t	10	Y	R55, N18.3, I48.2, S01.81XA, D53.9, F10.20, Y90.0, I44.7, W19.XXXA, I12.9
0138083	160161048	2015-12-24	2015-12-25	1	I25.10	Atherosclerotic heart disease of native coronary a	11	Y	R55, N18.3, I48.2, S01.81XA, D53.9, F10.20, Y90.0, I44.7, W19.XXXA, I12.9, I25.10
0138083	160161048	2015-12-24	2015-12-25	1	I51.7	Cardiomegaly	12	Y	R55, N18.3, I48.2, S01.81XA, D53.9, F10.20, Y90.0, I44.7, W19.XXXA, I12.9, I25.10, I51.7
0138083	160161048	2015-12-24	2015-12-25	1	E78.5	Hyperlipidemia, unspecified	13	Y	R55, N18.3, I48.2, S01.81XA, D53.9, F10.20, Y90.0, I44.7, W19.XXXA, I12.9, I25.10, I51.7, E78.5
0138083	160161048	2015-12-24	2015-12-25	1	E03.9	Hypothyroidism, unspecified	14	Y	R55, N18.3, I48.2, S01.81XA, D53.9, F10.20, Y90.0, I44.7, W19.XXXA, I12.9, I25.10, I51.7, E78.5, E03.9
0138083	160161048	2015-12-24	2015-12-25	1	Z79.01	Long term (current) use of anticoagulants	15		R55, N18.3, I48.2, S01.81XA, D53.9, F10.20, Y90.0, I44.7, W19.XXXA, I12.9, I25.10, I51.7, E78.5, E03.9, Z79.01
0138083	160161048	2015-12-24	2015-12-25	1	Z95.5	Presence of coronary angioplasty implant and graft	16		R55, N18.3, I48.2, S01.81XA, D53.9, F10.20, Y90.0, I44.7, W19.XXXA, I12.9, I25.10, I51.7, E78.5, E03.9, Z79.01, Z95.5
0138083	160161048	2015-12-24	2015-12-25	1	Z86.73	Personal history of transient ischemic attack (TIA	17		R55, N18.3, I48.2, S01.81XA, D53.9, F10.20, Y90.0, I44.7, W19.XXXA, I12.9, I25.10, I51.7, E78.5, E03.9, Z79.01, Z95.5, Z86.73	Last
0139143	260140033	2015-11-11	2015-11-24	13	K83.8	Other specified diseases of biliary tract	1	Y	K83.8
0139143	260140033	2015-11-11	2015-11-24	13	J98.11	Atelectasis	2	Y	K83.8, J98.11
0139143	260140033	2015-11-11	2015-11-24	13	I50.30	Unspecified diastolic (congestive) heart failure	3	Y	K83.8, J98.11, I50.30
0139143	260140033	2015-11-11	2015-11-24	13	E88.81	Metabolic syndrome	4	Y	K83.8, J98.11, I50.30, E88.81
0139143	260140033	2015-11-11	2015-11-24	13	Z68.43	Body mass index (BMI) 50-59.9 , adult	5		K83.8, J98.11, I50.30, E88.81, Z68.43
0139143	260140033	2015-11-11	2015-11-24	13	K82.8	Other specified diseases of gallbladder	6	Y	K83.8, J98.11, I50.30, E88.81, Z68.43, K82.8
0139143	260140033	2015-11-11	2015-11-24	13	Z76.5	Malingerer conscious simulation	7		K83.8, J98.11, I50.30, E88.81, Z68.43, K82.8, Z76.5
0139143	260140033	2015-11-11	2015-11-24	13	E66.01	Morbid (severe) obesity due to excess calories	8	Y	K83.8, J98.11, I50.30, E88.81, Z68.43, K82.8, Z76.5, E66.01
0139143	260140033	2015-11-11	2015-11-24	13	E11.9	Type 2 diabetes mellitus without complications	9	Y	K83.8, J98.11, I50.30, E88.81, Z68.43, K82.8, Z76.5, E66.01, E11.9
0139143	260140033	2015-11-11	2015-11-24	13	J45.909	Unspecified asthma, uncomplicated	10	Y	K83.8, J98.11, I50.30, E88.81, Z68.43, K82.8, Z76.5, E66.01, E11.9, J45.909
0139143	260140033	2015-11-11	2015-11-24	13	I10	Essential (primary) hypertension	11	Y	K83.8, J98.11, I50.30, E88.81, Z68.43, K82.8, Z76.5, E66.01, E11.9, J45.909, I10
0139143	260140033	2015-11-11	2015-11-24	13	R31.9	Hematuria, unspecified	12	Y	K83.8, J98.11, I50.30, E88.81, Z68.43, K82.8, Z76.5, E66.01, E11.9, J45.909, I10, R31.9
0139143	260140033	2015-11-11	2015-11-24	13	F43.10	Post-traumatic stress disorder, unspecified	13	Y	K83.8, J98.11, I50.30, E88.81, Z68.43, K82.8, Z76.5, E66.01, E11.9, J45.909, I10, R31.9, F43.10
0139143	260140033	2015-11-11	2015-11-24	13	G43.909	Migraine, unspecified, not intractable, without st	14	Y	K83.8, J98.11, I50.30, E88.81, Z68.43, K82.8, Z76.5, E66.01, E11.9, J45.909, I10, R31.9, F43.10, G43.909
0139143	260140033	2015-11-11	2015-11-24	13	F32.9	Major depressive disorder, single episode, unspeci	15	Y	K83.8, J98.11, I50.30, E88.81, Z68.43, K82.8, Z76.5, E66.01, E11.9, J45.909, I10, R31.9, F43.10, G43.909, F32.9
0139143	260140033	2015-11-11	2015-11-24	13	F41.0	Panic disorder episodic paroxysmal anxiety without	16	Y	K83.8, J98.11, I50.30, E88.81, Z68.43, K82.8, Z76.5, E66.01, E11.9, J45.909, I10, R31.9, F43.10, G43.909, F32.9, F41.0
0139143	260140033	2015-11-11	2015-11-24	13	F60.9	Personality disorder, unspecified	17	Y	K83.8, J98.11, I50.30, E88.81, Z68.43, K82.8, Z76.5, E66.01, E11.9, J45.909, I10, R31.9, F43.10, G43.909, F32.9, F41.0, F60.9
0139143	260140033	2015-11-11	2015-11-24	13	Z90.49	Acquired absence of other specified parts of diges	18	Y	K83.8, J98.11, I50.30, E88.81, Z68.43, K82.8, Z76.5, E66.01, E11.9, J45.909, I10, R31.9, F43.10, G43.909, F32.9, F41.0, F60.9, Z90.49
0139143	260140033	2015-11-11	2015-11-24	13	Z86.718	Personal history of other venous thrombosis and em	19		K83.8, J98.11, I50.30, E88.81, Z68.43, K82.8, Z76.5, E66.01, E11.9, J45.909, I10, R31.9, F43.10, G43.909, F32.9, F41.0, F60.9, Z90.49, Z86.718
0139143	260140033	2015-11-11	2015-11-24	13	Z86.711	Personal history of pulmonary embolism	20		K83.8, J98.11, I50.30, E88.81, Z68.43, K82.8, Z76.5, E66.01, E11.9, J45.909, I10, R31.9, F43.10, G43.909, F32.9, F41.0, F60.9, Z90.49, Z86.718, Z86.711
0139143	260140033	2015-11-11	2015-11-24	13	Z79.01	Long term (current) use of anticoagulants	21		K83.8, J98.11, I50.30, E88.81, Z68.43, K82.8, Z76.5, E66.01, E11.9, J45.909, I10, R31.9, F43.10, G43.909, F32.9, F41.0, F60.9, Z90.49, Z86.718, Z86.711, Z79.01
0139143	260140033	2015-11-11	2015-11-24	13	Z88.2	Allergy status to sulfonamides status	22		K83.8, J98.11, I50.30, E88.81, Z68.43, K82.8, Z76.5, E66.01, E11.9, J45.909, I10, R31.9, F43.10, G43.909, F32.9, F41.0, F60.9, Z90.49, Z86.718, Z86.711, Z79.01, Z88.2
0139143	260140033	2015-11-11	2015-11-24	13	Z88.8	Allergy status to other drugs, medicaments and bio	23		K83.8, J98.11, I50.30, E88.81, Z68.43, K82.8, Z76.5, E66.01, E11.9, J45.909, I10, R31.9, F43.10, G43.909, F32.9, F41.0, F60.9, Z90.49, Z86.718, Z86.711, Z79.01, Z88.2, Z88.8
0139143	260140033	2015-11-11	2015-11-24	13	Z82.49	Family history of ischemic heart disease and other	24		K83.8, J98.11, I50.30, E88.81, Z68.43, K82.8, Z76.5, E66.01, E11.9, J45.909, I10, R31.9, F43.10, G43.909, F32.9, F41.0, F60.9, Z90.49, Z86.718, Z86.711, Z79.01, Z88.2, Z88.8, Z82.49
0139143	260140033	2015-11-11	2015-11-24	13	Z65.9	Problem related to unspecified psychosocial circum	25		K83.8, J98.11, I50.30, E88.81, Z68.43, K82.8, Z76.5, E66.01, E11.9, J45.909, I10, R31.9, F43.10, G43.909, F32.9, F41.0, F60.9, Z90.49, Z86.718, Z86.711, Z79.01, Z88.2, Z88.8, Z82.49, Z65.9	Last
0144302	259273076	2015-10-13	2015-10-26	13	J44.1	Chronic obstructive pulmonary disease with (acute)	1	Y	J44.1
0144302	259273076	2015-10-13	2015-10-26	13	N17.9	Acute kidney failure, unspecified	2	Y	J44.1, N17.9
0144302	259273076	2015-10-13	2015-10-26	13	I47.2	Ventricular tachycardia	3	N	J44.1, N17.9, I47.2
0144302	259273076	2015-10-13	2015-10-26	13	K43.3	Parastomal hernia with obstruction, without gangre	4	Y	J44.1, N17.9, I47.2, K43.3
0144302	259273076	2015-10-13	2015-10-26	13	Z99.81	Dependence on supplemental oxygen	5		J44.1, N17.9, I47.2, K43.3, Z99.81
0144302	259273076	2015-10-13	2015-10-26	13	K22.70	Barretts esophagus without dysplasia	6	Y	J44.1, N17.9, I47.2, K43.3, Z99.81, K22.70
0144302	259273076	2015-10-13	2015-10-26	13	E53.8	Deficiency of other specified B group vitamins	7	Y	J44.1, N17.9, I47.2, K43.3, Z99.81, K22.70, E53.8
0144302	259273076	2015-10-13	2015-10-26	13	J43.9	Emphysema, unspecified	8	Y	J44.1, N17.9, I47.2, K43.3, Z99.81, K22.70, E53.8, J43.9
0144302	259273076	2015-10-13	2015-10-26	13	K21.9	Gastro-esophageal reflux disease without esophagit	9	Y	J44.1, N17.9, I47.2, K43.3, Z99.81, K22.70, E53.8, J43.9, K21.9
0144302	259273076	2015-10-13	2015-10-26	13	K44.9	Diaphragmatic hernia without obstruction or gangre	10	Y	J44.1, N17.9, I47.2, K43.3, Z99.81, K22.70, E53.8, J43.9, K21.9, K44.9
0144302	259273076	2015-10-13	2015-10-26	13	D63.8	Anemia in other chronic diseases classified elsewh	11	Y	J44.1, N17.9, I47.2, K43.3, Z99.81, K22.70, E53.8, J43.9, K21.9, K44.9, D63.8
0144302	259273076	2015-10-13	2015-10-26	13	I10	Essential (primary) hypertension	12	Y	J44.1, N17.9, I47.2, K43.3, Z99.81, K22.70, E53.8, J43.9, K21.9, K44.9, D63.8, I10
0144302	259273076	2015-10-13	2015-10-26	13	F41.9	Anxiety disorder, unspecified	13	Y	J44.1, N17.9, I47.2, K43.3, Z99.81, K22.70, E53.8, J43.9, K21.9, K44.9, D63.8, I10, F41.9
0144302	259273076	2015-10-13	2015-10-26	13	I25.10	Atherosclerotic heart disease of native coronary a	14	Y	J44.1, N17.9, I47.2, K43.3, Z99.81, K22.70, E53.8, J43.9, K21.9, K44.9, D63.8, I10, F41.9, I25.10
0144302	259273076	2015-10-13	2015-10-26	13	Z93.3	Colostomy status	15		J44.1, N17.9, I47.2, K43.3, Z99.81, K22.70, E53.8, J43.9, K21.9, K44.9, D63.8, I10, F41.9, I25.10, Z93.3
0144302	259273076	2015-10-13	2015-10-26	13	K57.30	Diverticulosis of large intestine without perforat	16	Y	J44.1, N17.9, I47.2, K43.3, Z99.81, K22.70, E53.8, J43.9, K21.9, K44.9, D63.8, I10, F41.9, I25.10, Z93.3, K57.30
0144302	259273076	2015-10-13	2015-10-26	13	D72.828	Other elevated white blood cell count	17	Y	J44.1, N17.9, I47.2, K43.3, Z99.81, K22.70, E53.8, J43.9, K21.9, K44.9, D63.8, I10, F41.9, I25.10, Z93.3, K57.30, D72.828
0144302	259273076	2015-10-13	2015-10-26	13	E78.5	Hyperlipidemia, unspecified	18	Y	J44.1, N17.9, I47.2, K43.3, Z99.81, K22.70, E53.8, J43.9, K21.9, K44.9, D63.8, I10, F41.9, I25.10, Z93.3, K57.30, D72.828, E78.5
0144302	259273076	2015-10-13	2015-10-26	13	Z86.718	Personal history of other venous thrombosis and em	19		J44.1, N17.9, I47.2, K43.3, Z99.81, K22.70, E53.8, J43.9, K21.9, K44.9, D63.8, I10, F41.9, I25.10, Z93.3, K57.30, D72.828, E78.5, Z86.718
0144302	259273076	2015-10-13	2015-10-26	13	Z87.891	Personal history of nicotine dependence	20		J44.1, N17.9, I47.2, K43.3, Z99.81, K22.70, E53.8, J43.9, K21.9, K44.9, D63.8, I10, F41.9, I25.10, Z93.3, K57.30, D72.828, E78.5, Z86.718, Z87.891	Last
0145285	259256733	2015-10-13	2015-10-13	1	C22.8	Malignant neoplasm of liver, primary, unspecified	1	Y	C22.8
0145285	259256733	2015-10-13	2015-10-13	1	I85.11	Secondary esophageal varices with bleeding	2	Y	C22.8, I85.11
0145285	259256733	2015-10-13	2015-10-13	1	I95.9	Hypotension, unspecified	3	Y	C22.8, I85.11, I95.9
0145285	259256733	2015-10-13	2015-10-13	1	N17.9	Acute kidney failure, unspecified	4	Y	C22.8, I85.11, I95.9, N17.9
0145285	259256733	2015-10-13	2015-10-13	1	K76.6	Portal hypertension	5	Y	C22.8, I85.11, I95.9, N17.9, K76.6
0145285	259256733	2015-10-13	2015-10-13	1	K70.31	Alcoholic cirrhosis of liver with ascites	6	Y	C22.8, I85.11, I95.9, N17.9, K76.6, K70.31
0145285	259256733	2015-10-13	2015-10-13	1	B19.10	Unspecified viral hepatitis B without hepatic coma	7	Y	C22.8, I85.11, I95.9, N17.9, K76.6, K70.31, B19.10
0145285	259256733	2015-10-13	2015-10-13	1	J44.9	Chronic obstructive pulmonary disease, unspecified	8	Y	C22.8, I85.11, I95.9, N17.9, K76.6, K70.31, B19.10, J44.9
0145285	259256733	2015-10-13	2015-10-13	1	E11.9	Type 2 diabetes mellitus without complications	9	Y	C22.8, I85.11, I95.9, N17.9, K76.6, K70.31, B19.10, J44.9, E11.9
0145285	259256733	2015-10-13	2015-10-13	1	F10.10	Alcohol abuse, uncomplicated	10	Y	C22.8, I85.11, I95.9, N17.9, K76.6, K70.31, B19.10, J44.9, E11.9, F10.10
0145285	259256733	2015-10-13	2015-10-13	1	R00.0	Tachycardia, unspecified	11	Y	C22.8, I85.11, I95.9, N17.9, K76.6, K70.31, B19.10, J44.9, E11.9, F10.10, R00.0
0145285	259256733	2015-10-13	2015-10-13	1	R06.00	Dyspnea, unspecified	12	Y	C22.8, I85.11, I95.9, N17.9, K76.6, K70.31, B19.10, J44.9, E11.9, F10.10, R00.0, R06.00
0145285	259256733	2015-10-13	2015-10-13	1	B19.20	Unspecified viral hepatitis C without hepatic coma	13	Y	C22.8, I85.11, I95.9, N17.9, K76.6, K70.31, B19.10, J44.9, E11.9, F10.10, R00.0, R06.00, B19.20
0145285	259256733	2015-10-13	2015-10-13	1	Z88.8	Allergy status to other drugs, medicaments and bio	14		C22.8, I85.11, I95.9, N17.9, K76.6, K70.31, B19.10, J44.9, E11.9, F10.10, R00.0, R06.00, B19.20, Z88.8
0145285	259256733	2015-10-13	2015-10-13	1	Z72.0	Tobacco use	15		C22.8, I85.11, I95.9, N17.9, K76.6, K70.31, B19.10, J44.9, E11.9, F10.10, R00.0, R06.00, B19.20, Z88.8, Z72.0
0145285	259256733	2015-10-13	2015-10-13	1	Z51.5	Encounter for palliative care	16		C22.8, I85.11, I95.9, N17.9, K76.6, K70.31, B19.10, J44.9, E11.9, F10.10, R00.0, R06.00, B19.20, Z88.8, Z72.0, Z51.5
0145285	259256733	2015-10-13	2015-10-13	1	Z79.4	Long term (current) use of insulin	17		C22.8, I85.11, I95.9, N17.9, K76.6, K70.31, B19.10, J44.9, E11.9, F10.10, R00.0, R06.00, B19.20, Z88.8, Z72.0, Z51.5, Z79.4	Last
0148041	261468979	2016-01-02	2016-01-06	4	K72.90	Hepatic failure, unspecified without coma	1	Y	K72.90
0148041	261468979	2016-01-02	2016-01-06	4	K76.6	Portal hypertension	2	Y	K72.90, K76.6
0148041	261468979	2016-01-02	2016-01-06	4	I85.00	Esophageal varices without bleeding	3	Y	K72.90, K76.6, I85.00
0148041	261468979	2016-01-02	2016-01-06	4	R18.8	Other ascites	4	Y	K72.90, K76.6, I85.00, R18.8
0148041	261468979	2016-01-02	2016-01-06	4	D69.59	Other secondary thrombocytopenia	5	Y	K72.90, K76.6, I85.00, R18.8, D69.59
0148041	261468979	2016-01-02	2016-01-06	4	I48.91	Unspecified atrial fibrillation	6	Y	K72.90, K76.6, I85.00, R18.8, D69.59, I48.91
0148041	261468979	2016-01-02	2016-01-06	4	K74.60	Unspecified cirrhosis of liver	7	Y	K72.90, K76.6, I85.00, R18.8, D69.59, I48.91, K74.60
0148041	261468979	2016-01-02	2016-01-06	4	I10	Essential (primary) hypertension	8	Y	K72.90, K76.6, I85.00, R18.8, D69.59, I48.91, K74.60, I10
0148041	261468979	2016-01-02	2016-01-06	4	I25.10	Atherosclerotic heart disease of native coronary a	9	Y	K72.90, K76.6, I85.00, R18.8, D69.59, I48.91, K74.60, I10, I25.10
0148041	261468979	2016-01-02	2016-01-06	4	K52.9	Noninfective gastroenteritis and colitis, unspecif	10	Y	K72.90, K76.6, I85.00, R18.8, D69.59, I48.91, K74.60, I10, I25.10, K52.9
0148041	261468979	2016-01-02	2016-01-06	4	F32.9	Major depressive disorder, single episode, unspeci	11	Y	K72.90, K76.6, I85.00, R18.8, D69.59, I48.91, K74.60, I10, I25.10, K52.9, F32.9
0148041	261468979	2016-01-02	2016-01-06	4	K75.81	Nonalcoholic steatohepatitis (NASH)	12	Y	K72.90, K76.6, I85.00, R18.8, D69.59, I48.91, K74.60, I10, I25.10, K52.9, F32.9, K75.81
0148041	261468979	2016-01-02	2016-01-06	4	K64.5	Perianal venous thrombosis	13	Y	K72.90, K76.6, I85.00, R18.8, D69.59, I48.91, K74.60, I10, I25.10, K52.9, F32.9, K75.81, K64.5	Last
0148041	263345001	2016-03-06	2016-03-18	12	A41.9	Sepsis, unspecified organism	1	Y	A41.9
0148041	263345001	2016-03-06	2016-03-18	12	K76.7	Hepatorenal syndrome	2	Y	A41.9, K76.7
0148041	263345001	2016-03-06	2016-03-18	12	R65.21	Severe sepsis with septic shock	3	Y	A41.9, K76.7, R65.21
0148041	263345001	2016-03-06	2016-03-18	12	N17.9	Acute kidney failure, unspecified	4	Y	A41.9, K76.7, R65.21, N17.9
0148041	263345001	2016-03-06	2016-03-18	12	K65.2	Spontaneous bacterial peritonitis	5	Y	A41.9, K76.7, R65.21, N17.9, K65.2
0148041	263345001	2016-03-06	2016-03-18	12	I85.10	Secondary esophageal varices without bleeding	6	Y	A41.9, K76.7, R65.21, N17.9, K65.2, I85.10
0148041	263345001	2016-03-06	2016-03-18	12	R18.8	Other ascites	7	Y	A41.9, K76.7, R65.21, N17.9, K65.2, I85.10, R18.8
0148041	263345001	2016-03-06	2016-03-18	12	D69.6	Thrombocytopenia, unspecified	8	Y	A41.9, K76.7, R65.21, N17.9, K65.2, I85.10, R18.8, D69.6
0148041	263345001	2016-03-06	2016-03-18	12	Z68.42	Body mass index (BMI) 45.0-49.9, adult	9		A41.9, K76.7, R65.21, N17.9, K65.2, I85.10, R18.8, D69.6, Z68.42
0148041	263345001	2016-03-06	2016-03-18	12	N39.0	Urinary tract infection, site not specified	10	Y	A41.9, K76.7, R65.21, N17.9, K65.2, I85.10, R18.8, D69.6, Z68.42, N39.0
0148041	263345001	2016-03-06	2016-03-18	12	K76.6	Portal hypertension	11	Y	A41.9, K76.7, R65.21, N17.9, K65.2, I85.10, R18.8, D69.6, Z68.42, N39.0, K76.6
0148041	263345001	2016-03-06	2016-03-18	12	I48.91	Unspecified atrial fibrillation	12	Y	A41.9, K76.7, R65.21, N17.9, K65.2, I85.10, R18.8, D69.6, Z68.42, N39.0, K76.6, I48.91
0148041	263345001	2016-03-06	2016-03-18	12	K74.60	Unspecified cirrhosis of liver	13	Y	A41.9, K76.7, R65.21, N17.9, K65.2, I85.10, R18.8, D69.6, Z68.42, N39.0, K76.6, I48.91, K74.60
0148041	263345001	2016-03-06	2016-03-18	12	E78.5	Hyperlipidemia, unspecified	14	Y	A41.9, K76.7, R65.21, N17.9, K65.2, I85.10, R18.8, D69.6, Z68.42, N39.0, K76.6, I48.91, K74.60, E78.5
0148041	263345001	2016-03-06	2016-03-18	12	I25.10	Atherosclerotic heart disease of native coronary a	15	Y	A41.9, K76.7, R65.21, N17.9, K65.2, I85.10, R18.8, D69.6, Z68.42, N39.0, K76.6, I48.91, K74.60, E78.5, I25.10
0148041	263345001	2016-03-06	2016-03-18	12	F32.9	Major depressive disorder, single episode, unspeci	16	Y	A41.9, K76.7, R65.21, N17.9, K65.2, I85.10, R18.8, D69.6, Z68.42, N39.0, K76.6, I48.91, K74.60, E78.5, I25.10, F32.9
0148041	263345001	2016-03-06	2016-03-18	12	E66.01	Morbid (severe) obesity due to excess calories	17	Y	A41.9, K76.7, R65.21, N17.9, K65.2, I85.10, R18.8, D69.6, Z68.42, N39.0, K76.6, I48.91, K74.60, E78.5, I25.10, F32.9, E66.01
0148041	263345001	2016-03-06	2016-03-18	12	K75.81	Nonalcoholic steatohepatitis (NASH)	18	Y	A41.9, K76.7, R65.21, N17.9, K65.2, I85.10, R18.8, D69.6, Z68.42, N39.0, K76.6, I48.91, K74.60, E78.5, I25.10, F32.9, E66.01, K75.81
0148041	263345001	2016-03-06	2016-03-18	12	N18.9	Chronic kidney disease, unspecified	19	Y	A41.9, K76.7, R65.21, N17.9, K65.2, I85.10, R18.8, D69.6, Z68.42, N39.0, K76.6, I48.91, K74.60, E78.5, I25.10, F32.9, E66.01, K75.81, N18.9
0148041	263345001	2016-03-06	2016-03-18	12	I12.9	Hypertensive chronic kidney disease with stage 1 t	20	Y	A41.9, K76.7, R65.21, N17.9, K65.2, I85.10, R18.8, D69.6, Z68.42, N39.0, K76.6, I48.91, K74.60, E78.5, I25.10, F32.9, E66.01, K75.81, N18.9, I12.9
0148041	263345001	2016-03-06	2016-03-18	12	Z95.5	Presence of coronary angioplasty implant and graft	21		A41.9, K76.7, R65.21, N17.9, K65.2, I85.10, R18.8, D69.6, Z68.42, N39.0, K76.6, I48.91, K74.60, E78.5, I25.10, F32.9, E66.01, K75.81, N18.9, I12.9, Z95.5
0148041	263345001	2016-03-06	2016-03-18	12	E16.2	Hypoglycemia, unspecified	22	Y	A41.9, K76.7, R65.21, N17.9, K65.2, I85.10, R18.8, D69.6, Z68.42, N39.0, K76.6, I48.91, K74.60, E78.5, I25.10, F32.9, E66.01, K75.81, N18.9, I12.9, Z95.5, E16.2
0148041	263345001	2016-03-06	2016-03-18	12	B96.1	Klebsiella pneumoniae K. pneumoniae as the cause o	23	Y	A41.9, K76.7, R65.21, N17.9, K65.2, I85.10, R18.8, D69.6, Z68.42, N39.0, K76.6, I48.91, K74.60, E78.5, I25.10, F32.9, E66.01, K75.81, N18.9, I12.9, Z95.5, E16.2, B96.1
0148041	263345001	2016-03-06	2016-03-18	12	F41.9	Anxiety disorder, unspecified	24	Y	A41.9, K76.7, R65.21, N17.9, K65.2, I85.10, R18.8, D69.6, Z68.42, N39.0, K76.6, I48.91, K74.60, E78.5, I25.10, F32.9, E66.01, K75.81, N18.9, I12.9, Z95.5, E16.2, B96.1, F41.9
0148041	263345001	2016-03-06	2016-03-18	12	K72.90	Hepatic failure, unspecified without coma	25	Y	A41.9, K76.7, R65.21, N17.9, K65.2, I85.10, R18.8, D69.6, Z68.42, N39.0, K76.6, I48.91, K74.60, E78.5, I25.10, F32.9, E66.01, K75.81, N18.9, I12.9, Z95.5, E16.2, B96.1, F41.9, K72.90
0148041	263345001	2016-03-06	2016-03-18	12	F17.200	Nicotine dependence, unspecified, uncomplicated	26	Y	A41.9, K76.7, R65.21, N17.9, K65.2, I85.10, R18.8, D69.6, Z68.42, N39.0, K76.6, I48.91, K74.60, E78.5, I25.10, F32.9, E66.01, K75.81, N18.9, I12.9, Z95.5, E16.2, B96.1, F41.9, K72.90, F17.200
0148041	263345001	2016-03-06	2016-03-18	12	G89.29	Other chronic pain	27	Y	A41.9, K76.7, R65.21, N17.9, K65.2, I85.10, R18.8, D69.6, Z68.42, N39.0, K76.6, I48.91, K74.60, E78.5, I25.10, F32.9, E66.01, K75.81, N18.9, I12.9, Z95.5, E16.2, B96.1, F41.9, K72.90, F17.200, G89.29
0148041	263345001	2016-03-06	2016-03-18	12	I73.9	Peripheral vascular disease, unspecified	28	Y	A41.9, K76.7, R65.21, N17.9, K65.2, I85.10, R18.8, D69.6, Z68.42, N39.0, K76.6, I48.91, K74.60, E78.5, I25.10, F32.9, E66.01, K75.81, N18.9, I12.9, Z95.5, E16.2, B96.1, F41.9, K72.90, F17.200, G89.29, I73.9
0148041	263345001	2016-03-06	2016-03-18	12	Z79.01	Long term (current) use of anticoagulants	29		A41.9, K76.7, R65.21, N17.9, K65.2, I85.10, R18.8, D69.6, Z68.42, N39.0, K76.6, I48.91, K74.60, E78.5, I25.10, F32.9, E66.01, K75.81, N18.9, I12.9, Z95.5, E16.2, B96.1, F41.9, K72.90, F17.200, G89.29, I73.9, Z79.01
0148041	263345001	2016-03-06	2016-03-18	12	Z88.2	Allergy status to sulfonamides status	30		A41.9, K76.7, R65.21, N17.9, K65.2, I85.10, R18.8, D69.6, Z68.42, N39.0, K76.6, I48.91, K74.60, E78.5, I25.10, F32.9, E66.01, K75.81, N18.9, I12.9, Z95.5, E16.2, B96.1, F41.9, K72.90, F17.200, G89.29, I73.9, Z79.01, Z88.2	Last
0149312	262459126	2016-02-04	2016-02-18	14	A41.9	Sepsis, unspecified organism	1	Y	A41.9
0149312	262459126	2016-02-04	2016-02-18	14	J96.21	Acute and chronic respiratory failure with hypoxia	2	Y	A41.9, J96.21
0149312	262459126	2016-02-04	2016-02-18	14	R57.8	Other shock	3	N	A41.9, J96.21, R57.8
0149312	262459126	2016-02-04	2016-02-18	14	N17.0	Acute kidney failure with tubular necrosis	4	Y	A41.9, J96.21, R57.8, N17.0
0149312	262459126	2016-02-04	2016-02-18	14	R65.20	Severe sepsis without septic shock	5	Y	A41.9, J96.21, R57.8, N17.0, R65.20
0149312	262459126	2016-02-04	2016-02-18	14	J18.9	Pneumonia, unspecified organism	6	Y	A41.9, J96.21, R57.8, N17.0, R65.20, J18.9
0149312	262459126	2016-02-04	2016-02-18	14	D62	Acute posthemorrhagic anemia	7	N	A41.9, J96.21, R57.8, N17.0, R65.20, J18.9, D62
0149312	262459126	2016-02-04	2016-02-18	14	I50.32	Chronic diastolic (congestive) heart failure	8	Y	A41.9, J96.21, R57.8, N17.0, R65.20, J18.9, D62, I50.32
0149312	262459126	2016-02-04	2016-02-18	14	I25.110	Atherosclerotic heart disease of native coronary a	9	Y	A41.9, J96.21, R57.8, N17.0, R65.20, J18.9, D62, I50.32, I25.110
0149312	262459126	2016-02-04	2016-02-18	14	D69.6	Thrombocytopenia, unspecified	10	N	A41.9, J96.21, R57.8, N17.0, R65.20, J18.9, D62, I50.32, I25.110, D69.6
0149312	262459126	2016-02-04	2016-02-18	14	K26.4	Chronic or unspecified duodenal ulcer with hemorrh	11	N	A41.9, J96.21, R57.8, N17.0, R65.20, J18.9, D62, I50.32, I25.110, D69.6, K26.4
0149312	262459126	2016-02-04	2016-02-18	14	Z68.41	Body mass index (BMI) 40.0-44.9, adult	12		A41.9, J96.21, R57.8, N17.0, R65.20, J18.9, D62, I50.32, I25.110, D69.6, K26.4, Z68.41
0149312	262459126	2016-02-04	2016-02-18	14	J44.1	Chronic obstructive pulmonary disease with (acute)	13	Y	A41.9, J96.21, R57.8, N17.0, R65.20, J18.9, D62, I50.32, I25.110, D69.6, K26.4, Z68.41, J44.1
0149312	262459126	2016-02-04	2016-02-18	14	J44.0	Chronic obstructive pulmonary disease with acute l	14	Y	A41.9, J96.21, R57.8, N17.0, R65.20, J18.9, D62, I50.32, I25.110, D69.6, K26.4, Z68.41, J44.1, J44.0
0149312	262459126	2016-02-04	2016-02-18	14	K22.10	Ulcer of esophagus without bleeding	15	N	A41.9, J96.21, R57.8, N17.0, R65.20, J18.9, D62, I50.32, I25.110, D69.6, K26.4, Z68.41, J44.1, J44.0, K22.10
0149312	262459126	2016-02-04	2016-02-18	14	I82.619	Acute embolism and thrombosis of superficial veins	16	N	A41.9, J96.21, R57.8, N17.0, R65.20, J18.9, D62, I50.32, I25.110, D69.6, K26.4, Z68.41, J44.1, J44.0, K22.10, I82.619
0149312	262459126	2016-02-04	2016-02-18	14	G47.33	Obstructive sleep apnea (adult) (pediatric)	17	Y	A41.9, J96.21, R57.8, N17.0, R65.20, J18.9, D62, I50.32, I25.110, D69.6, K26.4, Z68.41, J44.1, J44.0, K22.10, I82.619, G47.33
0149312	262459126	2016-02-04	2016-02-18	14	I20.9	Angina pectoris, unspecified	18	N	A41.9, J96.21, R57.8, N17.0, R65.20, J18.9, D62, I50.32, I25.110, D69.6, K26.4, Z68.41, J44.1, J44.0, K22.10, I82.619, G47.33, I20.9
0149312	262459126	2016-02-04	2016-02-18	14	E87.5	Hyperkalemia	19	N	A41.9, J96.21, R57.8, N17.0, R65.20, J18.9, D62, I50.32, I25.110, D69.6, K26.4, Z68.41, J44.1, J44.0, K22.10, I82.619, G47.33, I20.9, E87.5
0149312	262459126	2016-02-04	2016-02-18	14	Z91.19	Patients noncompliance with other medical treatmen	20	Y	A41.9, J96.21, R57.8, N17.0, R65.20, J18.9, D62, I50.32, I25.110, D69.6, K26.4, Z68.41, J44.1, J44.0, K22.10, I82.619, G47.33, I20.9, E87.5, Z91.19
0149312	262459126	2016-02-04	2016-02-18	14	Z99.81	Dependence on supplemental oxygen	21		A41.9, J96.21, R57.8, N17.0, R65.20, J18.9, D62, I50.32, I25.110, D69.6, K26.4, Z68.41, J44.1, J44.0, K22.10, I82.619, G47.33, I20.9, E87.5, Z91.19, Z99.81
0149312	262459126	2016-02-04	2016-02-18	14	E66.01	Morbid (severe) obesity due to excess calories	22	Y	A41.9, J96.21, R57.8, N17.0, R65.20, J18.9, D62, I50.32, I25.110, D69.6, K26.4, Z68.41, J44.1, J44.0, K22.10, I82.619, G47.33, I20.9, E87.5, Z91.19, Z99.81, E66.01
0149312	262459126	2016-02-04	2016-02-18	14	I48.91	Unspecified atrial fibrillation	23	Y	A41.9, J96.21, R57.8, N17.0, R65.20, J18.9, D62, I50.32, I25.110, D69.6, K26.4, Z68.41, J44.1, J44.0, K22.10, I82.619, G47.33, I20.9, E87.5, Z91.19, Z99.81, E66.01, I48.91
0149312	262459126	2016-02-04	2016-02-18	14	I71.4	Abdominal aortic aneurysm, without rupture	24	Y	A41.9, J96.21, R57.8, N17.0, R65.20, J18.9, D62, I50.32, I25.110, D69.6, K26.4, Z68.41, J44.1, J44.0, K22.10, I82.619, G47.33, I20.9, E87.5, Z91.19, Z99.81, E66.01, I48.91, I71.4
0149312	262459126	2016-02-04	2016-02-18	14	Z72.0	Tobacco use	25		A41.9, J96.21, R57.8, N17.0, R65.20, J18.9, D62, I50.32, I25.110, D69.6, K26.4, Z68.41, J44.1, J44.0, K22.10, I82.619, G47.33, I20.9, E87.5, Z91.19, Z99.81, E66.01, I48.91, I71.4, Z72.0	Last
0151354	262908189	2016-02-20	2016-02-25	5	C17.0	Malignant neoplasm of duodenum	1	Y	C17.0
0151354	262908189	2016-02-20	2016-02-25	5	K83.0	Cholangitis	2	Y	C17.0, K83.0
0151354	262908189	2016-02-20	2016-02-25	5	C78.7	Secondary malignant neoplasm of liver and intrahep	3	Y	C17.0, K83.0, C78.7
0151354	262908189	2016-02-20	2016-02-25	5	K83.1	Obstruction of bile duct	4	Y	C17.0, K83.0, C78.7, K83.1
0151354	262908189	2016-02-20	2016-02-25	5	R64	Cachexia	5	Y	C17.0, K83.0, C78.7, K83.1, R64
0151354	262908189	2016-02-20	2016-02-25	5	C78.89	Secondary malignant neoplasm of other digestive or	6	Y	C17.0, K83.0, C78.7, K83.1, R64, C78.89
0151354	262908189	2016-02-20	2016-02-25	5	I48.91	Unspecified atrial fibrillation	7	Y	C17.0, K83.0, C78.7, K83.1, R64, C78.89, I48.91
0151354	262908189	2016-02-20	2016-02-25	5	E11.9	Type 2 diabetes mellitus without complications	8	Y	C17.0, K83.0, C78.7, K83.1, R64, C78.89, I48.91, E11.9
0151354	262908189	2016-02-20	2016-02-25	5	Z68.1	Body mass index (BMI) 19 or less, adult	9		C17.0, K83.0, C78.7, K83.1, R64, C78.89, I48.91, E11.9, Z68.1
0151354	262908189	2016-02-20	2016-02-25	5	R59.0	Localized enlarged lymph nodes	10	Y	C17.0, K83.0, C78.7, K83.1, R64, C78.89, I48.91, E11.9, Z68.1, R59.0
0151354	262908189	2016-02-20	2016-02-25	5	I10	Essential (primary) hypertension	11	Y	C17.0, K83.0, C78.7, K83.1, R64, C78.89, I48.91, E11.9, Z68.1, R59.0, I10
0151354	262908189	2016-02-20	2016-02-25	5	E87.6	Hypokalemia	12	N	C17.0, K83.0, C78.7, K83.1, R64, C78.89, I48.91, E11.9, Z68.1, R59.0, I10, E87.6
0151354	262908189	2016-02-20	2016-02-25	5	K21.0	Gastro-esophageal reflux disease with esophagitis	13	Y	C17.0, K83.0, C78.7, K83.1, R64, C78.89, I48.91, E11.9, Z68.1, R59.0, I10, E87.6, K21.0
0151354	262908189	2016-02-20	2016-02-25	5	R45.1	Restlessness and agitation	14	N	C17.0, K83.0, C78.7, K83.1, R64, C78.89, I48.91, E11.9, Z68.1, R59.0, I10, E87.6, K21.0, R45.1
0151354	262908189	2016-02-20	2016-02-25	5	K59.00	Constipation, unspecified	15	Y	C17.0, K83.0, C78.7, K83.1, R64, C78.89, I48.91, E11.9, Z68.1, R59.0, I10, E87.6, K21.0, R45.1, K59.00
0151354	262908189	2016-02-20	2016-02-25	5	Z86.73	Personal history of transient ischemic attack (TIA	16		C17.0, K83.0, C78.7, K83.1, R64, C78.89, I48.91, E11.9, Z68.1, R59.0, I10, E87.6, K21.0, R45.1, K59.00, Z86.73
0151354	262908189	2016-02-20	2016-02-25	5	F10.21	Alcohol dependence, in remission	17	Y	C17.0, K83.0, C78.7, K83.1, R64, C78.89, I48.91, E11.9, Z68.1, R59.0, I10, E87.6, K21.0, R45.1, K59.00, Z86.73, F10.21
0151354	262908189	2016-02-20	2016-02-25	5	E78.5	Hyperlipidemia, unspecified	18	Y	C17.0, K83.0, C78.7, K83.1, R64, C78.89, I48.91, E11.9, Z68.1, R59.0, I10, E87.6, K21.0, R45.1, K59.00, Z86.73, F10.21, E78.5	Last
0155975	259256634	2015-10-13	2015-10-17	4	I21.4	Non-ST elevation (NSTEMI) myocardial infarction	1	Y	I21.4
0155975	259256634	2015-10-13	2015-10-17	4	I60.8	Other nontraumatic subarachnoid hemorrhage	2	Y	I21.4, I60.8
0155975	259256634	2015-10-13	2015-10-17	4	R47.01	Aphasia	3	Y	I21.4, I60.8, R47.01
0155975	259256634	2015-10-13	2015-10-17	4	G81.94	Hemiplegia, unspecified affecting left nondominant	4	Y	I21.4, I60.8, R47.01, G81.94
0155975	259256634	2015-10-13	2015-10-17	4	Q21.1	Atrial septal defect	5		I21.4, I60.8, R47.01, G81.94, Q21.1
0155975	259256634	2015-10-13	2015-10-17	4	R56.9	Unspecified convulsions	6	Y	I21.4, I60.8, R47.01, G81.94, Q21.1, R56.9
0155975	259256634	2015-10-13	2015-10-17	4	Z87.891	Personal history of nicotine dependence	7		I21.4, I60.8, R47.01, G81.94, Q21.1, R56.9, Z87.891
0155975	259256634	2015-10-13	2015-10-17	4	E11.9	Type 2 diabetes mellitus without complications	8	Y	I21.4, I60.8, R47.01, G81.94, Q21.1, R56.9, Z87.891, E11.9
0155975	259256634	2015-10-13	2015-10-17	4	E78.5	Hyperlipidemia, unspecified	9	Y	I21.4, I60.8, R47.01, G81.94, Q21.1, R56.9, Z87.891, E11.9, E78.5
0155975	259256634	2015-10-13	2015-10-17	4	Z95.2	Presence of prosthetic heart valve	10		I21.4, I60.8, R47.01, G81.94, Q21.1, R56.9, Z87.891, E11.9, E78.5, Z95.2
0155975	259256634	2015-10-13	2015-10-17	4	Z79.82	Long term (current) use of aspirin	11		I21.4, I60.8, R47.01, G81.94, Q21.1, R56.9, Z87.891, E11.9, E78.5, Z95.2, Z79.82
0155975	259256634	2015-10-13	2015-10-17	4	I69.398	Other sequelae of cerebral infarction	12		I21.4, I60.8, R47.01, G81.94, Q21.1, R56.9, Z87.891, E11.9, E78.5, Z95.2, Z79.82, I69.398	Last
0156601	260491758	2015-11-24	2015-12-02	8	I63.9	Cerebral infarction, unspecified	1	Y	I63.9
0156601	260491758	2015-11-24	2015-12-02	8	J96.00	Acute respiratory failure, unspecified whether wit	2	Y	I63.9, J96.00
0156601	260491758	2015-11-24	2015-12-02	8	J69.0	Pneumonitis due to inhalation of food and vomit	3	Y	I63.9, J96.00, J69.0
0156601	260491758	2015-11-24	2015-12-02	8	N17.9	Acute kidney failure, unspecified	4	Y	I63.9, J96.00, J69.0, N17.9
0156601	260491758	2015-11-24	2015-12-02	8	I67.4	Hypertensive encephalopathy	5	Y	I63.9, J96.00, J69.0, N17.9, I67.4
0156601	260491758	2015-11-24	2015-12-02	8	E11.9	Type 2 diabetes mellitus without complications	6	Y	I63.9, J96.00, J69.0, N17.9, I67.4, E11.9
0156601	260491758	2015-11-24	2015-12-02	8	B95.1	Streptococcus, group B, as the cause of diseases c	7	Y	I63.9, J96.00, J69.0, N17.9, I67.4, E11.9, B95.1
0156601	260491758	2015-11-24	2015-12-02	8	F33.1	Major depressive disorder, recurrent, moderate	8	Y	I63.9, J96.00, J69.0, N17.9, I67.4, E11.9, B95.1, F33.1
0156601	260491758	2015-11-24	2015-12-02	8	J98.11	Atelectasis	9	Y	I63.9, J96.00, J69.0, N17.9, I67.4, E11.9, B95.1, F33.1, J98.11
0156601	260491758	2015-11-24	2015-12-02	8	E78.5	Hyperlipidemia, unspecified	10	Y	I63.9, J96.00, J69.0, N17.9, I67.4, E11.9, B95.1, F33.1, J98.11, E78.5
0156601	260491758	2015-11-24	2015-12-02	8	I10	Essential (primary) hypertension	11	Y	I63.9, J96.00, J69.0, N17.9, I67.4, E11.9, B95.1, F33.1, J98.11, E78.5, I10
0156601	260491758	2015-11-24	2015-12-02	8	I25.10	Atherosclerotic heart disease of native coronary a	12	Y	I63.9, J96.00, J69.0, N17.9, I67.4, E11.9, B95.1, F33.1, J98.11, E78.5, I10, I25.10
0156601	260491758	2015-11-24	2015-12-02	8	K21.9	Gastro-esophageal reflux disease without esophagit	13	Y	I63.9, J96.00, J69.0, N17.9, I67.4, E11.9, B95.1, F33.1, J98.11, E78.5, I10, I25.10, K21.9
0156601	260491758	2015-11-24	2015-12-02	8	I34.0	Nonrheumatic mitral (valve) insufficiency	14	Y	I63.9, J96.00, J69.0, N17.9, I67.4, E11.9, B95.1, F33.1, J98.11, E78.5, I10, I25.10, K21.9, I34.0
0156601	260491758	2015-11-24	2015-12-02	8	I70.0	Atherosclerosis of aorta	15	Y	I63.9, J96.00, J69.0, N17.9, I67.4, E11.9, B95.1, F33.1, J98.11, E78.5, I10, I25.10, K21.9, I34.0, I70.0
0156601	260491758	2015-11-24	2015-12-02	8	D35.00	Benign neoplasm of unspecified adrenal gland	16	Y	I63.9, J96.00, J69.0, N17.9, I67.4, E11.9, B95.1, F33.1, J98.11, E78.5, I10, I25.10, K21.9, I34.0, I70.0, D35.00
0156601	260491758	2015-11-24	2015-12-02	8	E55.9	Vitamin D deficiency, unspecified	17	Y	I63.9, J96.00, J69.0, N17.9, I67.4, E11.9, B95.1, F33.1, J98.11, E78.5, I10, I25.10, K21.9, I34.0, I70.0, D35.00, E55.9
0156601	260491758	2015-11-24	2015-12-02	8	F43.29	Adjustment disorder with other symptoms	18	Y	I63.9, J96.00, J69.0, N17.9, I67.4, E11.9, B95.1, F33.1, J98.11, E78.5, I10, I25.10, K21.9, I34.0, I70.0, D35.00, E55.9, F43.29
0156601	260491758	2015-11-24	2015-12-02	8	F41.9	Anxiety disorder, unspecified	19	Y	I63.9, J96.00, J69.0, N17.9, I67.4, E11.9, B95.1, F33.1, J98.11, E78.5, I10, I25.10, K21.9, I34.0, I70.0, D35.00, E55.9, F43.29, F41.9
0156601	260491758	2015-11-24	2015-12-02	8	G25.81	Restless legs syndrome	20	Y	I63.9, J96.00, J69.0, N17.9, I67.4, E11.9, B95.1, F33.1, J98.11, E78.5, I10, I25.10, K21.9, I34.0, I70.0, D35.00, E55.9, F43.29, F41.9, G25.81
0156601	260491758	2015-11-24	2015-12-02	8	I51.7	Cardiomegaly	21	Y	I63.9, J96.00, J69.0, N17.9, I67.4, E11.9, B95.1, F33.1, J98.11, E78.5, I10, I25.10, K21.9, I34.0, I70.0, D35.00, E55.9, F43.29, F41.9, G25.81, I51.7
0156601	260491758	2015-11-24	2015-12-02	8	I25.2	Old myocardial infarction	22		I63.9, J96.00, J69.0, N17.9, I67.4, E11.9, B95.1, F33.1, J98.11, E78.5, I10, I25.10, K21.9, I34.0, I70.0, D35.00, E55.9, F43.29, F41.9, G25.81, I51.7, I25.2
0156601	260491758	2015-11-24	2015-12-02	8	Z88.0	Allergy status to penicillin	23		I63.9, J96.00, J69.0, N17.9, I67.4, E11.9, B95.1, F33.1, J98.11, E78.5, I10, I25.10, K21.9, I34.0, I70.0, D35.00, E55.9, F43.29, F41.9, G25.81, I51.7, I25.2, Z88.0
0156601	260491758	2015-11-24	2015-12-02	8	W18.30XA	Fall on same level, unspecified, initial encounter	24	Y	I63.9, J96.00, J69.0, N17.9, I67.4, E11.9, B95.1, F33.1, J98.11, E78.5, I10, I25.10, K21.9, I34.0, I70.0, D35.00, E55.9, F43.29, F41.9, G25.81, I51.7, I25.2, Z88.0, W18.30XA
0156601	260491758	2015-11-24	2015-12-02	8	Z91.040	Latex allergy status	25		I63.9, J96.00, J69.0, N17.9, I67.4, E11.9, B95.1, F33.1, J98.11, E78.5, I10, I25.10, K21.9, I34.0, I70.0, D35.00, E55.9, F43.29, F41.9, G25.81, I51.7, I25.2, Z88.0, W18.30XA, Z91.040
0156601	260491758	2015-11-24	2015-12-02	8	Z95.1	Presence of aortocoronary bypass graft	26		I63.9, J96.00, J69.0, N17.9, I67.4, E11.9, B95.1, F33.1, J98.11, E78.5, I10, I25.10, K21.9, I34.0, I70.0, D35.00, E55.9, F43.29, F41.9, G25.81, I51.7, I25.2, Z88.0, W18.30XA, Z91.040, Z95.1
0156601	260491758	2015-11-24	2015-12-02	8	Z86.73	Personal history of transient ischemic attack (TIA	27		I63.9, J96.00, J69.0, N17.9, I67.4, E11.9, B95.1, F33.1, J98.11, E78.5, I10, I25.10, K21.9, I34.0, I70.0, D35.00, E55.9, F43.29, F41.9, G25.81, I51.7, I25.2, Z88.0, W18.30XA, Z91.040, Z95.1, Z86.73
0156601	260491758	2015-11-24	2015-12-02	8	Z95.5	Presence of coronary angioplasty implant and graft	28		I63.9, J96.00, J69.0, N17.9, I67.4, E11.9, B95.1, F33.1, J98.11, E78.5, I10, I25.10, K21.9, I34.0, I70.0, D35.00, E55.9, F43.29, F41.9, G25.81, I51.7, I25.2, Z88.0, W18.30XA, Z91.040, Z95.1, Z86.73, Z95.5
0156601	260491758	2015-11-24	2015-12-02	8	Y92.009	Unspecified place in unspecified non-institutional	29		I63.9, J96.00, J69.0, N17.9, I67.4, E11.9, B95.1, F33.1, J98.11, E78.5, I10, I25.10, K21.9, I34.0, I70.0, D35.00, E55.9, F43.29, F41.9, G25.81, I51.7, I25.2, Z88.0, W18.30XA, Z91.040, Z95.1, Z86.73, Z95.5, Y92.009	Last
0157174	259011732	2015-10-04	2015-10-10	6	C25.3	Malignant neoplasm of pancreatic duct	1	Y	C25.3
0157174	259011732	2015-10-04	2015-10-10	6	K85.9	Acute pancreatitis, unspecified	2	Y	C25.3, K85.9
0157174	259011732	2015-10-04	2015-10-10	6	E87.2	Acidosis	3	Y	C25.3, K85.9, E87.2
0157174	259011732	2015-10-04	2015-10-10	6	K83.1	Obstruction of bile duct	4	Y	C25.3, K85.9, E87.2, K83.1
0157174	259011732	2015-10-04	2015-10-10	6	K22.10	Ulcer of esophagus without bleeding	5	Y	C25.3, K85.9, E87.2, K83.1, K22.10
0157174	259011732	2015-10-04	2015-10-10	6	J44.9	Chronic obstructive pulmonary disease, unspecified	6	Y	C25.3, K85.9, E87.2, K83.1, K22.10, J44.9
0157174	259011732	2015-10-04	2015-10-10	6	K22.70	Barretts esophagus without dysplasia	7	Y	C25.3, K85.9, E87.2, K83.1, K22.10, J44.9, K22.70
0157174	259011732	2015-10-04	2015-10-10	6	K26.9	Duodenal ulcer, unspecified as acute or chronic, w	8	Y	C25.3, K85.9, E87.2, K83.1, K22.10, J44.9, K22.70, K26.9
0157174	259011732	2015-10-04	2015-10-10	6	K81.9	Cholecystitis, unspecified	9	Y	C25.3, K85.9, E87.2, K83.1, K22.10, J44.9, K22.70, K26.9, K81.9
0157174	259011732	2015-10-04	2015-10-10	6	K21.9	Gastro-esophageal reflux disease without esophagit	10	Y	C25.3, K85.9, E87.2, K83.1, K22.10, J44.9, K22.70, K26.9, K81.9, K21.9
0157174	259011732	2015-10-04	2015-10-10	6	Z79.4	Long term (current) use of insulin	11		C25.3, K85.9, E87.2, K83.1, K22.10, J44.9, K22.70, K26.9, K81.9, K21.9, Z79.4
0157174	259011732	2015-10-04	2015-10-10	6	E03.9	Hypothyroidism, unspecified	12	Y	C25.3, K85.9, E87.2, K83.1, K22.10, J44.9, K22.70, K26.9, K81.9, K21.9, Z79.4, E03.9
0157174	259011732	2015-10-04	2015-10-10	6	I10	Essential (primary) hypertension	13	Y	C25.3, K85.9, E87.2, K83.1, K22.10, J44.9, K22.70, K26.9, K81.9, K21.9, Z79.4, E03.9, I10
0157174	259011732	2015-10-04	2015-10-10	6	E78.5	Hyperlipidemia, unspecified	14	Y	C25.3, K85.9, E87.2, K83.1, K22.10, J44.9, K22.70, K26.9, K81.9, K21.9, Z79.4, E03.9, I10, E78.5
0157174	259011732	2015-10-04	2015-10-10	6	F31.9	Bipolar disorder, unspecified	15	Y	C25.3, K85.9, E87.2, K83.1, K22.10, J44.9, K22.70, K26.9, K81.9, K21.9, Z79.4, E03.9, I10, E78.5, F31.9
0157174	259011732	2015-10-04	2015-10-10	6	E11.9	Type 2 diabetes mellitus without complications	16	Y	C25.3, K85.9, E87.2, K83.1, K22.10, J44.9, K22.70, K26.9, K81.9, K21.9, Z79.4, E03.9, I10, E78.5, F31.9, E11.9
0157174	259011732	2015-10-04	2015-10-10	6	G47.33	Obstructive sleep apnea (adult) (pediatric)	17	Y	C25.3, K85.9, E87.2, K83.1, K22.10, J44.9, K22.70, K26.9, K81.9, K21.9, Z79.4, E03.9, I10, E78.5, F31.9, E11.9, G47.33
0157174	259011732	2015-10-04	2015-10-10	6	Z86.73	Personal history of transient ischemic attack (TIA	18		C25.3, K85.9, E87.2, K83.1, K22.10, J44.9, K22.70, K26.9, K81.9, K21.9, Z79.4, E03.9, I10, E78.5, F31.9, E11.9, G47.33, Z86.73
0157174	259011732	2015-10-04	2015-10-10	6	F17.210	Nicotine dependence, cigarettes, uncomplicated	19	Y	C25.3, K85.9, E87.2, K83.1, K22.10, J44.9, K22.70, K26.9, K81.9, K21.9, Z79.4, E03.9, I10, E78.5, F31.9, E11.9, G47.33, Z86.73, F17.210
0157174	259011732	2015-10-04	2015-10-10	6	E87.6	Hypokalemia	20	Y	C25.3, K85.9, E87.2, K83.1, K22.10, J44.9, K22.70, K26.9, K81.9, K21.9, Z79.4, E03.9, I10, E78.5, F31.9, E11.9, G47.33, Z86.73, F17.210, E87.6
0157174	259011732	2015-10-04	2015-10-10	6	F41.9	Anxiety disorder, unspecified	21	Y	C25.3, K85.9, E87.2, K83.1, K22.10, J44.9, K22.70, K26.9, K81.9, K21.9, Z79.4, E03.9, I10, E78.5, F31.9, E11.9, G47.33, Z86.73, F17.210, E87.6, F41.9
0157174	259011732	2015-10-04	2015-10-10	6	K29.90	Gastroduodenitis, unspecified, without bleeding	22	Y	C25.3, K85.9, E87.2, K83.1, K22.10, J44.9, K22.70, K26.9, K81.9, K21.9, Z79.4, E03.9, I10, E78.5, F31.9, E11.9, G47.33, Z86.73, F17.210, E87.6, F41.9, K29.90
0157174	259011732	2015-10-04	2015-10-10	6	K44.9	Diaphragmatic hernia without obstruction or gangre	23	Y	C25.3, K85.9, E87.2, K83.1, K22.10, J44.9, K22.70, K26.9, K81.9, K21.9, Z79.4, E03.9, I10, E78.5, F31.9, E11.9, G47.33, Z86.73, F17.210, E87.6, F41.9, K29.90, K44.9	Last
0157332	261186647	2015-12-20	2015-12-31	11	F10.231	Alcohol dependence with withdrawal delirium	1	Y	F10.231
0157332	261186647	2015-12-20	2015-12-31	11	E87.2	Acidosis	2	Y	F10.231, E87.2
0157332	261186647	2015-12-20	2015-12-31	11	K76.6	Portal hypertension	3	Y	F10.231, E87.2, K76.6
0157332	261186647	2015-12-20	2015-12-31	11	I85.00	Esophageal varices without bleeding	4	Y	F10.231, E87.2, K76.6, I85.00
0157332	261186647	2015-12-20	2015-12-31	11	K80.00	Calculus of gallbladder with acute cholecystitis w	5	Y	F10.231, E87.2, K76.6, I85.00, K80.00
0157332	261186647	2015-12-20	2015-12-31	11	I95.9	Hypotension, unspecified	6	N	F10.231, E87.2, K76.6, I85.00, K80.00, I95.9
0157332	261186647	2015-12-20	2015-12-31	11	D69.6	Thrombocytopenia, unspecified	7	Y	F10.231, E87.2, K76.6, I85.00, K80.00, I95.9, D69.6
0157332	261186647	2015-12-20	2015-12-31	11	K92.2	Gastrointestinal hemorrhage, unspecified	8	Y	F10.231, E87.2, K76.6, I85.00, K80.00, I95.9, D69.6, K92.2
0157332	261186647	2015-12-20	2015-12-31	11	K50.90	Crohns disease, unspecified, without complications	9	Y	F10.231, E87.2, K76.6, I85.00, K80.00, I95.9, D69.6, K92.2, K50.90
0157332	261186647	2015-12-20	2015-12-31	11	K70.40	Alcoholic hepatic failure without coma	10	Y	F10.231, E87.2, K76.6, I85.00, K80.00, I95.9, D69.6, K92.2, K50.90, K70.40
0157332	261186647	2015-12-20	2015-12-31	11	K70.31	Alcoholic cirrhosis of liver with ascites	11	Y	F10.231, E87.2, K76.6, I85.00, K80.00, I95.9, D69.6, K92.2, K50.90, K70.40, K70.31
0157332	261186647	2015-12-20	2015-12-31	11	D50.0	Iron deficiency anemia secondary to blood loss (ch	12	Y	F10.231, E87.2, K76.6, I85.00, K80.00, I95.9, D69.6, K92.2, K50.90, K70.40, K70.31, D50.0
0157332	261186647	2015-12-20	2015-12-31	11	K31.89	Other diseases of stomach and duodenum	13	Y	F10.231, E87.2, K76.6, I85.00, K80.00, I95.9, D69.6, K92.2, K50.90, K70.40, K70.31, D50.0, K31.89
0157332	261186647	2015-12-20	2015-12-31	11	I10	Essential (primary) hypertension	14	Y	F10.231, E87.2, K76.6, I85.00, K80.00, I95.9, D69.6, K92.2, K50.90, K70.40, K70.31, D50.0, K31.89, I10
0157332	261186647	2015-12-20	2015-12-31	11	B19.20	Unspecified viral hepatitis C without hepatic coma	15	Y	F10.231, E87.2, K76.6, I85.00, K80.00, I95.9, D69.6, K92.2, K50.90, K70.40, K70.31, D50.0, K31.89, I10, B19.20
0157332	261186647	2015-12-20	2015-12-31	11	K29.70	Gastritis, unspecified, without bleeding	16	Y	F10.231, E87.2, K76.6, I85.00, K80.00, I95.9, D69.6, K92.2, K50.90, K70.40, K70.31, D50.0, K31.89, I10, B19.20, K29.70
0157332	261186647	2015-12-20	2015-12-31	11	F22	Delusional disorders	17	N	F10.231, E87.2, K76.6, I85.00, K80.00, I95.9, D69.6, K92.2, K50.90, K70.40, K70.31, D50.0, K31.89, I10, B19.20, K29.70, F22
0157332	261186647	2015-12-20	2015-12-31	11	E87.6	Hypokalemia	18	N	F10.231, E87.2, K76.6, I85.00, K80.00, I95.9, D69.6, K92.2, K50.90, K70.40, K70.31, D50.0, K31.89, I10, B19.20, K29.70, F22, E87.6
0157332	261186647	2015-12-20	2015-12-31	11	E83.42	Hypomagnesemia	19	N	F10.231, E87.2, K76.6, I85.00, K80.00, I95.9, D69.6, K92.2, K50.90, K70.40, K70.31, D50.0, K31.89, I10, B19.20, K29.70, F22, E87.6, E83.42
0157332	261186647	2015-12-20	2015-12-31	11	R16.1	Splenomegaly, not elsewhere classified	20	Y	F10.231, E87.2, K76.6, I85.00, K80.00, I95.9, D69.6, K92.2, K50.90, K70.40, K70.31, D50.0, K31.89, I10, B19.20, K29.70, F22, E87.6, E83.42, R16.1
0157332	261186647	2015-12-20	2015-12-31	11	R06.00	Dyspnea, unspecified	21	N	F10.231, E87.2, K76.6, I85.00, K80.00, I95.9, D69.6, K92.2, K50.90, K70.40, K70.31, D50.0, K31.89, I10, B19.20, K29.70, F22, E87.6, E83.42, R16.1, R06.00
0157332	261186647	2015-12-20	2015-12-31	11	N39.490	Overflow incontinence	22	N	F10.231, E87.2, K76.6, I85.00, K80.00, I95.9, D69.6, K92.2, K50.90, K70.40, K70.31, D50.0, K31.89, I10, B19.20, K29.70, F22, E87.6, E83.42, R16.1, R06.00, N39.490
0157332	261186647	2015-12-20	2015-12-31	11	G40.909	Epilepsy, unspecified, not intractable, without st	23	Y	F10.231, E87.2, K76.6, I85.00, K80.00, I95.9, D69.6, K92.2, K50.90, K70.40, K70.31, D50.0, K31.89, I10, B19.20, K29.70, F22, E87.6, E83.42, R16.1, R06.00, N39.490, G40.909
0157332	261186647	2015-12-20	2015-12-31	11	G62.9	Polyneuropathy, unspecified	24	Y	F10.231, E87.2, K76.6, I85.00, K80.00, I95.9, D69.6, K92.2, K50.90, K70.40, K70.31, D50.0, K31.89, I10, B19.20, K29.70, F22, E87.6, E83.42, R16.1, R06.00, N39.490, G40.909, G62.9
0157332	261186647	2015-12-20	2015-12-31	11	F31.9	Bipolar disorder, unspecified	25	Y	F10.231, E87.2, K76.6, I85.00, K80.00, I95.9, D69.6, K92.2, K50.90, K70.40, K70.31, D50.0, K31.89, I10, B19.20, K29.70, F22, E87.6, E83.42, R16.1, R06.00, N39.490, G40.909, G62.9, F31.9
0157332	261186647	2015-12-20	2015-12-31	11	F41.8	Other specified anxiety disorders	26	Y	F10.231, E87.2, K76.6, I85.00, K80.00, I95.9, D69.6, K92.2, K50.90, K70.40, K70.31, D50.0, K31.89, I10, B19.20, K29.70, F22, E87.6, E83.42, R16.1, R06.00, N39.490, G40.909, G62.9, F31.9, F41.8
0157332	261186647	2015-12-20	2015-12-31	11	R29.6	Repeated falls	27	Y	F10.231, E87.2, K76.6, I85.00, K80.00, I95.9, D69.6, K92.2, K50.90, K70.40, K70.31, D50.0, K31.89, I10, B19.20, K29.70, F22, E87.6, E83.42, R16.1, R06.00, N39.490, G40.909, G62.9, F31.9, F41.8, R29.6
0157332	261186647	2015-12-20	2015-12-31	11	Z93.2	Ileostomy status	28		F10.231, E87.2, K76.6, I85.00, K80.00, I95.9, D69.6, K92.2, K50.90, K70.40, K70.31, D50.0, K31.89, I10, B19.20, K29.70, F22, E87.6, E83.42, R16.1, R06.00, N39.490, G40.909, G62.9, F31.9, F41.8, R29.6, Z93.2
0157332	261186647	2015-12-20	2015-12-31	11	Z91.19	Patients noncompliance with other medical treatmen	29	Y	F10.231, E87.2, K76.6, I85.00, K80.00, I95.9, D69.6, K92.2, K50.90, K70.40, K70.31, D50.0, K31.89, I10, B19.20, K29.70, F22, E87.6, E83.42, R16.1, R06.00, N39.490, G40.909, G62.9, F31.9, F41.8, R29.6, Z93.2, Z91.19	Last
0159730	262111602	2016-01-25	2016-01-30	5	S42.201A	Unspecified fracture of upper end of right humerus	1	Y	S42.201A
0159730	262111602	2016-01-25	2016-01-30	5	E22.2	Syndrome of inappropriate secretion of antidiureti	2	Y	S42.201A, E22.2
0159730	262111602	2016-01-25	2016-01-30	5	S72.051A	Unspecified fracture of head of right femur, initi	3	Y	S42.201A, E22.2, S72.051A
0159730	262111602	2016-01-25	2016-01-30	5	D69.6	Thrombocytopenia, unspecified	4	Y	S42.201A, E22.2, S72.051A, D69.6
0159730	262111602	2016-01-25	2016-01-30	5	D62	Acute posthemorrhagic anemia	5	N	S42.201A, E22.2, S72.051A, D69.6, D62
0159730	262111602	2016-01-25	2016-01-30	5	N39.0	Urinary tract infection, site not specified	6	Y	S42.201A, E22.2, S72.051A, D69.6, D62, N39.0
0159730	262111602	2016-01-25	2016-01-30	5	J43.9	Emphysema, unspecified	7	Y	S42.201A, E22.2, S72.051A, D69.6, D62, N39.0, J43.9
0159730	262111602	2016-01-25	2016-01-30	5	D50.9	Iron deficiency anemia, unspecified	8	Y	S42.201A, E22.2, S72.051A, D69.6, D62, N39.0, J43.9, D50.9
0159730	262111602	2016-01-25	2016-01-30	5	E11.9	Type 2 diabetes mellitus without complications	9	Y	S42.201A, E22.2, S72.051A, D69.6, D62, N39.0, J43.9, D50.9, E11.9
0159730	262111602	2016-01-25	2016-01-30	5	B19.20	Unspecified viral hepatitis C without hepatic coma	10	Y	S42.201A, E22.2, S72.051A, D69.6, D62, N39.0, J43.9, D50.9, E11.9, B19.20
0159730	262111602	2016-01-25	2016-01-30	5	D53.9	Nutritional anemia, unspecified	11	Y	S42.201A, E22.2, S72.051A, D69.6, D62, N39.0, J43.9, D50.9, E11.9, B19.20, D53.9
0159730	262111602	2016-01-25	2016-01-30	5	F10.10	Alcohol abuse, uncomplicated	12	Y	S42.201A, E22.2, S72.051A, D69.6, D62, N39.0, J43.9, D50.9, E11.9, B19.20, D53.9, F10.10
0159730	262111602	2016-01-25	2016-01-30	5	F25.0	Schizoaffective disorder, bipolar type	13	Y	S42.201A, E22.2, S72.051A, D69.6, D62, N39.0, J43.9, D50.9, E11.9, B19.20, D53.9, F10.10, F25.0
0159730	262111602	2016-01-25	2016-01-30	5	F41.9	Anxiety disorder, unspecified	14	Y	S42.201A, E22.2, S72.051A, D69.6, D62, N39.0, J43.9, D50.9, E11.9, B19.20, D53.9, F10.10, F25.0, F41.9
0159730	262111602	2016-01-25	2016-01-30	5	I10	Essential (primary) hypertension	15	Y	S42.201A, E22.2, S72.051A, D69.6, D62, N39.0, J43.9, D50.9, E11.9, B19.20, D53.9, F10.10, F25.0, F41.9, I10
0159730	262111602	2016-01-25	2016-01-30	5	W00.0XXA	Fall on same level due to ice and snow, initial en	16	Y	S42.201A, E22.2, S72.051A, D69.6, D62, N39.0, J43.9, D50.9, E11.9, B19.20, D53.9, F10.10, F25.0, F41.9, I10, W00.0XXA
0159730	262111602	2016-01-25	2016-01-30	5	F32.9	Major depressive disorder, single episode, unspeci	17	Y	S42.201A, E22.2, S72.051A, D69.6, D62, N39.0, J43.9, D50.9, E11.9, B19.20, D53.9, F10.10, F25.0, F41.9, I10, W00.0XXA, F32.9
0159730	262111602	2016-01-25	2016-01-30	5	M54.9	Dorsalgia, unspecified	18	Y	S42.201A, E22.2, S72.051A, D69.6, D62, N39.0, J43.9, D50.9, E11.9, B19.20, D53.9, F10.10, F25.0, F41.9, I10, W00.0XXA, F32.9, M54.9
0159730	262111602	2016-01-25	2016-01-30	5	G89.29	Other chronic pain	19	Y	S42.201A, E22.2, S72.051A, D69.6, D62, N39.0, J43.9, D50.9, E11.9, B19.20, D53.9, F10.10, F25.0, F41.9, I10, W00.0XXA, F32.9, M54.9, G89.29
0159730	262111602	2016-01-25	2016-01-30	5	I25.10	Atherosclerotic heart disease of native coronary a	20	Y	S42.201A, E22.2, S72.051A, D69.6, D62, N39.0, J43.9, D50.9, E11.9, B19.20, D53.9, F10.10, F25.0, F41.9, I10, W00.0XXA, F32.9, M54.9, G89.29, I25.10
0159730	262111602	2016-01-25	2016-01-30	5	K80.20	Calculus of gallbladder without cholecystitis with	21	Y	S42.201A, E22.2, S72.051A, D69.6, D62, N39.0, J43.9, D50.9, E11.9, B19.20, D53.9, F10.10, F25.0, F41.9, I10, W00.0XXA, F32.9, M54.9, G89.29, I25.10, K80.20
0159730	262111602	2016-01-25	2016-01-30	5	K57.30	Diverticulosis of large intestine without perforat	22	Y	S42.201A, E22.2, S72.051A, D69.6, D62, N39.0, J43.9, D50.9, E11.9, B19.20, D53.9, F10.10, F25.0, F41.9, I10, W00.0XXA, F32.9, M54.9, G89.29, I25.10, K80.20, K57.30
0159730	262111602	2016-01-25	2016-01-30	5	D63.8	Anemia in other chronic diseases classified elsewh	23	Y	S42.201A, E22.2, S72.051A, D69.6, D62, N39.0, J43.9, D50.9, E11.9, B19.20, D53.9, F10.10, F25.0, F41.9, I10, W00.0XXA, F32.9, M54.9, G89.29, I25.10, K80.20, K57.30, D63.8
0159730	262111602	2016-01-25	2016-01-30	5	I73.9	Peripheral vascular disease, unspecified	24	Y	S42.201A, E22.2, S72.051A, D69.6, D62, N39.0, J43.9, D50.9, E11.9, B19.20, D53.9, F10.10, F25.0, F41.9, I10, W00.0XXA, F32.9, M54.9, G89.29, I25.10, K80.20, K57.30, D63.8, I73.9
0159730	262111602	2016-01-25	2016-01-30	5	K59.00	Constipation, unspecified	25	Y	S42.201A, E22.2, S72.051A, D69.6, D62, N39.0, J43.9, D50.9, E11.9, B19.20, D53.9, F10.10, F25.0, F41.9, I10, W00.0XXA, F32.9, M54.9, G89.29, I25.10, K80.20, K57.30, D63.8, I73.9, K59.00
0159730	262111602	2016-01-25	2016-01-30	5	S30.0XXA	Contusion of lower back and pelvis, initial encoun	26	Y	S42.201A, E22.2, S72.051A, D69.6, D62, N39.0, J43.9, D50.9, E11.9, B19.20, D53.9, F10.10, F25.0, F41.9, I10, W00.0XXA, F32.9, M54.9, G89.29, I25.10, K80.20, K57.30, D63.8, I73.9, K59.00, S30.0XXA
0159730	262111602	2016-01-25	2016-01-30	5	Z72.0	Tobacco use	27		S42.201A, E22.2, S72.051A, D69.6, D62, N39.0, J43.9, D50.9, E11.9, B19.20, D53.9, F10.10, F25.0, F41.9, I10, W00.0XXA, F32.9, M54.9, G89.29, I25.10, K80.20, K57.30, D63.8, I73.9, K59.00, S30.0XXA, Z72.0
0159730	262111602	2016-01-25	2016-01-30	5	Y92.009	Unspecified place in unspecified non-institutional	28		S42.201A, E22.2, S72.051A, D69.6, D62, N39.0, J43.9, D50.9, E11.9, B19.20, D53.9, F10.10, F25.0, F41.9, I10, W00.0XXA, F32.9, M54.9, G89.29, I25.10, K80.20, K57.30, D63.8, I73.9, K59.00, S30.0XXA, Z72.0, Y92.009	Last
0159984	260289319	2015-11-17	2015-11-25	8	J96.01	Acute respiratory failure with hypoxia	1	Y	J96.01
0159984	260289319	2015-11-17	2015-11-25	8	I50.23	Acute on chronic systolic (congestive) heart failu	2	Y	J96.01, I50.23
0159984	260289319	2015-11-17	2015-11-25	8	J44.1	Chronic obstructive pulmonary disease with (acute)	3	Y	J96.01, I50.23, J44.1
0159984	260289319	2015-11-17	2015-11-25	8	E11.40	Type 2 diabetes mellitus with diabetic neuropathy,	4	Y	J96.01, I50.23, J44.1, E11.40
0159984	260289319	2015-11-17	2015-11-25	8	E11.621	Type 2 diabetes mellitus with foot ulcer	5	Y	J96.01, I50.23, J44.1, E11.40, E11.621
0159984	260289319	2015-11-17	2015-11-25	8	L03.116	Cellulitis of left lower limb	6	Y	J96.01, I50.23, J44.1, E11.40, E11.621, L03.116
0159984	260289319	2015-11-17	2015-11-25	8	Z68.42	Body mass index (BMI) 45.0-49.9, adult	7		J96.01, I50.23, J44.1, E11.40, E11.621, L03.116, Z68.42
0159984	260289319	2015-11-17	2015-11-25	8	Z99.81	Dependence on supplemental oxygen	8		J96.01, I50.23, J44.1, E11.40, E11.621, L03.116, Z68.42, Z99.81
0159984	260289319	2015-11-17	2015-11-25	8	I25.5	Ischemic cardiomyopathy	9	Y	J96.01, I50.23, J44.1, E11.40, E11.621, L03.116, Z68.42, Z99.81, I25.5
0159984	260289319	2015-11-17	2015-11-25	8	B95.1	Streptococcus, group B, as the cause of diseases c	10	Y	J96.01, I50.23, J44.1, E11.40, E11.621, L03.116, Z68.42, Z99.81, I25.5, B95.1
0159984	260289319	2015-11-17	2015-11-25	8	E66.9	Obesity, unspecified	11	Y	J96.01, I50.23, J44.1, E11.40, E11.621, L03.116, Z68.42, Z99.81, I25.5, B95.1, E66.9
0159984	260289319	2015-11-17	2015-11-25	8	G47.33	Obstructive sleep apnea (adult) (pediatric)	12	Y	J96.01, I50.23, J44.1, E11.40, E11.621, L03.116, Z68.42, Z99.81, I25.5, B95.1, E66.9, G47.33
0159984	260289319	2015-11-17	2015-11-25	8	I25.10	Atherosclerotic heart disease of native coronary a	13	Y	J96.01, I50.23, J44.1, E11.40, E11.621, L03.116, Z68.42, Z99.81, I25.5, B95.1, E66.9, G47.33, I25.10
0159984	260289319	2015-11-17	2015-11-25	8	I25.2	Old myocardial infarction	14		J96.01, I50.23, J44.1, E11.40, E11.621, L03.116, Z68.42, Z99.81, I25.5, B95.1, E66.9, G47.33, I25.10, I25.2
0159984	260289319	2015-11-17	2015-11-25	8	I10	Essential (primary) hypertension	15	Y	J96.01, I50.23, J44.1, E11.40, E11.621, L03.116, Z68.42, Z99.81, I25.5, B95.1, E66.9, G47.33, I25.10, I25.2, I10
0159984	260289319	2015-11-17	2015-11-25	8	Z95.5	Presence of coronary angioplasty implant and graft	16		J96.01, I50.23, J44.1, E11.40, E11.621, L03.116, Z68.42, Z99.81, I25.5, B95.1, E66.9, G47.33, I25.10, I25.2, I10, Z95.5
0159984	260289319	2015-11-17	2015-11-25	8	Z79.4	Long term (current) use of insulin	17		J96.01, I50.23, J44.1, E11.40, E11.621, L03.116, Z68.42, Z99.81, I25.5, B95.1, E66.9, G47.33, I25.10, I25.2, I10, Z95.5, Z79.4
0159984	260289319	2015-11-17	2015-11-25	8	L97.529	Non-pressure chronic ulcer of other part of left f	18	Y	J96.01, I50.23, J44.1, E11.40, E11.621, L03.116, Z68.42, Z99.81, I25.5, B95.1, E66.9, G47.33, I25.10, I25.2, I10, Z95.5, Z79.4, L97.529
0159984	260289319	2015-11-17	2015-11-25	8	L89.899	Pressure ulcer of other site, unspecified stage	19	Y	J96.01, I50.23, J44.1, E11.40, E11.621, L03.116, Z68.42, Z99.81, I25.5, B95.1, E66.9, G47.33, I25.10, I25.2, I10, Z95.5, Z79.4, L97.529, L89.899
0159984	260289319	2015-11-17	2015-11-25	8	F17.210	Nicotine dependence, cigarettes, uncomplicated	20	Y	J96.01, I50.23, J44.1, E11.40, E11.621, L03.116, Z68.42, Z99.81, I25.5, B95.1, E66.9, G47.33, I25.10, I25.2, I10, Z95.5, Z79.4, L97.529, L89.899, F17.210
0159984	260289319	2015-11-17	2015-11-25	8	Z79.02	Long term (current) use of antithrombotics/antipla	21		J96.01, I50.23, J44.1, E11.40, E11.621, L03.116, Z68.42, Z99.81, I25.5, B95.1, E66.9, G47.33, I25.10, I25.2, I10, Z95.5, Z79.4, L97.529, L89.899, F17.210, Z79.02
0159984	260289319	2015-11-17	2015-11-25	8	Z86.14	Personal history of Methicillin resistant Staphylo	22		J96.01, I50.23, J44.1, E11.40, E11.621, L03.116, Z68.42, Z99.81, I25.5, B95.1, E66.9, G47.33, I25.10, I25.2, I10, Z95.5, Z79.4, L97.529, L89.899, F17.210, Z79.02, Z86.14	Last
0160572	261570634	2016-01-06	2016-01-12	6	G92	Toxic encephalopathy	1	Y	G92
0160572	261570634	2016-01-06	2016-01-12	6	N17.9	Acute kidney failure, unspecified	2	Y	G92, N17.9
0160572	261570634	2016-01-06	2016-01-12	6	E87.2	Acidosis	3	Y	G92, N17.9, E87.2
0160572	261570634	2016-01-06	2016-01-12	6	I50.22	Chronic systolic (congestive) heart failure	4	Y	G92, N17.9, E87.2, I50.22
0160572	261570634	2016-01-06	2016-01-12	6	E11.621	Type 2 diabetes mellitus with foot ulcer	5	Y	G92, N17.9, E87.2, I50.22, E11.621
0160572	261570634	2016-01-06	2016-01-12	6	M86.672	Other chronic osteomyelitis, left ankle and foot	6	Y	G92, N17.9, E87.2, I50.22, E11.621, M86.672
0160572	261570634	2016-01-06	2016-01-12	6	M86.8X7	Other osteomyelitis, ankle and foot	7	Y	G92, N17.9, E87.2, I50.22, E11.621, M86.672, M86.8X7
0160572	261570634	2016-01-06	2016-01-12	6	R13.19	Other dysphagia	8	Y	G92, N17.9, E87.2, I50.22, E11.621, M86.672, M86.8X7, R13.19
0160572	261570634	2016-01-06	2016-01-12	6	F41.9	Anxiety disorder, unspecified	9	Y	G92, N17.9, E87.2, I50.22, E11.621, M86.672, M86.8X7, R13.19, F41.9
0160572	261570634	2016-01-06	2016-01-12	6	J45.909	Unspecified asthma, uncomplicated	10	Y	G92, N17.9, E87.2, I50.22, E11.621, M86.672, M86.8X7, R13.19, F41.9, J45.909
0160572	261570634	2016-01-06	2016-01-12	6	E78.5	Hyperlipidemia, unspecified	11	Y	G92, N17.9, E87.2, I50.22, E11.621, M86.672, M86.8X7, R13.19, F41.9, J45.909, E78.5
0160572	261570634	2016-01-06	2016-01-12	6	F32.9	Major depressive disorder, single episode, unspeci	12	Y	G92, N17.9, E87.2, I50.22, E11.621, M86.672, M86.8X7, R13.19, F41.9, J45.909, E78.5, F32.9
0160572	261570634	2016-01-06	2016-01-12	6	K21.9	Gastro-esophageal reflux disease without esophagit	13	Y	G92, N17.9, E87.2, I50.22, E11.621, M86.672, M86.8X7, R13.19, F41.9, J45.909, E78.5, F32.9, K21.9
0160572	261570634	2016-01-06	2016-01-12	6	E86.0	Dehydration	14	Y	G92, N17.9, E87.2, I50.22, E11.621, M86.672, M86.8X7, R13.19, F41.9, J45.909, E78.5, F32.9, K21.9, E86.0
0160572	261570634	2016-01-06	2016-01-12	6	E11.65	Type 2 diabetes mellitus with hyperglycemia	15	Y	G92, N17.9, E87.2, I50.22, E11.621, M86.672, M86.8X7, R13.19, F41.9, J45.909, E78.5, F32.9, K21.9, E86.0, E11.65
0160572	261570634	2016-01-06	2016-01-12	6	L97.529	Non-pressure chronic ulcer of other part of left f	16	Y	G92, N17.9, E87.2, I50.22, E11.621, M86.672, M86.8X7, R13.19, F41.9, J45.909, E78.5, F32.9, K21.9, E86.0, E11.65, L97.529
0160572	261570634	2016-01-06	2016-01-12	6	J33.0	Polyp of nasal cavity	17	Y	G92, N17.9, E87.2, I50.22, E11.621, M86.672, M86.8X7, R13.19, F41.9, J45.909, E78.5, F32.9, K21.9, E86.0, E11.65, L97.529, J33.0
0160572	261570634	2016-01-06	2016-01-12	6	D64.9	Anemia, unspecified	18	Y	G92, N17.9, E87.2, I50.22, E11.621, M86.672, M86.8X7, R13.19, F41.9, J45.909, E78.5, F32.9, K21.9, E86.0, E11.65, L97.529, J33.0, D64.9
0160572	261570634	2016-01-06	2016-01-12	6	N18.3	Chronic kidney disease, stage 3 (moderate)	19	Y	G92, N17.9, E87.2, I50.22, E11.621, M86.672, M86.8X7, R13.19, F41.9, J45.909, E78.5, F32.9, K21.9, E86.0, E11.65, L97.529, J33.0, D64.9, N18.3
0160572	261570634	2016-01-06	2016-01-12	6	E34.9	Endocrine disorder, unspecified	20	Y	G92, N17.9, E87.2, I50.22, E11.621, M86.672, M86.8X7, R13.19, F41.9, J45.909, E78.5, F32.9, K21.9, E86.0, E11.65, L97.529, J33.0, D64.9, N18.3, E34.9
0160572	261570634	2016-01-06	2016-01-12	6	E66.9	Obesity, unspecified	21	Y	G92, N17.9, E87.2, I50.22, E11.621, M86.672, M86.8X7, R13.19, F41.9, J45.909, E78.5, F32.9, K21.9, E86.0, E11.65, L97.529, J33.0, D64.9, N18.3, E34.9, E66.9
0160572	261570634	2016-01-06	2016-01-12	6	I12.9	Hypertensive chronic kidney disease with stage 1 t	22	Y	G92, N17.9, E87.2, I50.22, E11.621, M86.672, M86.8X7, R13.19, F41.9, J45.909, E78.5, F32.9, K21.9, E86.0, E11.65, L97.529, J33.0, D64.9, N18.3, E34.9, E66.9, I12.9
0160572	261570634	2016-01-06	2016-01-12	6	I25.5	Ischemic cardiomyopathy	23	Y	G92, N17.9, E87.2, I50.22, E11.621, M86.672, M86.8X7, R13.19, F41.9, J45.909, E78.5, F32.9, K21.9, E86.0, E11.65, L97.529, J33.0, D64.9, N18.3, E34.9, E66.9, I12.9, I25.5
0160572	261570634	2016-01-06	2016-01-12	6	I73.9	Peripheral vascular disease, unspecified	24	Y	G92, N17.9, E87.2, I50.22, E11.621, M86.672, M86.8X7, R13.19, F41.9, J45.909, E78.5, F32.9, K21.9, E86.0, E11.65, L97.529, J33.0, D64.9, N18.3, E34.9, E66.9, I12.9, I25.5, I73.9
0160572	261570634	2016-01-06	2016-01-12	6	Z87.891	Personal history of nicotine dependence	25		G92, N17.9, E87.2, I50.22, E11.621, M86.672, M86.8X7, R13.19, F41.9, J45.909, E78.5, F32.9, K21.9, E86.0, E11.65, L97.529, J33.0, D64.9, N18.3, E34.9, E66.9, I12.9, I25.5, I73.9, Z87.891
0160572	261570634	2016-01-06	2016-01-12	6	Z88.0	Allergy status to penicillin	26		G92, N17.9, E87.2, I50.22, E11.621, M86.672, M86.8X7, R13.19, F41.9, J45.909, E78.5, F32.9, K21.9, E86.0, E11.65, L97.529, J33.0, D64.9, N18.3, E34.9, E66.9, I12.9, I25.5, I73.9, Z87.891, Z88.0
0160572	261570634	2016-01-06	2016-01-12	6	Z79.4	Long term (current) use of insulin	27		G92, N17.9, E87.2, I50.22, E11.621, M86.672, M86.8X7, R13.19, F41.9, J45.909, E78.5, F32.9, K21.9, E86.0, E11.65, L97.529, J33.0, D64.9, N18.3, E34.9, E66.9, I12.9, I25.5, I73.9, Z87.891, Z88.0, Z79.4	Last
0163083	262683204	2016-02-12	2016-02-18	6	A41.9	Sepsis, unspecified organism	1	Y	A41.9
0163083	262683204	2016-02-12	2016-02-18	6	R65.20	Severe sepsis without septic shock	2	Y	A41.9, R65.20
0163083	262683204	2016-02-12	2016-02-18	6	I12.0	Hypertensive chronic kidney disease with stage 5 c	3	Y	A41.9, R65.20, I12.0
0163083	262683204	2016-02-12	2016-02-18	6	N18.6	End stage renal disease	4	Y	A41.9, R65.20, I12.0, N18.6
0163083	262683204	2016-02-12	2016-02-18	6	I48.91	Unspecified atrial fibrillation	5	Y	A41.9, R65.20, I12.0, N18.6, I48.91
0163083	262683204	2016-02-12	2016-02-18	6	L02.416	Cutaneous abscess of left lower limb	6	Y	A41.9, R65.20, I12.0, N18.6, I48.91, L02.416
0163083	262683204	2016-02-12	2016-02-18	6	L03.116	Cellulitis of left lower limb	7	Y	A41.9, R65.20, I12.0, N18.6, I48.91, L02.416, L03.116
0163083	262683204	2016-02-12	2016-02-18	6	E87.1	Hypo-osmolality and hyponatremia	8	Y	A41.9, R65.20, I12.0, N18.6, I48.91, L02.416, L03.116, E87.1
0163083	262683204	2016-02-12	2016-02-18	6	G47.33	Obstructive sleep apnea (adult) (pediatric)	9	Y	A41.9, R65.20, I12.0, N18.6, I48.91, L02.416, L03.116, E87.1, G47.33
0163083	262683204	2016-02-12	2016-02-18	6	K59.00	Constipation, unspecified	10	Y	A41.9, R65.20, I12.0, N18.6, I48.91, L02.416, L03.116, E87.1, G47.33, K59.00
0163083	262683204	2016-02-12	2016-02-18	6	E87.5	Hyperkalemia	11	Y	A41.9, R65.20, I12.0, N18.6, I48.91, L02.416, L03.116, E87.1, G47.33, K59.00, E87.5
0163083	262683204	2016-02-12	2016-02-18	6	E11.9	Type 2 diabetes mellitus without complications	12	Y	A41.9, R65.20, I12.0, N18.6, I48.91, L02.416, L03.116, E87.1, G47.33, K59.00, E87.5, E11.9
0163083	262683204	2016-02-12	2016-02-18	6	I25.10	Atherosclerotic heart disease of native coronary a	13	Y	A41.9, R65.20, I12.0, N18.6, I48.91, L02.416, L03.116, E87.1, G47.33, K59.00, E87.5, E11.9, I25.10
0163083	262683204	2016-02-12	2016-02-18	6	Z99.2	Dependence on renal dialysis	14		A41.9, R65.20, I12.0, N18.6, I48.91, L02.416, L03.116, E87.1, G47.33, K59.00, E87.5, E11.9, I25.10, Z99.2
0163083	262683204	2016-02-12	2016-02-18	6	Z79.4	Long term (current) use of insulin	15		A41.9, R65.20, I12.0, N18.6, I48.91, L02.416, L03.116, E87.1, G47.33, K59.00, E87.5, E11.9, I25.10, Z99.2, Z79.4
0163083	262683204	2016-02-12	2016-02-18	6	Z95.5	Presence of coronary angioplasty implant and graft	16		A41.9, R65.20, I12.0, N18.6, I48.91, L02.416, L03.116, E87.1, G47.33, K59.00, E87.5, E11.9, I25.10, Z99.2, Z79.4, Z95.5	Last
0163285	262130404	2016-01-25	2016-01-27	2	I25.110	Atherosclerotic heart disease of native coronary a	1	Y	I25.110
0163285	262130404	2016-01-25	2016-01-27	2	E78.5	Hyperlipidemia, unspecified	2	Y	I25.110, E78.5
0163285	262130404	2016-01-25	2016-01-27	2	Z21	Asymptomatic human immunodeficiency virus HIV infe	3	Y	I25.110, E78.5, Z21
0163285	262130404	2016-01-25	2016-01-27	2	I10	Essential (primary) hypertension	4	Y	I25.110, E78.5, Z21, I10
0163285	262130404	2016-01-25	2016-01-27	2	F17.210	Nicotine dependence, cigarettes, uncomplicated	5	Y	I25.110, E78.5, Z21, I10, F17.210
0163285	262130404	2016-01-25	2016-01-27	2	Z96.652	Presence of left artificial knee joint	6	Y	I25.110, E78.5, Z21, I10, F17.210, Z96.652
0163285	262130404	2016-01-25	2016-01-27	2	Z82.49	Family history of ischemic heart disease and other	7		I25.110, E78.5, Z21, I10, F17.210, Z96.652, Z82.49	Last
0167844	262783467	2016-02-16	2016-02-24	8	J44.1	Chronic obstructive pulmonary disease with (acute)	1	Y	J44.1
0167844	262783467	2016-02-16	2016-02-24	8	I50.9	Heart failure, unspecified	2	Y	J44.1, I50.9
0167844	262783467	2016-02-16	2016-02-24	8	F03.90	Unspecified dementia without behavioral disturbanc	3	Y	J44.1, I50.9, F03.90
0167844	262783467	2016-02-16	2016-02-24	8	E11.9	Type 2 diabetes mellitus without complications	4	Y	J44.1, I50.9, F03.90, E11.9
0167844	262783467	2016-02-16	2016-02-24	8	D72.829	Elevated white blood cell count, unspecified	5	Y	J44.1, I50.9, F03.90, E11.9, D72.829
0167844	262783467	2016-02-16	2016-02-24	8	I47.1	Supraventricular tachycardia	6	Y	J44.1, I50.9, F03.90, E11.9, D72.829, I47.1
0167844	262783467	2016-02-16	2016-02-24	8	I48.91	Unspecified atrial fibrillation	7	Y	J44.1, I50.9, F03.90, E11.9, D72.829, I47.1, I48.91
0167844	262783467	2016-02-16	2016-02-24	8	G62.9	Polyneuropathy, unspecified	8	Y	J44.1, I50.9, F03.90, E11.9, D72.829, I47.1, I48.91, G62.9
0167844	262783467	2016-02-16	2016-02-24	8	E78.5	Hyperlipidemia, unspecified	9	Y	J44.1, I50.9, F03.90, E11.9, D72.829, I47.1, I48.91, G62.9, E78.5
0167844	262783467	2016-02-16	2016-02-24	8	I48.92	Unspecified atrial flutter	10	Y	J44.1, I50.9, F03.90, E11.9, D72.829, I47.1, I48.91, G62.9, E78.5, I48.92
0167844	262783467	2016-02-16	2016-02-24	8	I51.7	Cardiomegaly	11	Y	J44.1, I50.9, F03.90, E11.9, D72.829, I47.1, I48.91, G62.9, E78.5, I48.92, I51.7
0167844	262783467	2016-02-16	2016-02-24	8	J40	Bronchitis, not specified as acute or chronic	12	Y	J44.1, I50.9, F03.90, E11.9, D72.829, I47.1, I48.91, G62.9, E78.5, I48.92, I51.7, J40
0167844	262783467	2016-02-16	2016-02-24	8	R59.0	Localized enlarged lymph nodes	13	Y	J44.1, I50.9, F03.90, E11.9, D72.829, I47.1, I48.91, G62.9, E78.5, I48.92, I51.7, J40, R59.0
0167844	262783467	2016-02-16	2016-02-24	8	I10	Essential (primary) hypertension	14	Y	J44.1, I50.9, F03.90, E11.9, D72.829, I47.1, I48.91, G62.9, E78.5, I48.92, I51.7, J40, R59.0, I10
0167844	262783467	2016-02-16	2016-02-24	8	T38.0X5A	Adverse effect of glucocorticoids and synthetic an	15	N	J44.1, I50.9, F03.90, E11.9, D72.829, I47.1, I48.91, G62.9, E78.5, I48.92, I51.7, J40, R59.0, I10, T38.0X5A
0167844	262783467	2016-02-16	2016-02-24	8	Y92.239	Unspecified place in hospital as the place of occu	16		J44.1, I50.9, F03.90, E11.9, D72.829, I47.1, I48.91, G62.9, E78.5, I48.92, I51.7, J40, R59.0, I10, T38.0X5A, Y92.239
0167844	262783467	2016-02-16	2016-02-24	8	F32.9	Major depressive disorder, single episode, unspeci	17	Y	J44.1, I50.9, F03.90, E11.9, D72.829, I47.1, I48.91, G62.9, E78.5, I48.92, I51.7, J40, R59.0, I10, T38.0X5A, Y92.239, F32.9
0167844	262783467	2016-02-16	2016-02-24	8	F43.10	Post-traumatic stress disorder, unspecified	18	Y	J44.1, I50.9, F03.90, E11.9, D72.829, I47.1, I48.91, G62.9, E78.5, I48.92, I51.7, J40, R59.0, I10, T38.0X5A, Y92.239, F32.9, F43.10
0167844	262783467	2016-02-16	2016-02-24	8	F17.210	Nicotine dependence, cigarettes, uncomplicated	19	Y	J44.1, I50.9, F03.90, E11.9, D72.829, I47.1, I48.91, G62.9, E78.5, I48.92, I51.7, J40, R59.0, I10, T38.0X5A, Y92.239, F32.9, F43.10, F17.210
0167844	262783467	2016-02-16	2016-02-24	8	Z86.73	Personal history of transient ischemic attack (TIA	20		J44.1, I50.9, F03.90, E11.9, D72.829, I47.1, I48.91, G62.9, E78.5, I48.92, I51.7, J40, R59.0, I10, T38.0X5A, Y92.239, F32.9, F43.10, F17.210, Z86.73	Last
0168104	259990364	2015-11-06	2015-11-11	5	T82.7XXA	Infection and inflammatory reaction due to other c	1	Y	T82.7XXA
0168104	259990364	2015-11-06	2015-11-11	5	A41.9	Sepsis, unspecified organism	2	Y	T82.7XXA, A41.9
0168104	259990364	2015-11-06	2015-11-11	5	N18.6	End stage renal disease	3	Y	T82.7XXA, A41.9, N18.6
0168104	259990364	2015-11-06	2015-11-11	5	R65.21	Severe sepsis with septic shock	4	Y	T82.7XXA, A41.9, N18.6, R65.21
0168104	259990364	2015-11-06	2015-11-11	5	J96.01	Acute respiratory failure with hypoxia	5	Y	T82.7XXA, A41.9, N18.6, R65.21, J96.01
0168104	259990364	2015-11-06	2015-11-11	5	E10.40	Type 1 diabetes mellitus with diabetic neuropathy,	6	Y	T82.7XXA, A41.9, N18.6, R65.21, J96.01, E10.40
0168104	259990364	2015-11-06	2015-11-11	5	I12.0	Hypertensive chronic kidney disease with stage 5 c	7	Y	T82.7XXA, A41.9, N18.6, R65.21, J96.01, E10.40, I12.0
0168104	259990364	2015-11-06	2015-11-11	5	E10.319	Type 1 diabetes mellitus with unspecified diabetic	8	Y	T82.7XXA, A41.9, N18.6, R65.21, J96.01, E10.40, I12.0, E10.319
0168104	259990364	2015-11-06	2015-11-11	5	I25.10	Atherosclerotic heart disease of native coronary a	9	Y	T82.7XXA, A41.9, N18.6, R65.21, J96.01, E10.40, I12.0, E10.319, I25.10
0168104	259990364	2015-11-06	2015-11-11	5	E78.5	Hyperlipidemia, unspecified	10	Y	T82.7XXA, A41.9, N18.6, R65.21, J96.01, E10.40, I12.0, E10.319, I25.10, E78.5
0168104	259990364	2015-11-06	2015-11-11	5	R19.7	Diarrhea, unspecified	11	Y	T82.7XXA, A41.9, N18.6, R65.21, J96.01, E10.40, I12.0, E10.319, I25.10, E78.5, R19.7
0168104	259990364	2015-11-06	2015-11-11	5	Z79.4	Long term (current) use of insulin	12		T82.7XXA, A41.9, N18.6, R65.21, J96.01, E10.40, I12.0, E10.319, I25.10, E78.5, R19.7, Z79.4
0168104	259990364	2015-11-06	2015-11-11	5	Z86.718	Personal history of other venous thrombosis and em	13		T82.7XXA, A41.9, N18.6, R65.21, J96.01, E10.40, I12.0, E10.319, I25.10, E78.5, R19.7, Z79.4, Z86.718
0168104	259990364	2015-11-06	2015-11-11	5	Z87.891	Personal history of nicotine dependence	14		T82.7XXA, A41.9, N18.6, R65.21, J96.01, E10.40, I12.0, E10.319, I25.10, E78.5, R19.7, Z79.4, Z86.718, Z87.891
0168104	259990364	2015-11-06	2015-11-11	5	Z88.6	Allergy status to analgesic agent status	15		T82.7XXA, A41.9, N18.6, R65.21, J96.01, E10.40, I12.0, E10.319, I25.10, E78.5, R19.7, Z79.4, Z86.718, Z87.891, Z88.6
0168104	259990364	2015-11-06	2015-11-11	5	Z79.82	Long term (current) use of aspirin	16		T82.7XXA, A41.9, N18.6, R65.21, J96.01, E10.40, I12.0, E10.319, I25.10, E78.5, R19.7, Z79.4, Z86.718, Z87.891, Z88.6, Z79.82	Last
0172650	261685630	2016-01-09	2016-01-20	11	J69.0	Pneumonitis due to inhalation of food and vomit	1	Y	J69.0
0172650	261685630	2016-01-09	2016-01-20	11	J96.21	Acute and chronic respiratory failure with hypoxia	2	Y	J69.0, J96.21
0172650	261685630	2016-01-09	2016-01-20	11	N17.9	Acute kidney failure, unspecified	3	Y	J69.0, J96.21, N17.9
0172650	261685630	2016-01-09	2016-01-20	11	E87.0	Hyperosmolality and hypernatremia	4	Y	J69.0, J96.21, N17.9, E87.0
0172650	261685630	2016-01-09	2016-01-20	11	R64	Cachexia	5	Y	J69.0, J96.21, N17.9, E87.0, R64
0172650	261685630	2016-01-09	2016-01-20	11	I69.354	Hemiplegia and hemiparesis following cerebral infa	6		J69.0, J96.21, N17.9, E87.0, R64, I69.354
0172650	261685630	2016-01-09	2016-01-20	11	R13.10	Dysphagia, unspecified	7	Y	J69.0, J96.21, N17.9, E87.0, R64, I69.354, R13.10
0172650	261685630	2016-01-09	2016-01-20	11	J90	Pleural effusion, not elsewhere classified	8	Y	J69.0, J96.21, N17.9, E87.0, R64, I69.354, R13.10, J90
0172650	261685630	2016-01-09	2016-01-20	11	I50.32	Chronic diastolic (congestive) heart failure	9	Y	J69.0, J96.21, N17.9, E87.0, R64, I69.354, R13.10, J90, I50.32
0172650	261685630	2016-01-09	2016-01-20	11	J95.812	Postprocedural air leak	10	N	J69.0, J96.21, N17.9, E87.0, R64, I69.354, R13.10, J90, I50.32, J95.812
0172650	261685630	2016-01-09	2016-01-20	11	E46	Unspecified protein-calorie malnutrition	11	Y	J69.0, J96.21, N17.9, E87.0, R64, I69.354, R13.10, J90, I50.32, J95.812, E46
0172650	261685630	2016-01-09	2016-01-20	11	Z68.1	Body mass index (BMI) 19 or less, adult	12		J69.0, J96.21, N17.9, E87.0, R64, I69.354, R13.10, J90, I50.32, J95.812, E46, Z68.1
0172650	261685630	2016-01-09	2016-01-20	11	J44.9	Chronic obstructive pulmonary disease, unspecified	13	Y	J69.0, J96.21, N17.9, E87.0, R64, I69.354, R13.10, J90, I50.32, J95.812, E46, Z68.1, J44.9
0172650	261685630	2016-01-09	2016-01-20	11	J45.909	Unspecified asthma, uncomplicated	14	Y	J69.0, J96.21, N17.9, E87.0, R64, I69.354, R13.10, J90, I50.32, J95.812, E46, Z68.1, J44.9, J45.909
0172650	261685630	2016-01-09	2016-01-20	11	I12.9	Hypertensive chronic kidney disease with stage 1 t	15	Y	J69.0, J96.21, N17.9, E87.0, R64, I69.354, R13.10, J90, I50.32, J95.812, E46, Z68.1, J44.9, J45.909, I12.9
0172650	261685630	2016-01-09	2016-01-20	11	I69.391	Dysphagia following cerebral infarction	16		J69.0, J96.21, N17.9, E87.0, R64, I69.354, R13.10, J90, I50.32, J95.812, E46, Z68.1, J44.9, J45.909, I12.9, I69.391
0172650	261685630	2016-01-09	2016-01-20	11	I69.398	Other sequelae of cerebral infarction	17		J69.0, J96.21, N17.9, E87.0, R64, I69.354, R13.10, J90, I50.32, J95.812, E46, Z68.1, J44.9, J45.909, I12.9, I69.391, I69.398
0172650	261685630	2016-01-09	2016-01-20	11	N18.3	Chronic kidney disease, stage 3 (moderate)	18	Y	J69.0, J96.21, N17.9, E87.0, R64, I69.354, R13.10, J90, I50.32, J95.812, E46, Z68.1, J44.9, J45.909, I12.9, I69.391, I69.398, N18.3
0172650	261685630	2016-01-09	2016-01-20	11	Z66	Do not resuscitate	19	Y	J69.0, J96.21, N17.9, E87.0, R64, I69.354, R13.10, J90, I50.32, J95.812, E46, Z68.1, J44.9, J45.909, I12.9, I69.391, I69.398, N18.3, Z66	Last
0174709	261735112	2016-01-11	2016-01-14	3	J44.1	Chronic obstructive pulmonary disease with (acute)	1	Y	J44.1
0174709	261735112	2016-01-11	2016-01-14	3	Q31.3	Laryngocele	2		J44.1, Q31.3
0174709	261735112	2016-01-11	2016-01-14	3	I10	Essential (primary) hypertension	3	Y	J44.1, Q31.3, I10
0174709	261735112	2016-01-11	2016-01-14	3	E78.5	Hyperlipidemia, unspecified	4	Y	J44.1, Q31.3, I10, E78.5
0174709	261735112	2016-01-11	2016-01-14	3	G89.29	Other chronic pain	5	Y	J44.1, Q31.3, I10, E78.5, G89.29
0174709	261735112	2016-01-11	2016-01-14	3	M54.9	Dorsalgia, unspecified	6	Y	J44.1, Q31.3, I10, E78.5, G89.29, M54.9
0174709	261735112	2016-01-11	2016-01-14	3	K21.9	Gastro-esophageal reflux disease without esophagit	7	Y	J44.1, Q31.3, I10, E78.5, G89.29, M54.9, K21.9
0174709	261735112	2016-01-11	2016-01-14	3	F32.9	Major depressive disorder, single episode, unspeci	8	Y	J44.1, Q31.3, I10, E78.5, G89.29, M54.9, K21.9, F32.9
0174709	261735112	2016-01-11	2016-01-14	3	H40.9	Unspecified glaucoma	9	Y	J44.1, Q31.3, I10, E78.5, G89.29, M54.9, K21.9, F32.9, H40.9
0174709	261735112	2016-01-11	2016-01-14	3	K14.9	Disease of tongue, unspecified	10	Y	J44.1, Q31.3, I10, E78.5, G89.29, M54.9, K21.9, F32.9, H40.9, K14.9
0174709	261735112	2016-01-11	2016-01-14	3	F17.200	Nicotine dependence, unspecified, uncomplicated	11	Y	J44.1, Q31.3, I10, E78.5, G89.29, M54.9, K21.9, F32.9, H40.9, K14.9, F17.200
0174709	261735112	2016-01-11	2016-01-14	3	J38.3	Other diseases of vocal cords	12	Y	J44.1, Q31.3, I10, E78.5, G89.29, M54.9, K21.9, F32.9, H40.9, K14.9, F17.200, J38.3
0174709	261735112	2016-01-11	2016-01-14	3	Z88.0	Allergy status to penicillin	13		J44.1, Q31.3, I10, E78.5, G89.29, M54.9, K21.9, F32.9, H40.9, K14.9, F17.200, J38.3, Z88.0
0174709	261735112	2016-01-11	2016-01-14	3	Z88.1	Allergy status to other antibiotic agents status	14		J44.1, Q31.3, I10, E78.5, G89.29, M54.9, K21.9, F32.9, H40.9, K14.9, F17.200, J38.3, Z88.0, Z88.1
0174709	261735112	2016-01-11	2016-01-14	3	Z88.6	Allergy status to analgesic agent status	15		J44.1, Q31.3, I10, E78.5, G89.29, M54.9, K21.9, F32.9, H40.9, K14.9, F17.200, J38.3, Z88.0, Z88.1, Z88.6	Last
0174951	259056992	2015-10-06	2015-10-09	3	I95.3	Hypotension of hemodialysis	1	Y	I95.3
0174951	259056992	2015-10-06	2015-10-09	3	R65.20	Severe sepsis without septic shock	2	Y	I95.3, R65.20
0174951	259056992	2015-10-06	2015-10-09	3	N18.6	End stage renal disease	3	Y	I95.3, R65.20, N18.6
0174951	259056992	2015-10-06	2015-10-09	3	K76.6	Portal hypertension	4	Y	I95.3, R65.20, N18.6, K76.6
0174951	259056992	2015-10-06	2015-10-09	3	A41.9	Sepsis, unspecified organism	5	Y	I95.3, R65.20, N18.6, K76.6, A41.9
0174951	259056992	2015-10-06	2015-10-09	3	I12.0	Hypertensive chronic kidney disease with stage 5 c	6	Y	I95.3, R65.20, N18.6, K76.6, A41.9, I12.0
0174951	259056992	2015-10-06	2015-10-09	3	E83.51	Hypocalcemia	7	Y	I95.3, R65.20, N18.6, K76.6, A41.9, I12.0, E83.51
0174951	259056992	2015-10-06	2015-10-09	3	J44.9	Chronic obstructive pulmonary disease, unspecified	8	Y	I95.3, R65.20, N18.6, K76.6, A41.9, I12.0, E83.51, J44.9
0174951	259056992	2015-10-06	2015-10-09	3	F10.21	Alcohol dependence, in remission	9	Y	I95.3, R65.20, N18.6, K76.6, A41.9, I12.0, E83.51, J44.9, F10.21
0174951	259056992	2015-10-06	2015-10-09	3	D50.9	Iron deficiency anemia, unspecified	10	Y	I95.3, R65.20, N18.6, K76.6, A41.9, I12.0, E83.51, J44.9, F10.21, D50.9
0174951	259056992	2015-10-06	2015-10-09	3	I95.9	Hypotension, unspecified	11	Y	I95.3, R65.20, N18.6, K76.6, A41.9, I12.0, E83.51, J44.9, F10.21, D50.9, I95.9
0174951	259056992	2015-10-06	2015-10-09	3	D63.1	Anemia in chronic kidney disease	12	Y	I95.3, R65.20, N18.6, K76.6, A41.9, I12.0, E83.51, J44.9, F10.21, D50.9, I95.9, D63.1
0174951	259056992	2015-10-06	2015-10-09	3	B18.2	Chronic viral hepatitis C	13	Y	I95.3, R65.20, N18.6, K76.6, A41.9, I12.0, E83.51, J44.9, F10.21, D50.9, I95.9, D63.1, B18.2
0174951	259056992	2015-10-06	2015-10-09	3	K21.9	Gastro-esophageal reflux disease without esophagit	14	Y	I95.3, R65.20, N18.6, K76.6, A41.9, I12.0, E83.51, J44.9, F10.21, D50.9, I95.9, D63.1, B18.2, K21.9
0174951	259056992	2015-10-06	2015-10-09	3	Z99.2	Dependence on renal dialysis	15		I95.3, R65.20, N18.6, K76.6, A41.9, I12.0, E83.51, J44.9, F10.21, D50.9, I95.9, D63.1, B18.2, K21.9, Z99.2	Last
0175829	260426937	2015-11-22	2015-11-25	3	L02.414	Cutaneous abscess of left upper limb	1	Y	L02.414
0175829	260426937	2015-11-22	2015-11-25	3	L03.114	Cellulitis of left upper limb	2	Y	L02.414, L03.114
0175829	260426937	2015-11-22	2015-11-25	3	B95.62	Methicillin resistant Staphylococcus aureus infect	3	Y	L02.414, L03.114, B95.62
0175829	260426937	2015-11-22	2015-11-25	3	F17.210	Nicotine dependence, cigarettes, uncomplicated	4	Y	L02.414, L03.114, B95.62, F17.210	Last
0181465	259524932	2015-10-21	2015-10-26	5	I50.33	Acute on chronic diastolic (congestive) heart fail	1	Y	I50.33
0181465	259524932	2015-10-21	2015-10-26	5	J96.00	Acute respiratory failure, unspecified whether wit	2	Y	I50.33, J96.00
0181465	259524932	2015-10-21	2015-10-26	5	N17.9	Acute kidney failure, unspecified	3	Y	I50.33, J96.00, N17.9
0181465	259524932	2015-10-21	2015-10-26	5	J90	Pleural effusion, not elsewhere classified	4	Y	I50.33, J96.00, N17.9, J90
0181465	259524932	2015-10-21	2015-10-26	5	D69.6	Thrombocytopenia, unspecified	5	Y	I50.33, J96.00, N17.9, J90, D69.6
0181465	259524932	2015-10-21	2015-10-26	5	L97.909	Non-pressure chronic ulcer of unspecified part of	6	Y	I50.33, J96.00, N17.9, J90, D69.6, L97.909
0181465	259524932	2015-10-21	2015-10-26	5	N39.0	Urinary tract infection, site not specified	7	Y	I50.33, J96.00, N17.9, J90, D69.6, L97.909, N39.0
0181465	259524932	2015-10-21	2015-10-26	5	E87.5	Hyperkalemia	8	Y	I50.33, J96.00, N17.9, J90, D69.6, L97.909, N39.0, E87.5
0181465	259524932	2015-10-21	2015-10-26	5	I48.0	Paroxysmal atrial fibrillation	9	Y	I50.33, J96.00, N17.9, J90, D69.6, L97.909, N39.0, E87.5, I48.0
0181465	259524932	2015-10-21	2015-10-26	5	R09.89	Other specified symptoms and signs involving the c	10	Y	I50.33, J96.00, N17.9, J90, D69.6, L97.909, N39.0, E87.5, I48.0, R09.89
0181465	259524932	2015-10-21	2015-10-26	5	L03.90	Cellulitis, unspecified	11	Y	I50.33, J96.00, N17.9, J90, D69.6, L97.909, N39.0, E87.5, I48.0, R09.89, L03.90
0181465	259524932	2015-10-21	2015-10-26	5	K21.9	Gastro-esophageal reflux disease without esophagit	12	Y	I50.33, J96.00, N17.9, J90, D69.6, L97.909, N39.0, E87.5, I48.0, R09.89, L03.90, K21.9
0181465	259524932	2015-10-21	2015-10-26	5	I10	Essential (primary) hypertension	13	Y	I50.33, J96.00, N17.9, J90, D69.6, L97.909, N39.0, E87.5, I48.0, R09.89, L03.90, K21.9, I10
0181465	259524932	2015-10-21	2015-10-26	5	M19.90	Unspecified osteoarthritis, unspecified site	14	Y	I50.33, J96.00, N17.9, J90, D69.6, L97.909, N39.0, E87.5, I48.0, R09.89, L03.90, K21.9, I10, M19.90
0181465	259524932	2015-10-21	2015-10-26	5	I87.8	Other specified disorders of veins	15	Y	I50.33, J96.00, N17.9, J90, D69.6, L97.909, N39.0, E87.5, I48.0, R09.89, L03.90, K21.9, I10, M19.90, I87.8
0181465	259524932	2015-10-21	2015-10-26	5	B96.1	Klebsiella pneumoniae K. pneumoniae as the cause o	16	Y	I50.33, J96.00, N17.9, J90, D69.6, L97.909, N39.0, E87.5, I48.0, R09.89, L03.90, K21.9, I10, M19.90, I87.8, B96.1
0181465	259524932	2015-10-21	2015-10-26	5	I87.2	Venous insufficiency (chronic) (peripheral)	17	Y	I50.33, J96.00, N17.9, J90, D69.6, L97.909, N39.0, E87.5, I48.0, R09.89, L03.90, K21.9, I10, M19.90, I87.8, B96.1, I87.2
0181465	259524932	2015-10-21	2015-10-26	5	I51.7	Cardiomegaly	18	Y	I50.33, J96.00, N17.9, J90, D69.6, L97.909, N39.0, E87.5, I48.0, R09.89, L03.90, K21.9, I10, M19.90, I87.8, B96.1, I87.2, I51.7
0181465	259524932	2015-10-21	2015-10-26	5	Z88.6	Allergy status to analgesic agent status	19		I50.33, J96.00, N17.9, J90, D69.6, L97.909, N39.0, E87.5, I48.0, R09.89, L03.90, K21.9, I10, M19.90, I87.8, B96.1, I87.2, I51.7, Z88.6
0181465	259524932	2015-10-21	2015-10-26	5	Z88.8	Allergy status to other drugs, medicaments and bio	20		I50.33, J96.00, N17.9, J90, D69.6, L97.909, N39.0, E87.5, I48.0, R09.89, L03.90, K21.9, I10, M19.90, I87.8, B96.1, I87.2, I51.7, Z88.6, Z88.8
0181465	259524932	2015-10-21	2015-10-26	5	Z79.899	Other long term (current) drug therapy	21		I50.33, J96.00, N17.9, J90, D69.6, L97.909, N39.0, E87.5, I48.0, R09.89, L03.90, K21.9, I10, M19.90, I87.8, B96.1, I87.2, I51.7, Z88.6, Z88.8, Z79.899
0181465	259524932	2015-10-21	2015-10-26	5	Z79.82	Long term (current) use of aspirin	22		I50.33, J96.00, N17.9, J90, D69.6, L97.909, N39.0, E87.5, I48.0, R09.89, L03.90, K21.9, I10, M19.90, I87.8, B96.1, I87.2, I51.7, Z88.6, Z88.8, Z79.899, Z79.82
0181465	259524932	2015-10-21	2015-10-26	5	Z79.01	Long term (current) use of anticoagulants	23		I50.33, J96.00, N17.9, J90, D69.6, L97.909, N39.0, E87.5, I48.0, R09.89, L03.90, K21.9, I10, M19.90, I87.8, B96.1, I87.2, I51.7, Z88.6, Z88.8, Z79.899, Z79.82, Z79.01	Last
0185586	262710775	2016-02-15	2016-03-06	20	A41.9	Sepsis, unspecified organism	1	Y	A41.9
0185586	262710775	2016-02-15	2016-03-06	20	J96.01	Acute respiratory failure with hypoxia	2	Y	A41.9, J96.01
0185586	262710775	2016-02-15	2016-03-06	20	E87.2	Acidosis	3	N	A41.9, J96.01, E87.2
0185586	262710775	2016-02-15	2016-03-06	20	J18.9	Pneumonia, unspecified organism	4	Y	A41.9, J96.01, E87.2, J18.9
0185586	262710775	2016-02-15	2016-03-06	20	J80	Acute respiratory distress syndrome	5	Y	A41.9, J96.01, E87.2, J18.9, J80
0185586	262710775	2016-02-15	2016-03-06	20	J38.4	Edema of larynx	6	N	A41.9, J96.01, E87.2, J18.9, J80, J38.4
0185586	262710775	2016-02-15	2016-03-06	20	Z99.81	Dependence on supplemental oxygen	7		A41.9, J96.01, E87.2, J18.9, J80, J38.4, Z99.81
0185586	262710775	2016-02-15	2016-03-06	20	F13.239	Sedative, hypnotic or anxiolytic dependence with w	8	N	A41.9, J96.01, E87.2, J18.9, J80, J38.4, Z99.81, F13.239
0185586	262710775	2016-02-15	2016-03-06	20	R65.20	Severe sepsis without septic shock	9	Y	A41.9, J96.01, E87.2, J18.9, J80, J38.4, Z99.81, F13.239, R65.20
0185586	262710775	2016-02-15	2016-03-06	20	E83.42	Hypomagnesemia	10	Y	A41.9, J96.01, E87.2, J18.9, J80, J38.4, Z99.81, F13.239, R65.20, E83.42
0185586	262710775	2016-02-15	2016-03-06	20	E87.70	Fluid overload, unspecified	11	Y	A41.9, J96.01, E87.2, J18.9, J80, J38.4, Z99.81, F13.239, R65.20, E83.42, E87.70
0185586	262710775	2016-02-15	2016-03-06	20	J44.9	Chronic obstructive pulmonary disease, unspecified	12	Y	A41.9, J96.01, E87.2, J18.9, J80, J38.4, Z99.81, F13.239, R65.20, E83.42, E87.70, J44.9
0185586	262710775	2016-02-15	2016-03-06	20	E87.6	Hypokalemia	13	Y	A41.9, J96.01, E87.2, J18.9, J80, J38.4, Z99.81, F13.239, R65.20, E83.42, E87.70, J44.9, E87.6
0185586	262710775	2016-02-15	2016-03-06	20	G47.33	Obstructive sleep apnea (adult) (pediatric)	14	Y	A41.9, J96.01, E87.2, J18.9, J80, J38.4, Z99.81, F13.239, R65.20, E83.42, E87.70, J44.9, E87.6, G47.33
0185586	262710775	2016-02-15	2016-03-06	20	N18.2	Chronic kidney disease, stage 2 (mild)	15	Y	A41.9, J96.01, E87.2, J18.9, J80, J38.4, Z99.81, F13.239, R65.20, E83.42, E87.70, J44.9, E87.6, G47.33, N18.2
0185586	262710775	2016-02-15	2016-03-06	20	I12.9	Hypertensive chronic kidney disease with stage 1 t	16	Y	A41.9, J96.01, E87.2, J18.9, J80, J38.4, Z99.81, F13.239, R65.20, E83.42, E87.70, J44.9, E87.6, G47.33, N18.2, I12.9
0185586	262710775	2016-02-15	2016-03-06	20	F17.210	Nicotine dependence, cigarettes, uncomplicated	17	Y	A41.9, J96.01, E87.2, J18.9, J80, J38.4, Z99.81, F13.239, R65.20, E83.42, E87.70, J44.9, E87.6, G47.33, N18.2, I12.9, F17.210	Last
0187652	263239139	2016-03-02	2016-03-09	7	A41.9	Sepsis, unspecified organism	1	Y	A41.9
0187652	263239139	2016-03-02	2016-03-09	7	J96.01	Acute respiratory failure with hypoxia	2	Y	A41.9, J96.01
0187652	263239139	2016-03-02	2016-03-09	7	R65.21	Severe sepsis with septic shock	3	Y	A41.9, J96.01, R65.21
0187652	263239139	2016-03-02	2016-03-09	7	N17.9	Acute kidney failure, unspecified	4	Y	A41.9, J96.01, R65.21, N17.9
0187652	263239139	2016-03-02	2016-03-09	7	J18.9	Pneumonia, unspecified organism	5	Y	A41.9, J96.01, R65.21, N17.9, J18.9
0187652	263239139	2016-03-02	2016-03-09	7	E87.2	Acidosis	6	Y	A41.9, J96.01, R65.21, N17.9, J18.9, E87.2
0187652	263239139	2016-03-02	2016-03-09	7	D69.6	Thrombocytopenia, unspecified	7	Y	A41.9, J96.01, R65.21, N17.9, J18.9, E87.2, D69.6
0187652	263239139	2016-03-02	2016-03-09	7	N39.0	Urinary tract infection, site not specified	8	Y	A41.9, J96.01, R65.21, N17.9, J18.9, E87.2, D69.6, N39.0
0187652	263239139	2016-03-02	2016-03-09	7	Z99.81	Dependence on supplemental oxygen	9		A41.9, J96.01, R65.21, N17.9, J18.9, E87.2, D69.6, N39.0, Z99.81
0187652	263239139	2016-03-02	2016-03-09	7	J44.9	Chronic obstructive pulmonary disease, unspecified	10	Y	A41.9, J96.01, R65.21, N17.9, J18.9, E87.2, D69.6, N39.0, Z99.81, J44.9
0187652	263239139	2016-03-02	2016-03-09	7	E87.6	Hypokalemia	11	N	A41.9, J96.01, R65.21, N17.9, J18.9, E87.2, D69.6, N39.0, Z99.81, J44.9, E87.6
0187652	263239139	2016-03-02	2016-03-09	7	E78.5	Hyperlipidemia, unspecified	12	Y	A41.9, J96.01, R65.21, N17.9, J18.9, E87.2, D69.6, N39.0, Z99.81, J44.9, E87.6, E78.5
0187652	263239139	2016-03-02	2016-03-09	7	Y95	Nosocomial condition	13	Y	A41.9, J96.01, R65.21, N17.9, J18.9, E87.2, D69.6, N39.0, Z99.81, J44.9, E87.6, E78.5, Y95
0187652	263239139	2016-03-02	2016-03-09	7	E03.9	Hypothyroidism, unspecified	14	Y	A41.9, J96.01, R65.21, N17.9, J18.9, E87.2, D69.6, N39.0, Z99.81, J44.9, E87.6, E78.5, Y95, E03.9
0187652	263239139	2016-03-02	2016-03-09	7	I10	Essential (primary) hypertension	15	Y	A41.9, J96.01, R65.21, N17.9, J18.9, E87.2, D69.6, N39.0, Z99.81, J44.9, E87.6, E78.5, Y95, E03.9, I10
0187652	263239139	2016-03-02	2016-03-09	7	I73.9	Peripheral vascular disease, unspecified	16	Y	A41.9, J96.01, R65.21, N17.9, J18.9, E87.2, D69.6, N39.0, Z99.81, J44.9, E87.6, E78.5, Y95, E03.9, I10, I73.9
0187652	263239139	2016-03-02	2016-03-09	7	Z66	Do not resuscitate	17	N	A41.9, J96.01, R65.21, N17.9, J18.9, E87.2, D69.6, N39.0, Z99.81, J44.9, E87.6, E78.5, Y95, E03.9, I10, I73.9, Z66
0187652	263239139	2016-03-02	2016-03-09	7	F17.210	Nicotine dependence, cigarettes, uncomplicated	18	Y	A41.9, J96.01, R65.21, N17.9, J18.9, E87.2, D69.6, N39.0, Z99.81, J44.9, E87.6, E78.5, Y95, E03.9, I10, I73.9, Z66, F17.210	Last
0190013	261182026	2015-12-20	2015-12-24	4	I97.618	Postprocedural hemorrhage and hematoma of a circul	1	Y	I97.618
0190013	261182026	2015-12-20	2015-12-24	4	T81.32XA	Disruption of internal operation (surgical) wound,	2	Y	I97.618, T81.32XA
0190013	261182026	2015-12-20	2015-12-24	4	I42.9	Cardiomyopathy, unspecified	3	Y	I97.618, T81.32XA, I42.9
0190013	261182026	2015-12-20	2015-12-24	4	I50.42	Chronic combined systolic (congestive) and diastol	4	Y	I97.618, T81.32XA, I42.9, I50.42
0190013	261182026	2015-12-20	2015-12-24	4	N39.0	Urinary tract infection, site not specified	5	N	I97.618, T81.32XA, I42.9, I50.42, N39.0
0190013	261182026	2015-12-20	2015-12-24	4	I48.2	Chronic atrial fibrillation	6	Y	I97.618, T81.32XA, I42.9, I50.42, N39.0, I48.2
0190013	261182026	2015-12-20	2015-12-24	4	G62.9	Polyneuropathy, unspecified	7	Y	I97.618, T81.32XA, I42.9, I50.42, N39.0, I48.2, G62.9
0190013	261182026	2015-12-20	2015-12-24	4	D62	Acute posthemorrhagic anemia	8	Y	I97.618, T81.32XA, I42.9, I50.42, N39.0, I48.2, G62.9, D62
0190013	261182026	2015-12-20	2015-12-24	4	R55	Syncope and collapse	9	Y	I97.618, T81.32XA, I42.9, I50.42, N39.0, I48.2, G62.9, D62, R55
0190013	261182026	2015-12-20	2015-12-24	4	I10	Essential (primary) hypertension	10	Y	I97.618, T81.32XA, I42.9, I50.42, N39.0, I48.2, G62.9, D62, R55, I10
0190013	261182026	2015-12-20	2015-12-24	4	Z95.810	Presence of automatic (implantable) cardiac defibr	11		I97.618, T81.32XA, I42.9, I50.42, N39.0, I48.2, G62.9, D62, R55, I10, Z95.810
0190013	261182026	2015-12-20	2015-12-24	4	I77.819	Aortic ectasia, unspecified site	12	Y	I97.618, T81.32XA, I42.9, I50.42, N39.0, I48.2, G62.9, D62, R55, I10, Z95.810, I77.819
0190013	261182026	2015-12-20	2015-12-24	4	I95.1	Orthostatic hypotension	13	Y	I97.618, T81.32XA, I42.9, I50.42, N39.0, I48.2, G62.9, D62, R55, I10, Z95.810, I77.819, I95.1
0190013	261182026	2015-12-20	2015-12-24	4	N40.0	Enlarged prostate without lower urinary tract symp	14	Y	I97.618, T81.32XA, I42.9, I50.42, N39.0, I48.2, G62.9, D62, R55, I10, Z95.810, I77.819, I95.1, N40.0
0190013	261182026	2015-12-20	2015-12-24	4	Z87.891	Personal history of nicotine dependence	15		I97.618, T81.32XA, I42.9, I50.42, N39.0, I48.2, G62.9, D62, R55, I10, Z95.810, I77.819, I95.1, N40.0, Z87.891
0190013	261182026	2015-12-20	2015-12-24	4	I71.4	Abdominal aortic aneurysm, without rupture	16	Y	I97.618, T81.32XA, I42.9, I50.42, N39.0, I48.2, G62.9, D62, R55, I10, Z95.810, I77.819, I95.1, N40.0, Z87.891, I71.4
0190013	261182026	2015-12-20	2015-12-24	4	W18.39XA	Other fall on same level, initial encounter	17	Y	I97.618, T81.32XA, I42.9, I50.42, N39.0, I48.2, G62.9, D62, R55, I10, Z95.810, I77.819, I95.1, N40.0, Z87.891, I71.4, W18.39XA
0190013	261182026	2015-12-20	2015-12-24	4	Y92.018	Other place in single-family (private) house as th	18		I97.618, T81.32XA, I42.9, I50.42, N39.0, I48.2, G62.9, D62, R55, I10, Z95.810, I77.819, I95.1, N40.0, Z87.891, I71.4, W18.39XA, Y92.018
0190013	261182026	2015-12-20	2015-12-24	4	R53.1	Weakness	19	Y	I97.618, T81.32XA, I42.9, I50.42, N39.0, I48.2, G62.9, D62, R55, I10, Z95.810, I77.819, I95.1, N40.0, Z87.891, I71.4, W18.39XA, Y92.018, R53.1
0190013	261182026	2015-12-20	2015-12-24	4	R42	Dizziness and giddiness	20	Y	I97.618, T81.32XA, I42.9, I50.42, N39.0, I48.2, G62.9, D62, R55, I10, Z95.810, I77.819, I95.1, N40.0, Z87.891, I71.4, W18.39XA, Y92.018, R53.1, R42
0190013	261182026	2015-12-20	2015-12-24	4	B96.20	Unspecified Escherichia coli E. coli as the cause	21	N	I97.618, T81.32XA, I42.9, I50.42, N39.0, I48.2, G62.9, D62, R55, I10, Z95.810, I77.819, I95.1, N40.0, Z87.891, I71.4, W18.39XA, Y92.018, R53.1, R42, B96.20	Last
0192070	259368264	2015-10-15	2015-10-22	7	Q27.33	Arteriovenous malformation of digestive system ves	1		Q27.33
0192070	259368264	2015-10-15	2015-10-22	7	E87.2	Acidosis	2	Y	Q27.33, E87.2
0192070	259368264	2015-10-15	2015-10-22	7	I42.9	Cardiomyopathy, unspecified	3	Y	Q27.33, E87.2, I42.9
0192070	259368264	2015-10-15	2015-10-22	7	I50.32	Chronic diastolic (congestive) heart failure	4	Y	Q27.33, E87.2, I42.9, I50.32
0192070	259368264	2015-10-15	2015-10-22	7	D62	Acute posthemorrhagic anemia	5	Y	Q27.33, E87.2, I42.9, I50.32, D62
0192070	259368264	2015-10-15	2015-10-22	7	K62.6	Ulcer of anus and rectum	6	Y	Q27.33, E87.2, I42.9, I50.32, D62, K62.6
0192070	259368264	2015-10-15	2015-10-22	7	K92.1	Melena	7	Y	Q27.33, E87.2, I42.9, I50.32, D62, K62.6, K92.1
0192070	259368264	2015-10-15	2015-10-22	7	E83.42	Hypomagnesemia	8	Y	Q27.33, E87.2, I42.9, I50.32, D62, K62.6, K92.1, E83.42
0192070	259368264	2015-10-15	2015-10-22	7	F03.90	Unspecified dementia without behavioral disturbanc	9	Y	Q27.33, E87.2, I42.9, I50.32, D62, K62.6, K92.1, E83.42, F03.90
0192070	259368264	2015-10-15	2015-10-22	7	I48.2	Chronic atrial fibrillation	10	Y	Q27.33, E87.2, I42.9, I50.32, D62, K62.6, K92.1, E83.42, F03.90, I48.2
0192070	259368264	2015-10-15	2015-10-22	7	I48.91	Unspecified atrial fibrillation	11	Y	Q27.33, E87.2, I42.9, I50.32, D62, K62.6, K92.1, E83.42, F03.90, I48.2, I48.91
0192070	259368264	2015-10-15	2015-10-22	7	Z66	Do not resuscitate	12	Y	Q27.33, E87.2, I42.9, I50.32, D62, K62.6, K92.1, E83.42, F03.90, I48.2, I48.91, Z66
0192070	259368264	2015-10-15	2015-10-22	7	I10	Essential (primary) hypertension	13	Y	Q27.33, E87.2, I42.9, I50.32, D62, K62.6, K92.1, E83.42, F03.90, I48.2, I48.91, Z66, I10
0192070	259368264	2015-10-15	2015-10-22	7	E78.5	Hyperlipidemia, unspecified	14	Y	Q27.33, E87.2, I42.9, I50.32, D62, K62.6, K92.1, E83.42, F03.90, I48.2, I48.91, Z66, I10, E78.5
0192070	259368264	2015-10-15	2015-10-22	7	I25.10	Atherosclerotic heart disease of native coronary a	15	Y	Q27.33, E87.2, I42.9, I50.32, D62, K62.6, K92.1, E83.42, F03.90, I48.2, I48.91, Z66, I10, E78.5, I25.10
0192070	259368264	2015-10-15	2015-10-22	7	Z95.5	Presence of coronary angioplasty implant and graft	16		Q27.33, E87.2, I42.9, I50.32, D62, K62.6, K92.1, E83.42, F03.90, I48.2, I48.91, Z66, I10, E78.5, I25.10, Z95.5
0192070	259368264	2015-10-15	2015-10-22	7	D50.0	Iron deficiency anemia secondary to blood loss (ch	17	Y	Q27.33, E87.2, I42.9, I50.32, D62, K62.6, K92.1, E83.42, F03.90, I48.2, I48.91, Z66, I10, E78.5, I25.10, Z95.5, D50.0
0192070	259368264	2015-10-15	2015-10-22	7	Z86.718	Personal history of other venous thrombosis and em	18		Q27.33, E87.2, I42.9, I50.32, D62, K62.6, K92.1, E83.42, F03.90, I48.2, I48.91, Z66, I10, E78.5, I25.10, Z95.5, D50.0, Z86.718
0192070	259368264	2015-10-15	2015-10-22	7	N18.3	Chronic kidney disease, stage 3 (moderate)	19	Y	Q27.33, E87.2, I42.9, I50.32, D62, K62.6, K92.1, E83.42, F03.90, I48.2, I48.91, Z66, I10, E78.5, I25.10, Z95.5, D50.0, Z86.718, N18.3
0192070	259368264	2015-10-15	2015-10-22	7	I12.9	Hypertensive chronic kidney disease with stage 1 t	20	Y	Q27.33, E87.2, I42.9, I50.32, D62, K62.6, K92.1, E83.42, F03.90, I48.2, I48.91, Z66, I10, E78.5, I25.10, Z95.5, D50.0, Z86.718, N18.3, I12.9
0192070	259368264	2015-10-15	2015-10-22	7	K57.30	Diverticulosis of large intestine without perforat	21	Y	Q27.33, E87.2, I42.9, I50.32, D62, K62.6, K92.1, E83.42, F03.90, I48.2, I48.91, Z66, I10, E78.5, I25.10, Z95.5, D50.0, Z86.718, N18.3, I12.9, K57.30
0192070	259368264	2015-10-15	2015-10-22	7	Z74.01	Bed confinement status	22		Q27.33, E87.2, I42.9, I50.32, D62, K62.6, K92.1, E83.42, F03.90, I48.2, I48.91, Z66, I10, E78.5, I25.10, Z95.5, D50.0, Z86.718, N18.3, I12.9, K57.30, Z74.01
0192070	259368264	2015-10-15	2015-10-22	7	Z85.3	Personal history of malignant neoplasm of breast	23		Q27.33, E87.2, I42.9, I50.32, D62, K62.6, K92.1, E83.42, F03.90, I48.2, I48.91, Z66, I10, E78.5, I25.10, Z95.5, D50.0, Z86.718, N18.3, I12.9, K57.30, Z74.01, Z85.3
0192070	259368264	2015-10-15	2015-10-22	7	Z79.01	Long term (current) use of anticoagulants	24		Q27.33, E87.2, I42.9, I50.32, D62, K62.6, K92.1, E83.42, F03.90, I48.2, I48.91, Z66, I10, E78.5, I25.10, Z95.5, D50.0, Z86.718, N18.3, I12.9, K57.30, Z74.01, Z85.3, Z79.01
0192070	259368264	2015-10-15	2015-10-22	7	E87.6	Hypokalemia	25	Y	Q27.33, E87.2, I42.9, I50.32, D62, K62.6, K92.1, E83.42, F03.90, I48.2, I48.91, Z66, I10, E78.5, I25.10, Z95.5, D50.0, Z86.718, N18.3, I12.9, K57.30, Z74.01, Z85.3, Z79.01, E87.6
0192070	259368264	2015-10-15	2015-10-22	7	R42	Dizziness and giddiness	26	Y	Q27.33, E87.2, I42.9, I50.32, D62, K62.6, K92.1, E83.42, F03.90, I48.2, I48.91, Z66, I10, E78.5, I25.10, Z95.5, D50.0, Z86.718, N18.3, I12.9, K57.30, Z74.01, Z85.3, Z79.01, E87.6, R42
0192070	259368264	2015-10-15	2015-10-22	7	K56.41	Fecal impaction	27	Y	Q27.33, E87.2, I42.9, I50.32, D62, K62.6, K92.1, E83.42, F03.90, I48.2, I48.91, Z66, I10, E78.5, I25.10, Z95.5, D50.0, Z86.718, N18.3, I12.9, K57.30, Z74.01, Z85.3, Z79.01, E87.6, R42, K56.41
0192070	259368264	2015-10-15	2015-10-22	7	K31.9	Disease of stomach and duodenum, unspecified	28	Y	Q27.33, E87.2, I42.9, I50.32, D62, K62.6, K92.1, E83.42, F03.90, I48.2, I48.91, Z66, I10, E78.5, I25.10, Z95.5, D50.0, Z86.718, N18.3, I12.9, K57.30, Z74.01, Z85.3, Z79.01, E87.6, R42, K56.41, K31.9	Last
0193414	260678966	2015-12-02	2015-12-05	3	I49.5	Sick sinus syndrome	1	Y	I49.5
0193414	260678966	2015-12-02	2015-12-05	3	I50.30	Unspecified diastolic (congestive) heart failure	2	Y	I49.5, I50.30
0193414	260678966	2015-12-02	2015-12-05	3	E11.42	Type 2 diabetes mellitus with diabetic polyneuropa	3	Y	I49.5, I50.30, E11.42
0193414	260678966	2015-12-02	2015-12-05	3	Q21.1	Atrial septal defect	4		I49.5, I50.30, E11.42, Q21.1
0193414	260678966	2015-12-02	2015-12-05	3	G47.33	Obstructive sleep apnea (adult) (pediatric)	5	Y	I49.5, I50.30, E11.42, Q21.1, G47.33
0193414	260678966	2015-12-02	2015-12-05	3	I10	Essential (primary) hypertension	6	Y	I49.5, I50.30, E11.42, Q21.1, G47.33, I10
0193414	260678966	2015-12-02	2015-12-05	3	I35.0	Nonrheumatic aortic (valve) stenosis	7	Y	I49.5, I50.30, E11.42, Q21.1, G47.33, I10, I35.0
0193414	260678966	2015-12-02	2015-12-05	3	E78.0	Pure hypercholesterolemia	8	Y	I49.5, I50.30, E11.42, Q21.1, G47.33, I10, I35.0, E78.0
0193414	260678966	2015-12-02	2015-12-05	3	N40.0	Enlarged prostate without lower urinary tract symp	9	Y	I49.5, I50.30, E11.42, Q21.1, G47.33, I10, I35.0, E78.0, N40.0
0193414	260678966	2015-12-02	2015-12-05	3	K21.9	Gastro-esophageal reflux disease without esophagit	10	Y	I49.5, I50.30, E11.42, Q21.1, G47.33, I10, I35.0, E78.0, N40.0, K21.9
0193414	260678966	2015-12-02	2015-12-05	3	M10.9	Gout, unspecified	11	Y	I49.5, I50.30, E11.42, Q21.1, G47.33, I10, I35.0, E78.0, N40.0, K21.9, M10.9
0193414	260678966	2015-12-02	2015-12-05	3	G43.909	Migraine, unspecified, not intractable, without st	12	Y	I49.5, I50.30, E11.42, Q21.1, G47.33, I10, I35.0, E78.0, N40.0, K21.9, M10.9, G43.909
0193414	260678966	2015-12-02	2015-12-05	3	Z87.891	Personal history of nicotine dependence	13		I49.5, I50.30, E11.42, Q21.1, G47.33, I10, I35.0, E78.0, N40.0, K21.9, M10.9, G43.909, Z87.891	Last
0195985	259288900	2015-10-13	2015-10-20	7	M79.3	Panniculitis, unspecified	1	Y	M79.3
0195985	259288900	2015-10-13	2015-10-20	7	I50.32	Chronic diastolic (congestive) heart failure	2	Y	M79.3, I50.32
0195985	259288900	2015-10-13	2015-10-20	7	B37.81	Candidal esophagitis	3	Y	M79.3, I50.32, B37.81
0195985	259288900	2015-10-13	2015-10-20	7	E11.649	Type 2 diabetes mellitus with hypoglycemia without	4	Y	M79.3, I50.32, B37.81, E11.649
0195985	259288900	2015-10-13	2015-10-20	7	D69.6	Thrombocytopenia, unspecified	5	Y	M79.3, I50.32, B37.81, E11.649, D69.6
0195985	259288900	2015-10-13	2015-10-20	7	L89.892	Pressure ulcer of other site, stage 2	6	Y	M79.3, I50.32, B37.81, E11.649, D69.6, L89.892
0195985	259288900	2015-10-13	2015-10-20	7	Z79.4	Long term (current) use of insulin	7		M79.3, I50.32, B37.81, E11.649, D69.6, L89.892, Z79.4
0195985	259288900	2015-10-13	2015-10-20	7	K44.9	Diaphragmatic hernia without obstruction or gangre	8	Y	M79.3, I50.32, B37.81, E11.649, D69.6, L89.892, Z79.4, K44.9
0195985	259288900	2015-10-13	2015-10-20	7	R21	Rash and other nonspecific skin eruption	9	Y	M79.3, I50.32, B37.81, E11.649, D69.6, L89.892, Z79.4, K44.9, R21
0195985	259288900	2015-10-13	2015-10-20	7	F17.210	Nicotine dependence, cigarettes, uncomplicated	10	Y	M79.3, I50.32, B37.81, E11.649, D69.6, L89.892, Z79.4, K44.9, R21, F17.210
0195985	259288900	2015-10-13	2015-10-20	7	I10	Essential (primary) hypertension	11	Y	M79.3, I50.32, B37.81, E11.649, D69.6, L89.892, Z79.4, K44.9, R21, F17.210, I10
0195985	259288900	2015-10-13	2015-10-20	7	J44.9	Chronic obstructive pulmonary disease, unspecified	12	Y	M79.3, I50.32, B37.81, E11.649, D69.6, L89.892, Z79.4, K44.9, R21, F17.210, I10, J44.9
0195985	259288900	2015-10-13	2015-10-20	7	D64.9	Anemia, unspecified	13	Y	M79.3, I50.32, B37.81, E11.649, D69.6, L89.892, Z79.4, K44.9, R21, F17.210, I10, J44.9, D64.9
0195985	259288900	2015-10-13	2015-10-20	7	K29.60	Other gastritis without bleeding	14	Y	M79.3, I50.32, B37.81, E11.649, D69.6, L89.892, Z79.4, K44.9, R21, F17.210, I10, J44.9, D64.9, K29.60	Last
0195985	259865863	2015-11-02	2015-11-13	11	N17.9	Acute kidney failure, unspecified	1	Y	N17.9
0195985	259865863	2015-11-02	2015-11-13	11	I50.32	Chronic diastolic (congestive) heart failure	2	Y	N17.9, I50.32
0195985	259865863	2015-11-02	2015-11-13	11	D72.1	Eosinophilia	3	Y	N17.9, I50.32, D72.1
0195985	259865863	2015-11-02	2015-11-13	11	K76.0	Fatty (change of) liver, not elsewhere classified	4	Y	N17.9, I50.32, D72.1, K76.0
0195985	259865863	2015-11-02	2015-11-13	11	E11.65	Type 2 diabetes mellitus with hyperglycemia	5	Y	N17.9, I50.32, D72.1, K76.0, E11.65
0195985	259865863	2015-11-02	2015-11-13	11	N12	Tubulo-interstitial nephritis, not specified as ac	6	Y	N17.9, I50.32, D72.1, K76.0, E11.65, N12
0195985	259865863	2015-11-02	2015-11-13	11	B96.89	Other specified bacterial agents as the cause of d	7	Y	N17.9, I50.32, D72.1, K76.0, E11.65, N12, B96.89
0195985	259865863	2015-11-02	2015-11-13	11	R63.0	Anorexia	8	Y	N17.9, I50.32, D72.1, K76.0, E11.65, N12, B96.89, R63.0
0195985	259865863	2015-11-02	2015-11-13	11	R13.10	Dysphagia, unspecified	9	Y	N17.9, I50.32, D72.1, K76.0, E11.65, N12, B96.89, R63.0, R13.10
0195985	259865863	2015-11-02	2015-11-13	11	D64.89	Other specified anemias	10	Y	N17.9, I50.32, D72.1, K76.0, E11.65, N12, B96.89, R63.0, R13.10, D64.89
0195985	259865863	2015-11-02	2015-11-13	11	K21.9	Gastro-esophageal reflux disease without esophagit	11	Y	N17.9, I50.32, D72.1, K76.0, E11.65, N12, B96.89, R63.0, R13.10, D64.89, K21.9
0195985	259865863	2015-11-02	2015-11-13	11	M19.90	Unspecified osteoarthritis, unspecified site	12	Y	N17.9, I50.32, D72.1, K76.0, E11.65, N12, B96.89, R63.0, R13.10, D64.89, K21.9, M19.90
0195985	259865863	2015-11-02	2015-11-13	11	M79.7	Fibromyalgia	13	Y	N17.9, I50.32, D72.1, K76.0, E11.65, N12, B96.89, R63.0, R13.10, D64.89, K21.9, M19.90, M79.7
0195985	259865863	2015-11-02	2015-11-13	11	Z79.4	Long term (current) use of insulin	14		N17.9, I50.32, D72.1, K76.0, E11.65, N12, B96.89, R63.0, R13.10, D64.89, K21.9, M19.90, M79.7, Z79.4
0195985	259865863	2015-11-02	2015-11-13	11	M79.3	Panniculitis, unspecified	15	Y	N17.9, I50.32, D72.1, K76.0, E11.65, N12, B96.89, R63.0, R13.10, D64.89, K21.9, M19.90, M79.7, Z79.4, M79.3
0195985	259865863	2015-11-02	2015-11-13	11	L29.9	Pruritus, unspecified	16	Y	N17.9, I50.32, D72.1, K76.0, E11.65, N12, B96.89, R63.0, R13.10, D64.89, K21.9, M19.90, M79.7, Z79.4, M79.3, L29.9
0195985	259865863	2015-11-02	2015-11-13	11	K58.9	Irritable bowel syndrome without diarrhea	17	Y	N17.9, I50.32, D72.1, K76.0, E11.65, N12, B96.89, R63.0, R13.10, D64.89, K21.9, M19.90, M79.7, Z79.4, M79.3, L29.9, K58.9
0195985	259865863	2015-11-02	2015-11-13	11	R21	Rash and other nonspecific skin eruption	18	Y	N17.9, I50.32, D72.1, K76.0, E11.65, N12, B96.89, R63.0, R13.10, D64.89, K21.9, M19.90, M79.7, Z79.4, M79.3, L29.9, K58.9, R21
0195985	259865863	2015-11-02	2015-11-13	11	Z91.81	History of falling	19		N17.9, I50.32, D72.1, K76.0, E11.65, N12, B96.89, R63.0, R13.10, D64.89, K21.9, M19.90, M79.7, Z79.4, M79.3, L29.9, K58.9, R21, Z91.81
0195985	259865863	2015-11-02	2015-11-13	11	K29.60	Other gastritis without bleeding	20	Y	N17.9, I50.32, D72.1, K76.0, E11.65, N12, B96.89, R63.0, R13.10, D64.89, K21.9, M19.90, M79.7, Z79.4, M79.3, L29.9, K58.9, R21, Z91.81, K29.60
0195985	259865863	2015-11-02	2015-11-13	11	L30.4	Erythema intertrigo	21	Y	N17.9, I50.32, D72.1, K76.0, E11.65, N12, B96.89, R63.0, R13.10, D64.89, K21.9, M19.90, M79.7, Z79.4, M79.3, L29.9, K58.9, R21, Z91.81, K29.60, L30.4
0195985	259865863	2015-11-02	2015-11-13	11	R16.1	Splenomegaly, not elsewhere classified	22	Y	N17.9, I50.32, D72.1, K76.0, E11.65, N12, B96.89, R63.0, R13.10, D64.89, K21.9, M19.90, M79.7, Z79.4, M79.3, L29.9, K58.9, R21, Z91.81, K29.60, L30.4, R16.1
0195985	259865863	2015-11-02	2015-11-13	11	Z68.39	Body mass index (BMI) 39.0-39.9, adult	23		N17.9, I50.32, D72.1, K76.0, E11.65, N12, B96.89, R63.0, R13.10, D64.89, K21.9, M19.90, M79.7, Z79.4, M79.3, L29.9, K58.9, R21, Z91.81, K29.60, L30.4, R16.1, Z68.39
0195985	259865863	2015-11-02	2015-11-13	11	H91.91	Unspecified hearing loss, right ear	24	Y	N17.9, I50.32, D72.1, K76.0, E11.65, N12, B96.89, R63.0, R13.10, D64.89, K21.9, M19.90, M79.7, Z79.4, M79.3, L29.9, K58.9, R21, Z91.81, K29.60, L30.4, R16.1, Z68.39, H91.91
0195985	259865863	2015-11-02	2015-11-13	11	D50.9	Iron deficiency anemia, unspecified	25	Y	N17.9, I50.32, D72.1, K76.0, E11.65, N12, B96.89, R63.0, R13.10, D64.89, K21.9, M19.90, M79.7, Z79.4, M79.3, L29.9, K58.9, R21, Z91.81, K29.60, L30.4, R16.1, Z68.39, H91.91, D50.9
0195985	259865863	2015-11-02	2015-11-13	11	B95.2	Enterococcus as the cause of diseases classified e	26	Y	N17.9, I50.32, D72.1, K76.0, E11.65, N12, B96.89, R63.0, R13.10, D64.89, K21.9, M19.90, M79.7, Z79.4, M79.3, L29.9, K58.9, R21, Z91.81, K29.60, L30.4, R16.1, Z68.39, H91.91, D50.9, B95.2
0195985	259865863	2015-11-02	2015-11-13	11	B95.7	Other staphylococcus as the cause of diseases clas	27	Y	N17.9, I50.32, D72.1, K76.0, E11.65, N12, B96.89, R63.0, R13.10, D64.89, K21.9, M19.90, M79.7, Z79.4, M79.3, L29.9, K58.9, R21, Z91.81, K29.60, L30.4, R16.1, Z68.39, H91.91, D50.9, B95.2, B95.7
0195985	259865863	2015-11-02	2015-11-13	11	R63.3	Feeding difficulties	28	Y	N17.9, I50.32, D72.1, K76.0, E11.65, N12, B96.89, R63.0, R13.10, D64.89, K21.9, M19.90, M79.7, Z79.4, M79.3, L29.9, K58.9, R21, Z91.81, K29.60, L30.4, R16.1, Z68.39, H91.91, D50.9, B95.2, B95.7, R63.3
0195985	259865863	2015-11-02	2015-11-13	11	K44.9	Diaphragmatic hernia without obstruction or gangre	29	Y	N17.9, I50.32, D72.1, K76.0, E11.65, N12, B96.89, R63.0, R13.10, D64.89, K21.9, M19.90, M79.7, Z79.4, M79.3, L29.9, K58.9, R21, Z91.81, K29.60, L30.4, R16.1, Z68.39, H91.91, D50.9, B95.2, B95.7, R63.3, K44.9
0195985	259865863	2015-11-02	2015-11-13	11	L98.499	Non-pressure chronic ulcer of skin of other sites	30	Y	N17.9, I50.32, D72.1, K76.0, E11.65, N12, B96.89, R63.0, R13.10, D64.89, K21.9, M19.90, M79.7, Z79.4, M79.3, L29.9, K58.9, R21, Z91.81, K29.60, L30.4, R16.1, Z68.39, H91.91, D50.9, B95.2, B95.7, R63.3, K44.9, L98.499	Last
0197165	258848662	2015-10-05	2015-10-14	9	T78.3XXA	Angioneurotic edema, initial encounter	1	Y	T78.3XXA
0197165	258848662	2015-10-05	2015-10-14	9	J96.01	Acute respiratory failure with hypoxia	2	Y	T78.3XXA, J96.01
0197165	258848662	2015-10-05	2015-10-14	9	E87.2	Acidosis	3	Y	T78.3XXA, J96.01, E87.2
0197165	258848662	2015-10-05	2015-10-14	9	I74.2	Embolism and thrombosis of arteries of the upper e	4	Y	T78.3XXA, J96.01, E87.2, I74.2
0197165	258848662	2015-10-05	2015-10-14	9	N18.6	End stage renal disease	5	Y	T78.3XXA, J96.01, E87.2, I74.2, N18.6
0197165	258848662	2015-10-05	2015-10-14	9	I12.0	Hypertensive chronic kidney disease with stage 5 c	6	Y	T78.3XXA, J96.01, E87.2, I74.2, N18.6, I12.0
0197165	258848662	2015-10-05	2015-10-14	9	R00.1	Bradycardia, unspecified	7	N	T78.3XXA, J96.01, E87.2, I74.2, N18.6, I12.0, R00.1
0197165	258848662	2015-10-05	2015-10-14	9	T82.868A	Thrombosis of vascular prosthetic devices, implant	8	Y	T78.3XXA, J96.01, E87.2, I74.2, N18.6, I12.0, R00.1, T82.868A
0197165	258848662	2015-10-05	2015-10-14	9	T88.6XXA	Anaphylactic reaction due to adverse effect of cor	9	Y	T78.3XXA, J96.01, E87.2, I74.2, N18.6, I12.0, R00.1, T82.868A, T88.6XXA
0197165	258848662	2015-10-05	2015-10-14	9	T81.30XA	Disruption of wound, unspecified, initial encounte	10	N	T78.3XXA, J96.01, E87.2, I74.2, N18.6, I12.0, R00.1, T82.868A, T88.6XXA, T81.30XA
0197165	258848662	2015-10-05	2015-10-14	9	I50.32	Chronic diastolic (congestive) heart failure	11	Y	T78.3XXA, J96.01, E87.2, I74.2, N18.6, I12.0, R00.1, T82.868A, T88.6XXA, T81.30XA, I50.32
0197165	258848662	2015-10-05	2015-10-14	9	D63.1	Anemia in chronic kidney disease	12	Y	T78.3XXA, J96.01, E87.2, I74.2, N18.6, I12.0, R00.1, T82.868A, T88.6XXA, T81.30XA, I50.32, D63.1
0197165	258848662	2015-10-05	2015-10-14	9	G47.33	Obstructive sleep apnea (adult) (pediatric)	13	Y	T78.3XXA, J96.01, E87.2, I74.2, N18.6, I12.0, R00.1, T82.868A, T88.6XXA, T81.30XA, I50.32, D63.1, G47.33
0197165	258848662	2015-10-05	2015-10-14	9	E78.5	Hyperlipidemia, unspecified	14	Y	T78.3XXA, J96.01, E87.2, I74.2, N18.6, I12.0, R00.1, T82.868A, T88.6XXA, T81.30XA, I50.32, D63.1, G47.33, E78.5
0197165	258848662	2015-10-05	2015-10-14	9	Z99.2	Dependence on renal dialysis	15		T78.3XXA, J96.01, E87.2, I74.2, N18.6, I12.0, R00.1, T82.868A, T88.6XXA, T81.30XA, I50.32, D63.1, G47.33, E78.5, Z99.2
0197165	258848662	2015-10-05	2015-10-14	9	T50.8X5A	Adverse effect of diagnostic agents, initial encou	16	Y	T78.3XXA, J96.01, E87.2, I74.2, N18.6, I12.0, R00.1, T82.868A, T88.6XXA, T81.30XA, I50.32, D63.1, G47.33, E78.5, Z99.2, T50.8X5A
0197165	258848662	2015-10-05	2015-10-14	9	Y83.8	Other surgical procedures as the cause of abnormal	17	Y	T78.3XXA, J96.01, E87.2, I74.2, N18.6, I12.0, R00.1, T82.868A, T88.6XXA, T81.30XA, I50.32, D63.1, G47.33, E78.5, Z99.2, T50.8X5A, Y83.8
0197165	258848662	2015-10-05	2015-10-14	9	Y92.234	Operating room of hospital as the place of occurre	18		T78.3XXA, J96.01, E87.2, I74.2, N18.6, I12.0, R00.1, T82.868A, T88.6XXA, T81.30XA, I50.32, D63.1, G47.33, E78.5, Z99.2, T50.8X5A, Y83.8, Y92.234
0197165	258848662	2015-10-05	2015-10-14	9	I25.10	Atherosclerotic heart disease of native coronary a	19	Y	T78.3XXA, J96.01, E87.2, I74.2, N18.6, I12.0, R00.1, T82.868A, T88.6XXA, T81.30XA, I50.32, D63.1, G47.33, E78.5, Z99.2, T50.8X5A, Y83.8, Y92.234, I25.10
0197165	258848662	2015-10-05	2015-10-14	9	E11.21	Type 2 diabetes mellitus with diabetic nephropathy	20	Y	T78.3XXA, J96.01, E87.2, I74.2, N18.6, I12.0, R00.1, T82.868A, T88.6XXA, T81.30XA, I50.32, D63.1, G47.33, E78.5, Z99.2, T50.8X5A, Y83.8, Y92.234, I25.10, E11.21
0197165	258848662	2015-10-05	2015-10-14	9	Z79.4	Long term (current) use of insulin	21		T78.3XXA, J96.01, E87.2, I74.2, N18.6, I12.0, R00.1, T82.868A, T88.6XXA, T81.30XA, I50.32, D63.1, G47.33, E78.5, Z99.2, T50.8X5A, Y83.8, Y92.234, I25.10, E11.21, Z79.4
0197165	258848662	2015-10-05	2015-10-14	9	Z88.0	Allergy status to penicillin	22		T78.3XXA, J96.01, E87.2, I74.2, N18.6, I12.0, R00.1, T82.868A, T88.6XXA, T81.30XA, I50.32, D63.1, G47.33, E78.5, Z99.2, T50.8X5A, Y83.8, Y92.234, I25.10, E11.21, Z79.4, Z88.0
0197165	258848662	2015-10-05	2015-10-14	9	Z86.19	Personal history of other infectious and parasitic	23		T78.3XXA, J96.01, E87.2, I74.2, N18.6, I12.0, R00.1, T82.868A, T88.6XXA, T81.30XA, I50.32, D63.1, G47.33, E78.5, Z99.2, T50.8X5A, Y83.8, Y92.234, I25.10, E11.21, Z79.4, Z88.0, Z86.19
0197165	258848662	2015-10-05	2015-10-14	9	Z88.2	Allergy status to sulfonamides status	24		T78.3XXA, J96.01, E87.2, I74.2, N18.6, I12.0, R00.1, T82.868A, T88.6XXA, T81.30XA, I50.32, D63.1, G47.33, E78.5, Z99.2, T50.8X5A, Y83.8, Y92.234, I25.10, E11.21, Z79.4, Z88.0, Z86.19, Z88.2
0197165	258848662	2015-10-05	2015-10-14	9	Z82.49	Family history of ischemic heart disease and other	25		T78.3XXA, J96.01, E87.2, I74.2, N18.6, I12.0, R00.1, T82.868A, T88.6XXA, T81.30XA, I50.32, D63.1, G47.33, E78.5, Z99.2, T50.8X5A, Y83.8, Y92.234, I25.10, E11.21, Z79.4, Z88.0, Z86.19, Z88.2, Z82.49	Last
0197165	261386460	2015-12-29	2015-12-31	2	A41.9	Sepsis, unspecified organism	1	Y	A41.9
0197165	261386460	2015-12-29	2015-12-31	2	N18.6	End stage renal disease	2	Y	A41.9, N18.6
0197165	261386460	2015-12-29	2015-12-31	2	R65.20	Severe sepsis without septic shock	3	Y	A41.9, N18.6, R65.20
0197165	261386460	2015-12-29	2015-12-31	2	I12.0	Hypertensive chronic kidney disease with stage 5 c	4	Y	A41.9, N18.6, R65.20, I12.0
0197165	261386460	2015-12-29	2015-12-31	2	I50.30	Unspecified diastolic (congestive) heart failure	5	Y	A41.9, N18.6, R65.20, I12.0, I50.30
0197165	261386460	2015-12-29	2015-12-31	2	T82.898A	Other specified complication of vascular prostheti	6	N	A41.9, N18.6, R65.20, I12.0, I50.30, T82.898A
0197165	261386460	2015-12-29	2015-12-31	2	E78.5	Hyperlipidemia, unspecified	7	Y	A41.9, N18.6, R65.20, I12.0, I50.30, T82.898A, E78.5
0197165	261386460	2015-12-29	2015-12-31	2	E11.9	Type 2 diabetes mellitus without complications	8	Y	A41.9, N18.6, R65.20, I12.0, I50.30, T82.898A, E78.5, E11.9
0197165	261386460	2015-12-29	2015-12-31	2	I50.9	Heart failure, unspecified	9	Y	A41.9, N18.6, R65.20, I12.0, I50.30, T82.898A, E78.5, E11.9, I50.9
0197165	261386460	2015-12-29	2015-12-31	2	J44.9	Chronic obstructive pulmonary disease, unspecified	10	Y	A41.9, N18.6, R65.20, I12.0, I50.30, T82.898A, E78.5, E11.9, I50.9, J44.9
0197165	261386460	2015-12-29	2015-12-31	2	E11.21	Type 2 diabetes mellitus with diabetic nephropathy	11	Y	A41.9, N18.6, R65.20, I12.0, I50.30, T82.898A, E78.5, E11.9, I50.9, J44.9, E11.21
0197165	261386460	2015-12-29	2015-12-31	2	E87.6	Hypokalemia	12	Y	A41.9, N18.6, R65.20, I12.0, I50.30, T82.898A, E78.5, E11.9, I50.9, J44.9, E11.21, E87.6
0197165	261386460	2015-12-29	2015-12-31	2	I25.10	Atherosclerotic heart disease of native coronary a	13	Y	A41.9, N18.6, R65.20, I12.0, I50.30, T82.898A, E78.5, E11.9, I50.9, J44.9, E11.21, E87.6, I25.10
0197165	261386460	2015-12-29	2015-12-31	2	G47.33	Obstructive sleep apnea (adult) (pediatric)	14	Y	A41.9, N18.6, R65.20, I12.0, I50.30, T82.898A, E78.5, E11.9, I50.9, J44.9, E11.21, E87.6, I25.10, G47.33
0197165	261386460	2015-12-29	2015-12-31	2	Z79.4	Long term (current) use of insulin	15		A41.9, N18.6, R65.20, I12.0, I50.30, T82.898A, E78.5, E11.9, I50.9, J44.9, E11.21, E87.6, I25.10, G47.33, Z79.4
0197165	261386460	2015-12-29	2015-12-31	2	Z88.0	Allergy status to penicillin	16		A41.9, N18.6, R65.20, I12.0, I50.30, T82.898A, E78.5, E11.9, I50.9, J44.9, E11.21, E87.6, I25.10, G47.33, Z79.4, Z88.0
0197165	261386460	2015-12-29	2015-12-31	2	Z88.6	Allergy status to analgesic agent status	17		A41.9, N18.6, R65.20, I12.0, I50.30, T82.898A, E78.5, E11.9, I50.9, J44.9, E11.21, E87.6, I25.10, G47.33, Z79.4, Z88.0, Z88.6
0197165	261386460	2015-12-29	2015-12-31	2	Z88.2	Allergy status to sulfonamides status	18		A41.9, N18.6, R65.20, I12.0, I50.30, T82.898A, E78.5, E11.9, I50.9, J44.9, E11.21, E87.6, I25.10, G47.33, Z79.4, Z88.0, Z88.6, Z88.2
0197165	261386460	2015-12-29	2015-12-31	2	Z87.891	Personal history of nicotine dependence	19		A41.9, N18.6, R65.20, I12.0, I50.30, T82.898A, E78.5, E11.9, I50.9, J44.9, E11.21, E87.6, I25.10, G47.33, Z79.4, Z88.0, Z88.6, Z88.2, Z87.891
0197165	261386460	2015-12-29	2015-12-31	2	Z99.2	Dependence on renal dialysis	20		A41.9, N18.6, R65.20, I12.0, I50.30, T82.898A, E78.5, E11.9, I50.9, J44.9, E11.21, E87.6, I25.10, G47.33, Z79.4, Z88.0, Z88.6, Z88.2, Z87.891, Z99.2	Last
0197165	262254188	2016-01-28	2016-02-01	4	I63.432	Cerebral infarction due to embolism of left poster	1	Y	I63.432
0197165	262254188	2016-01-28	2016-02-01	4	I50.30	Unspecified diastolic (congestive) heart failure	2	Y	I63.432, I50.30
0197165	262254188	2016-01-28	2016-02-01	4	N18.6	End stage renal disease	3	Y	I63.432, I50.30, N18.6
0197165	262254188	2016-01-28	2016-02-01	4	T82.868A	Thrombosis of vascular prosthetic devices, implant	4	Y	I63.432, I50.30, N18.6, T82.868A
0197165	262254188	2016-01-28	2016-02-01	4	I12.0	Hypertensive chronic kidney disease with stage 5 c	5	Y	I63.432, I50.30, N18.6, T82.868A, I12.0
0197165	262254188	2016-01-28	2016-02-01	4	E11.9	Type 2 diabetes mellitus without complications	6	Y	I63.432, I50.30, N18.6, T82.868A, I12.0, E11.9
0197165	262254188	2016-01-28	2016-02-01	4	D64.9	Anemia, unspecified	7	Y	I63.432, I50.30, N18.6, T82.868A, I12.0, E11.9, D64.9
0197165	262254188	2016-01-28	2016-02-01	4	I25.10	Atherosclerotic heart disease of native coronary a	8	Y	I63.432, I50.30, N18.6, T82.868A, I12.0, E11.9, D64.9, I25.10
0197165	262254188	2016-01-28	2016-02-01	4	Y83.2	Surgical operation with anastomosis, bypass or gra	9	Y	I63.432, I50.30, N18.6, T82.868A, I12.0, E11.9, D64.9, I25.10, Y83.2
0197165	262254188	2016-01-28	2016-02-01	4	R47.01	Aphasia	10	Y	I63.432, I50.30, N18.6, T82.868A, I12.0, E11.9, D64.9, I25.10, Y83.2, R47.01
0197165	262254188	2016-01-28	2016-02-01	4	Z79.4	Long term (current) use of insulin	11		I63.432, I50.30, N18.6, T82.868A, I12.0, E11.9, D64.9, I25.10, Y83.2, R47.01, Z79.4
0197165	262254188	2016-01-28	2016-02-01	4	Z99.2	Dependence on renal dialysis	12		I63.432, I50.30, N18.6, T82.868A, I12.0, E11.9, D64.9, I25.10, Y83.2, R47.01, Z79.4, Z99.2
0197165	262254188	2016-01-28	2016-02-01	4	Z88.6	Allergy status to analgesic agent status	13		I63.432, I50.30, N18.6, T82.868A, I12.0, E11.9, D64.9, I25.10, Y83.2, R47.01, Z79.4, Z99.2, Z88.6
0197165	262254188	2016-01-28	2016-02-01	4	G47.33	Obstructive sleep apnea (adult) (pediatric)	14	Y	I63.432, I50.30, N18.6, T82.868A, I12.0, E11.9, D64.9, I25.10, Y83.2, R47.01, Z79.4, Z99.2, Z88.6, G47.33
0197165	262254188	2016-01-28	2016-02-01	4	E78.5	Hyperlipidemia, unspecified	15	Y	I63.432, I50.30, N18.6, T82.868A, I12.0, E11.9, D64.9, I25.10, Y83.2, R47.01, Z79.4, Z99.2, Z88.6, G47.33, E78.5
0197165	262254188	2016-01-28	2016-02-01	4	Z87.891	Personal history of nicotine dependence	16		I63.432, I50.30, N18.6, T82.868A, I12.0, E11.9, D64.9, I25.10, Y83.2, R47.01, Z79.4, Z99.2, Z88.6, G47.33, E78.5, Z87.891
0197165	262254188	2016-01-28	2016-02-01	4	Z88.0	Allergy status to penicillin	17		I63.432, I50.30, N18.6, T82.868A, I12.0, E11.9, D64.9, I25.10, Y83.2, R47.01, Z79.4, Z99.2, Z88.6, G47.33, E78.5, Z87.891, Z88.0
0197165	262254188	2016-01-28	2016-02-01	4	Z88.2	Allergy status to sulfonamides status	18		I63.432, I50.30, N18.6, T82.868A, I12.0, E11.9, D64.9, I25.10, Y83.2, R47.01, Z79.4, Z99.2, Z88.6, G47.33, E78.5, Z87.891, Z88.0, Z88.2
0197165	262254188	2016-01-28	2016-02-01	4	Z88.8	Allergy status to other drugs, medicaments and bio	19		I63.432, I50.30, N18.6, T82.868A, I12.0, E11.9, D64.9, I25.10, Y83.2, R47.01, Z79.4, Z99.2, Z88.6, G47.33, E78.5, Z87.891, Z88.0, Z88.2, Z88.8
0197165	262254188	2016-01-28	2016-02-01	4	Z91.041	Radiographic dye allergy status	20		I63.432, I50.30, N18.6, T82.868A, I12.0, E11.9, D64.9, I25.10, Y83.2, R47.01, Z79.4, Z99.2, Z88.6, G47.33, E78.5, Z87.891, Z88.0, Z88.2, Z88.8, Z91.041
0197165	262254188	2016-01-28	2016-02-01	4	L50.9	Urticaria, unspecified	21	N	I63.432, I50.30, N18.6, T82.868A, I12.0, E11.9, D64.9, I25.10, Y83.2, R47.01, Z79.4, Z99.2, Z88.6, G47.33, E78.5, Z87.891, Z88.0, Z88.2, Z88.8, Z91.041, L50.9
0197165	262254188	2016-01-28	2016-02-01	4	Z87.892	Personal history of anaphylaxis	22		I63.432, I50.30, N18.6, T82.868A, I12.0, E11.9, D64.9, I25.10, Y83.2, R47.01, Z79.4, Z99.2, Z88.6, G47.33, E78.5, Z87.891, Z88.0, Z88.2, Z88.8, Z91.041, L50.9, Z87.892	Last
0200221	261891287	2016-01-17	2016-01-22	5	E22.2	Syndrome of inappropriate secretion of antidiureti	1	Y	E22.2
0200221	261891287	2016-01-17	2016-01-22	5	J96.01	Acute respiratory failure with hypoxia	2	Y	E22.2, J96.01
0200221	261891287	2016-01-17	2016-01-22	5	J44.1	Chronic obstructive pulmonary disease with (acute)	3	Y	E22.2, J96.01, J44.1
0200221	261891287	2016-01-17	2016-01-22	5	F10.239	Alcohol dependence with withdrawal, unspecified	4	Y	E22.2, J96.01, J44.1, F10.239
0200221	261891287	2016-01-17	2016-01-22	5	I10	Essential (primary) hypertension	5	Y	E22.2, J96.01, J44.1, F10.239, I10
0200221	261891287	2016-01-17	2016-01-22	5	E78.5	Hyperlipidemia, unspecified	6	Y	E22.2, J96.01, J44.1, F10.239, I10, E78.5
0200221	261891287	2016-01-17	2016-01-22	5	E53.8	Deficiency of other specified B group vitamins	7	Y	E22.2, J96.01, J44.1, F10.239, I10, E78.5, E53.8
0200221	261891287	2016-01-17	2016-01-22	5	F17.200	Nicotine dependence, unspecified, uncomplicated	8	Y	E22.2, J96.01, J44.1, F10.239, I10, E78.5, E53.8, F17.200
0200221	261891287	2016-01-17	2016-01-22	5	K76.0	Fatty (change of) liver, not elsewhere classified	9	Y	E22.2, J96.01, J44.1, F10.239, I10, E78.5, E53.8, F17.200, K76.0
0200221	261891287	2016-01-17	2016-01-22	5	E83.51	Hypocalcemia	10	Y	E22.2, J96.01, J44.1, F10.239, I10, E78.5, E53.8, F17.200, K76.0, E83.51
0200221	261891287	2016-01-17	2016-01-22	5	E87.6	Hypokalemia	11	Y	E22.2, J96.01, J44.1, F10.239, I10, E78.5, E53.8, F17.200, K76.0, E83.51, E87.6
0200221	261891287	2016-01-17	2016-01-22	5	D53.9	Nutritional anemia, unspecified	12	Y	E22.2, J96.01, J44.1, F10.239, I10, E78.5, E53.8, F17.200, K76.0, E83.51, E87.6, D53.9
0200221	261891287	2016-01-17	2016-01-22	5	R33.9	Retention of urine, unspecified	13	Y	E22.2, J96.01, J44.1, F10.239, I10, E78.5, E53.8, F17.200, K76.0, E83.51, E87.6, D53.9, R33.9
0200221	261891287	2016-01-17	2016-01-22	5	Y90.8	Blood alcohol level of 240 mg/100 ml or more	14	Y	E22.2, J96.01, J44.1, F10.239, I10, E78.5, E53.8, F17.200, K76.0, E83.51, E87.6, D53.9, R33.9, Y90.8	Last
0200430	259943066	2015-11-04	2015-11-06	2	C22.0	Liver cell carcinoma	1	Y	C22.0
0200430	259943066	2015-11-04	2015-11-06	2	I81	Portal vein thrombosis	2	Y	C22.0, I81
0200430	259943066	2015-11-04	2015-11-06	2	D69.6	Thrombocytopenia, unspecified	3	Y	C22.0, I81, D69.6
0200430	259943066	2015-11-04	2015-11-06	2	K74.60	Unspecified cirrhosis of liver	4	Y	C22.0, I81, D69.6, K74.60
0200430	259943066	2015-11-04	2015-11-06	2	E88.09	Other disorders of plasma-protein metabolism, not	5	Y	C22.0, I81, D69.6, K74.60, E88.09
0200430	259943066	2015-11-04	2015-11-06	2	F17.210	Nicotine dependence, cigarettes, uncomplicated	6	Y	C22.0, I81, D69.6, K74.60, E88.09, F17.210
0200430	259943066	2015-11-04	2015-11-06	2	F10.21	Alcohol dependence, in remission	7	Y	C22.0, I81, D69.6, K74.60, E88.09, F17.210, F10.21
0200430	259943066	2015-11-04	2015-11-06	2	R59.0	Localized enlarged lymph nodes	8	Y	C22.0, I81, D69.6, K74.60, E88.09, F17.210, F10.21, R59.0
0200430	259943066	2015-11-04	2015-11-06	2	B19.20	Unspecified viral hepatitis C without hepatic coma	9	Y	C22.0, I81, D69.6, K74.60, E88.09, F17.210, F10.21, R59.0, B19.20
0200430	259943066	2015-11-04	2015-11-06	2	F10.20	Alcohol dependence, uncomplicated	10	Y	C22.0, I81, D69.6, K74.60, E88.09, F17.210, F10.21, R59.0, B19.20, F10.20
0200430	259943066	2015-11-04	2015-11-06	2	R63.4	Abnormal weight loss	11	Y	C22.0, I81, D69.6, K74.60, E88.09, F17.210, F10.21, R59.0, B19.20, F10.20, R63.4
0200430	259943066	2015-11-04	2015-11-06	2	R59.9	Enlarged lymph nodes, unspecified	12	Y	C22.0, I81, D69.6, K74.60, E88.09, F17.210, F10.21, R59.0, B19.20, F10.20, R63.4, R59.9
0200430	259943066	2015-11-04	2015-11-06	2	R19.7	Diarrhea, unspecified	13	Y	C22.0, I81, D69.6, K74.60, E88.09, F17.210, F10.21, R59.0, B19.20, F10.20, R63.4, R59.9, R19.7
0200430	259943066	2015-11-04	2015-11-06	2	R74.8	Abnormal levels of other serum enzymes	14	Y	C22.0, I81, D69.6, K74.60, E88.09, F17.210, F10.21, R59.0, B19.20, F10.20, R63.4, R59.9, R19.7, R74.8	Last
0203271	259617355	2015-10-24	2015-10-28	4	A41.51	Sepsis due to Escherichia coli E. coli	1	Y	A41.51
0203271	259617355	2015-10-24	2015-10-28	4	G93.41	Metabolic encephalopathy	2	Y	A41.51, G93.41
0203271	259617355	2015-10-24	2015-10-28	4	N17.9	Acute kidney failure, unspecified	3	Y	A41.51, G93.41, N17.9
0203271	259617355	2015-10-24	2015-10-28	4	I48.0	Paroxysmal atrial fibrillation	4	Y	A41.51, G93.41, N17.9, I48.0
0203271	259617355	2015-10-24	2015-10-28	4	I50.9	Heart failure, unspecified	5	Y	A41.51, G93.41, N17.9, I48.0, I50.9
0203271	259617355	2015-10-24	2015-10-28	4	E86.0	Dehydration	6	Y	A41.51, G93.41, N17.9, I48.0, I50.9, E86.0
0203271	259617355	2015-10-24	2015-10-28	4	E87.1	Hypo-osmolality and hyponatremia	7	Y	A41.51, G93.41, N17.9, I48.0, I50.9, E86.0, E87.1
0203271	259617355	2015-10-24	2015-10-28	4	E83.41	Hypermagnesemia	8	Y	A41.51, G93.41, N17.9, I48.0, I50.9, E86.0, E87.1, E83.41
0203271	259617355	2015-10-24	2015-10-28	4	N10	Acute tubulo-interstitial nephritis	9	Y	A41.51, G93.41, N17.9, I48.0, I50.9, E86.0, E87.1, E83.41, N10
0203271	259617355	2015-10-24	2015-10-28	4	J44.9	Chronic obstructive pulmonary disease, unspecified	10	Y	A41.51, G93.41, N17.9, I48.0, I50.9, E86.0, E87.1, E83.41, N10, J44.9
0203271	259617355	2015-10-24	2015-10-28	4	I12.9	Hypertensive chronic kidney disease with stage 1 t	11	Y	A41.51, G93.41, N17.9, I48.0, I50.9, E86.0, E87.1, E83.41, N10, J44.9, I12.9
0203271	259617355	2015-10-24	2015-10-28	4	N18.9	Chronic kidney disease, unspecified	12	Y	A41.51, G93.41, N17.9, I48.0, I50.9, E86.0, E87.1, E83.41, N10, J44.9, I12.9, N18.9
0203271	259617355	2015-10-24	2015-10-28	4	E78.5	Hyperlipidemia, unspecified	13	Y	A41.51, G93.41, N17.9, I48.0, I50.9, E86.0, E87.1, E83.41, N10, J44.9, I12.9, N18.9, E78.5
0203271	259617355	2015-10-24	2015-10-28	4	R65.20	Severe sepsis without septic shock	14	Y	A41.51, G93.41, N17.9, I48.0, I50.9, E86.0, E87.1, E83.41, N10, J44.9, I12.9, N18.9, E78.5, R65.20
0203271	259617355	2015-10-24	2015-10-28	4	N40.1	Enlarged prostate with lower urinary tract symptom	15	Y	A41.51, G93.41, N17.9, I48.0, I50.9, E86.0, E87.1, E83.41, N10, J44.9, I12.9, N18.9, E78.5, R65.20, N40.1
0203271	259617355	2015-10-24	2015-10-28	4	R33.8	Other retention of urine	16	Y	A41.51, G93.41, N17.9, I48.0, I50.9, E86.0, E87.1, E83.41, N10, J44.9, I12.9, N18.9, E78.5, R65.20, N40.1, R33.8
0203271	259617355	2015-10-24	2015-10-28	4	Z79.2	Long term (current) use of antibiotics	17		A41.51, G93.41, N17.9, I48.0, I50.9, E86.0, E87.1, E83.41, N10, J44.9, I12.9, N18.9, E78.5, R65.20, N40.1, R33.8, Z79.2
0203271	259617355	2015-10-24	2015-10-28	4	Z88.0	Allergy status to penicillin	18		A41.51, G93.41, N17.9, I48.0, I50.9, E86.0, E87.1, E83.41, N10, J44.9, I12.9, N18.9, E78.5, R65.20, N40.1, R33.8, Z79.2, Z88.0
0203271	259617355	2015-10-24	2015-10-28	4	Z88.8	Allergy status to other drugs, medicaments and bio	19		A41.51, G93.41, N17.9, I48.0, I50.9, E86.0, E87.1, E83.41, N10, J44.9, I12.9, N18.9, E78.5, R65.20, N40.1, R33.8, Z79.2, Z88.0, Z88.8
0203271	259617355	2015-10-24	2015-10-28	4	Z85.118	Personal history of other malignant neoplasm of br	20		A41.51, G93.41, N17.9, I48.0, I50.9, E86.0, E87.1, E83.41, N10, J44.9, I12.9, N18.9, E78.5, R65.20, N40.1, R33.8, Z79.2, Z88.0, Z88.8, Z85.118	Last
0203486	261265888	2015-12-22	2015-12-24	2	C22.1	Intrahepatic bile duct carcinoma	1	Y	C22.1
0203486	261265888	2015-12-22	2015-12-24	2	I48.91	Unspecified atrial fibrillation	2	Y	C22.1, I48.91
0203486	261265888	2015-12-22	2015-12-24	2	E78.5	Hyperlipidemia, unspecified	3	Y	C22.1, I48.91, E78.5
0203486	261265888	2015-12-22	2015-12-24	2	I10	Essential (primary) hypertension	4	Y	C22.1, I48.91, E78.5, I10
0203486	261265888	2015-12-22	2015-12-24	2	G89.29	Other chronic pain	5	Y	C22.1, I48.91, E78.5, I10, G89.29
0203486	261265888	2015-12-22	2015-12-24	2	N40.0	Enlarged prostate without lower urinary tract symp	6	Y	C22.1, I48.91, E78.5, I10, G89.29, N40.0
0203486	261265888	2015-12-22	2015-12-24	2	Z86.010	Personal history of colonic polyps	7		C22.1, I48.91, E78.5, I10, G89.29, N40.0, Z86.010
0203486	261265888	2015-12-22	2015-12-24	2	Z86.73	Personal history of transient ischemic attack (TIA	8		C22.1, I48.91, E78.5, I10, G89.29, N40.0, Z86.010, Z86.73
0203486	261265888	2015-12-22	2015-12-24	2	M17.0	Bilateral primary osteoarthritis of knee	9	Y	C22.1, I48.91, E78.5, I10, G89.29, N40.0, Z86.010, Z86.73, M17.0
0203486	261265888	2015-12-22	2015-12-24	2	Z79.01	Long term (current) use of anticoagulants	10		C22.1, I48.91, E78.5, I10, G89.29, N40.0, Z86.010, Z86.73, M17.0, Z79.01
0203486	261265888	2015-12-22	2015-12-24	2	M54.5	Low back pain	11	Y	C22.1, I48.91, E78.5, I10, G89.29, N40.0, Z86.010, Z86.73, M17.0, Z79.01, M54.5	Last
0205935	261589782	2016-01-06	2016-01-13	7	I63.522	Cerebral infarction due to unspecified occlusion o	1	Y	I63.522
0205935	261589782	2016-01-06	2016-01-13	7	E87.2	Acidosis	2	Y	I63.522, E87.2
0205935	261589782	2016-01-06	2016-01-13	7	M31.31	Wegeners granulomatosis with renal involvement	3	Y	I63.522, E87.2, M31.31
0205935	261589782	2016-01-06	2016-01-13	7	B37.81	Candidal esophagitis	4	Y	I63.522, E87.2, M31.31, B37.81
0205935	261589782	2016-01-06	2016-01-13	7	D47.9	Neoplasm of uncertain behavior of lymphoid, hemato	5	N	I63.522, E87.2, M31.31, B37.81, D47.9
0205935	261589782	2016-01-06	2016-01-13	7	E87.1	Hypo-osmolality and hyponatremia	6	N	I63.522, E87.2, M31.31, B37.81, D47.9, E87.1
0205935	261589782	2016-01-06	2016-01-13	7	G81.94	Hemiplegia, unspecified affecting left nondominant	7	Y	I63.522, E87.2, M31.31, B37.81, D47.9, E87.1, G81.94
0205935	261589782	2016-01-06	2016-01-13	7	Q04.8	Other specified congenital malformations of brain	8		I63.522, E87.2, M31.31, B37.81, D47.9, E87.1, G81.94, Q04.8
0205935	261589782	2016-01-06	2016-01-13	7	Z94.0	Kidney transplant status	9		I63.522, E87.2, M31.31, B37.81, D47.9, E87.1, G81.94, Q04.8, Z94.0
0205935	261589782	2016-01-06	2016-01-13	7	R47.01	Aphasia	10	Y	I63.522, E87.2, M31.31, B37.81, D47.9, E87.1, G81.94, Q04.8, Z94.0, R47.01
0205935	261589782	2016-01-06	2016-01-13	7	E11.65	Type 2 diabetes mellitus with hyperglycemia	11	Y	I63.522, E87.2, M31.31, B37.81, D47.9, E87.1, G81.94, Q04.8, Z94.0, R47.01, E11.65
0205935	261589782	2016-01-06	2016-01-13	7	M35.00	Sicca syndrome, unspecified	12	Y	I63.522, E87.2, M31.31, B37.81, D47.9, E87.1, G81.94, Q04.8, Z94.0, R47.01, E11.65, M35.00
0205935	261589782	2016-01-06	2016-01-13	7	D63.8	Anemia in other chronic diseases classified elsewh	13	Y	I63.522, E87.2, M31.31, B37.81, D47.9, E87.1, G81.94, Q04.8, Z94.0, R47.01, E11.65, M35.00, D63.8
0205935	261589782	2016-01-06	2016-01-13	7	R73.9	Hyperglycemia, unspecified	14	N	I63.522, E87.2, M31.31, B37.81, D47.9, E87.1, G81.94, Q04.8, Z94.0, R47.01, E11.65, M35.00, D63.8, R73.9
0205935	261589782	2016-01-06	2016-01-13	7	E83.42	Hypomagnesemia	15	N	I63.522, E87.2, M31.31, B37.81, D47.9, E87.1, G81.94, Q04.8, Z94.0, R47.01, E11.65, M35.00, D63.8, R73.9, E83.42
0205935	261589782	2016-01-06	2016-01-13	7	E83.39	Other disorders of phosphorus metabolism	16	N	I63.522, E87.2, M31.31, B37.81, D47.9, E87.1, G81.94, Q04.8, Z94.0, R47.01, E11.65, M35.00, D63.8, R73.9, E83.42, E83.39
0205935	261589782	2016-01-06	2016-01-13	7	E78.1	Pure hyperglyceridemia	17	Y	I63.522, E87.2, M31.31, B37.81, D47.9, E87.1, G81.94, Q04.8, Z94.0, R47.01, E11.65, M35.00, D63.8, R73.9, E83.42, E83.39, E78.1
0205935	261589782	2016-01-06	2016-01-13	7	I25.10	Atherosclerotic heart disease of native coronary a	18	Y	I63.522, E87.2, M31.31, B37.81, D47.9, E87.1, G81.94, Q04.8, Z94.0, R47.01, E11.65, M35.00, D63.8, R73.9, E83.42, E83.39, E78.1, I25.10
0205935	261589782	2016-01-06	2016-01-13	7	R47.1	Dysarthria and anarthria	19	Y	I63.522, E87.2, M31.31, B37.81, D47.9, E87.1, G81.94, Q04.8, Z94.0, R47.01, E11.65, M35.00, D63.8, R73.9, E83.42, E83.39, E78.1, I25.10, R47.1
0205935	261589782	2016-01-06	2016-01-13	7	E87.5	Hyperkalemia	20	N	I63.522, E87.2, M31.31, B37.81, D47.9, E87.1, G81.94, Q04.8, Z94.0, R47.01, E11.65, M35.00, D63.8, R73.9, E83.42, E83.39, E78.1, I25.10, R47.1, E87.5
0205935	261589782	2016-01-06	2016-01-13	7	I12.9	Hypertensive chronic kidney disease with stage 1 t	21	Y	I63.522, E87.2, M31.31, B37.81, D47.9, E87.1, G81.94, Q04.8, Z94.0, R47.01, E11.65, M35.00, D63.8, R73.9, E83.42, E83.39, E78.1, I25.10, R47.1, E87.5, I12.9
0205935	261589782	2016-01-06	2016-01-13	7	N18.2	Chronic kidney disease, stage 2 (mild)	22	Y	I63.522, E87.2, M31.31, B37.81, D47.9, E87.1, G81.94, Q04.8, Z94.0, R47.01, E11.65, M35.00, D63.8, R73.9, E83.42, E83.39, E78.1, I25.10, R47.1, E87.5, I12.9, N18.2
0205935	261589782	2016-01-06	2016-01-13	7	Z95.1	Presence of aortocoronary bypass graft	23		I63.522, E87.2, M31.31, B37.81, D47.9, E87.1, G81.94, Q04.8, Z94.0, R47.01, E11.65, M35.00, D63.8, R73.9, E83.42, E83.39, E78.1, I25.10, R47.1, E87.5, I12.9, N18.2, Z95.1
0205935	261589782	2016-01-06	2016-01-13	7	Z85.828	Personal history of other malignant neoplasm of sk	24		I63.522, E87.2, M31.31, B37.81, D47.9, E87.1, G81.94, Q04.8, Z94.0, R47.01, E11.65, M35.00, D63.8, R73.9, E83.42, E83.39, E78.1, I25.10, R47.1, E87.5, I12.9, N18.2, Z95.1, Z85.828	Last
0206954	262912645	2016-02-21	2016-03-11	19	A41.9	Sepsis, unspecified organism	1	Y	A41.9
0206954	262912645	2016-02-21	2016-03-11	19	N17.0	Acute kidney failure with tubular necrosis	2	Y	A41.9, N17.0
0206954	262912645	2016-02-21	2016-03-11	19	J96.01	Acute respiratory failure with hypoxia	3	N	A41.9, N17.0, J96.01
0206954	262912645	2016-02-21	2016-03-11	19	E87.0	Hyperosmolality and hypernatremia	4	Y	A41.9, N17.0, J96.01, E87.0
0206954	262912645	2016-02-21	2016-03-11	19	E87.4	Mixed disorder of acid-base balance	5	Y	A41.9, N17.0, J96.01, E87.0, E87.4
0206954	262912645	2016-02-21	2016-03-11	19	J81.1	Chronic pulmonary edema	6	N	A41.9, N17.0, J96.01, E87.0, E87.4, J81.1
0206954	262912645	2016-02-21	2016-03-11	19	J18.9	Pneumonia, unspecified organism	7	N	A41.9, N17.0, J96.01, E87.0, E87.4, J81.1, J18.9
0206954	262912645	2016-02-21	2016-03-11	19	M62.82	Rhabdomyolysis	8	Y	A41.9, N17.0, J96.01, E87.0, E87.4, J81.1, J18.9, M62.82
0206954	262912645	2016-02-21	2016-03-11	19	T68.XXXA	Hypothermia, initial encounter	9	Y	A41.9, N17.0, J96.01, E87.0, E87.4, J81.1, J18.9, M62.82, T68.XXXA
0206954	262912645	2016-02-21	2016-03-11	19	E83.51	Hypocalcemia	10	Y	A41.9, N17.0, J96.01, E87.0, E87.4, J81.1, J18.9, M62.82, T68.XXXA, E83.51
0206954	262912645	2016-02-21	2016-03-11	19	R65.20	Severe sepsis without septic shock	11	Y	A41.9, N17.0, J96.01, E87.0, E87.4, J81.1, J18.9, M62.82, T68.XXXA, E83.51, R65.20
0206954	262912645	2016-02-21	2016-03-11	19	F25.9	Schizoaffective disorder, unspecified	12	Y	A41.9, N17.0, J96.01, E87.0, E87.4, J81.1, J18.9, M62.82, T68.XXXA, E83.51, R65.20, F25.9
0206954	262912645	2016-02-21	2016-03-11	19	Z91.19	Patients noncompliance with other medical treatmen	13	Y	A41.9, N17.0, J96.01, E87.0, E87.4, J81.1, J18.9, M62.82, T68.XXXA, E83.51, R65.20, F25.9, Z91.19
0206954	262912645	2016-02-21	2016-03-11	19	K21.9	Gastro-esophageal reflux disease without esophagit	14	Y	A41.9, N17.0, J96.01, E87.0, E87.4, J81.1, J18.9, M62.82, T68.XXXA, E83.51, R65.20, F25.9, Z91.19, K21.9
0206954	262912645	2016-02-21	2016-03-11	19	E86.0	Dehydration	15	Y	A41.9, N17.0, J96.01, E87.0, E87.4, J81.1, J18.9, M62.82, T68.XXXA, E83.51, R65.20, F25.9, Z91.19, K21.9, E86.0
0206954	262912645	2016-02-21	2016-03-11	19	E83.39	Other disorders of phosphorus metabolism	16	N	A41.9, N17.0, J96.01, E87.0, E87.4, J81.1, J18.9, M62.82, T68.XXXA, E83.51, R65.20, F25.9, Z91.19, K21.9, E86.0, E83.39
0206954	262912645	2016-02-21	2016-03-11	19	I10	Essential (primary) hypertension	17	Y	A41.9, N17.0, J96.01, E87.0, E87.4, J81.1, J18.9, M62.82, T68.XXXA, E83.51, R65.20, F25.9, Z91.19, K21.9, E86.0, E83.39, I10
0206954	262912645	2016-02-21	2016-03-11	19	Y95	Nosocomial condition	18	N	A41.9, N17.0, J96.01, E87.0, E87.4, J81.1, J18.9, M62.82, T68.XXXA, E83.51, R65.20, F25.9, Z91.19, K21.9, E86.0, E83.39, I10, Y95	Last
0209492	263552929	2016-03-12	2016-03-24	12	N10	Acute tubulo-interstitial nephritis	1	Y	N10
0209492	263552929	2016-03-12	2016-03-24	12	N17.9	Acute kidney failure, unspecified	2	Y	N10, N17.9
0209492	263552929	2016-03-12	2016-03-24	12	N13.2	Hydronephrosis with renal and ureteral calculous o	3	Y	N10, N17.9, N13.2
0209492	263552929	2016-03-12	2016-03-24	12	D86.9	Sarcoidosis, unspecified	4	Y	N10, N17.9, N13.2, D86.9
0209492	263552929	2016-03-12	2016-03-24	12	D62	Acute posthemorrhagic anemia	5	N	N10, N17.9, N13.2, D86.9, D62
0209492	263552929	2016-03-12	2016-03-24	12	N30.91	Cystitis, unspecified with hematuria	6	Y	N10, N17.9, N13.2, D86.9, D62, N30.91
0209492	263552929	2016-03-12	2016-03-24	12	R31.0	Gross hematuria	7	Y	N10, N17.9, N13.2, D86.9, D62, N30.91, R31.0
0209492	263552929	2016-03-12	2016-03-24	12	N13.6	Pyonephrosis	8	Y	N10, N17.9, N13.2, D86.9, D62, N30.91, R31.0, N13.6
0209492	263552929	2016-03-12	2016-03-24	12	Z95.2	Presence of prosthetic heart valve	9		N10, N17.9, N13.2, D86.9, D62, N30.91, R31.0, N13.6, Z95.2
0209492	263552929	2016-03-12	2016-03-24	12	D64.9	Anemia, unspecified	10	Y	N10, N17.9, N13.2, D86.9, D62, N30.91, R31.0, N13.6, Z95.2, D64.9
0209492	263552929	2016-03-12	2016-03-24	12	K21.9	Gastro-esophageal reflux disease without esophagit	11	Y	N10, N17.9, N13.2, D86.9, D62, N30.91, R31.0, N13.6, Z95.2, D64.9, K21.9
0209492	263552929	2016-03-12	2016-03-24	12	G47.33	Obstructive sleep apnea (adult) (pediatric)	12	Y	N10, N17.9, N13.2, D86.9, D62, N30.91, R31.0, N13.6, Z95.2, D64.9, K21.9, G47.33
0209492	263552929	2016-03-12	2016-03-24	12	I10	Essential (primary) hypertension	13	Y	N10, N17.9, N13.2, D86.9, D62, N30.91, R31.0, N13.6, Z95.2, D64.9, K21.9, G47.33, I10
0209492	263552929	2016-03-12	2016-03-24	12	Z79.01	Long term (current) use of anticoagulants	14		N10, N17.9, N13.2, D86.9, D62, N30.91, R31.0, N13.6, Z95.2, D64.9, K21.9, G47.33, I10, Z79.01	Last
0210068	263057135	2016-02-25	2016-03-04	8	A41.9	Sepsis, unspecified organism	1	Y	A41.9
0210068	263057135	2016-02-25	2016-03-04	8	J69.0	Pneumonitis due to inhalation of food and vomit	2	Y	A41.9, J69.0
0210068	263057135	2016-02-25	2016-03-04	8	R65.21	Severe sepsis with septic shock	3	Y	A41.9, J69.0, R65.21
0210068	263057135	2016-02-25	2016-03-04	8	G82.50	Quadriplegia, unspecified	4	Y	A41.9, J69.0, R65.21, G82.50
0210068	263057135	2016-02-25	2016-03-04	8	L89.152	Pressure ulcer of sacral region, stage 2	5	Y	A41.9, J69.0, R65.21, G82.50, L89.152
0210068	263057135	2016-02-25	2016-03-04	8	R47.01	Aphasia	6	Y	A41.9, J69.0, R65.21, G82.50, L89.152, R47.01
0210068	263057135	2016-02-25	2016-03-04	8	L03.211	Cellulitis of face	7	Y	A41.9, J69.0, R65.21, G82.50, L89.152, R47.01, L03.211
0210068	263057135	2016-02-25	2016-03-04	8	K21.9	Gastro-esophageal reflux disease without esophagit	8	Y	A41.9, J69.0, R65.21, G82.50, L89.152, R47.01, L03.211, K21.9
0210068	263057135	2016-02-25	2016-03-04	8	I10	Essential (primary) hypertension	9	Y	A41.9, J69.0, R65.21, G82.50, L89.152, R47.01, L03.211, K21.9, I10
0210068	263057135	2016-02-25	2016-03-04	8	G89.29	Other chronic pain	10	Y	A41.9, J69.0, R65.21, G82.50, L89.152, R47.01, L03.211, K21.9, I10, G89.29
0210068	263057135	2016-02-25	2016-03-04	8	Z66	Do not resuscitate	11	Y	A41.9, J69.0, R65.21, G82.50, L89.152, R47.01, L03.211, K21.9, I10, G89.29, Z66
0210068	263057135	2016-02-25	2016-03-04	8	H10.89	Other conjunctivitis	12	Y	A41.9, J69.0, R65.21, G82.50, L89.152, R47.01, L03.211, K21.9, I10, G89.29, Z66, H10.89
0210068	263057135	2016-02-25	2016-03-04	8	H05.20	Unspecified exophthalmos	13	Y	A41.9, J69.0, R65.21, G82.50, L89.152, R47.01, L03.211, K21.9, I10, G89.29, Z66, H10.89, H05.20
0210068	263057135	2016-02-25	2016-03-04	8	F32.9	Major depressive disorder, single episode, unspeci	14	Y	A41.9, J69.0, R65.21, G82.50, L89.152, R47.01, L03.211, K21.9, I10, G89.29, Z66, H10.89, H05.20, F32.9
0210068	263057135	2016-02-25	2016-03-04	8	Z86.718	Personal history of other venous thrombosis and em	15		A41.9, J69.0, R65.21, G82.50, L89.152, R47.01, L03.211, K21.9, I10, G89.29, Z66, H10.89, H05.20, F32.9, Z86.718
0210068	263057135	2016-02-25	2016-03-04	8	Z93.1	Gastrostomy status	16		A41.9, J69.0, R65.21, G82.50, L89.152, R47.01, L03.211, K21.9, I10, G89.29, Z66, H10.89, H05.20, F32.9, Z86.718, Z93.1
0210068	263057135	2016-02-25	2016-03-04	8	Z87.891	Personal history of nicotine dependence	17		A41.9, J69.0, R65.21, G82.50, L89.152, R47.01, L03.211, K21.9, I10, G89.29, Z66, H10.89, H05.20, F32.9, Z86.718, Z93.1, Z87.891
0210068	263057135	2016-02-25	2016-03-04	8	Z79.01	Long term (current) use of anticoagulants	18		A41.9, J69.0, R65.21, G82.50, L89.152, R47.01, L03.211, K21.9, I10, G89.29, Z66, H10.89, H05.20, F32.9, Z86.718, Z93.1, Z87.891, Z79.01
0210068	263057135	2016-02-25	2016-03-04	8	Z86.711	Personal history of pulmonary embolism	19		A41.9, J69.0, R65.21, G82.50, L89.152, R47.01, L03.211, K21.9, I10, G89.29, Z66, H10.89, H05.20, F32.9, Z86.718, Z93.1, Z87.891, Z79.01, Z86.711
0210068	263057135	2016-02-25	2016-03-04	8	Z51.5	Encounter for palliative care	20		A41.9, J69.0, R65.21, G82.50, L89.152, R47.01, L03.211, K21.9, I10, G89.29, Z66, H10.89, H05.20, F32.9, Z86.718, Z93.1, Z87.891, Z79.01, Z86.711, Z51.5	Last
0210068	263371460	2016-03-07	2016-03-17	10	A41.02	Sepsis due to Methicillin resistant Staphylococcus	1	Y	A41.02
0210068	263371460	2016-03-07	2016-03-17	10	N17.0	Acute kidney failure with tubular necrosis	2	N	A41.02, N17.0
0210068	263371460	2016-03-07	2016-03-17	10	J96.01	Acute respiratory failure with hypoxia	3	Y	A41.02, N17.0, J96.01
0210068	263371460	2016-03-07	2016-03-17	10	G82.50	Quadriplegia, unspecified	4	Y	A41.02, N17.0, J96.01, G82.50
0210068	263371460	2016-03-07	2016-03-17	10	J15.212	Pneumonia due to Methicillin resistant Staphylococ	5	Y	A41.02, N17.0, J96.01, G82.50, J15.212
0210068	263371460	2016-03-07	2016-03-17	10	L89.152	Pressure ulcer of sacral region, stage 2	6	Y	A41.02, N17.0, J96.01, G82.50, J15.212, L89.152
0210068	263371460	2016-03-07	2016-03-17	10	Z66	Do not resuscitate	7	Y	A41.02, N17.0, J96.01, G82.50, J15.212, L89.152, Z66
0210068	263371460	2016-03-07	2016-03-17	10	R13.10	Dysphagia, unspecified	8	Y	A41.02, N17.0, J96.01, G82.50, J15.212, L89.152, Z66, R13.10
0210068	263371460	2016-03-07	2016-03-17	10	R65.20	Severe sepsis without septic shock	9	Y	A41.02, N17.0, J96.01, G82.50, J15.212, L89.152, Z66, R13.10, R65.20
0210068	263371460	2016-03-07	2016-03-17	10	Y95	Nosocomial condition	10	Y	A41.02, N17.0, J96.01, G82.50, J15.212, L89.152, Z66, R13.10, R65.20, Y95
0210068	263371460	2016-03-07	2016-03-17	10	E87.6	Hypokalemia	11	N	A41.02, N17.0, J96.01, G82.50, J15.212, L89.152, Z66, R13.10, R65.20, Y95, E87.6
0210068	263371460	2016-03-07	2016-03-17	10	I10	Essential (primary) hypertension	12	Y	A41.02, N17.0, J96.01, G82.50, J15.212, L89.152, Z66, R13.10, R65.20, Y95, E87.6, I10
0210068	263371460	2016-03-07	2016-03-17	10	H10.9	Unspecified conjunctivitis	13	Y	A41.02, N17.0, J96.01, G82.50, J15.212, L89.152, Z66, R13.10, R65.20, Y95, E87.6, I10, H10.9
0210068	263371460	2016-03-07	2016-03-17	10	R19.7	Diarrhea, unspecified	14	N	A41.02, N17.0, J96.01, G82.50, J15.212, L89.152, Z66, R13.10, R65.20, Y95, E87.6, I10, H10.9, R19.7
0210068	263371460	2016-03-07	2016-03-17	10	Y92.239	Unspecified place in hospital as the place of occu	15		A41.02, N17.0, J96.01, G82.50, J15.212, L89.152, Z66, R13.10, R65.20, Y95, E87.6, I10, H10.9, R19.7, Y92.239
0210068	263371460	2016-03-07	2016-03-17	10	T36.8X5A	Adverse effect of other systemic antibiotics, init	16	N	A41.02, N17.0, J96.01, G82.50, J15.212, L89.152, Z66, R13.10, R65.20, Y95, E87.6, I10, H10.9, R19.7, Y92.239, T36.8X5A
0210068	263371460	2016-03-07	2016-03-17	10	D64.9	Anemia, unspecified	17	Y	A41.02, N17.0, J96.01, G82.50, J15.212, L89.152, Z66, R13.10, R65.20, Y95, E87.6, I10, H10.9, R19.7, Y92.239, T36.8X5A, D64.9
0210068	263371460	2016-03-07	2016-03-17	10	Z93.1	Gastrostomy status	18		A41.02, N17.0, J96.01, G82.50, J15.212, L89.152, Z66, R13.10, R65.20, Y95, E87.6, I10, H10.9, R19.7, Y92.239, T36.8X5A, D64.9, Z93.1
0210068	263371460	2016-03-07	2016-03-17	10	I69.320	Aphasia following cerebral infarction	19		A41.02, N17.0, J96.01, G82.50, J15.212, L89.152, Z66, R13.10, R65.20, Y95, E87.6, I10, H10.9, R19.7, Y92.239, T36.8X5A, D64.9, Z93.1, I69.320
0210068	263371460	2016-03-07	2016-03-17	10	I69.365	Other paralytic syndrome following cerebral infarc	20		A41.02, N17.0, J96.01, G82.50, J15.212, L89.152, Z66, R13.10, R65.20, Y95, E87.6, I10, H10.9, R19.7, Y92.239, T36.8X5A, D64.9, Z93.1, I69.320, I69.365
0210068	263371460	2016-03-07	2016-03-17	10	Z86.711	Personal history of pulmonary embolism	21		A41.02, N17.0, J96.01, G82.50, J15.212, L89.152, Z66, R13.10, R65.20, Y95, E87.6, I10, H10.9, R19.7, Y92.239, T36.8X5A, D64.9, Z93.1, I69.320, I69.365, Z86.711
0210068	263371460	2016-03-07	2016-03-17	10	Z86.718	Personal history of other venous thrombosis and em	22		A41.02, N17.0, J96.01, G82.50, J15.212, L89.152, Z66, R13.10, R65.20, Y95, E87.6, I10, H10.9, R19.7, Y92.239, T36.8X5A, D64.9, Z93.1, I69.320, I69.365, Z86.711, Z86.718
0210068	263371460	2016-03-07	2016-03-17	10	Z79.01	Long term (current) use of anticoagulants	23		A41.02, N17.0, J96.01, G82.50, J15.212, L89.152, Z66, R13.10, R65.20, Y95, E87.6, I10, H10.9, R19.7, Y92.239, T36.8X5A, D64.9, Z93.1, I69.320, I69.365, Z86.711, Z86.718, Z79.01	Last
0213185	258847755	2015-09-28	2015-10-13	15	A41.51	Sepsis due to Escherichia coli E. coli	1	Y	A41.51
0213185	258847755	2015-09-28	2015-10-13	15	N17.0	Acute kidney failure with tubular necrosis	2	Y	A41.51, N17.0
0213185	258847755	2015-09-28	2015-10-13	15	R65.21	Severe sepsis with septic shock	3	Y	A41.51, N17.0, R65.21
0213185	258847755	2015-09-28	2015-10-13	15	G92	Toxic encephalopathy	4	N	A41.51, N17.0, R65.21, G92
0213185	258847755	2015-09-28	2015-10-13	15	D61.810	Antineoplastic chemotherapy induced pancytopenia	5	Y	A41.51, N17.0, R65.21, G92, D61.810
0213185	258847755	2015-09-28	2015-10-13	15	C90.02	Multiple myeloma in relapse	6	Y	A41.51, N17.0, R65.21, G92, D61.810, C90.02
0213185	258847755	2015-09-28	2015-10-13	15	D47.2	Monoclonal gammopathy	7	Y	A41.51, N17.0, R65.21, G92, D61.810, C90.02, D47.2
0213185	258847755	2015-09-28	2015-10-13	15	D69.59	Other secondary thrombocytopenia	8	Y	A41.51, N17.0, R65.21, G92, D61.810, C90.02, D47.2, D69.59
0213185	258847755	2015-09-28	2015-10-13	15	N18.3	Chronic kidney disease, stage 3 (moderate)	9	Y	A41.51, N17.0, R65.21, G92, D61.810, C90.02, D47.2, D69.59, N18.3
0213185	258847755	2015-09-28	2015-10-13	15	Z66	Do not resuscitate	10	N	A41.51, N17.0, R65.21, G92, D61.810, C90.02, D47.2, D69.59, N18.3, Z66
0213185	258847755	2015-09-28	2015-10-13	15	Z51.5	Encounter for palliative care	11		A41.51, N17.0, R65.21, G92, D61.810, C90.02, D47.2, D69.59, N18.3, Z66, Z51.5
0213185	258847755	2015-09-28	2015-10-13	15	E87.4	Mixed disorder of acid-base balance	12	Y	A41.51, N17.0, R65.21, G92, D61.810, C90.02, D47.2, D69.59, N18.3, Z66, Z51.5, E87.4
0213185	258847755	2015-09-28	2015-10-13	15	D68.9	Coagulation defect, unspecified	13	Y	A41.51, N17.0, R65.21, G92, D61.810, C90.02, D47.2, D69.59, N18.3, Z66, Z51.5, E87.4, D68.9
0213185	258847755	2015-09-28	2015-10-13	15	Z94.84	Stem cells transplant status	14		A41.51, N17.0, R65.21, G92, D61.810, C90.02, D47.2, D69.59, N18.3, Z66, Z51.5, E87.4, D68.9, Z94.84
0213185	258847755	2015-09-28	2015-10-13	15	Z94.81	Bone marrow transplant status	15		A41.51, N17.0, R65.21, G92, D61.810, C90.02, D47.2, D69.59, N18.3, Z66, Z51.5, E87.4, D68.9, Z94.84, Z94.81
0213185	258847755	2015-09-28	2015-10-13	15	D70.9	Neutropenia, unspecified	16	Y	A41.51, N17.0, R65.21, G92, D61.810, C90.02, D47.2, D69.59, N18.3, Z66, Z51.5, E87.4, D68.9, Z94.84, Z94.81, D70.9
0213185	258847755	2015-09-28	2015-10-13	15	B99.9	Unspecified infectious disease	17	Y	A41.51, N17.0, R65.21, G92, D61.810, C90.02, D47.2, D69.59, N18.3, Z66, Z51.5, E87.4, D68.9, Z94.84, Z94.81, D70.9, B99.9
0213185	258847755	2015-09-28	2015-10-13	15	I12.9	Hypertensive chronic kidney disease with stage 1 t	18	Y	A41.51, N17.0, R65.21, G92, D61.810, C90.02, D47.2, D69.59, N18.3, Z66, Z51.5, E87.4, D68.9, Z94.84, Z94.81, D70.9, B99.9, I12.9
0213185	258847755	2015-09-28	2015-10-13	15	R50.81	Fever presenting with conditions classified elsewh	19	Y	A41.51, N17.0, R65.21, G92, D61.810, C90.02, D47.2, D69.59, N18.3, Z66, Z51.5, E87.4, D68.9, Z94.84, Z94.81, D70.9, B99.9, I12.9, R50.81
0213185	258847755	2015-09-28	2015-10-13	15	E78.5	Hyperlipidemia, unspecified	20	Y	A41.51, N17.0, R65.21, G92, D61.810, C90.02, D47.2, D69.59, N18.3, Z66, Z51.5, E87.4, D68.9, Z94.84, Z94.81, D70.9, B99.9, I12.9, R50.81, E78.5
0213185	258847755	2015-09-28	2015-10-13	15	H02.402	Unspecified ptosis of left eyelid	21	Y	A41.51, N17.0, R65.21, G92, D61.810, C90.02, D47.2, D69.59, N18.3, Z66, Z51.5, E87.4, D68.9, Z94.84, Z94.81, D70.9, B99.9, I12.9, R50.81, E78.5, H02.402
0213185	258847755	2015-09-28	2015-10-13	15	H53.2	Diplopia	22	Y	A41.51, N17.0, R65.21, G92, D61.810, C90.02, D47.2, D69.59, N18.3, Z66, Z51.5, E87.4, D68.9, Z94.84, Z94.81, D70.9, B99.9, I12.9, R50.81, E78.5, H02.402, H53.2
0213185	258847755	2015-09-28	2015-10-13	15	E83.39	Other disorders of phosphorus metabolism	23	Y	A41.51, N17.0, R65.21, G92, D61.810, C90.02, D47.2, D69.59, N18.3, Z66, Z51.5, E87.4, D68.9, Z94.84, Z94.81, D70.9, B99.9, I12.9, R50.81, E78.5, H02.402, H53.2, E83.39
0213185	258847755	2015-09-28	2015-10-13	15	E83.51	Hypocalcemia	24	Y	A41.51, N17.0, R65.21, G92, D61.810, C90.02, D47.2, D69.59, N18.3, Z66, Z51.5, E87.4, D68.9, Z94.84, Z94.81, D70.9, B99.9, I12.9, R50.81, E78.5, H02.402, H53.2, E83.39, E83.51
0213185	258847755	2015-09-28	2015-10-13	15	E83.42	Hypomagnesemia	25	Y	A41.51, N17.0, R65.21, G92, D61.810, C90.02, D47.2, D69.59, N18.3, Z66, Z51.5, E87.4, D68.9, Z94.84, Z94.81, D70.9, B99.9, I12.9, R50.81, E78.5, H02.402, H53.2, E83.39, E83.51, E83.42
0213185	258847755	2015-09-28	2015-10-13	15	E11.65	Type 2 diabetes mellitus with hyperglycemia	26	Y	A41.51, N17.0, R65.21, G92, D61.810, C90.02, D47.2, D69.59, N18.3, Z66, Z51.5, E87.4, D68.9, Z94.84, Z94.81, D70.9, B99.9, I12.9, R50.81, E78.5, H02.402, H53.2, E83.39, E83.51, E83.42, E11.65
0213185	258847755	2015-09-28	2015-10-13	15	H49.32	Total (external) ophthalmoplegia, left eye	27	Y	A41.51, N17.0, R65.21, G92, D61.810, C90.02, D47.2, D69.59, N18.3, Z66, Z51.5, E87.4, D68.9, Z94.84, Z94.81, D70.9, B99.9, I12.9, R50.81, E78.5, H02.402, H53.2, E83.39, E83.51, E83.42, E11.65, H49.32
0213185	258847755	2015-09-28	2015-10-13	15	Z99.2	Dependence on renal dialysis	28		A41.51, N17.0, R65.21, G92, D61.810, C90.02, D47.2, D69.59, N18.3, Z66, Z51.5, E87.4, D68.9, Z94.84, Z94.81, D70.9, B99.9, I12.9, R50.81, E78.5, H02.402, H53.2, E83.39, E83.51, E83.42, E11.65, H49.32, Z99.2
0213185	258847755	2015-09-28	2015-10-13	15	T45.1X5A	Adverse effect of antineoplastic and immunosuppres	29	Y	A41.51, N17.0, R65.21, G92, D61.810, C90.02, D47.2, D69.59, N18.3, Z66, Z51.5, E87.4, D68.9, Z94.84, Z94.81, D70.9, B99.9, I12.9, R50.81, E78.5, H02.402, H53.2, E83.39, E83.51, E83.42, E11.65, H49.32, Z99.2, T45.1X5A	Last
0214827	258729458	2015-09-23	2015-10-07	14	J69.0	Pneumonitis due to inhalation of food and vomit	1	Y	J69.0
0214827	258729458	2015-09-23	2015-10-07	14	J96.01	Acute respiratory failure with hypoxia	2	Y	J69.0, J96.01
0214827	258729458	2015-09-23	2015-10-07	14	I50.33	Acute on chronic diastolic (congestive) heart fail	3	Y	J69.0, J96.01, I50.33
0214827	258729458	2015-09-23	2015-10-07	14	E46	Unspecified protein-calorie malnutrition	4	Y	J69.0, J96.01, I50.33, E46
0214827	258729458	2015-09-23	2015-10-07	14	J38.01	Paralysis of vocal cords and larynx, unilateral	5	Y	J69.0, J96.01, I50.33, E46, J38.01
0214827	258729458	2015-09-23	2015-10-07	14	I27.2	Other secondary pulmonary hypertension	6	Y	J69.0, J96.01, I50.33, E46, J38.01, I27.2
0214827	258729458	2015-09-23	2015-10-07	14	R04.2	Hemoptysis	7	Y	J69.0, J96.01, I50.33, E46, J38.01, I27.2, R04.2
0214827	258729458	2015-09-23	2015-10-07	14	I48.2	Chronic atrial fibrillation	8	Y	J69.0, J96.01, I50.33, E46, J38.01, I27.2, R04.2, I48.2
0214827	258729458	2015-09-23	2015-10-07	14	R62.7	Adult failure to thrive	9	Y	J69.0, J96.01, I50.33, E46, J38.01, I27.2, R04.2, I48.2, R62.7
0214827	258729458	2015-09-23	2015-10-07	14	I07.1	Rheumatic tricuspid insufficiency	10	Y	J69.0, J96.01, I50.33, E46, J38.01, I27.2, R04.2, I48.2, R62.7, I07.1
0214827	258729458	2015-09-23	2015-10-07	14	Z79.01	Long term (current) use of anticoagulants	11		J69.0, J96.01, I50.33, E46, J38.01, I27.2, R04.2, I48.2, R62.7, I07.1, Z79.01
0214827	258729458	2015-09-23	2015-10-07	14	G47.33	Obstructive sleep apnea (adult) (pediatric)	12	Y	J69.0, J96.01, I50.33, E46, J38.01, I27.2, R04.2, I48.2, R62.7, I07.1, Z79.01, G47.33
0214827	258729458	2015-09-23	2015-10-07	14	K21.9	Gastro-esophageal reflux disease without esophagit	13	Y	J69.0, J96.01, I50.33, E46, J38.01, I27.2, R04.2, I48.2, R62.7, I07.1, Z79.01, G47.33, K21.9
0214827	258729458	2015-09-23	2015-10-07	14	D64.9	Anemia, unspecified	14	Y	J69.0, J96.01, I50.33, E46, J38.01, I27.2, R04.2, I48.2, R62.7, I07.1, Z79.01, G47.33, K21.9, D64.9
0214827	258729458	2015-09-23	2015-10-07	14	K44.9	Diaphragmatic hernia without obstruction or gangre	15	Y	J69.0, J96.01, I50.33, E46, J38.01, I27.2, R04.2, I48.2, R62.7, I07.1, Z79.01, G47.33, K21.9, D64.9, K44.9
0214827	258729458	2015-09-23	2015-10-07	14	D50.9	Iron deficiency anemia, unspecified	16	Y	J69.0, J96.01, I50.33, E46, J38.01, I27.2, R04.2, I48.2, R62.7, I07.1, Z79.01, G47.33, K21.9, D64.9, K44.9, D50.9
0214827	258729458	2015-09-23	2015-10-07	14	R13.10	Dysphagia, unspecified	17	Y	J69.0, J96.01, I50.33, E46, J38.01, I27.2, R04.2, I48.2, R62.7, I07.1, Z79.01, G47.33, K21.9, D64.9, K44.9, D50.9, R13.10	Last
0214827	259241479	2015-10-12	2015-10-25	13	J18.9	Pneumonia, unspecified organism	1	Y	J18.9
0214827	259241479	2015-10-12	2015-10-25	13	J96.21	Acute and chronic respiratory failure with hypoxia	2	Y	J18.9, J96.21
0214827	259241479	2015-10-12	2015-10-25	13	D65	Disseminated intravascular coagulation defibrinati	3	Y	J18.9, J96.21, D65
0214827	259241479	2015-10-12	2015-10-25	13	I50.33	Acute on chronic diastolic (congestive) heart fail	4	Y	J18.9, J96.21, D65, I50.33
0214827	259241479	2015-10-12	2015-10-25	13	N17.9	Acute kidney failure, unspecified	5	Y	J18.9, J96.21, D65, I50.33, N17.9
0214827	259241479	2015-10-12	2015-10-25	13	E87.2	Acidosis	6	Y	J18.9, J96.21, D65, I50.33, N17.9, E87.2
0214827	259241479	2015-10-12	2015-10-25	13	J38.00	Paralysis of vocal cords and larynx, unspecified	7	Y	J18.9, J96.21, D65, I50.33, N17.9, E87.2, J38.00
0214827	259241479	2015-10-12	2015-10-25	13	E87.3	Alkalosis	8	N	J18.9, J96.21, D65, I50.33, N17.9, E87.2, J38.00, E87.3
0214827	259241479	2015-10-12	2015-10-25	13	R04.2	Hemoptysis	9	Y	J18.9, J96.21, D65, I50.33, N17.9, E87.2, J38.00, E87.3, R04.2
0214827	259241479	2015-10-12	2015-10-25	13	Z66	Do not resuscitate	10	N	J18.9, J96.21, D65, I50.33, N17.9, E87.2, J38.00, E87.3, R04.2, Z66
0214827	259241479	2015-10-12	2015-10-25	13	Z51.5	Encounter for palliative care	11		J18.9, J96.21, D65, I50.33, N17.9, E87.2, J38.00, E87.3, R04.2, Z66, Z51.5
0214827	259241479	2015-10-12	2015-10-25	13	J69.0	Pneumonitis due to inhalation of food and vomit	12	Y	J18.9, J96.21, D65, I50.33, N17.9, E87.2, J38.00, E87.3, R04.2, Z66, Z51.5, J69.0
0214827	259241479	2015-10-12	2015-10-25	13	I27.2	Other secondary pulmonary hypertension	13	Y	J18.9, J96.21, D65, I50.33, N17.9, E87.2, J38.00, E87.3, R04.2, Z66, Z51.5, J69.0, I27.2
0214827	259241479	2015-10-12	2015-10-25	13	J44.9	Chronic obstructive pulmonary disease, unspecified	14	Y	J18.9, J96.21, D65, I50.33, N17.9, E87.2, J38.00, E87.3, R04.2, Z66, Z51.5, J69.0, I27.2, J44.9
0214827	259241479	2015-10-12	2015-10-25	13	I48.91	Unspecified atrial fibrillation	15	Y	J18.9, J96.21, D65, I50.33, N17.9, E87.2, J38.00, E87.3, R04.2, Z66, Z51.5, J69.0, I27.2, J44.9, I48.91
0214827	259241479	2015-10-12	2015-10-25	13	Z93.1	Gastrostomy status	16		J18.9, J96.21, D65, I50.33, N17.9, E87.2, J38.00, E87.3, R04.2, Z66, Z51.5, J69.0, I27.2, J44.9, I48.91, Z93.1
0214827	259241479	2015-10-12	2015-10-25	13	D53.9	Nutritional anemia, unspecified	17	N	J18.9, J96.21, D65, I50.33, N17.9, E87.2, J38.00, E87.3, R04.2, Z66, Z51.5, J69.0, I27.2, J44.9, I48.91, Z93.1, D53.9
0214827	259241479	2015-10-12	2015-10-25	13	Y95	Nosocomial condition	18	Y	J18.9, J96.21, D65, I50.33, N17.9, E87.2, J38.00, E87.3, R04.2, Z66, Z51.5, J69.0, I27.2, J44.9, I48.91, Z93.1, D53.9, Y95
0214827	259241479	2015-10-12	2015-10-25	13	I10	Essential (primary) hypertension	19	Y	J18.9, J96.21, D65, I50.33, N17.9, E87.2, J38.00, E87.3, R04.2, Z66, Z51.5, J69.0, I27.2, J44.9, I48.91, Z93.1, D53.9, Y95, I10
0214827	259241479	2015-10-12	2015-10-25	13	G47.33	Obstructive sleep apnea (adult) (pediatric)	20	Y	J18.9, J96.21, D65, I50.33, N17.9, E87.2, J38.00, E87.3, R04.2, Z66, Z51.5, J69.0, I27.2, J44.9, I48.91, Z93.1, D53.9, Y95, I10, G47.33
0214827	259241479	2015-10-12	2015-10-25	13	K44.9	Diaphragmatic hernia without obstruction or gangre	21	Y	J18.9, J96.21, D65, I50.33, N17.9, E87.2, J38.00, E87.3, R04.2, Z66, Z51.5, J69.0, I27.2, J44.9, I48.91, Z93.1, D53.9, Y95, I10, G47.33, K44.9
0214827	259241479	2015-10-12	2015-10-25	13	D50.9	Iron deficiency anemia, unspecified	22	Y	J18.9, J96.21, D65, I50.33, N17.9, E87.2, J38.00, E87.3, R04.2, Z66, Z51.5, J69.0, I27.2, J44.9, I48.91, Z93.1, D53.9, Y95, I10, G47.33, K44.9, D50.9
0214827	259241479	2015-10-12	2015-10-25	13	D63.8	Anemia in other chronic diseases classified elsewh	23	Y	J18.9, J96.21, D65, I50.33, N17.9, E87.2, J38.00, E87.3, R04.2, Z66, Z51.5, J69.0, I27.2, J44.9, I48.91, Z93.1, D53.9, Y95, I10, G47.33, K44.9, D50.9, D63.8
0214827	259241479	2015-10-12	2015-10-25	13	R63.4	Abnormal weight loss	24	Y	J18.9, J96.21, D65, I50.33, N17.9, E87.2, J38.00, E87.3, R04.2, Z66, Z51.5, J69.0, I27.2, J44.9, I48.91, Z93.1, D53.9, Y95, I10, G47.33, K44.9, D50.9, D63.8, R63.4
0214827	259241479	2015-10-12	2015-10-25	13	Z79.01	Long term (current) use of anticoagulants	25		J18.9, J96.21, D65, I50.33, N17.9, E87.2, J38.00, E87.3, R04.2, Z66, Z51.5, J69.0, I27.2, J44.9, I48.91, Z93.1, D53.9, Y95, I10, G47.33, K44.9, D50.9, D63.8, R63.4, Z79.01	Last
0221348	259051308	2015-10-05	2015-10-11	6	I50.23	Acute on chronic systolic (congestive) heart failu	1	Y	I50.23
0221348	259051308	2015-10-05	2015-10-11	6	D61.818	Other pancytopenia	2	Y	I50.23, D61.818
0221348	259051308	2015-10-05	2015-10-11	6	N18.6	End stage renal disease	3	Y	I50.23, D61.818, N18.6
0221348	259051308	2015-10-05	2015-10-11	6	D69.6	Thrombocytopenia, unspecified	4	Y	I50.23, D61.818, N18.6, D69.6
0221348	259051308	2015-10-05	2015-10-11	6	I12.0	Hypertensive chronic kidney disease with stage 5 c	5	Y	I50.23, D61.818, N18.6, D69.6, I12.0
0221348	259051308	2015-10-05	2015-10-11	6	D62	Acute posthemorrhagic anemia	6	Y	I50.23, D61.818, N18.6, D69.6, I12.0, D62
0221348	259051308	2015-10-05	2015-10-11	6	I48.91	Unspecified atrial fibrillation	7	Y	I50.23, D61.818, N18.6, D69.6, I12.0, D62, I48.91
0221348	259051308	2015-10-05	2015-10-11	6	I48.92	Unspecified atrial flutter	8	Y	I50.23, D61.818, N18.6, D69.6, I12.0, D62, I48.91, I48.92
0221348	259051308	2015-10-05	2015-10-11	6	B18.2	Chronic viral hepatitis C	9	Y	I50.23, D61.818, N18.6, D69.6, I12.0, D62, I48.91, I48.92, B18.2
0221348	259051308	2015-10-05	2015-10-11	6	I25.10	Atherosclerotic heart disease of native coronary a	10	Y	I50.23, D61.818, N18.6, D69.6, I12.0, D62, I48.91, I48.92, B18.2, I25.10
0221348	259051308	2015-10-05	2015-10-11	6	D53.9	Nutritional anemia, unspecified	11	Y	I50.23, D61.818, N18.6, D69.6, I12.0, D62, I48.91, I48.92, B18.2, I25.10, D53.9
0221348	259051308	2015-10-05	2015-10-11	6	E87.5	Hyperkalemia	12	Y	I50.23, D61.818, N18.6, D69.6, I12.0, D62, I48.91, I48.92, B18.2, I25.10, D53.9, E87.5
0221348	259051308	2015-10-05	2015-10-11	6	E11.9	Type 2 diabetes mellitus without complications	13	Y	I50.23, D61.818, N18.6, D69.6, I12.0, D62, I48.91, I48.92, B18.2, I25.10, D53.9, E87.5, E11.9
0221348	259051308	2015-10-05	2015-10-11	6	I25.2	Old myocardial infarction	14		I50.23, D61.818, N18.6, D69.6, I12.0, D62, I48.91, I48.92, B18.2, I25.10, D53.9, E87.5, E11.9, I25.2
0221348	259051308	2015-10-05	2015-10-11	6	Z99.2	Dependence on renal dialysis	15		I50.23, D61.818, N18.6, D69.6, I12.0, D62, I48.91, I48.92, B18.2, I25.10, D53.9, E87.5, E11.9, I25.2, Z99.2
0221348	259051308	2015-10-05	2015-10-11	6	Z95.5	Presence of coronary angioplasty implant and graft	16		I50.23, D61.818, N18.6, D69.6, I12.0, D62, I48.91, I48.92, B18.2, I25.10, D53.9, E87.5, E11.9, I25.2, Z99.2, Z95.5
0221348	259051308	2015-10-05	2015-10-11	6	Z95.0	Presence of cardiac pacemaker	17		I50.23, D61.818, N18.6, D69.6, I12.0, D62, I48.91, I48.92, B18.2, I25.10, D53.9, E87.5, E11.9, I25.2, Z99.2, Z95.5, Z95.0
0221348	259051308	2015-10-05	2015-10-11	6	Z95.1	Presence of aortocoronary bypass graft	18		I50.23, D61.818, N18.6, D69.6, I12.0, D62, I48.91, I48.92, B18.2, I25.10, D53.9, E87.5, E11.9, I25.2, Z99.2, Z95.5, Z95.0, Z95.1
0221348	259051308	2015-10-05	2015-10-11	6	Z95.2	Presence of prosthetic heart valve	19		I50.23, D61.818, N18.6, D69.6, I12.0, D62, I48.91, I48.92, B18.2, I25.10, D53.9, E87.5, E11.9, I25.2, Z99.2, Z95.5, Z95.0, Z95.1, Z95.2
0221348	259051308	2015-10-05	2015-10-11	6	Z86.73	Personal history of transient ischemic attack (TIA	20		I50.23, D61.818, N18.6, D69.6, I12.0, D62, I48.91, I48.92, B18.2, I25.10, D53.9, E87.5, E11.9, I25.2, Z99.2, Z95.5, Z95.0, Z95.1, Z95.2, Z86.73
0221348	259051308	2015-10-05	2015-10-11	6	Z79.01	Long term (current) use of anticoagulants	21		I50.23, D61.818, N18.6, D69.6, I12.0, D62, I48.91, I48.92, B18.2, I25.10, D53.9, E87.5, E11.9, I25.2, Z99.2, Z95.5, Z95.0, Z95.1, Z95.2, Z86.73, Z79.01	Last
0221964	262940398	2016-02-22	2016-03-04	11	E10.10	Type 1 diabetes mellitus with ketoacidosis without	1	Y	E10.10
0221964	262940398	2016-02-22	2016-03-04	11	I21.4	Non-ST elevation (NSTEMI) myocardial infarction	2	Y	E10.10, I21.4
0221964	262940398	2016-02-22	2016-03-04	11	J18.9	Pneumonia, unspecified organism	3	N	E10.10, I21.4, J18.9
0221964	262940398	2016-02-22	2016-03-04	11	N17.9	Acute kidney failure, unspecified	4	Y	E10.10, I21.4, J18.9, N17.9
0221964	262940398	2016-02-22	2016-03-04	11	E27.1	Primary adrenocortical insufficiency	5	Y	E10.10, I21.4, J18.9, N17.9, E27.1
0221964	262940398	2016-02-22	2016-03-04	11	N18.3	Chronic kidney disease, stage 3 (moderate)	6	Y	E10.10, I21.4, J18.9, N17.9, E27.1, N18.3
0221964	262940398	2016-02-22	2016-03-04	11	I25.82	Chronic total occlusion of coronary artery	7	Y	E10.10, I21.4, J18.9, N17.9, E27.1, N18.3, I25.82
0221964	262940398	2016-02-22	2016-03-04	11	E83.42	Hypomagnesemia	8	N	E10.10, I21.4, J18.9, N17.9, E27.1, N18.3, I25.82, E83.42
0221964	262940398	2016-02-22	2016-03-04	11	E10.21	Type 1 diabetes mellitus with diabetic nephropathy	9	Y	E10.10, I21.4, J18.9, N17.9, E27.1, N18.3, I25.82, E83.42, E10.21
0221964	262940398	2016-02-22	2016-03-04	11	I12.9	Hypertensive chronic kidney disease with stage 1 t	10	Y	E10.10, I21.4, J18.9, N17.9, E27.1, N18.3, I25.82, E83.42, E10.21, I12.9
0221964	262940398	2016-02-22	2016-03-04	11	I25.10	Atherosclerotic heart disease of native coronary a	11	Y	E10.10, I21.4, J18.9, N17.9, E27.1, N18.3, I25.82, E83.42, E10.21, I12.9, I25.10
0221964	262940398	2016-02-22	2016-03-04	11	E10.65	Type 1 diabetes mellitus with hyperglycemia	12	Y	E10.10, I21.4, J18.9, N17.9, E27.1, N18.3, I25.82, E83.42, E10.21, I12.9, I25.10, E10.65
0221964	262940398	2016-02-22	2016-03-04	11	E06.3	Autoimmune thyroiditis	13	Y	E10.10, I21.4, J18.9, N17.9, E27.1, N18.3, I25.82, E83.42, E10.21, I12.9, I25.10, E10.65, E06.3
0221964	262940398	2016-02-22	2016-03-04	11	E03.8	Other specified hypothyroidism	14	Y	E10.10, I21.4, J18.9, N17.9, E27.1, N18.3, I25.82, E83.42, E10.21, I12.9, I25.10, E10.65, E06.3, E03.8
0221964	262940398	2016-02-22	2016-03-04	11	E87.6	Hypokalemia	15	Y	E10.10, I21.4, J18.9, N17.9, E27.1, N18.3, I25.82, E83.42, E10.21, I12.9, I25.10, E10.65, E06.3, E03.8, E87.6
0221964	262940398	2016-02-22	2016-03-04	11	G47.33	Obstructive sleep apnea (adult) (pediatric)	16	Y	E10.10, I21.4, J18.9, N17.9, E27.1, N18.3, I25.82, E83.42, E10.21, I12.9, I25.10, E10.65, E06.3, E03.8, E87.6, G47.33
0221964	262940398	2016-02-22	2016-03-04	11	G47.00	Insomnia, unspecified	17	Y	E10.10, I21.4, J18.9, N17.9, E27.1, N18.3, I25.82, E83.42, E10.21, I12.9, I25.10, E10.65, E06.3, E03.8, E87.6, G47.33, G47.00
0221964	262940398	2016-02-22	2016-03-04	11	E86.0	Dehydration	18	Y	E10.10, I21.4, J18.9, N17.9, E27.1, N18.3, I25.82, E83.42, E10.21, I12.9, I25.10, E10.65, E06.3, E03.8, E87.6, G47.33, G47.00, E86.0
0221964	262940398	2016-02-22	2016-03-04	11	E31.0	Autoimmune polyglandular failure	19	Y	E10.10, I21.4, J18.9, N17.9, E27.1, N18.3, I25.82, E83.42, E10.21, I12.9, I25.10, E10.65, E06.3, E03.8, E87.6, G47.33, G47.00, E86.0, E31.0
0221964	262940398	2016-02-22	2016-03-04	11	Y95	Nosocomial condition	20	N	E10.10, I21.4, J18.9, N17.9, E27.1, N18.3, I25.82, E83.42, E10.21, I12.9, I25.10, E10.65, E06.3, E03.8, E87.6, G47.33, G47.00, E86.0, E31.0, Y95
0221964	262940398	2016-02-22	2016-03-04	11	I25.2	Old myocardial infarction	21		E10.10, I21.4, J18.9, N17.9, E27.1, N18.3, I25.82, E83.42, E10.21, I12.9, I25.10, E10.65, E06.3, E03.8, E87.6, G47.33, G47.00, E86.0, E31.0, Y95, I25.2
0221964	262940398	2016-02-22	2016-03-04	11	Z95.1	Presence of aortocoronary bypass graft	22		E10.10, I21.4, J18.9, N17.9, E27.1, N18.3, I25.82, E83.42, E10.21, I12.9, I25.10, E10.65, E06.3, E03.8, E87.6, G47.33, G47.00, E86.0, E31.0, Y95, I25.2, Z95.1
0221964	262940398	2016-02-22	2016-03-04	11	Z79.4	Long term (current) use of insulin	23		E10.10, I21.4, J18.9, N17.9, E27.1, N18.3, I25.82, E83.42, E10.21, I12.9, I25.10, E10.65, E06.3, E03.8, E87.6, G47.33, G47.00, E86.0, E31.0, Y95, I25.2, Z95.1, Z79.4
0221964	262940398	2016-02-22	2016-03-04	11	Z87.891	Personal history of nicotine dependence	24		E10.10, I21.4, J18.9, N17.9, E27.1, N18.3, I25.82, E83.42, E10.21, I12.9, I25.10, E10.65, E06.3, E03.8, E87.6, G47.33, G47.00, E86.0, E31.0, Y95, I25.2, Z95.1, Z79.4, Z87.891	Last
0221989	259973477	2015-11-05	2015-11-20	15	J69.0	Pneumonitis due to inhalation of food and vomit	1	Y	J69.0
0221989	259973477	2015-11-05	2015-11-20	15	J96.21	Acute and chronic respiratory failure with hypoxia	2	N	J69.0, J96.21
0221989	259973477	2015-11-05	2015-11-20	15	D61.818	Other pancytopenia	3	Y	J69.0, J96.21, D61.818
0221989	259973477	2015-11-05	2015-11-20	15	D68.0	Von Willebrands disease	4	Y	J69.0, J96.21, D61.818, D68.0
0221989	259973477	2015-11-05	2015-11-20	15	J90	Pleural effusion, not elsewhere classified	5	Y	J69.0, J96.21, D61.818, D68.0, J90
0221989	259973477	2015-11-05	2015-11-20	15	R13.10	Dysphagia, unspecified	6	Y	J69.0, J96.21, D61.818, D68.0, J90, R13.10
0221989	259973477	2015-11-05	2015-11-20	15	A41.9	Sepsis, unspecified organism	7	N	J69.0, J96.21, D61.818, D68.0, J90, R13.10, A41.9
0221989	259973477	2015-11-05	2015-11-20	15	E87.2	Acidosis	8	N	J69.0, J96.21, D61.818, D68.0, J90, R13.10, A41.9, E87.2
0221989	259973477	2015-11-05	2015-11-20	15	F72	Severe intellectual disabilities	9	Y	J69.0, J96.21, D61.818, D68.0, J90, R13.10, A41.9, E87.2, F72
0221989	259973477	2015-11-05	2015-11-20	15	Z66	Do not resuscitate	10	N	J69.0, J96.21, D61.818, D68.0, J90, R13.10, A41.9, E87.2, F72, Z66
0221989	259973477	2015-11-05	2015-11-20	15	N39.0	Urinary tract infection, site not specified	11	Y	J69.0, J96.21, D61.818, D68.0, J90, R13.10, A41.9, E87.2, F72, Z66, N39.0
0221989	259973477	2015-11-05	2015-11-20	15	R00.1	Bradycardia, unspecified	12	Y	J69.0, J96.21, D61.818, D68.0, J90, R13.10, A41.9, E87.2, F72, Z66, N39.0, R00.1
0221989	259973477	2015-11-05	2015-11-20	15	R62.7	Adult failure to thrive	13	Y	J69.0, J96.21, D61.818, D68.0, J90, R13.10, A41.9, E87.2, F72, Z66, N39.0, R00.1, R62.7
0221989	259973477	2015-11-05	2015-11-20	15	D63.8	Anemia in other chronic diseases classified elsewh	14	Y	J69.0, J96.21, D61.818, D68.0, J90, R13.10, A41.9, E87.2, F72, Z66, N39.0, R00.1, R62.7, D63.8
0221989	259973477	2015-11-05	2015-11-20	15	G40.909	Epilepsy, unspecified, not intractable, without st	15	Y	J69.0, J96.21, D61.818, D68.0, J90, R13.10, A41.9, E87.2, F72, Z66, N39.0, R00.1, R62.7, D63.8, G40.909
0221989	259973477	2015-11-05	2015-11-20	15	I87.2	Venous insufficiency (chronic) (peripheral)	16	Y	J69.0, J96.21, D61.818, D68.0, J90, R13.10, A41.9, E87.2, F72, Z66, N39.0, R00.1, R62.7, D63.8, G40.909, I87.2
0221989	259973477	2015-11-05	2015-11-20	15	R32	Unspecified urinary incontinence	17	Y	J69.0, J96.21, D61.818, D68.0, J90, R13.10, A41.9, E87.2, F72, Z66, N39.0, R00.1, R62.7, D63.8, G40.909, I87.2, R32
0221989	259973477	2015-11-05	2015-11-20	15	I87.8	Other specified disorders of veins	18	Y	J69.0, J96.21, D61.818, D68.0, J90, R13.10, A41.9, E87.2, F72, Z66, N39.0, R00.1, R62.7, D63.8, G40.909, I87.2, R32, I87.8
0221989	259973477	2015-11-05	2015-11-20	15	E29.1	Testicular hypofunction	19	Y	J69.0, J96.21, D61.818, D68.0, J90, R13.10, A41.9, E87.2, F72, Z66, N39.0, R00.1, R62.7, D63.8, G40.909, I87.2, R32, I87.8, E29.1
0221989	259973477	2015-11-05	2015-11-20	15	E03.9	Hypothyroidism, unspecified	20	Y	J69.0, J96.21, D61.818, D68.0, J90, R13.10, A41.9, E87.2, F72, Z66, N39.0, R00.1, R62.7, D63.8, G40.909, I87.2, R32, I87.8, E29.1, E03.9
0221989	259973477	2015-11-05	2015-11-20	15	L30.9	Dermatitis, unspecified	21	Y	J69.0, J96.21, D61.818, D68.0, J90, R13.10, A41.9, E87.2, F72, Z66, N39.0, R00.1, R62.7, D63.8, G40.909, I87.2, R32, I87.8, E29.1, E03.9, L30.9
0221989	259973477	2015-11-05	2015-11-20	15	Z95.0	Presence of cardiac pacemaker	22		J69.0, J96.21, D61.818, D68.0, J90, R13.10, A41.9, E87.2, F72, Z66, N39.0, R00.1, R62.7, D63.8, G40.909, I87.2, R32, I87.8, E29.1, E03.9, L30.9, Z95.0
0221989	259973477	2015-11-05	2015-11-20	15	S00.03XA	Contusion of scalp, initial encounter	23	Y	J69.0, J96.21, D61.818, D68.0, J90, R13.10, A41.9, E87.2, F72, Z66, N39.0, R00.1, R62.7, D63.8, G40.909, I87.2, R32, I87.8, E29.1, E03.9, L30.9, Z95.0, S00.03XA
0221989	259973477	2015-11-05	2015-11-20	15	W01.0XXA	Fall on same level from slipping, tripping and stu	24	Y	J69.0, J96.21, D61.818, D68.0, J90, R13.10, A41.9, E87.2, F72, Z66, N39.0, R00.1, R62.7, D63.8, G40.909, I87.2, R32, I87.8, E29.1, E03.9, L30.9, Z95.0, S00.03XA, W01.0XXA	Last
0221989	261692479	2016-01-11	2016-01-19	8	A41.9	Sepsis, unspecified organism	1	Y	A41.9
0221989	261692479	2016-01-11	2016-01-19	8	J15.211	Pneumonia due to Methicillin susceptible Staphyloc	2	Y	A41.9, J15.211
0221989	261692479	2016-01-11	2016-01-19	8	R65.21	Severe sepsis with septic shock	3	Y	A41.9, J15.211, R65.21
0221989	261692479	2016-01-11	2016-01-19	8	R00.1	Bradycardia, unspecified	4	Y	A41.9, J15.211, R65.21, R00.1
0221989	261692479	2016-01-11	2016-01-19	8	E86.0	Dehydration	5	Y	A41.9, J15.211, R65.21, R00.1, E86.0
0221989	261692479	2016-01-11	2016-01-19	8	I34.0	Nonrheumatic mitral (valve) insufficiency	6	Y	A41.9, J15.211, R65.21, R00.1, E86.0, I34.0
0221989	261692479	2016-01-11	2016-01-19	8	F79	Unspecified intellectual disabilities	7	Y	A41.9, J15.211, R65.21, R00.1, E86.0, I34.0, F79
0221989	261692479	2016-01-11	2016-01-19	8	I87.2	Venous insufficiency (chronic) (peripheral)	8	Y	A41.9, J15.211, R65.21, R00.1, E86.0, I34.0, F79, I87.2
0221989	261692479	2016-01-11	2016-01-19	8	E03.8	Other specified hypothyroidism	9	Y	A41.9, J15.211, R65.21, R00.1, E86.0, I34.0, F79, I87.2, E03.8
0221989	261692479	2016-01-11	2016-01-19	8	D89.2	Hypergammaglobulinemia, unspecified	10	Y	A41.9, J15.211, R65.21, R00.1, E86.0, I34.0, F79, I87.2, E03.8, D89.2
0221989	261692479	2016-01-11	2016-01-19	8	G40.909	Epilepsy, unspecified, not intractable, without st	11	Y	A41.9, J15.211, R65.21, R00.1, E86.0, I34.0, F79, I87.2, E03.8, D89.2, G40.909
0221989	261692479	2016-01-11	2016-01-19	8	Z88.0	Allergy status to penicillin	12		A41.9, J15.211, R65.21, R00.1, E86.0, I34.0, F79, I87.2, E03.8, D89.2, G40.909, Z88.0
0221989	261692479	2016-01-11	2016-01-19	8	Z88.1	Allergy status to other antibiotic agents status	13		A41.9, J15.211, R65.21, R00.1, E86.0, I34.0, F79, I87.2, E03.8, D89.2, G40.909, Z88.0, Z88.1
0221989	261692479	2016-01-11	2016-01-19	8	Z95.0	Presence of cardiac pacemaker	14		A41.9, J15.211, R65.21, R00.1, E86.0, I34.0, F79, I87.2, E03.8, D89.2, G40.909, Z88.0, Z88.1, Z95.0
0221989	261692479	2016-01-11	2016-01-19	8	Z88.8	Allergy status to other drugs, medicaments and bio	15		A41.9, J15.211, R65.21, R00.1, E86.0, I34.0, F79, I87.2, E03.8, D89.2, G40.909, Z88.0, Z88.1, Z95.0, Z88.8	Last
0221989	262453178	2016-02-04	2016-02-17	13	R68.0	Hypothermia, not associated with low environmental	1	Y	R68.0
0221989	262453178	2016-02-04	2016-02-17	13	J96.01	Acute respiratory failure with hypoxia	2	N	R68.0, J96.01
0221989	262453178	2016-02-04	2016-02-17	13	J69.0	Pneumonitis due to inhalation of food and vomit	3	N	R68.0, J96.01, J69.0
0221989	262453178	2016-02-04	2016-02-17	13	J90	Pleural effusion, not elsewhere classified	4	N	R68.0, J96.01, J69.0, J90
[truncated: 6,503 more rows]

## Sheet: Sheet2
MRN	FIN	Admit Dt	Disch Dt	LOS	Dx Code	Dx Desc	Dx Seq	POA	CodeList
0014578	260024823	2015-11-10	2015-11-13	3	H91.93	Unspecified hearing loss, bilateral	20	Y	K22.2, N39.0, R13.10, J45.901, K20.9, K30, I10, R11.2, E03.9, J45.909, Z66, E78.5, K44.9, Z87.440, M19.90, R32, Z87.891, R63.4, K57.90, H91.93
0017833	259706133	2015-10-28	2015-11-04	7	Z79.82	Long term (current) use of aspirin	15		A41.02, G93.41, I69.354, N39.0, I08.1, I48.91, R65.20, Z66, E11.9, I10, Z87.891, Z89.512, I69.31, Z79.02, Z79.82
0027160	261315212	2015-12-25	2015-12-27	2	I25.2	Old myocardial infarction	13		I50.43, N17.9, J90, J81.1, I25.82, I25.10, Z95.1, I48.0, E11.9, I10, E78.5, I34.0, I25.2
0027221	258835131	2015-09-28	2015-10-07	9	Z85.43	Personal history of malignant neoplasm of ovary	11		I82.412, I82.422, G35, D50.9, I10, E11.9, I82.432, R19.09, J44.9, J45.909, Z85.43
0028119	263763989	2016-03-18	2016-03-22	4	Z91.81	History of falling	13		I48.0, N39.0, E87.1, I34.0, I10, D72.829, S61.412A, E78.5, I25.10, W18.30XA, Z85.43, Z92.21, Z91.81
0032550	258973817	2015-10-02	2015-10-09	7	Z79.02	Long term (current) use of antithrombotics/antipla	21		S82.842A, I50.32, R65.10, Z68.41, E55.9, E83.52, I50.9, R00.0, E78.5, I10, I25.10, Z95.5, R53.1, E21.0, K59.00, E66.01, R33.9, N40.0, G47.33, W18.30XA, Z79.02
0037834	263006587	2016-02-23	2016-02-28	5	Z79.4	Long term (current) use of insulin	20		A41.9, J96.01, I50.23, J96.02, J18.9, N17.9, Z94.0, I25.10, I12.9, N18.9, E78.5, B96.89, E11.9, G47.33, N31.9, I25.2, Z88.1, Z95.5, Z88.8, Z79.4
0041688	261467278	2016-01-02	2016-01-09	7	Z87.891	Personal history of nicotine dependence	23		A41.9, J96.21, R65.20, J18.9, N17.9, E87.2, I50.32, E11.40, J96.22, J44.1, J44.0, N39.0, Z99.81, Y95, I34.0, E87.6, G47.33, I10, I25.10, Z95.1, Z95.5, Z87.01, Z87.891
0042047	259928604	2015-11-04	2015-11-18	14	E87.6	Hypokalemia	30	Y	A41.01, G93.41, N17.9, E87.0, E87.4, J96.11, D68.9, J18.9, I85.00, E87.1, N39.0, K76.6, R65.20, D69.6, E11.65, K74.69, J44.9, E83.42, E87.70, E88.81, I07.1, I25.10, I70.0, Z66, I25.2, D73.1, M06.9, B35.6, I10, E87.6
0043220	262508971	2016-02-07	2016-02-09	2	Z95.1	Presence of aortocoronary bypass graft	16		A41.9, J96.01, R65.20, J18.9, I50.32, E11.9, I35.0, J44.1, F41.9, I25.10, Z93.0, I25.2, Z88.1, Z91.041, Z79.899, Z95.1
0043220	263973893	2016-03-26	2016-03-28	2	F41.9	Anxiety disorder, unspecified	14	Y	J44.1, J96.21, N18.4, E87.2, R65.10, I50.42, Z99.81, E87.5, E11.9, I35.0, I25.10, Z95.1, I25.2, F41.9
0045705	263436214	2016-03-10	2016-03-16	6	Z96.649	Presence of unspecified artificial hip joint	17	Y	G93.40, A41.9, I50.33, Z94.4, N17.9, R18.8, E87.1, Z94.0, M85.80, F17.210, I35.0, D64.9, E78.5, H91.90, E11.9, I10, Z96.649
0048298	260514005	2015-11-24	2015-12-04	10	M43.16	Spondylolisthesis, lumbar region	28	Y	K26.9, J96.10, E11.649, E22.2, Z99.81, F11.20, E87.1, E83.42, K22.6, J44.9, I10, K43.5, I25.10, Z95.5, I73.9, E87.6, G89.29, E78.5, M79.7, F41.9, K44.9, Z79.891, Z93.2, Z86.73, Z85.038, M54.5, F40.240, M43.16
0048298	263562563	2016-03-13	2016-03-18	5	Z79.891	Long term (current) use of opiate analgesic	30		K92.2, E46, E87.1, K31.84, N32.81, K25.9, I10, J44.9, E11.9, D50.9, K64.8, E78.5, K29.80, M79.7, I25.10, M85.80, K29.70, K21.9, G47.33, R63.1, M62.81, W19.XXXA, Z85.038, Z85.118, Z93.2, Z90.49, Z87.891, Z85.048, Z87.11, Z79.891
0049994	259012540	2015-10-05	2015-10-13	8	Z88.2	Allergy status to sulfonamides status	28		A41.9, J96.22, N17.0, I50.31, J18.9, L89.321, L89.151, R65.20, E87.2, N39.0, Z68.43, J44.1, I25.10, E66.01, B96.4, E87.6, K59.00, B96.20, I12.9, N18.9, Z79.899, Z79.82, Z95.5, Z99.81, Z87.891, Z88.0, Z88.1, Z88.2
0049994	262754013	2016-02-16	2016-02-26	10	Z91.19	Patients noncompliance with other medical treatmen	22	N	J96.21, J18.9, N17.9, I50.33, L03.116, N18.3, E87.3, J44.1, Z68.42, E87.5, Z66, D63.1, I12.9, I25.10, R23.0, G47.33, H57.02, K59.00, E66.9, Y95, Z87.891, Z91.19
0050375	259005676	2015-10-03	2015-10-08	5	Z66	Do not resuscitate	16	Y	N17.9, E87.0, E87.2, N13.8, I12.0, N39.0, N13.30, N18.6, E87.6, D63.1, I73.9, B95.2, Z85.51, F17.210, E87.5, Z66
0053160	263539686	2016-03-11	2016-03-15	4	J45.909	Unspecified asthma, uncomplicated	6	Y	K92.1, D62, K22.70, K44.9, K20.9, J45.909
0057002	261132492	2015-12-17	2015-12-19	2	Z85.3	Personal history of malignant neoplasm of breast	16		N13.1, N17.9, E87.2, Q60.0, I12.0, N18.6, E87.5, D53.9, E78.5, J44.9, Z90.5, I34.0, Z99.2, Z88.5, Z87.891, Z85.3
0060484	261954010	2016-01-19	2016-01-21	2	Z86.73	Personal history of transient ischemic attack (TIA	8		I50.33, J96.01, I48.2, Z66, I10, E78.5, Z91.81, Z86.73
0064430	260815014	2015-12-07	2015-12-10	3	R06.00	Dyspnea, unspecified	26	Y	I50.33, E87.2, E11.649, N17.9, Z68.41, N18.3, I24.8, I07.1, E87.1, I25.10, E87.5, Z85.038, Z90.49, Z87.891, K21.9, J44.9, I25.2, G47.33, F32.9, E78.5, I12.9, D50.9, R33.9, E66.01, Z95.5, R06.00
0064430	261540876	2016-01-05	2016-01-10	5	Z79.4	Long term (current) use of insulin	29		J44.1, J96.22, I50.43, N17.9, N18.3, E11.22, E11.40, N39.0, B96.20, C44.509, Z68.42, E87.1, Z99.81, E11.65, I25.10, Z95.5, I48.91, E11.319, E66.01, D63.8, I12.9, Z72.0, G47.33, E78.5, I25.2, Z93.3, Z85.038, Z90.49, Z79.4
0064430	262084007	2016-01-24	2016-02-17	24	Z85.038	Personal history of other malignant neoplasm of la	25		J96.21, R65.20, J15.212, I50.33, A41.9, N17.9, E87.0, N18.4, I08.3, I24.8, I42.9, J44.1, Z68.41, J96.22, Z99.81, E11.40, I25.82, E11.65, I12.9, E11.649, D63.8, E66.01, I25.10, Z79.02, Z85.038
0064430	263115065	2016-02-27	2016-03-04	6	Z93.3	Colostomy status	30		I21.4, J96.21, I50.43, N17.9, N18.3, J44.0, D50.9, F17.200, I12.9, J96.22, N39.0, E66.2, E11.21, E11.65, Z99.81, I25.10, K21.9, E78.5, E11.319, B96.20, E11.649, G89.29, I08.0, F32.9, D63.8, I25.5, I48.91, Z88.6, Z85.038, Z93.3
0068040	261389183	2015-12-29	2016-01-09	11	Z96.642	Presence of left artificial hip joint	23	Y	I50.33, J96.21, J18.9, N17.9, I27.2, Z86.74, I48.91, Z99.81, J44.1, D63.8, R31.0, I10, I25.119, G47.00, Y95, M54.9, G89.29, G43.909, Z79.01, Z87.01, Z91.19, Z95.810, Z96.642
0070133	261893283	2016-01-17	2016-01-22	5	Z68.42	Body mass index (BMI) 45.0-49.9, adult	25		I50.33, J96.21, J18.9, G92, N17.9, E87.3, N18.3, F03.90, N39.0, E11.22, R13.10, I12.9, J44.9, F32.9, E78.5, E66.01, G47.33, I25.10, D64.9, R41.82, E87.6, Z88.8, Z87.440, Z79.4, Z68.42
0070133	262909047	2016-02-20	2016-02-29	9	Z99.2	Dependence on renal dialysis	28		N17.9, J96.01, I50.33, E87.4, I95.9, F03.90, E87.5, Z68.42, I12.0, G62.9, E66.2, J44.9, E11.9, G47.33, E66.01, F32.9, I25.10, Z53.09, D64.9, K21.9, M10.9, N18.6, Z91.19, Z88.8, Z88.6, Z79.4, Z87.891, Z99.2
0073046	262087679	2016-01-25	2016-01-29	4	Z86.718	Personal history of other venous thrombosis and em	29		A41.9, I26.99, I21.4, G92, E22.2, N39.0, I51.81, I50.30, R65.20, I10, I73.9, Z89.512, I25.10, F17.210, E87.6, B96.20, E83.39, Z91.19, Z89.611, F17.200, G62.9, F10.20, F12.90, F32.9, F41.9, G40.909, G89.29, I25.84, Z86.718
0077152	262683485	2016-02-12	2016-02-16	4	B95.62	Methicillin resistant Staphylococcus aureus infect	16	Y	A41.9, N18.6, I12.0, T82.868A, L03.317, L02.31, K61.1, I25.10, Z87.891, Z99.2, F41.8, B19.20, M10.9, Y95, Y83.2, B95.62
0090967	259214187	2015-10-11	2015-10-16	5	Z91.041	Radiographic dye allergy status	19		A41.9, J96.20, G82.50, Z99.11, J95.851, L89.159, R65.20, K94.23, Y83.3, E03.9, I10, K31.84, D64.9, B96.89, F43.9, Y92.9, Z86.14, Z88.1, Z91.041
0096885	262303845	2016-02-01	2016-02-09	8	Z88.1	Allergy status to other antibiotic agents status	20		I31.2, J96.01, I50.31, J90, I48.2, E11.9, D64.9, E78.0, I48.1, I10, Z79.4, I73.9, I87.2, E78.5, Z89.512, M19.90, I25.10, K59.00, Z86.73, Z88.1
0096885	263032310	2016-02-24	2016-02-28	4	Z88.1	Allergy status to other antibiotic agents status	19		I50.33, J96.21, I31.2, N17.9, J91.8, I48.2, S80.829A, E78.5, I10, E11.9, I73.9, I25.10, I87.2, K21.9, Z79.4, Z79.01, Z89.512, Z79.82, Z88.1
0097535	260298906	2015-11-17	2015-11-21	4	E78.5	Hyperlipidemia, unspecified	30	Y	I21.4, N17.9, J96.11, D89.9, Z68.41, E66.2, N39.0, Z99.81, R41.82, J44.9, L40.9, F17.210, G47.33, D63.8, R60.1, Z82.49, I45.10, I24.8, I51.7, I25.10, D47.2, R41.0, B96.1, M54.2, G89.29, M54.5, R63.0, Z79.82, J98.4, E78.5
0101211	261895312	2016-01-18	2016-02-15	28	Z87.891	Personal history of nicotine dependence	25		A41.9, D65, J96.01, N17.0, R65.21, K65.1, K81.0, N18.3, D69.6, I48.92, K57.20, N39.0, I24.8, I50.20, Z66, Z51.5, I48.91, J44.9, J45.909, I27.2, L97.519, E11.9, D63.8, I12.9, Z87.891
0106859	261249932	2015-12-22	2015-12-26	4	I25.2	Old myocardial infarction	18		K31.811, E87.2, I50.32, E87.5, D62, I48.0, J44.9, I49.1, I10, J45.909, K44.9, E03.9, E78.5, H54.41, F03.90, M19.90, Z79.01, I25.2
0116606	262961758	2016-02-22	2016-02-27	5	Z86.73	Personal history of transient ischemic attack (TIA	25		A41.9, R65.21, I50.33, N17.9, J18.9, E87.2, J91.8, N39.0, E11.9, D64.9, I51.81, Z66, Z51.5, E87.5, I48.0, N18.3, I12.9, G47.33, R41.0, E78.5, M10.9, Z93.3, Y95, Z79.01, Z86.73
0117456	261316541	2015-12-25	2015-12-29	4	S82.92XA	Unspecified fracture of left lower leg, initial en	30	Y	B37.81, E87.2, N39.0, R71.0, E53.8, N18.3, R13.10, R07.89, I25.10, I12.9, Z95.5, D50.9, K64.9, R23.3, F32.9, F41.9, Z87.891, Z90.49, K20.8, K29.80, K29.60, K44.9, B95.1, E03.9, E78.5, Z86.14, I34.0, Z79.82, R19.7, S82.92XA
0117456	261459952	2016-01-01	2016-01-05	4	Z87.440	Personal history of urinary (tract) infections	19		A41.9, E87.2, N17.9, A04.7, K22.70, D51.9, E83.51, N18.3, N39.0, I25.10, Z95.5, I12.9, D50.9, E78.5, E03.9, E86.0, Z93.3, Z79.82, Z87.440
0119422	261604219	2016-01-06	2016-01-12	6	Z88.8	Allergy status to other drugs, medicaments and bio	13		K50.90, K56.69, N17.9, A04.7, E87.2, N18.3, E87.6, F17.210, I12.9, K21.9, Z88.0, Z88.2, Z88.8
0119639	259084093	2015-10-06	2015-10-16	10	Z79.4	Long term (current) use of insulin	30		I63.9, J96.01, R40.20, N17.9, I47.2, E87.0, E11.65, I48.92, I69.354, I48.1, I50.9, Z99.81, J44.9, E66.01, I51.3, I25.10, E78.5, G47.33, I45.10, Z91.19, Z66, R47.02, I65.23, I12.9, N18.9, Z68.37, J45.909, Z95.1, I25.2, Z79.4
0121241	262763097	2016-02-16	2016-03-09	22	K75.81	Nonalcoholic steatohepatitis (NASH)	28	Y	I50.33, J96.21, J18.9, B37.0, E11.65, E88.81, J96.22, E66.2, F11.20, J44.1, Z68.45, L97.229, I27.2, Z99.81, E03.9, I89.0, I10, Y95, Z79.4, Z87.891, K59.00, I87.2, Z88.0, G89.29, Z91.19, F32.9, R21, K75.81
0125315	261999775	2016-01-20	2016-02-19	30	I10	Essential (primary) hypertension	22	Y	J96.21, R65.20, J85.2, I50.33, J18.9, A41.9, I27.2, I08.1, A04.7, J44.1, J95.811, N17.9, J90, Z66, Z51.5, J98.8, I46.9, J96.22, Y84.4, R73.09, F17.210, I10
0127473	262301682	2016-01-31	2016-02-08	8	Z68.29	Body mass index (BMI) 29.0-29.9, adult	25		A41.50, N17.9, E46, L89.43, N39.0, E11.9, B96.20, L89.314, J98.11, R65.20, Z93.3, E78.5, L89.322, G80.8, G47.33, N28.9, M62.469, Z89.421, E83.42, Z79.4, B96.5, Z22.321, D50.9, S80.211A, Z68.29
0128681	261523872	2016-01-04	2016-01-11	7	Z99.81	Dependence on supplemental oxygen	20		I50.43, J96.02, K25.4, K26.4, J96.01, Z68.42, G47.33, E78.5, E66.9, E03.9, F17.210, I48.0, E11.9, I25.10, K20.9, J44.9, I25.5, T45.515A, I10, Z99.81
0130093	260131081	2015-11-11	2015-11-13	2	R63.5	Abnormal weight gain	19	Y	J96.00, I50.23, I48.91, R63.0, E83.42, E11.9, D64.9, I10, I25.10, Z95.1, Z96.651, Z96.649, Z87.891, Z79.899, I35.0, R39.11, T50.1X5A, E87.6, R63.5
0134547	262856818	2016-02-18	2016-02-23	5	Z86.718	Personal history of other venous thrombosis and em	18		G56.12, I69.354, M79.81, E78.5, I10, Z96.612, E88.89, K21.9, D50.9, K57.90, M89.9, E87.6, Z88.2, Z88.8, Z91.041, Z79.01, Z86.711, Z86.718
0137165	259399061	2015-10-16	2015-10-21	5	Y92.9	Unspecified place or not applicable	26		T85.79XA, R65.20, N17.9, C25.9, A41.9, K83.1, K83.0, I42.9, B96.20, E11.40, Z51.5, Z90.5, E78.5, K21.9, G47.30, I12.9, N18.9, Y83.8, Z85.51, Z85.528, Z88.8, Z79.82, Z87.891, Z95.810, Z79.4, Y92.9
0138083	160161048	2015-12-24	2015-12-25	1	Z86.73	Personal history of transient ischemic attack (TIA	17		R55, N18.3, I48.2, S01.81XA, D53.9, F10.20, Y90.0, I44.7, W19.XXXA, I12.9, I25.10, I51.7, E78.5, E03.9, Z79.01, Z95.5, Z86.73
0139143	260140033	2015-11-11	2015-11-24	13	Z65.9	Problem related to unspecified psychosocial circum	25		K83.8, J98.11, I50.30, E88.81, Z68.43, K82.8, Z76.5, E66.01, E11.9, J45.909, I10, R31.9, F43.10, G43.909, F32.9, F41.0, F60.9, Z90.49, Z86.718, Z86.711, Z79.01, Z88.2, Z88.8, Z82.49, Z65.9
0144302	259273076	2015-10-13	2015-10-26	13	Z87.891	Personal history of nicotine dependence	20		J44.1, N17.9, I47.2, K43.3, Z99.81, K22.70, E53.8, J43.9, K21.9, K44.9, D63.8, I10, F41.9, I25.10, Z93.3, K57.30, D72.828, E78.5, Z86.718, Z87.891
0145285	259256733	2015-10-13	2015-10-13	1	Z79.4	Long term (current) use of insulin	17		C22.8, I85.11, I95.9, N17.9, K76.6, K70.31, B19.10, J44.9, E11.9, F10.10, R00.0, R06.00, B19.20, Z88.8, Z72.0, Z51.5, Z79.4
0148041	261468979	2016-01-02	2016-01-06	4	K64.5	Perianal venous thrombosis	13	Y	K72.90, K76.6, I85.00, R18.8, D69.59, I48.91, K74.60, I10, I25.10, K52.9, F32.9, K75.81, K64.5
0148041	263345001	2016-03-06	2016-03-18	12	Z88.2	Allergy status to sulfonamides status	30		A41.9, K76.7, R65.21, N17.9, K65.2, I85.10, R18.8, D69.6, Z68.42, N39.0, K76.6, I48.91, K74.60, E78.5, I25.10, F32.9, E66.01, K75.81, N18.9, I12.9, Z95.5, E16.2, B96.1, F41.9, K72.90, F17.200, G89.29, I73.9, Z79.01, Z88.2
0149312	262459126	2016-02-04	2016-02-18	14	Z72.0	Tobacco use	25		A41.9, J96.21, R57.8, N17.0, R65.20, J18.9, D62, I50.32, I25.110, D69.6, K26.4, Z68.41, J44.1, J44.0, K22.10, I82.619, G47.33, I20.9, E87.5, Z91.19, Z99.81, E66.01, I48.91, I71.4, Z72.0
0151354	262908189	2016-02-20	2016-02-25	5	E78.5	Hyperlipidemia, unspecified	18	Y	C17.0, K83.0, C78.7, K83.1, R64, C78.89, I48.91, E11.9, Z68.1, R59.0, I10, E87.6, K21.0, R45.1, K59.00, Z86.73, F10.21, E78.5
0155975	259256634	2015-10-13	2015-10-17	4	I69.398	Other sequelae of cerebral infarction	12		I21.4, I60.8, R47.01, G81.94, Q21.1, R56.9, Z87.891, E11.9, E78.5, Z95.2, Z79.82, I69.398
0156601	260491758	2015-11-24	2015-12-02	8	Y92.009	Unspecified place in unspecified non-institutional	29		I63.9, J96.00, J69.0, N17.9, I67.4, E11.9, B95.1, F33.1, J98.11, E78.5, I10, I25.10, K21.9, I34.0, I70.0, D35.00, E55.9, F43.29, F41.9, G25.81, I51.7, I25.2, Z88.0, W18.30XA, Z91.040, Z95.1, Z86.73, Z95.5, Y92.009
0157174	259011732	2015-10-04	2015-10-10	6	K44.9	Diaphragmatic hernia without obstruction or gangre	23	Y	C25.3, K85.9, E87.2, K83.1, K22.10, J44.9, K22.70, K26.9, K81.9, K21.9, Z79.4, E03.9, I10, E78.5, F31.9, E11.9, G47.33, Z86.73, F17.210, E87.6, F41.9, K29.90, K44.9
0157332	261186647	2015-12-20	2015-12-31	11	Z91.19	Patients noncompliance with other medical treatmen	29	Y	F10.231, E87.2, K76.6, I85.00, K80.00, I95.9, D69.6, K92.2, K50.90, K70.40, K70.31, D50.0, K31.89, I10, B19.20, K29.70, F22, E87.6, E83.42, R16.1, R06.00, N39.490, G40.909, G62.9, F31.9, F41.8, R29.6, Z93.2, Z91.19
0159730	262111602	2016-01-25	2016-01-30	5	Y92.009	Unspecified place in unspecified non-institutional	28		S42.201A, E22.2, S72.051A, D69.6, D62, N39.0, J43.9, D50.9, E11.9, B19.20, D53.9, F10.10, F25.0, F41.9, I10, W00.0XXA, F32.9, M54.9, G89.29, I25.10, K80.20, K57.30, D63.8, I73.9, K59.00, S30.0XXA, Z72.0, Y92.009
0159984	260289319	2015-11-17	2015-11-25	8	Z86.14	Personal history of Methicillin resistant Staphylo	22		J96.01, I50.23, J44.1, E11.40, E11.621, L03.116, Z68.42, Z99.81, I25.5, B95.1, E66.9, G47.33, I25.10, I25.2, I10, Z95.5, Z79.4, L97.529, L89.899, F17.210, Z79.02, Z86.14
0160572	261570634	2016-01-06	2016-01-12	6	Z79.4	Long term (current) use of insulin	27		G92, N17.9, E87.2, I50.22, E11.621, M86.672, M86.8X7, R13.19, F41.9, J45.909, E78.5, F32.9, K21.9, E86.0, E11.65, L97.529, J33.0, D64.9, N18.3, E34.9, E66.9, I12.9, I25.5, I73.9, Z87.891, Z88.0, Z79.4
0163083	262683204	2016-02-12	2016-02-18	6	Z95.5	Presence of coronary angioplasty implant and graft	16		A41.9, R65.20, I12.0, N18.6, I48.91, L02.416, L03.116, E87.1, G47.33, K59.00, E87.5, E11.9, I25.10, Z99.2, Z79.4, Z95.5
0163285	262130404	2016-01-25	2016-01-27	2	Z82.49	Family history of ischemic heart disease and other	7		I25.110, E78.5, Z21, I10, F17.210, Z96.652, Z82.49
0167844	262783467	2016-02-16	2016-02-24	8	Z86.73	Personal history of transient ischemic attack (TIA	20		J44.1, I50.9, F03.90, E11.9, D72.829, I47.1, I48.91, G62.9, E78.5, I48.92, I51.7, J40, R59.0, I10, T38.0X5A, Y92.239, F32.9, F43.10, F17.210, Z86.73
0168104	259990364	2015-11-06	2015-11-11	5	Z79.82	Long term (current) use of aspirin	16		T82.7XXA, A41.9, N18.6, R65.21, J96.01, E10.40, I12.0, E10.319, I25.10, E78.5, R19.7, Z79.4, Z86.718, Z87.891, Z88.6, Z79.82
0172650	261685630	2016-01-09	2016-01-20	11	Z66	Do not resuscitate	19	Y	J69.0, J96.21, N17.9, E87.0, R64, I69.354, R13.10, J90, I50.32, J95.812, E46, Z68.1, J44.9, J45.909, I12.9, I69.391, I69.398, N18.3, Z66
0174709	261735112	2016-01-11	2016-01-14	3	Z88.6	Allergy status to analgesic agent status	15		J44.1, Q31.3, I10, E78.5, G89.29, M54.9, K21.9, F32.9, H40.9, K14.9, F17.200, J38.3, Z88.0, Z88.1, Z88.6
0174951	259056992	2015-10-06	2015-10-09	3	Z99.2	Dependence on renal dialysis	15		I95.3, R65.20, N18.6, K76.6, A41.9, I12.0, E83.51, J44.9, F10.21, D50.9, I95.9, D63.1, B18.2, K21.9, Z99.2
0175829	260426937	2015-11-22	2015-11-25	3	F17.210	Nicotine dependence, cigarettes, uncomplicated	4	Y	L02.414, L03.114, B95.62, F17.210
0181465	259524932	2015-10-21	2015-10-26	5	Z79.01	Long term (current) use of anticoagulants	23		I50.33, J96.00, N17.9, J90, D69.6, L97.909, N39.0, E87.5, I48.0, R09.89, L03.90, K21.9, I10, M19.90, I87.8, B96.1, I87.2, I51.7, Z88.6, Z88.8, Z79.899, Z79.82, Z79.01
0185586	262710775	2016-02-15	2016-03-06	20	F17.210	Nicotine dependence, cigarettes, uncomplicated	17	Y	A41.9, J96.01, E87.2, J18.9, J80, J38.4, Z99.81, F13.239, R65.20, E83.42, E87.70, J44.9, E87.6, G47.33, N18.2, I12.9, F17.210
0187652	263239139	2016-03-02	2016-03-09	7	F17.210	Nicotine dependence, cigarettes, uncomplicated	18	Y	A41.9, J96.01, R65.21, N17.9, J18.9, E87.2, D69.6, N39.0, Z99.81, J44.9, E87.6, E78.5, Y95, E03.9, I10, I73.9, Z66, F17.210
0190013	261182026	2015-12-20	2015-12-24	4	B96.20	Unspecified Escherichia coli E. coli as the cause	21	N	I97.618, T81.32XA, I42.9, I50.42, N39.0, I48.2, G62.9, D62, R55, I10, Z95.810, I77.819, I95.1, N40.0, Z87.891, I71.4, W18.39XA, Y92.018, R53.1, R42, B96.20
0192070	259368264	2015-10-15	2015-10-22	7	K31.9	Disease of stomach and duodenum, unspecified	28	Y	Q27.33, E87.2, I42.9, I50.32, D62, K62.6, K92.1, E83.42, F03.90, I48.2, I48.91, Z66, I10, E78.5, I25.10, Z95.5, D50.0, Z86.718, N18.3, I12.9, K57.30, Z74.01, Z85.3, Z79.01, E87.6, R42, K56.41, K31.9
0193414	260678966	2015-12-02	2015-12-05	3	Z87.891	Personal history of nicotine dependence	13		I49.5, I50.30, E11.42, Q21.1, G47.33, I10, I35.0, E78.0, N40.0, K21.9, M10.9, G43.909, Z87.891
0195985	259288900	2015-10-13	2015-10-20	7	K29.60	Other gastritis without bleeding	14	Y	M79.3, I50.32, B37.81, E11.649, D69.6, L89.892, Z79.4, K44.9, R21, F17.210, I10, J44.9, D64.9, K29.60
0195985	259865863	2015-11-02	2015-11-13	11	L98.499	Non-pressure chronic ulcer of skin of other sites	30	Y	N17.9, I50.32, D72.1, K76.0, E11.65, N12, B96.89, R63.0, R13.10, D64.89, K21.9, M19.90, M79.7, Z79.4, M79.3, L29.9, K58.9, R21, Z91.81, K29.60, L30.4, R16.1, Z68.39, H91.91, D50.9, B95.2, B95.7, R63.3, K44.9, L98.499
0197165	258848662	2015-10-05	2015-10-14	9	Z82.49	Family history of ischemic heart disease and other	25		T78.3XXA, J96.01, E87.2, I74.2, N18.6, I12.0, R00.1, T82.868A, T88.6XXA, T81.30XA, I50.32, D63.1, G47.33, E78.5, Z99.2, T50.8X5A, Y83.8, Y92.234, I25.10, E11.21, Z79.4, Z88.0, Z86.19, Z88.2, Z82.49
0197165	261386460	2015-12-29	2015-12-31	2	Z99.2	Dependence on renal dialysis	20		A41.9, N18.6, R65.20, I12.0, I50.30, T82.898A, E78.5, E11.9, I50.9, J44.9, E11.21, E87.6, I25.10, G47.33, Z79.4, Z88.0, Z88.6, Z88.2, Z87.891, Z99.2
0197165	262254188	2016-01-28	2016-02-01	4	Z87.892	Personal history of anaphylaxis	22		I63.432, I50.30, N18.6, T82.868A, I12.0, E11.9, D64.9, I25.10, Y83.2, R47.01, Z79.4, Z99.2, Z88.6, G47.33, E78.5, Z87.891, Z88.0, Z88.2, Z88.8, Z91.041, L50.9, Z87.892
0200221	261891287	2016-01-17	2016-01-22	5	Y90.8	Blood alcohol level of 240 mg/100 ml or more	14	Y	E22.2, J96.01, J44.1, F10.239, I10, E78.5, E53.8, F17.200, K76.0, E83.51, E87.6, D53.9, R33.9, Y90.8
0200430	259943066	2015-11-04	2015-11-06	2	R74.8	Abnormal levels of other serum enzymes	14	Y	C22.0, I81, D69.6, K74.60, E88.09, F17.210, F10.21, R59.0, B19.20, F10.20, R63.4, R59.9, R19.7, R74.8
0203271	259617355	2015-10-24	2015-10-28	4	Z85.118	Personal history of other malignant neoplasm of br	20		A41.51, G93.41, N17.9, I48.0, I50.9, E86.0, E87.1, E83.41, N10, J44.9, I12.9, N18.9, E78.5, R65.20, N40.1, R33.8, Z79.2, Z88.0, Z88.8, Z85.118
0203486	261265888	2015-12-22	2015-12-24	2	M54.5	Low back pain	11	Y	C22.1, I48.91, E78.5, I10, G89.29, N40.0, Z86.010, Z86.73, M17.0, Z79.01, M54.5
0205935	261589782	2016-01-06	2016-01-13	7	Z85.828	Personal history of other malignant neoplasm of sk	24		I63.522, E87.2, M31.31, B37.81, D47.9, E87.1, G81.94, Q04.8, Z94.0, R47.01, E11.65, M35.00, D63.8, R73.9, E83.42, E83.39, E78.1, I25.10, R47.1, E87.5, I12.9, N18.2, Z95.1, Z85.828
0206954	262912645	2016-02-21	2016-03-11	19	Y95	Nosocomial condition	18	N	A41.9, N17.0, J96.01, E87.0, E87.4, J81.1, J18.9, M62.82, T68.XXXA, E83.51, R65.20, F25.9, Z91.19, K21.9, E86.0, E83.39, I10, Y95
0209492	263552929	2016-03-12	2016-03-24	12	Z79.01	Long term (current) use of anticoagulants	14		N10, N17.9, N13.2, D86.9, D62, N30.91, R31.0, N13.6, Z95.2, D64.9, K21.9, G47.33, I10, Z79.01
0210068	263057135	2016-02-25	2016-03-04	8	Z51.5	Encounter for palliative care	20		A41.9, J69.0, R65.21, G82.50, L89.152, R47.01, L03.211, K21.9, I10, G89.29, Z66, H10.89, H05.20, F32.9, Z86.718, Z93.1, Z87.891, Z79.01, Z86.711, Z51.5
0210068	263371460	2016-03-07	2016-03-17	10	Z79.01	Long term (current) use of anticoagulants	23		A41.02, N17.0, J96.01, G82.50, J15.212, L89.152, Z66, R13.10, R65.20, Y95, E87.6, I10, H10.9, R19.7, Y92.239, T36.8X5A, D64.9, Z93.1, I69.320, I69.365, Z86.711, Z86.718, Z79.01
0213185	258847755	2015-09-28	2015-10-13	15	T45.1X5A	Adverse effect of antineoplastic and immunosuppres	29	Y	A41.51, N17.0, R65.21, G92, D61.810, C90.02, D47.2, D69.59, N18.3, Z66, Z51.5, E87.4, D68.9, Z94.84, Z94.81, D70.9, B99.9, I12.9, R50.81, E78.5, H02.402, H53.2, E83.39, E83.51, E83.42, E11.65, H49.32, Z99.2, T45.1X5A
0214827	258729458	2015-09-23	2015-10-07	14	R13.10	Dysphagia, unspecified	17	Y	J69.0, J96.01, I50.33, E46, J38.01, I27.2, R04.2, I48.2, R62.7, I07.1, Z79.01, G47.33, K21.9, D64.9, K44.9, D50.9, R13.10
0214827	259241479	2015-10-12	2015-10-25	13	Z79.01	Long term (current) use of anticoagulants	25		J18.9, J96.21, D65, I50.33, N17.9, E87.2, J38.00, E87.3, R04.2, Z66, Z51.5, J69.0, I27.2, J44.9, I48.91, Z93.1, D53.9, Y95, I10, G47.33, K44.9, D50.9, D63.8, R63.4, Z79.01
0221348	259051308	2015-10-05	2015-10-11	6	Z79.01	Long term (current) use of anticoagulants	21		I50.23, D61.818, N18.6, D69.6, I12.0, D62, I48.91, I48.92, B18.2, I25.10, D53.9, E87.5, E11.9, I25.2, Z99.2, Z95.5, Z95.0, Z95.1, Z95.2, Z86.73, Z79.01
0221964	262940398	2016-02-22	2016-03-04	11	Z87.891	Personal history of nicotine dependence	24		E10.10, I21.4, J18.9, N17.9, E27.1, N18.3, I25.82, E83.42, E10.21, I12.9, I25.10, E10.65, E06.3, E03.8, E87.6, G47.33, G47.00, E86.0, E31.0, Y95, I25.2, Z95.1, Z79.4, Z87.891
0221989	259973477	2015-11-05	2015-11-20	15	W01.0XXA	Fall on same level from slipping, tripping and stu	24	Y	J69.0, J96.21, D61.818, D68.0, J90, R13.10, A41.9, E87.2, F72, Z66, N39.0, R00.1, R62.7, D63.8, G40.909, I87.2, R32, I87.8, E29.1, E03.9, L30.9, Z95.0, S00.03XA, W01.0XXA
0221989	261692479	2016-01-11	2016-01-19	8	Z88.8	Allergy status to other drugs, medicaments and bio	15		A41.9, J15.211, R65.21, R00.1, E86.0, I34.0, F79, I87.2, E03.8, D89.2, G40.909, Z88.0, Z88.1, Z95.0, Z88.8
0221989	262453178	2016-02-04	2016-02-17	13	Z93.1	Gastrostomy status	21		R68.0, J96.01, J69.0, J90, D61.818, D68.0, F72, R47.01, T50.995A, I44.0, E03.9, R00.1, Y95, E07.81, I87.2, I87.8, E78.5, Z95.0, Z66, B35.4, Z93.1
0222866	261229710	2015-12-21	2015-12-24	3	R82.90	Unspecified abnormal findings in urine	16	Y	I50.43, I48.0, J44.9, I73.9, F32.9, I10, Z79.01, Z89.612, Z66, F17.210, Z96.642, I25.10, Z82.49, E78.5, M79.604, R82.90
0223183	259623965	2015-10-26	2015-10-27	1	Z85.528	Personal history of other malignant neoplasm of ki	10		C25.9, R18.0, N17.9, C78.7, E11.9, Z66, Z51.5, I10, Z90.5, Z85.528
0225434	262501000	2016-02-06	2016-02-15	9	Z99.81	Dependence on supplemental oxygen	20		A41.9, J96.22, R65.21, J69.0, R47.01, N17.9, N39.0, J44.9, E11.65, I25.10, E78.5, I10, I69.320, R47.1, K21.9, G40.409, K59.00, D64.9, G47.33, Z99.81
0225849	263177735	2016-03-01	2016-03-03	2	G47.33	Obstructive sleep apnea (adult) (pediatric)	7	Y	I30.1, I31.4, I10, D50.9, F17.210, M10.9, G47.33
0226766	260257985	2015-11-16	2015-11-18	2	Z79.4	Long term (current) use of insulin	22		I21.4, E11.42, I25.82, N39.0, I25.810, I25.10, I10, K21.9, Z91.19, I73.9, E11.65, M79.7, E78.2, E11.319, R74.8, I25.2, G47.33, I67.9, Z95.1, Z95.5, Z86.73, Z79.4
0232485	261313092	2015-12-24	2015-12-30	6	Z85.038	Personal history of other malignant neoplasm of la	16		A08.4, I21.4, N17.9, I50.42, I12.9, I51.7, I25.10, N18.3, I44.7, M10.9, E78.5, E83.42, D64.9, Z88.0, Z88.6, Z85.038
0239363	259211191	2015-10-11	2015-10-16	5	I34.0	Nonrheumatic mitral (valve) insufficiency	20	Y	I21.4, J96.01, N18.4, N17.9, I27.2, I13.0, I50.9, K50.90, I25.10, Z95.5, E53.8, Z66, E87.6, E83.42, E78.5, Z90.49, Z93.2, Z87.891, I25.2, I34.0
0243929	260511035	2015-11-24	2015-12-02	8	Z86.711	Personal history of pulmonary embolism	20		M70.21, J96.11, D68.61, D68.2, E88.01, K74.60, F33.9, L03.113, E11.9, J44.9, I10, B95.62, F41.9, E78.5, Z99.81, Z88.8, Z87.01, Z86.718, Z79.01, Z86.711
0245054	263677064	2016-03-16	2016-03-22	6	K31.9	Disease of stomach and duodenum, unspecified	26	Y	K31.84, E43, I69.354, D62, K94.23, Z68.1, J44.9, D49.7, I10, E03.9, M79.7, I25.10, J45.909, Z87.11, D50.9, G89.29, K21.9, K29.70, K29.80, F45.0, M54.9, M47.9, F41.9, R19.7, G43.909, K31.9
0252961	260511514	2015-11-24	2015-12-01	7	Z68.21	Body mass index (BMI) 21.0-21.9, adult	10		C15.4, R64, R13.10, K22.2, K22.10, R63.4, D50.9, K44.9, Z72.0, Z68.21
0257048	260001433	2015-11-06	2015-11-14	8	Z88.0	Allergy status to penicillin	21		N76.4, N39.0, E87.70, Z68.42, B37.9, L03.314, L03.311, J44.9, E11.9, E66.01, L73.2, Z22.322, J45.909, I10, G47.33, N83.20, K21.9, E78.5, Z86.718, F17.210, Z88.0
0257435	258766591	2015-09-25	2015-10-01	6	F32.9	Major depressive disorder, single episode, unspeci	9	Y	J96.00, E87.0, E87.2, F10.19, T48.1X2A, F17.210, R44.1, R21, F32.9
0263445	260566237	2015-11-27	2015-12-01	4	Z79.01	Long term (current) use of anticoagulants	13		S52.501A, I48.91, G30.9, F02.80, S42.211A, W18.30XA, I10, M81.0, F32.9, Z66, Z51.5, Y92.002, Z79.01
0264065	260982194	2015-12-11	2015-12-21	10	R07.89	Other chest pain	19	Y	J44.1, J96.21, Z99.81, F33.1, R13.10, T88.6XXA, Z68.42, F41.9, E11.65, G47.33, J45.909, K21.9, E66.01, T40.2X5A, Z88.1, Z88.5, G62.9, Z98.51, R07.89
0264488	262087737	2016-01-25	2016-02-04	10	E78.5	Hyperlipidemia, unspecified	19	Y	A41.9, J96.01, R65.20, J16.0, J96.02, E87.2, J98.11, I13.10, N18.3, D64.9, E86.9, I49.3, J44.9, L50.9, L21.9, Y95, T50.905A, L27.0, E78.5
0267933	258404607	2015-09-13	2015-10-21	38	Y83.1	Surgical operation with implant of artificial inte	17	Y	T84.53XA, R65.20, N17.9, G92, E87.2, F10.239, Z68.43, R45.851, E87.8, E87.6, E83.42, I10, D63.8, A49.01, E78.5, E66.01, Y83.1
0269842	260813605	2015-12-07	2015-12-10	3	Z79.4	Long term (current) use of insulin	15		G40.209, R47.01, I67.2, R29.810, E11.65, E78.5, R47.81, I10, D72.829, R07.9, G51.0, R94.01, R41.82, I65.21, Z79.4
0274950	263773343	2016-03-20	2016-03-24	4	Z86.73	Personal history of transient ischemic attack (TIA	12		A41.9, J69.0, R65.21, E87.2, E78.5, G47.33, H81.09, I10, J45.909, F32.9, Z91.14, Z86.73
0279370	262313216	2016-02-01	2016-02-12	11	Z79.4	Long term (current) use of insulin	18		A04.7, K51.90, D72.1, E11.65, K26.9, E86.1, I10, I25.10, Z95.1, R63.4, E78.5, K29.60, M10.9, M25.562, M25.521, M06.4, Z79.52, Z79.4
0279827	262901879	2016-02-19	2016-02-29	10	F17.210	Nicotine dependence, cigarettes, uncomplicated	23	Y	C13.8, R65.20, J69.0, R64, A41.9, R13.10, E87.2, E87.1, J44.0, Z68.1, I95.9, E87.8, E88.09, R91.1, R59.0, E86.0, D64.9, E87.6, K59.00, F41.9, I77.810, F10.20, F17.210
0280026	261397871	2015-12-29	2015-12-31	2	Z87.891	Personal history of nicotine dependence	10		E11.69, M86.171, I69.351, G62.9, I10, E11.65, I73.9, E78.5, Z79.4, Z87.891
0281275	261316210	2015-12-25	2016-01-12	18	F17.210	Nicotine dependence, cigarettes, uncomplicated	23	Y	C90.00, I50.9, M48.04, N17.9, G95.29, M84.58XA, N18.3, E87.1, N39.0, J98.4, R26.0, I12.9, R91.8, D64.9, R73.9, M47.816, Z77.098, R00.0, Z57.4, T38.0X5A, Z86.19, M19.90, F17.210
0285100	259204295	2015-10-09	2015-10-29	20	Z82.49	Family history of ischemic heart disease and other	25		R65.21, J96.01, N17.0, I21.4, I26.99, K26.4, E87.0, A41.9, J15.9, N18.3, I50.31, E87.3, D62, K92.1, I48.2, E11.9, M06.9, G47.33, Y95, I45.10, I12.9, E87.5, K44.9, K26.9, Z82.49
0287938	263898199	2016-03-23	2016-03-31	8	R63.4	Abnormal weight loss	7	Y	J85.2, I10, Z21, F17.210, R59.1, K21.9, R63.4
0292447	259205284	2015-10-10	2015-10-14	4	K91.840	Postprocedural hemorrhage and hematoma of a digest	15	N	K29.01, I95.9, D62, R55, K44.9, K21.9, E03.9, I10, E78.5, M19.90, M54.9, M25.551, I45.10, F32.9, K91.840
0292664	260378096	2015-11-19	2015-11-22	3	Z99.3	Dependence on wheelchair	21		T42.0X1A, D61.818, T86.12, N18.6, I12.0, E87.1, Z94.83, E87.8, H53.8, R42, R51, I44.0, S06.5X0D, G40.909, E10.319, I73.9, Z79.4, Z96.41, Z99.2, Z89.511, Z99.3
0296162	262650468	2016-02-12	2016-02-24	12	Z87.891	Personal history of nicotine dependence	20		T82.868A, E10.51, E10.40, M86.671, E27.40, L97.311, N39.0, E10.621, I70.234, D63.8, Y83.8, E10.649, E10.319, B95.62, B96.89, I45.10, Z79.4, E78.5, Z79.02, Z87.891
0300443	262917651	2016-02-22	2016-02-26	4	F17.200	Nicotine dependence, unspecified, uncomplicated	12	Y	J44.0, J96.01, R65.11, J18.9, E88.01, J67.9, F11.23, Z86.711, F41.9, F32.9, F19.10, F17.200
0303066	262166952	2016-03-03	2016-03-11	8	Z96.643	Presence of artificial hip joint, bilateral	25	Y	T84.031A, K85.9, I95.9, E87.2, B37.0, E87.1, E11.9, I48.0, D62, T84.051A, R55, Y79.2, E03.9, E78.5, I25.10, I10, M19.90, I49.1, I44.0, I73.9, I70.1, I65.23, Z82.49, K21.0, Z96.643
0304221	260987904	2015-12-12	2015-12-16	4	K44.9	Diaphragmatic hernia without obstruction or gangre	12	Y	K55.0, B39.9, J44.9, Z87.01, J47.9, D64.9, I10, K21.9, F41.9, I25.10, K57.90, K44.9
0308658	160160511	2015-12-09	2015-12-15	6	R56.9	Unspecified convulsions	16	Y	I63.9, G92, N17.9, N13.30, E87.1, E11.65, N40.0, N18.9, I12.9, E78.1, Z79.4, Z66, F03.90, I25.10, V49.9XXD, R56.9
0310091	261225387	2015-12-21	2015-12-30	9	Z87.891	Personal history of nicotine dependence	19		G40.209, G92, I47.2, F10.99, E87.1, I69.351, N39.0, R00.1, I10, E05.00, M10.9, Z66, M79.89, I49.9, E11.9, G47.33, Z91.013, Z98.49, Z87.891
0311966	259578516	2015-10-23	2015-11-24	32	Z87.891	Personal history of nicotine dependence	28		A40.1, I21.4, R65.21, M72.6, L89.94, N17.9, J96.10, E66.2, L97.414, E11.52, M86.8X7, Z68.43, F11.20, E11.621, I48.91, E11.65, Z79.4, M89.771, Z16.24, Z86.718, Z79.01, G47.33, D50.9, T81.4XXD, B96.5, G54.6, B96.20, Z87.891
0311966	260549415	2015-11-26	2015-12-31	35	S71.101A	Unspecified open wound, right thigh, initial encou	30	Y	T81.4XXA, R65.20, E43, N17.9, I96, L89.322, A41.9, I48.0, T87.43, E87.2, L03.115, Z68.43, F11.20, E66.01, E11.649, E88.81, G89.29, Z16.24, L89.312, I35.0, G54.6, I73.9, I12.9, N18.9, B96.5, G47.33, B96.20, Z16.21, S71.102A, S71.101A
0313410	262667447	2016-02-12	2016-03-02	19	F17.210	Nicotine dependence, cigarettes, uncomplicated	26	Y	C34.02, I63.9, I21.4, R65.20, I81, A41.9, C25.9, C78.7, R64, J18.9, N17.9, C77.1, C77.2, C79.51, I50.20, E87.1, G83.0, Z68.1, R13.10, R47.1, R26.2, J44.9, Z51.5, Z66, D64.9, F17.210
0315054	263777336	2016-03-21	2016-03-23	2	Z72.0	Tobacco use	15		I21.4, I10, F14.10, I25.10, J44.9, E78.1, K21.9, I34.0, D72.829, T38.0X5A, G89.29, M54.9, E66.9, Z68.35, Z72.0
0315404	258867969	2015-09-29	2015-10-07	8	Z79.4	Long term (current) use of insulin	24		K31.811, N17.8, D68.9, K22.10, D62, I50.32, K25.9, I25.10, Z95.1, K74.60, I10, I48.91, Z79.01, E78.5, E11.9, J44.9, G47.33, K21.9, Z86.73, I45.5, S80.11XA, Z91.81, F41.9, Z79.4
0315404	263507881	2016-03-10	2016-03-15	5	Z87.891	Personal history of nicotine dependence	23		K31.811, E87.0, E87.2, I50.32, E11.42, I48.2, D62, I10, E86.0, E11.65, R09.02, J44.9, J45.909, G47.33, K21.9, I25.10, Z79.01, Z79.4, E78.5, I25.2, Z95.1, Z86.73, Z87.891
0317234	261324669	2015-12-27	2015-12-30	3	Z98.51	Tubal ligation status	13		K25.4, D62, F31.9, T39.395A, F17.200, F12.90, F90.9, K44.9, K04.7, K25.9, K27.9, Z79.1, Z98.51
0317234	261468169	2016-01-02	2016-01-05	3	T39.395A	Adverse effect of other nonsteroidal anti-inflamma	11	Y	K25.4, K22.2, D62, K92.1, F31.9, F90.9, F12.90, K44.9, Z72.0, K08.9, T39.395A
0317516	261605869	2016-01-07	2016-01-28	21	Z99.2	Dependence on renal dialysis	26		A41.9, R65.21, J96.01, I50.33, E46, N18.6, L89.152, D62, T81.19XA, I12.0, L76.21, N39.0, L03.311, I48.91, E55.9, E83.42, E83.51, E83.59, E87.6, E78.5, E11.9, G47.33, L82.1, M47.896, I95.1, Z99.2
0317516	263326936	2016-03-04	2016-03-30	26	Z79.01	Long term (current) use of anticoagulants	25		A41.9, L89.159, L89.45, E46, K92.0, N18.6, I12.0, E11.21, N25.81, Z66, Z51.5, I48.91, I95.3, E87.70, D63.1, E78.5, E11.65, E83.59, E11.649, R60.1, S31.104D, S81.801D, S21.001D, Z99.2, Z79.01
0318646	260427315	2015-11-22	2015-12-02	10	Z79.82	Long term (current) use of aspirin	20		S06.5X9A, J96.00, J15.212, N17.9, A04.7, E87.1, Z86.73, G62.9, W10.9XXA, S09.90XA, J04.10, R63.1, G57.91, G57.92, E11.9, I10, J44.9, G47.33, Z72.0, Z79.82
0319765	259537223	2015-10-21	2015-10-26	5	Y92.238	Other place in hospital as the place of occurrence	25		N17.9, L89.159, I69.351, E11.21, E11.65, E87.5, Z68.41, R06.1, J44.9, E78.5, I12.9, N18.4, M48.06, E66.9, E86.0, T38.0X5A, Z79.4, Z87.01, Z88.1, Z87.891, Z79.82, Z79.52, Z79.51, Z98.62, Y92.238
0320486	261291066	2015-12-23	2015-12-25	2	Z79.01	Long term (current) use of anticoagulants	18		K92.2, E27.49, I50.30, D80.1, R55, D64.9, I25.10, D72.829, K21.9, E11.9, K29.70, K64.9, K57.90, J44.9, Z88.1, Z86.718, Z95.5, Z79.01
0321024	263590135	2016-03-14	2016-03-22	8	Z79.01	Long term (current) use of anticoagulants	8		I12.0, N25.81, N18.6, D63.8, Z99.2, Z86.711, K21.9, Z79.01
0323534	260222120	2015-11-15	2015-11-19	4	Z82.49	Family history of ischemic heart disease and other	15		C18.3, E46, C18.7, K76.89, J44.9, N28.1, D50.9, D72.829, K57.90, I73.9, D63.8, R94.39, I25.10, F17.210, Z82.49
0323534	263772089	2016-03-20	2016-03-22	2	Z85.048	Personal history of other malignant neoplasm of re	12		K91.840, N17.9, E87.2, J44.9, K92.1, D50.0, I10, E78.5, I73.9, K21.0, K31.9, Z85.048
0324928	259200046	2015-10-09	2015-10-13	4	Z85.72	Personal history of non-Hodgkin lymphomas	13		I12.0, N18.6, N17.9, N39.0, B96.5, E78.5, M10.9, E83.39, Z85.528, Z88.5, Z90.5, Z95.0, Z85.72
0326350	261851190	2016-01-15	2016-01-19	4	Z87.891	Personal history of nicotine dependence	30		E11.22, I50.23, G93.41, I47.2, E72.4, N18.6, K76.1, I12.0, I24.0, E87.1, D68.59, I42.9, E87.2, Z91.19, E11.65, G47.33, D72.829, E78.5, F17.220, N19, E83.39, I95.9, R10.11, L27.0, T36.1X5A, Z88.0, Z79.4, Z99.2, Z86.718, Z87.891
0326350	262082803	2016-01-24	2016-01-26	2	Z87.891	Personal history of nicotine dependence	13		I50.23, I12.0, I24.0, N18.6, E11.65, J98.11, Z99.2, R06.2, G47.33, E87.5, Z72.0, Z91.19, Z87.891
0326892	263541211	2016-03-11	2016-03-16	5	J40	Bronchitis, not specified as acute or chronic	20	Y	I26.92, Z68.41, I10, I82.512, I82.532, I82.542, I82.5Y2, M85.80, E03.9, J45.909, K21.9, L20.9, L71.9, R09.02, Z79.52, K58.9, G43.909, E66.9, R00.0, J40
0328380	262698673	2016-02-12	2016-02-17	5	Z87.891	Personal history of nicotine dependence	11		A41.9, J96.01, J15.9, J90, F03.90, Z66, E87.6, I10, Y95, Z86.12, Z87.891
0331922	263007288	2016-02-24	2016-03-03	8	Z86.73	Personal history of transient ischemic attack (TIA	10		D57.00, J15.211, B37.0, J99, E83.111, R04.0, J45.909, D58.9, Z86.718, Z86.73
0343514	259816957	2015-10-31	2015-11-04	4	Z92.3	Personal history of irradiation	6		A41.9, L03.115, I10, E78.5, Z85.821, Z92.3
0346765	260565387	2015-11-27	2015-12-14	17	J45.909	Unspecified asthma, uncomplicated	16	Y	K70.11, K76.6, E55.9, I47.1, G62.9, K70.31, R16.1, Z51.5, Z66, F43.21, I10, E87.6, R33.9, F39, R31.0, J45.909
0353617	259728285	2015-10-28	2015-10-30	2	R03.0	Elevated blood-pressure reading, without diagnosis	18	Y	A04.7, L89.329, N18.6, G21.11, N25.0, I12.0, F03.90, E11.9, D64.89, Z99.2, F31.9, G40.909, Z72.0, F17.210, T43.595D, Z91.15, K59.00, R03.0
0355868	260052022	2015-11-09	2015-11-19	10	Z87.440	Personal history of urinary (tract) infections	21		K57.31, L03.116, F03.90, L97.329, D62, Z68.1, F05, N28.1, E11.9, B95.62, D12.8, I73.9, I10, I25.10, R33.9, R63.6, K29.70, E78.5, Z85.9, Z95.5, Z87.440
0355868	261654313	2016-01-08	2016-01-13	5	Z95.5	Presence of coronary angioplasty implant and graft	12		I21.4, I50.31, T82.897A, I25.82, R13.10, I25.10, E11.9, I11.0, E78.5, Y84.0, I73.9, Z95.5
0357409	260788708	2015-12-07	2015-12-11	4	Z95.0	Presence of cardiac pacemaker	16		T81.4XXA, A41.9, R65.20, G40.409, Q21.1, L02.416, Z86.718, G47.33, E11.9, N40.0, I34.0, E78.5, Z79.01, B96.89, Y83.8, Z95.0
0357835	263005845	2016-02-23	2016-02-28	5	Z68.30	Body mass index (BMI) 30.0-30.9, adult	22		K64.8, J18.9, D61.810, C41.9, K29.71, E87.70, D62, K62.5, D46.9, I10, T45.1X5A, K64.4, K29.70, G40.909, K21.9, Y95, R50.81, E66.9, K59.00, Z88.8, Z91.048, Z68.30
0363466	262469737	2016-02-05	2016-02-08	3	G89.29	Other chronic pain	16	Y	T80.212A, C92.00, A41.9, D70.9, E53.8, L03.90, D69.6, J98.11, G47.33, E78.5, I10, N40.0, R73.09, I49.3, M54.5, G89.29
0363466	263105173	2016-02-26	2016-03-22	25	G47.33	Obstructive sleep apnea (adult) (pediatric)	25	Y	T80.211A, R65.20, N17.0, J18.9, G04.90, G93.41, C92.00, D61.818, A41.9, J98.11, E46, E87.0, I48.91, E86.0, G25.3, Z66, E87.6, Z78.1, Y95, R45.1, B37.2, E53.8, I10, E78.5, G47.33
0367361	259434710	2015-10-19	2015-10-23	4	D50.9	Iron deficiency anemia, unspecified	11	Y	I50.43, J96.01, N17.9, N39.0, J44.9, I27.2, Z99.81, N18.9, I12.9, I25.10, D50.9
0368958	259007375	2015-10-04	2015-10-06	2	Z87.442	Personal history of urinary calculi	12		K25.4, D50.0, E78.5, D62, I10, Z79.1, I25.10, M10.9, Z87.891, Z85.038, M19.90, Z87.442
0373387	259057149	2015-10-06	2015-10-07	1	Z79.82	Long term (current) use of aspirin	13		T42.4X2A, N18.6, M31.0, I12.0, Z94.0, F32.9, Z99.2, I25.10, I25.2, Z95.5, Z91.5, Z79.02, Z79.82
0374074	259771855	2015-10-29	2015-11-03	5	D63.8	Anemia in other chronic diseases classified elsewh	14	Y	K80.50, K76.0, D68.51, I82.622, Z68.42, K52.9, K21.9, R63.4, I10, Z86.718, F17.210, Z90.49, L29.9, D63.8
0374074	260179668	2015-11-12	2015-11-17	5	Z88.8	Allergy status to other drugs, medicaments and bio	18		E87.6, E72.11, Z68.41, E53.8, E55.9, K21.9, I10, D64.9, K52.9, E83.42, E66.01, F32.9, Z86.718, Z79.01, Z88.1, Z79.899, Z72.0, Z88.8
0374074	261071195	2015-12-15	2015-12-17	2	Z86.718	Personal history of other venous thrombosis and em	15		E53.8, D68.9, D68.51, E88.81, G63, K76.0, D52.9, F17.210, E66.01, E87.6, F32.9, K21.9, K52.9, Z88.1, Z86.718
0374074	261462709	2016-01-01	2016-01-03	2	Z88.5	Allergy status to narcotic agent status	21		A41.9, D68.2, K51.30, Z68.41, Z90.49, I10, K76.0, E87.8, G62.9, E66.01, R19.7, F17.210, F32.9, K21.9, K00.7, Z90.710, Z98.51, Z79.01, Z86.718, Z88.1, Z88.5
0374074	262911167	2016-02-20	2016-02-27	7	Z88.1	Allergy status to other antibiotic agents status	30		K22.4, E87.2, B37.0, D68.51, K76.0, N39.0, Z68.41, E86.0, E53.8, E87.6, E83.42, E83.51, I10, Z86.718, K21.9, R62.7, E66.01, G62.9, F32.9, R63.4, D64.9, K44.9, B96.20, E88.09, E86.1, F17.210, G89.29, K52.9, T45.515A, Z88.1
0376793	261317317	2015-12-26	2016-01-15	20	Z91.19	Patients noncompliance with other medical treatmen	25	Y	I63.512, I50.33, E87.2, D46.9, R47.01, R13.10, K92.1, J44.9, E11.9, D53.9, Z66, D63.8, G47.33, I10, I25.10, I35.0, R29.810, Z72.0, R47.1, K59.00, R33.9, R09.02, Q89.2, H91.90, Z91.19
0380715	263870313	2016-03-23	2016-03-29	6	Z79.4	Long term (current) use of insulin	15		A41.9, R65.21, E87.2, N18.6, L02.31, E11.22, Z99.2, E11.65, E89.0, E83.51, D64.9, I25.10, E87.6, N28.89, Z79.4
0381571	260984620	2015-12-12	2015-12-18	6	Z86.73	Personal history of transient ischemic attack (TIA	20		A41.9, R65.20, K85.1, E87.2, I50.20, K80.12, I48.0, F10.99, I10, E78.5, Z88.0, Z85.89, E03.9, Z66, Z95.810, Z79.01, I25.5, I25.2, K57.10, Z86.73
0382291	258908052	2015-09-30	2015-10-15	15	L21.9	Seborrheic dermatitis, unspecified	22	Y	A41.9, G04.2, R65.20, E13.10, T68.XXXA, J18.9, D69.6, N17.9, G04.90, K86.1, Z79.4, J45.909, E78.5, Z72.0, I12.9, N18.9, Z89.511, F10.10, I73.9, R13.10, L30.9, L21.9
0388968	262481393	2016-02-05	2016-02-08	3	F11.90	Opioid use, unspecified, uncomplicated	23	Y	A41.9, N17.9, E87.2, K92.0, K76.0, K57.32, K22.10, J45.909, G89.29, E78.5, M54.9, F41.9, E86.0, I10, F32.9, K21.9, Z87.891, K59.00, K21.0, D64.9, K29.60, M54.2, F11.90
0389213	263301277	2016-03-04	2016-03-21	17	Z87.891	Personal history of nicotine dependence	21		J18.9, J96.21, E87.2, I95.9, I50.9, J44.1, D62, Z99.81, K92.2, J96.22, E87.5, Z53.09, Z91.19, I48.91, F41.9, Z51.5, R21, G47.33, Z66, E03.9, Z87.891
0389908	262302805	2016-01-31	2016-02-02	2	E66.9	Obesity, unspecified	14	Y	A41.9, E87.2, N18.4, E11.21, L02.31, E87.1, F17.210, I12.9, E55.9, E11.65, B95.1, Z89.511, E86.1, E66.9
0392314	263108045	2016-02-26	2016-03-12	15	Z89.511	Acquired absence of right leg below knee	27		C25.9, C78.7, J44.9, Z93.0, R62.7, K75.9, E87.1, C32.9, Z66, Z51.5, L89.92, I10, I25.10, Z95.5, E78.5, E03.9, I73.9, R00.0, M48.00, G89.29, I25.2, Z95.810, Z72.0, Z85.21, Z79.01, Z86.711, Z89.511
0393876	259295533	2015-10-13	2015-11-04	22	G47.33	Obstructive sleep apnea (adult) (pediatric)	30	Y	A40.0, J96.01, R65.21, J86.9, J15.1, I47.2, N18.4, I48.2, I42.9, L89.153, E87.2, N17.9, I50.42, I69.354, N39.0, M86.672, L97.529, E11.21, E83.51, E83.42, E88.09, E83.39, D63.1, L03.032, I25.10, Z95.5, I73.9, I87.2, E87.6, G47.33
0397139	262673932	2016-02-12	2016-02-15	3	Z95.5	Presence of coronary angioplasty implant and graft	11		D61.818, I24.8, I25.110, E78.5, F32.9, F41.9, K21.9, K22.70, D46.9, Z85.828, Z95.5
0398821	262037989	2016-01-21	2016-01-29	8	Z88.6	Allergy status to analgesic agent status	25		A41.9, N17.0, J96.20, J90, I31.3, I50.32, I48.92, J98.11, R65.20, I48.2, I48.91, J44.9, E11.9, G47.33, G89.29, F17.200, K59.00, M54.9, I12.9, N18.9, I25.10, T46.0X5A, Z79.01, Z99.81, Z88.6
0400155	263617458	2016-03-15	2016-03-21	6	S46.009A	Unspecified injury of muscle(s) and tendon(s) of t	4	Y	K57.31, D50.0, I10, S46.009A
0400455	263343725	2016-03-06	2016-03-07	1	Z86.14	Personal history of Methicillin resistant Staphylo	10		T40.1X1A, F11.20, F14.10, B19.20, B86, F10.239, F17.200, R41.82, F19.10, Z86.14
0400863	259632107	2015-10-26	2015-11-09	14	K57.10	Diverticulosis of small intestine without perforat	22	Y	R62.7, E43, N17.9, N13.6, B37.81, N13.8, T83.51XA, N39.0, Z68.1, E87.5, N28.1, B96.5, N21.0, N40.1, D50.9, K29.70, Y73.8, I10, I25.10, K31.9, K44.9, K57.10
0401440	261323224	2015-12-27	2015-12-28	1	K29.00	Acute gastritis without bleeding	15	Y	K91.89, D62, I95.9, K92.2, C04.9, K26.9, D50.9, F10.10, F17.200, K57.90, K29.80, K64.8, K44.9, Z71.6, K29.00
0404504	259904126	2015-11-03	2015-11-11	8	Z99.81	Dependence on supplemental oxygen	13		J96.21, I50.1, I27.2, G47.33, I48.2, E11.9, I25.10, E78.5, I10, N40.0, J44.9, Z79.82, Z99.81
0408003	259397230	2015-10-16	2015-11-03	18	M21.379	Foot drop, unspecified foot	18	Y	G06.1, K68.12, M00.9, E87.1, L03.115, M86.671, L97.519, G97.41, M48.06, I10, M25.78, Z87.891, B95.4, D47.3, F41.9, A49.02, Y83.8, M21.379
0411445	259743086	2015-10-28	2015-11-05	8	I25.2	Old myocardial infarction	15		G00.9, G93.6, N17.9, C71.3, R00.1, I95.9, E87.1, D64.9, R47.01, I10, F17.200, D72.829, R73.9, Z79.82, I25.2
0423637	263348484	2016-03-06	2016-03-29	23	Z51.5	Encounter for palliative care	19		J96.22, I50.33, I47.2, I27.0, J18.9, I31.3, Z68.44, I48.91, E66.2, L03.90, J44.9, J96.21, E03.9, Z95.0, I05.9, N18.9, Z79.01, Z66, Z51.5
[truncated: 275 more rows]

## Sheet: Codes_By_FIN
FIN	CodeList
160160230	T27.3XXA, J96.21, E87.3, J44.1, T31.0, I50.20, T20.00XA, I48.2, Z99.81, K21.9, R23.4, G47.33, N40.0, Z86.711, F17.210, Z79.52, Z79.01
[truncated: 462 more rows]

## Sheet: Detail
MRN	FIN	Admit Dt	Disch Dt	LOS	Disch Disp	Age	Sex	Attd MD	Prin Dx	Prin Dx Desc	Px Code	Px Desc	Px Date	# Admits in Year	#ED Visits/6 Mth Prior	Hemoglobin Last Result Admit Dt	Sodium Last Result Admit Dt	LastAdmitted	30Readmit	DaysToReadmit	H	O	S	P	I	T	A	L	HOSPITAL_Total	HOSPITAL_HR	L	A	C	E	LACE_TOTAL	LACE_HR	LOS_1	LOS_2	LOS_3	LOS_4	AllDx	C_MI	C_Stroke	C_PVD	C_DMWO	C_CHF	C_DMW	C_CLD	C_MILDLR
[truncated: 463 more rows]
[truncated: 14 more columns]

[truncated: 2 more sheets: Sheet1, 30 Day Risk Adj Readmit]
